# Supplementary material for: Abiraterone acetate plus prednisolone with or without enzalutamide for patients with metastatic prostate cancer starting androgen deprivation therapy: final results from two randomised phase 3 trials of the STAMPEDE platform protocol
Source: PubMed Central journal article supplement (PMC7616864; doi:10.1016/s1470-2045(23)00148-1), 2023-05-01
Supplement: EMS200038-supplement-Appendix.pdf [file EMS200038-supplement-Appendix.pdf]

# THE LANCET Oncology

## Supplementary appendix

This appendix formed part of the original submission and has been peer reviewed. We post it as supplied by the authors.

Supplement to: Attard G, Murphy L, Clarke NW, et al. Abiraterone acetate plus prednisolone with or without enzalutamide for patients with metastatic prostate cancer starting androgen deprivation therapy: final results from two randomised phase 3 trials of the STAMPEDE platform protocol. *Lancet Oncol* 2023; **24**: 443–56.

# CONTENTS

## SECTION 1

### Supplementary Tables

|                                                                                                |    |
|------------------------------------------------------------------------------------------------|----|
| <b>S1.</b> Extended characteristics at randomisation                                           | 2  |
| <b>S2.</b> P values for tests of non-proportional hazards for each outcome                     | 3  |
| <b>S3.</b> Characteristics of patients planned (or not) for docetaxel after protocol amendment | 4  |
| <b>S4.</b> First type of event counted for calculating failure-free survival                   | 5  |
| <b>S5.</b> Reasons for permanent stopping of treatment                                         | 6  |
| <b>S6.</b> Adverse events by body system                                                       | 7  |
| <b>S7.</b> Serious adverse reactions and suspected unexpected serious adverse reactions        | 14 |

### Supplementary Figures

|                                                                                                                                                                                  |    |
|----------------------------------------------------------------------------------------------------------------------------------------------------------------------------------|----|
| <b>S1.</b> Trials in the STAMPEDE platform protocol that recruited metastatic patients contemporaneously with or prior to the abiraterone or abiraterone and enzalutamide trials | 15 |
| <b>S2.</b> Weeks from randomisation to starting allocated research treatments.                                                                                                   | 16 |
| <b>S3.</b> Treatment effect on survival over time                                                                                                                                | 17 |
| <b>S4.</b> Failure free survival split by low (A) and high (B) volume                                                                                                            | 18 |
| <b>S5.</b> Progression free survival                                                                                                                                             | 19 |
| <b>S6.</b> Skeletal-related events                                                                                                                                               | 20 |
| <b>S7.</b> First life-prolonging treatment administered after progression.                                                                                                       | 21 |
| <b>S8.</b> Time from starting to permanently stopping research treatments                                                                                                        | 22 |
| <b>S9.</b> Adverse events.                                                                                                                                                       | 23 |
| <b>S10.</b> Grade 5 adverse events                                                                                                                                               | 24 |

## SECTION 2

|                                                                                                                                              |     |
|----------------------------------------------------------------------------------------------------------------------------------------------|-----|
| <b>STAMPEDE protocol v21</b>                                                                                                                 | 25  |
| <b>Statistical analysis plan for abiraterone and enzalutamide trial including meta-analysis with abiraterone trial in M0 and M1 patients</b> | 176 |
| <b>List of collaborators</b>                                                                                                                 | 217 |

**Table S1.** Extended characteristics at randomisation (not included in Main Table 1).

| Characteristic                               |                              | Abiraterone trial |            | Abiraterone and enzalutamide trial |             |
|----------------------------------------------|------------------------------|-------------------|------------|------------------------------------|-------------|
|                                              |                              | SOC only          | SOC+Abi    | SOC                                | SOC+Enz+Abi |
|                                              |                              | N (%)             | N (%)      | N (%)                              | N (%)       |
| Short term bisphosphonate use                | No                           | 502 (100%)        | 499 (100%) | 452 (100%)                         | 462 (100%)  |
|                                              | Yes                          | 0 (0%)            | 2 (<1%)    | 2 (<1%)                            | 0 (0%)      |
| Planned anti-androgen                        | No                           | 45 (9%)           | 43 (9%)    | 33 (7%)                            | 43 (9%)     |
|                                              | Short (disease flare)        | 456 (91%)         | 458 (91%)  | 420 (93%)                          | 419 (91%)   |
|                                              | MAB                          | 1 (<1%)           | 0 (0%)     | 1 (<1%)                            | 0 (0%)      |
| Hormone therapy started before randomisation | No                           | 22 (4%)           | 18 (4%)    | 7 (2%)                             | 3 (1%)      |
|                                              | Yes                          | 480 (96%)         | 483 (96%)  | 447 (98%)                          | 459 (99%)   |
| Hypertension                                 | No                           | 315 (63%)         | 291 (58%)  | 282 (62%)                          | 277 (60%)   |
|                                              | Yes, but still fit for trial | 187 (37%)         | 209 (42%)  | 171 (38%)                          | 183 (40%)   |
| <b>Total</b>                                 |                              | <b>502</b>        | <b>501</b> | <b>454</b>                         | <b>462</b>  |

20 patients across both trials did not meet all eligibility criteria.

SOC, standard-of-care, Abi, abiraterone acetate and prednisolone; Enz, enzalutamide

**Table S2.** P-values for tests of non-proportional hazards for each outcome

| <b>Outcome measure</b>                     | <b>Abiraterone trial</b> | <b>Enzalutamide and abiraterone trial</b> |
|--------------------------------------------|--------------------------|-------------------------------------------|
| Overall Survival                           | 0.366                    | 0.004                                     |
| Prostate cancer specific survival          | 0.770                    | 0.004                                     |
| Metastatic progression-free-survival       | 0.106                    | 0.135                                     |
| Progression-free survival                  | 0.070                    | 0.214                                     |
| Failure-free survival                      | 0.035                    | 0.026                                     |
| Symptomatic skeletal-related free survival | 0.305                    | 0.714                                     |

**Table S3.** Characteristics of patients planned (or not) for docetaxel after protocol amendment

| Characteristic                   |         | No docetaxel | Docetaxel (planned) |
|----------------------------------|---------|--------------|---------------------|
| <b>Age</b>                       | < 70    | 36 (53%)     | 54 (67%)            |
|                                  | 70+     | 32 (47%)     | 26 (33%)            |
| <b>N stage</b>                   | N0      | 28 (41%)     | 20 (25%)            |
|                                  | N+      | 38 (56%)     | 56 (70%)            |
|                                  | NX      | 2 (3%)       | 4 (5%)              |
| <b>T stage</b>                   | T0      | 2 (3%)       | 0 (0%)              |
|                                  | T2      | 5 (7%)       | 5 (6%)              |
|                                  | T3      | 38 (56%)     | 46 (58%)            |
|                                  | T4      | 1 (21%)      | 23 (29%)            |
|                                  | Tx      | 9 (13%)      | 6 (8%)              |
| <b>WHO PS</b>                    | 0       | 49 (72%)     | 56 (70%)            |
|                                  | 1-2     | 19 (28%)     | 24 (30%)            |
| <b>NSAID/aspirin</b>             | No      | 46 (68%)     | 61 (76%)            |
|                                  | Yes     | 32 (32%)     | 19 (24%)            |
| <b>Gleason sum</b>               | < 7     | 14 (21%)     | 7 (9%)              |
|                                  | 8-10    | 53 (78%)     | 68 (85%)            |
|                                  | missing | 1 (1%)       | 5 (6%)              |
| <b>Pain from prostate cancer</b> | No      | 60 (88%)     | 63 (79%)            |
|                                  | Yes     | 8 (12%)      | 17 (21%)            |
| <b>CHAARTED volume</b>           | Low     | 23 (34%)     | 30 (38%)            |
|                                  | High    | 30 (44%)     | 39 (49%)            |
|                                  | Missing | 15 (22%)     | 11 (14%)            |
| <b>Total</b>                     |         | 68 (100%)    | 80 (100%)           |

**Table S4.** First type of event counted for calculating failure-free survival, split by treatment allocation.

| Characteristic                       | Abiraterone trial |     |            |     | Abiraterone and enzalutamide trial |     |             |     |
|--------------------------------------|-------------------|-----|------------|-----|------------------------------------|-----|-------------|-----|
|                                      | SOC only          |     | SOC+Abi    |     | SOC                                |     | SOC+Enz+Abi |     |
|                                      | N (%)             |     | N (%)      |     | N (%)                              |     | N (%)       |     |
| Patients randomised                  | 502               |     | 501        |     | 454                                |     | 462         |     |
| <b>Failure-free survival event</b>   | <b>455</b>        |     | <b>301</b> |     | <b>377</b>                         |     | <b>237</b>  |     |
| <b>First event: (% of events)</b>    |                   |     |            |     |                                    |     |             |     |
| Biochemical failure                  | 384               | 85% | 197        | 66% | 310                                | 83% | 147         | 63% |
| Prostate cancer related death        | 4                 | 1%  | 8          | 3%  | 6                                  | 1%  | 8           | 4%  |
| Distant metastases (new/progression) | 43                | 10% | 71         | 24% | 39                                 | 10% | 51          | 22% |
| Lymph node involvement               | 3                 | 1%  | 7          | 2%  | 6                                  | 2%  | 4           | 2%  |
| Skeletal-related event               | 7                 | 2%  | 5          | 2%  | 4                                  | 1%  | 11          | 5%  |
| Local progression                    | 10                | 2%  | 12         | 4%  | 10                                 | 3%  | 10          | 4%  |

SOC, standard-of-care, Abi, abiraterone acetate and prednisolone; Enz, enzalutamide

**Table S5.** Reasons for permanent stopping abiraterone in the abiraterone trial (A) or abiraterone and/or enzalutamide in the abiraterone and enzalutamide trial (B).

**A**

| Reason for stopping abiraterone | N          | %           |
|---------------------------------|------------|-------------|
| Treatment complete              | 5          | 1%          |
| Excessive toxicity              | 65         | 13%         |
| Disease progression             | 202        | 41%         |
| Death                           | 10         | 2%          |
| Other/Unknown                   | 12         | 2%          |
| Patient choice                  | 28         | 6%          |
| Clinician decision              | 24         | 5%          |
| Intercurrent Illness            | 23         | 5%          |
| Not stopped*                    | 129        | 26%         |
| <b>Total</b>                    | <b>498</b> | <b>100%</b> |

**B**

| Reason for stopping abiraterone | Reason for stopping enzalutamide |                    |                     |           |                |                    |                      |                |                           | Total      |     |
|---------------------------------|----------------------------------|--------------------|---------------------|-----------|----------------|--------------------|----------------------|----------------|---------------------------|------------|-----|
|                                 | Treatment complete               | Excessive toxicity | Disease progression | Death     | Patient choice | Clinician decision | Intercurrent Illness | Unknown/Other* | Not reported as stopped** | N          | %   |
| Treatment complete              | 2                                | 0                  | 0                   | 0         | 0              | 1                  | 0                    | 0              | 0                         | 3          | 1%  |
| Excessive toxicity              | 0                                | 66                 | 20                  | 0         | 4              | 4                  | 1                    | 1              | 24                        | 120        | 27% |
| Disease progression             | 0                                | 4                  | 121                 | 0         | 0              | 0                  | 1                    | 0              | 2                         | 128        | 29% |
| Death                           | 0                                | 0                  | 0                   | 3         | 0              | 0                  | 0                    | 0              | 0                         | 3          | 1%  |
| Patient choice                  | 0                                | 3                  | 1                   | 0         | 25             | 0                  | 0                    | 0              | 0                         | 29         | 7%  |
| Clinician decision              | 0                                | 1                  | 0                   | 0         | 0              | 12                 | 0                    | 0              | 0                         | 13         | 3%  |
| Intercurrent Illness            | 0                                | 0                  | 1                   | 0         | 1              | 0                  | 13                   | 0              | 1                         | 16         | 4%  |
| Unknown/Other**                 | 0                                | 0                  | 1                   | 0         | 0              | 1                  | 0                    | 2              | 0                         | 4          | 1%  |
| Not stopped***                  | 0                                | 6                  | 0                   | 1         | 2              | 3                  | 1                    | 1              | 115                       | 129        | 29% |
| <b>Total</b>                    | <b>2</b>                         | <b>80</b>          | <b>144</b>          | <b>4</b>  | <b>32</b>      | <b>21</b>          | <b>16</b>            | <b>4</b>       | <b>142</b>                | <b>445</b> |     |
| <b>%</b>                        | <b>&lt;1%</b>                    | <b>18%</b>         | <b>32%</b>          | <b>1%</b> | <b>7%</b>      | <b>5%</b>          | <b>4%</b>            | <b>1%</b>      | <b>32%</b>                |            |     |

\* 12 patients died before reporting stopping abiraterone

\*\* Other reasons: One patient stopped both treatments due to returning to home country. Two patients had difficulty swallowing tablets.

\*\*\* 21 patients died before reporting stopping either treatment

**Table S6.** Adverse events by body system. Grade 4 and 5 events  $\geq 1$  in red font. Includes patients who received  $\geq 1$  dose of research treatment. Graded by National Cancer Institute Common Terminology Criteria for Adverse Events (initially, version 3.0; then STAMPEDE protocol v15 implemented 15 May 2016 updated to version 4.0).

|                                     | Standard of care in the abiraterone trial (n=502) |         |         |         | Standard of care in the abiraterone and enzalutamide trial (n=454) |         |         |         | Standard of care plus abiraterone acetate and prednisolone (n=498) |         |         |         | Standard of care plus abiraterone acetate and prednisolone and enzalutamide trial (n=445) |         |         |         |
|-------------------------------------|---------------------------------------------------|---------|---------|---------|--------------------------------------------------------------------|---------|---------|---------|--------------------------------------------------------------------|---------|---------|---------|-------------------------------------------------------------------------------------------|---------|---------|---------|
|                                     | Grade 1–2                                         | Grade 3 | Grade 4 | Grade 5 | Grade 1–2                                                          | Grade 3 | Grade 4 | Grade 5 | Grade 1–2                                                          | Grade 3 | Grade 4 | Grade 5 | Grade 1–2                                                                                 | Grade 3 | Grade 4 | Grade 5 |
| <b>Blood body system</b>            |                                                   |         |         |         |                                                                    |         |         |         |                                                                    |         |         |         |                                                                                           |         |         |         |
| Anaemia                             | 179 (36%)                                         | 6 (1%)  | 1 (<1%) | 0 (0%)  | 203 (45%)                                                          | 9 (2%)  | 0 (0%)  | 0 (0%)  | 238 (48%)                                                          | 5 (1%)  | 1 (<1%) | 0 (0%)  | 221 (50%)                                                                                 | 7 (2%)  | 0 (0%)  | 0 (0%)  |
| Febrile neutropenia                 | n/a                                               | 2 (<1%) | 0 (0%)  | 0 (0%)  | n/a                                                                | 12 (3%) | 5 (1%)  | 0 (0%)  | n/a                                                                | 3 (1%)  | 0 (0%)  | 0 (0%)  | n/a                                                                                       | 1 (<1%) | 4 (1%)  | 0 (0%)  |
| Blood - other                       | 0 (0%)                                            | 0 (0%)  | 0 (0%)  | 0 (0%)  | 1 (<1%)                                                            | 0 (0%)  | 0 (0%)  | 0 (0%)  | 0 (0%)                                                             | 0 (0%)  | 0 (0%)  | 0 (0%)  | 0 (0%)                                                                                    | 1 (<1%) | 0 (0%)  | 0 (0%)  |
| <b>Cardiac body system</b>          |                                                   |         |         |         |                                                                    |         |         |         |                                                                    |         |         |         |                                                                                           |         |         |         |
| Acute coronary syndrome             | 0 (0%)                                            | 1 (<1%) | 2 (<1%) | 1 (<1%) | 2 (<1%)                                                            | 2 (<1%) | 3 (1%)  | 0 (0%)  | 3 (1%)                                                             | 2 (<1%) | 3 (1%)  | 0 (0%)  | 3 (1%)                                                                                    | 8 (2%)  | 3 (1%)  | 2 (<1%) |
| Atrial fibrillation                 | 0 (0%)                                            | 0 (0%)  | 0 (0%)  | 0 (0%)  | 0 (0%)                                                             | 0 (0%)  | 0 (0%)  | 0 (0%)  | 0 (0%)                                                             | 0 (0%)  | 0 (0%)  | 0 (0%)  | 0 (0%)                                                                                    | 0 (0%)  | 0 (0%)  | 0 (0%)  |
| Chest pain                          | 0 (0%)                                            | 0 (0%)  | n/a     | n/a     | 3 (1%)                                                             | 1 (<1%) | n/a     | n/a     | 0 (0%)                                                             | 0 (0%)  | n/a     | n/a     | 0 (0%)                                                                                    | 3 (1%)  | n/a     | n/a     |
| Heart failure                       | 1 (<1%)                                           | 0 (0%)  | 0 (0%)  | 0 (0%)  | 2 (<1%)                                                            | 0 (0%)  | 0 (0%)  | 0 (0%)  | 0 (0%)                                                             | 0 (0%)  | 1 (<1%) | 0 (0%)  | 0 (0%)                                                                                    | 1 (<1%) | 0 (0%)  | 0 (0%)  |
| Cardiac dysrhythmia                 | 22 (4%)                                           | 0 (0%)  | 0 (0%)  | 0 (0%)  | 12 (3%)                                                            | 2 (<1%) | 0 (0%)  | 0 (0%)  | 29 (6%)                                                            | 10 (2%) | 3 (1%)  | 0 (0%)  | 29 (7%)                                                                                   | 3 (1%)  | 0 (0%)  | 0 (0%)  |
| Cardiac - other                     | 1 (<1%)                                           | 0 (0%)  | 0 (0%)  | 0 (0%)  | 1 (<1%)                                                            | 1 (<1%) | 0 (0%)  | 0 (0%)  | 0 (0%)                                                             | 0 (0%)  | 0 (0%)  | 0 (0%)  | 0 (0%)                                                                                    | 2 (<1%) | 1 (<1%) | 3 (<1%) |
| <b>Eye, ear body system</b>         |                                                   |         |         |         |                                                                    |         |         |         |                                                                    |         |         |         |                                                                                           |         |         |         |
| Ears                                | 0 (0%)                                            | 0 (0%)  | 0 (0%)  | 0 (0%)  | 2 (<1%)                                                            | 1 (<1%) | 0 (0%)  | 0 (0%)  | 0 (0%)                                                             | 0 (0%)  | 0 (0%)  | 0 (0%)  | 0 (0%)                                                                                    | 1 (<1%) | 0 (0%)  | 0 (0%)  |
| Blurred vision                      | 16 (3%)                                           | 1 (<1%) | 0 (0%)  | 0 (0%)  | 27 (6%)                                                            | 0 (0%)  | 0 (0%)  | 0 (0%)  | 31 (6%)                                                            | 1 (<1%) | 0 (0%)  | 0 (0%)  | 26 (6%)                                                                                   | 0 (0%)  | 0 (0%)  | 0 (0%)  |
| Cataract (infective conjunctivitis) | 1 (<1%)                                           | 1 (<1%) | 0 (0%)  | 0 (0%)  | 9 (2%)                                                             | 4 (1%)  | 0 (0%)  | 0 (0%)  | 6 (1%)                                                             | 0 (0%)  | 0 (0%)  | 0 (0%)  | 0 (0%)                                                                                    | 2 (<1%) | 0 (0%)  | 0 (0%)  |
| Eye disorders - other               | 2 (<1%)                                           | 0 (0%)  | 0 (0%)  | 0 (0%)  | 1 (<1%)                                                            | 0 (0%)  | 0 (0%)  | 0 (0%)  | 4 (1%)                                                             | 1 (<1%) | 0 (0%)  | 0 (0%)  | 5 (1%)                                                                                    | 0 (0%)  | 0 (0%)  | 0 (0%)  |
| Eye disorders - other               | 20 (4%)                                           | 0 (0%)  | 0 (0%)  | 0 (0%)  | 28 (6%)                                                            | 1 (<1%) | 0 (0%)  | 0 (0%)  | 40 (8%)                                                            | 6 (1%)  | 0 (0%)  | 0 (0%)  | 47 (11%)                                                                                  | 4 (1%)  | 0 (0%)  | 0 (0%)  |



|                            | Standard of care in the abiraterone trial (n=502) |         |         |         | Standard of care in the abiraterone and enzalutamide trial (n=454) |         |         |         | Standard of care plus abiraterone acetate and prednisolone (n=498) |         |         |         | Standard of care plus abiraterone acetate and prednisolone and enzalutamide trial (n=445) |         |         |         |
|----------------------------|---------------------------------------------------|---------|---------|---------|--------------------------------------------------------------------|---------|---------|---------|--------------------------------------------------------------------|---------|---------|---------|-------------------------------------------------------------------------------------------|---------|---------|---------|
|                            | Grade 1-2                                         | Grade 3 | Grade 4 | Grade 5 | Grade 1-2                                                          | Grade 3 | Grade 4 | Grade 5 | Grade 1-2                                                          | Grade 3 | Grade 4 | Grade 5 | Grade 1-2                                                                                 | Grade 3 | Grade 4 | Grade 5 |
| <b>GI body system</b>      |                                                   |         |         |         |                                                                    |         |         |         |                                                                    |         |         |         |                                                                                           |         |         |         |
| Abdominal pain             | 50 (10%)                                          | 7 (1%)  | 0 (0%)  | 0 (0%)  | 66 (15%)                                                           | 2 (<1%) | 0 (0%)  | 0 (0%)  | 96 (19%)                                                           | 8 (2%)  | 0 (0%)  | 0 (0%)  | 69 (16%)                                                                                  | 4 (1%)  | 0 (0%)  | 0 (0%)  |
| Constipation               | 106 (21%)                                         | 5 (1%)  | 0 (0%)  | 0 (0%)  | 136 (30%)                                                          | 1 (<1%) | 0 (0%)  | 0 (0%)  | 145 (29%)                                                          | 4 (1%)  | 0 (0%)  | 0 (0%)  | 166 (37%)                                                                                 | 6 (1%)  | 0 (0%)  | 0 (0%)  |
| Diarrhoea                  | 75 (15%)                                          | 3 (1%)  | 0 (0%)  | 0 (0%)  | 90 (20%)                                                           | 3 (1%)  | 0 (0%)  | 0 (0%)  | 114 (23%)                                                          | 9 (2%)  | 0 (0%)  | 0 (0%)  | 130 (29%)                                                                                 | 10 (2%) | 0 (0%)  | 0 (0%)  |
| Lower GI haemorrhage       | 1 (<1%)                                           | 0 (0%)  | 0 (0%)  | 0 (0%)  | 3 (1%)                                                             | 0 (0%)  | 0 (0%)  | 0 (0%)  | 6 (1%)                                                             | 1 (<1%) | 0 (0%)  | 0 (0%)  | 9 (2%)                                                                                    | 1 (<1%) | 0 (0%)  | 0 (0%)  |
| Nausea                     | 51 (10%)                                          | 0 (0%)  | n/a     | n/a     | 66 (15%)                                                           | 3 (1%)  | n/a     | n/a     | 96 (19%)                                                           | 1 (<1%) | n/a     | n/a     | 119 (27%)                                                                                 | 3 (1%)  | n/a     | n/a     |
| Upper GI haemorrhage       | 0 (0%)                                            | 0 (0%)  | 0 (0%)  | 0 (0%)  | 0 (0%)                                                             | 0 (0%)  | 0 (0%)  | 0 (0%)  | 0 (0%)                                                             | 0 (0%)  | 0 (0%)  | 0 (0%)  | 0 (0%)                                                                                    | 1 (<1%) | 0 (0%)  | 0 (0%)  |
| Vomiting                   | 25 (5%)                                           | 0 (0%)  | 1 (<1%) | 0 (0%)  | 32 (7%)                                                            | 3 (1%)  | 0 (0%)  | 0 (0%)  | 49 (10%)                                                           | 4 (1%)  | 0 (0%)  | 0 (0%)  | 51 (11%)                                                                                  | 5 (1%)  | 0 (0%)  | 0 (0%)  |
| Flatulence                 | 51 (10%)                                          | 0 (0%)  | 0 (0%)  | 0 (0%)  | 57 (13%)                                                           | 0 (0%)  | 0 (0%)  | 0 (0%)  | 73 (15%)                                                           | 0 (0%)  | 0 (0%)  | 0 (0%)  | 0 (0%)                                                                                    | 0 (0%)  | 0 (0%)  | 0 (0%)  |
| Dyspepsia                  | 52 (10%)                                          | 0 (0%)  | 0 (0%)  | 0 (0%)  | 53 (12%)                                                           | 0 (0%)  | 0 (0%)  | 0 (0%)  | 98 (20%)                                                           | 0 (0%)  | 0 (0%)  | 0 (0%)  | 0 (0%)                                                                                    | 2 (<1%) | 0 (0%)  | 0 (0%)  |
| GI haemorrhage             | 14 (3%)                                           | 2 (<1%) | 0 (0%)  | 0 (0%)  | 8 (2%)                                                             | 1 (<1%) | 0 (0%)  | 0 (0%)  | 16 (3%)                                                            | 0 (0%)  | 0 (0%)  | 0 (0%)  | 0 (0%)                                                                                    | 2 (<1%) | 0 (0%)  | 0 (0%)  |
| GI - other                 | 50 (10%)                                          | 9 (2%)  | 2 (<1%) | 0 (0%)  | 53 (12%)                                                           | 8 (2%)  | 4 (1%)  | 1 (<1%) | 98 (20%)                                                           | 15 (3%) | 3 (1%)  | 1 (<1%) | 92 (21%)                                                                                  | 4 (1%)  | 6 (1%)  | 0 (0%)  |
| <b>General body system</b> |                                                   |         |         |         |                                                                    |         |         |         |                                                                    |         |         |         |                                                                                           |         |         |         |
| Fatigue                    | 261 (52%)                                         | 11 (2%) | n/a     | n/a     | 296 (65%)                                                          | 13 (3%) | n/a     | n/a     | 329 (66%)                                                          | 13 (3%) | n/a     | n/a     | 348 (78%)                                                                                 | 34 (8%) | n/a     | n/a     |
| Fever                      | 15 (3%)                                           | 0 (0%)  | 0 (0%)  | 0 (0%)  | 29 (6%)                                                            | 1 (<1%) | 0 (0%)  | 0 (0%)  | 31 (6%)                                                            | 1 (<1%) | 0 (0%)  | 0 (0%)  | 26 (6%)                                                                                   | 5 (1%)  | 0 (0%)  | 0 (0%)  |
| Irritability               | 0 (0%)                                            | 0 (0%)  | n/a     | n/a     | 11 (2%)                                                            | 0 (0%)  | n/a     | n/a     | 0 (0%)                                                             | 0 (0%)  | n/a     | n/a     | 0 (0%)                                                                                    | 0 (0%)  | n/a     | n/a     |
| Localised (o)dema          | 76 (15%)                                          | 1 (<1%) | n/a     | n/a     | 97 (21%)                                                           | 2 (<1%) | n/a     | n/a     | 118 (24%)                                                          | 2 (<1%) | n/a     | n/a     | 116 (26%)                                                                                 | 4 (1%)  | n/a     | n/a     |
| Multi-organ failure        | 0 (0%)                                            | 0 (0%)  | 0 (0%)  | 0 (0%)  | 0 (0%)                                                             | 0 (0%)  | 0 (0%)  | 0 (0%)  | 0 (0%)                                                             | 0 (0%)  | 0 (0%)  | 0 (0%)  | 0 (0%)                                                                                    | 0 (0%)  | 0 (0%)  | 0 (0%)  |
| Non-cardiac chest pain     | 0 (0%)                                            | 0 (0%)  | 0 (0%)  | 0 (0%)  | 0 (0%)                                                             | 1 (<1%) | 0 (0%)  | 0 (0%)  | 0 (0%)                                                             | 0 (0%)  | 0 (0%)  | 0 (0%)  | 0 (0%)                                                                                    | 1 (<1%) | 0 (0%)  | 0 (0%)  |
| Fall                       | 6 (1%)                                            | 1 (<1%) | 0 (0%)  | 0 (0%)  | 15 (3%)                                                            | 4 (1%)  | 0 (0%)  | 0 (0%)  | 15 (3%)                                                            | 4 (1%)  | 0 (0%)  | 0 (0%)  | 37 (8%)                                                                                   | 6 (1%)  | 0 (0%)  | 0 (0%)  |
| Flu-like symptoms          | 30 (6%)                                           | 0 (0%)  | 0 (0%)  | 0 (0%)  | 22 (5%)                                                            | 0 (0%)  | 0 (0%)  | 0 (0%)  | 59 (12%)                                                           | 1 (<1%) | 0 (0%)  | 0 (0%)  | 34 (8%)                                                                                   | 0 (0%)  | 0 (0%)  | 0 (0%)  |
| Oral candidiasis           | 1 (<1%)                                           | 0 (0%)  | 0 (0%)  | 0 (0%)  | 4 (1%)                                                             | 0 (0%)  | 0 (0%)  | 0 (0%)  | 8 (2%)                                                             | 1 (<1%) | 0 (0%)  | 0 (0%)  | 8 (2%)                                                                                    | 0 (0%)  | 0 (0%)  | 0 (0%)  |
| Generalised pain           | 151 (30%)                                         | 3 (1%)  | 0 (0%)  | 0 (0%)  | 126 (28%)                                                          | 5 (1%)  | 0 (0%)  | 0 (0%)  | 168 (34%)                                                          | 7 (1%)  | 0 (0%)  | 0 (0%)  | 106 (24%)                                                                                 | 7 (2%)  | 0 (0%)  | 0 (0%)  |
| General and admin - other  | 41 (8%)                                           | 3 (1%)  | 3 (1%)  | 0 (0%)  | 32 (7%)                                                            | 7 (2%)  | 0 (0%)  | 0 (0%)  | 70 (14%)                                                           | 8 (2%)  | 3 (1%)  | 2 (<1%) | 70 (16%)                                                                                  | 3 (1%)  | 2 (<1%) | 2 (<1%) |

|                                                       | Standard of care in the abiraterone trial (n=502) |         |         |         | Standard of care in the abiraterone and enzalutamide trial (n=454) |         |         |         | Standard of care plus abiraterone acetate and prednisolone (n=498) |         |         |         | Standard of care plus abiraterone acetate and prednisolone and enzalutamide trial (n=445) |         |         |         |
|-------------------------------------------------------|---------------------------------------------------|---------|---------|---------|--------------------------------------------------------------------|---------|---------|---------|--------------------------------------------------------------------|---------|---------|---------|-------------------------------------------------------------------------------------------|---------|---------|---------|
|                                                       | Grade 1-2                                         | Grade 3 | Grade 4 | Grade 5 | Grade 1-2                                                          | Grade 3 | Grade 4 | Grade 5 | Grade 1-2                                                          | Grade 3 | Grade 4 | Grade 5 | Grade 1-2                                                                                 | Grade 3 | Grade 4 | Grade 5 |
| <b>Hepatobiliary disorders</b>                        |                                                   |         |         |         |                                                                    |         |         |         |                                                                    |         |         |         |                                                                                           |         |         |         |
| Cholecystitis                                         | 0 (0%)                                            | 0 (0%)  | 0 (0%)  | 0 (0%)  | 0 (0%)                                                             | 1 (<1%) | 0 (0%)  | 0 (0%)  | 0 (0%)                                                             | 0 (0%)  | 0 (0%)  | 0 (0%)  | 0 (0%)                                                                                    | 0 (0%)  | 0 (0%)  | 0 (0%)  |
| Abnormal hepatic function                             | 28 (6%)                                           | 1 (<1%) | 0 (0%)  | 0 (0%)  | 13 (3%)                                                            | 1 (<1%) | 0 (0%)  | 0 (0%)  | 54 (11%)                                                           | 8 (2%)  | 1 (<1%) | 0 (0%)  | 24 (5%)                                                                                   | 3 (1%)  | 0 (0%)  | 0 (0%)  |
| Hepatobiliary - other                                 | 15 (3%)                                           | 1 (<1%) | 0 (0%)  | 0 (0%)  | 2 (<1%)                                                            | 1 (<1%) | 0 (0%)  | 0 (0%)  | 21 (4%)                                                            | 0 (0%)  | 0 (0%)  | 0 (0%)  | 0 (0%)                                                                                    | 0 (0%)  | 0 (0%)  | 0 (0%)  |
| <b>Immune body system</b>                             |                                                   |         |         |         |                                                                    |         |         |         |                                                                    |         |         |         |                                                                                           |         |         |         |
| Allergic reaction                                     | 18 (4%)                                           | 1 (<1%) | 0 (0%)  | 0 (0%)  | 11 (2%)                                                            | 0 (0%)  | 0 (0%)  | 0 (0%)  | 19 (4%)                                                            | 2 (<1%) | 0 (0%)  | 0 (0%)  | 11 (2%)                                                                                   | 2 (<1%) | 0 (0%)  | 0 (0%)  |
| Immune - other                                        | 0 (0%)                                            | 0 (0%)  | 0 (0%)  | 0 (0%)  | 0 (0%)                                                             | 0 (0%)  | 0 (0%)  | 0 (0%)  | 0 (0%)                                                             | 0 (0%)  | 0 (0%)  | 0 (0%)  | 0 (0%)                                                                                    | 0 (0%)  | 0 (0%)  | 0 (0%)  |
| <b>Infections body system</b>                         |                                                   |         |         |         |                                                                    |         |         |         |                                                                    |         |         |         |                                                                                           |         |         |         |
| Abdominal infection                                   | 0 (0%)                                            | 0 (0%)  | 0 (0%)  | 0 (0%)  | 0 (0%)                                                             | 0 (0%)  | 0 (0%)  | 0 (0%)  | 0 (0%)                                                             | 0 (0%)  | 0 (0%)  | 0 (0%)  | 0 (0%)                                                                                    | 1 (<1%) | 0 (0%)  | 0 (0%)  |
| Lung infection                                        | 0 (0%)                                            | 0 (0%)  | 0 (0%)  | 0 (0%)  | 1 (<1%)                                                            | 1 (<1%) | 0 (0%)  | 1 (<1%) | 0 (0%)                                                             | 0 (0%)  | 0 (0%)  | 0 (0%)  | 0 (0%)                                                                                    | 4 (1%)  | 1 (<1%) | 1 (<1%) |
| Sepsis                                                | 0 (0%)                                            | 0 (0%)  | 0 (0%)  | 0 (0%)  | 0 (0%)                                                             | 0 (0%)  | 0 (0%)  | 0 (0%)  | 0 (0%)                                                             | 0 (0%)  | 0 (0%)  | 0 (0%)  | 0 (0%)                                                                                    | 0 (0%)  | 0 (0%)  | 0 (0%)  |
| Skin infection                                        | 0 (0%)                                            | 0 (0%)  | 0 (0%)  | 0 (0%)  | 0 (0%)                                                             | 0 (0%)  | 0 (0%)  | 0 (0%)  | 0 (0%)                                                             | 0 (0%)  | 0 (0%)  | 0 (0%)  | 0 (0%)                                                                                    | 1 (<1%) | 0 (0%)  | 0 (0%)  |
| Urinary tract infection                               | 34 (7%)                                           | 4 (1%)  | 0 (0%)  | 0 (0%)  | 33 (7%)                                                            | 7 (2%)  | 0 (0%)  | 0 (0%)  | 33 (7%)                                                            | 6 (1%)  | 0 (0%)  | 0 (0%)  | 35 (8%)                                                                                   | 10 (2%) | 1 (<1%) | 1 (<1%) |
| Sinusitis                                             | 9 (2%)                                            | 0 (0%)  | 0 (0%)  | 0 (0%)  | 5 (1%)                                                             | 0 (0%)  | 0 (0%)  | 0 (0%)  | 16 (3%)                                                            | 1 (<1%) | 0 (0%)  | 0 (0%)  | 15 (3%)                                                                                   | 0 (0%)  | 0 (0%)  | 0 (0%)  |
| Upper respiratory infection                           | 37 (7%)                                           | 1 (<1%) | 0 (0%)  | 0 (0%)  | 47 (10%)                                                           | 3 (1%)  | 0 (0%)  | 0 (0%)  | 85 (17%)                                                           | 2 (<1%) | 0 (0%)  | 0 (0%)  | 64 (14%)                                                                                  | 4 (1%)  | 0 (0%)  | 0 (0%)  |
| Lower respiratory infection                           | 3 (1%)                                            | 0 (0%)  | 0 (0%)  | 0 (0%)  | 9 (2%)                                                             | 6 (1%)  | 1 (<1%) | 0 (0%)  | 10 (2%)                                                            | 9 (2%)  | 1 (<1%) | 0 (0%)  | 8 (2%)                                                                                    | 5 (1%)  | 0 (0%)  | 0 (0%)  |
| Infections - other                                    | 0 (0%)                                            | 0 (0%)  | 0 (0%)  | 0 (0%)  | 8 (2%)                                                             | 3 (1%)  | 0 (0%)  | 0 (0%)  | 2 (<1%)                                                            | 0 (0%)  | 0 (0%)  | 1 (<1%) | 0 (0%)                                                                                    | 6 (1%)  | 1 (<1%) | 1 (<1%) |
| <b>Injury, poisoning and procedural complications</b> |                                                   |         |         |         |                                                                    |         |         |         |                                                                    |         |         |         |                                                                                           |         |         |         |
| Fracture                                              | 2 (<1%)                                           | 0 (0%)  | 0 (0%)  | 0 (0%)  | 5 (1%)                                                             | 6 (1%)  | 0 (0%)  | 0 (0%)  | 6 (1%)                                                             | 3 (1%)  | 0 (0%)  | 0 (0%)  | 17 (4%)                                                                                   | 9 (2%)  | 0 (0%)  | 0 (0%)  |
| Injury other                                          | 2 (<1%)                                           | 1 (<1%) | 0 (0%)  | 0 (0%)  | 3 (1%)                                                             | 0 (0%)  | 0 (0%)  | 0 (0%)  | 0 (0%)                                                             | 0 (0%)  | 0 (0%)  | 0 (0%)  | 0 (0%)                                                                                    | 2 (<1%) | 0 (0%)  | 0 (0%)  |

|                                             | Standard of care in the abiraterone trial (n=502) |         |         |         | Standard of care in the abiraterone and enzalutamide trial (n=454) |         |         |         | Standard of care plus abiraterone acetate and prednisolone (n=498) |         |         |         | Standard of care plus abiraterone acetate and prednisolone and enzalutamide trial (n=445) |          |         |         |
|---------------------------------------------|---------------------------------------------------|---------|---------|---------|--------------------------------------------------------------------|---------|---------|---------|--------------------------------------------------------------------|---------|---------|---------|-------------------------------------------------------------------------------------------|----------|---------|---------|
|                                             | Grade 1-2                                         | Grade 3 | Grade 4 | Grade 5 | Grade 1-2                                                          | Grade 3 | Grade 4 | Grade 5 | Grade 1-2                                                          | Grade 3 | Grade 4 | Grade 5 | Grade 1-2                                                                                 | Grade 3  | Grade 4 | Grade 5 |
| <b>Investigations</b>                       |                                                   |         |         |         |                                                                    |         |         |         |                                                                    |         |         |         |                                                                                           |          |         |         |
| ALT increased                               | 65 (13%)                                          | 4 (1%)  | 0 (0%)  | n/a     | 75 (17%)                                                           | 3 (1%)  | 0 (0%)  | n/a     | 107 (21%)                                                          | 26 (5%) | 1 (<1%) | n/a     | 112 (25%)                                                                                 | 44 (10%) | 1 (<1%) | n/a     |
| AST increased                               | 13 (3%)                                           | 2 (<1%) | 0 (0%)  | n/a     | 17 (4%)                                                            | 0 (0%)  | 0 (0%)  | n/a     | 28 (6%)                                                            | 8 (2%)  | 1 (<1%) | n/a     | 43 (10%)                                                                                  | 9 (2%)   | 0 (0%)  | n/a     |
| Cholesterol high                            | 6 (1%)                                            | 0 (0%)  | 0 (0%)  | n/a     | 11 (2%)                                                            | 0 (0%)  | 0 (0%)  | n/a     | 7 (1%)                                                             | 0 (0%)  | 0 (0%)  | n/a     | 0 (0%)                                                                                    | 0 (0%)   | 0 (0%)  | n/a     |
| Creatine increase                           | 0 (0%)                                            | 0 (0%)  | 0 (0%)  | n/a     | 6 (1%)                                                             | 0 (0%)  | 0 (0%)  | n/a     | 4 (1%)                                                             | 0 (0%)  | 0 (0%)  | n/a     | 0 (0%)                                                                                    | 0 (0%)   | 0 (0%)  | n/a     |
| Blood bilirubin increased                   | 2 (<1%)                                           | 1 (<1%) | 0 (0%)  | 0 (0%)  | 7 (2%)                                                             | 0 (0%)  | 0 (0%)  | 0 (0%)  | 10 (2%)                                                            | 4 (1%)  | 0 (0%)  | 0 (0%)  | 22 (5%)                                                                                   | 2 (<1%)  | 0 (0%)  | 0 (0%)  |
| Platelet count decreased                    | 18 (4%)                                           | 1 (<1%) | 0 (0%)  | 0 (0%)  | 31 (7%)                                                            | 1 (<1%) | 1 (<1%) | 0 (0%)  | 24 (5%)                                                            | 1 (<1%) | 0 (0%)  | 0 (0%)  | 24 (5%)                                                                                   | 0 (0%)   | 1 (<1%) | 0 (0%)  |
| Neutrophil count decreased                  | 23 (5%)                                           | 1 (<1%) | 1 (<1%) | 0 (0%)  | 26 (6%)                                                            | 1 (<1%) | 8 (2%)  | 0 (0%)  | 41 (8%)                                                            | 6 (1%)  | 2 (<1%) | 0 (0%)  | 35 (8%)                                                                                   | 4 (1%)   | 4 (1%)  | 0 (0%)  |
| Alkaline phosphatase increased              | 15 (3%)                                           | 1 (<1%) | 0 (0%)  | 0 (0%)  | 52 (11%)                                                           | 6 (1%)  | 0 (0%)  | 0 (0%)  | 26 (5%)                                                            | 1 (<1%) | 0 (0%)  | 0 (0%)  | 48 (11%)                                                                                  | 7 (2%)   | 0 (0%)  | 0 (0%)  |
| Weight gain                                 | 11 (2%)                                           | 0 (0%)  | 0 (0%)  | 0 (0%)  | 47 (10%)                                                           | 1 (<1%) | 0 (0%)  | 0 (0%)  | 24 (5%)                                                            | 3 (1%)  | 0 (0%)  | 0 (0%)  | 46 (10%)                                                                                  | 5 (1%)   | 0 (0%)  | 0 (0%)  |
| Investigations - other                      | 171 (34%)                                         | 13 (3%) | 1 (<1%) | 0 (0%)  | 141 (31%)                                                          | 16 (4%) | 2 (<1%) | 0 (0%)  | 235 (47%)                                                          | 11 (2%) | 2 (<1%) | 0 (0%)  | 166 (37%)                                                                                 | 9 (2%)   | 4 (1%)  | 0 (0%)  |
| <b>Metabolism and nutrition body system</b> |                                                   |         |         |         |                                                                    |         |         |         |                                                                    |         |         |         |                                                                                           |          |         |         |
| Dehydration                                 | 0 (0%)                                            | 0 (0%)  | 0 (0%)  | 0 (0%)  | 0 (0%)                                                             | 0 (0%)  | 0 (0%)  | 0 (0%)  | 0 (0%)                                                             | 0 (0%)  | 0 (0%)  | 0 (0%)  | 0 (0%)                                                                                    | 0 (0%)   | 0 (0%)  | 0 (0%)  |
| Glucose intolerance                         | 19 (4%)                                           | 3 (1%)  | 0 (0%)  | 0 (0%)  | 31 (7%)                                                            | 1 (<1%) | 0 (0%)  | 0 (0%)  | 54 (11%)                                                           | 4 (1%)  | 0 (0%)  | 0 (0%)  | 23 (5%)                                                                                   | 7 (2%)   | 0 (0%)  | 0 (0%)  |
| Hypokalemia                                 | 16 (3%)                                           | 0 (0%)  | 1 (<1%) | 0 (0%)  | 21 (5%)                                                            | 0 (0%)  | 0 (0%)  | 0 (0%)  | 57 (11%)                                                           | 7 (1%)  | 0 (0%)  | 0 (0%)  | 66 (15%)                                                                                  | 7 (2%)   | 2 (<1%) | 0 (0%)  |
| Anorexia                                    | 39 (8%)                                           | 2 (<1%) | 0 (0%)  | 0 (0%)  | 57 (13%)                                                           | 2 (<1%) | 0 (0%)  | 0 (0%)  | 57 (11%)                                                           | 1 (<1%) | 0 (0%)  | 0 (0%)  | 79 (18%)                                                                                  | 3 (1%)   | 0 (0%)  | 0 (0%)  |
| Hypoalbuminaemia                            | 6 (1%)                                            | 0 (0%)  | 0 (0%)  | 0 (0%)  | 22 (5%)                                                            | 0 (0%)  | 0 (0%)  | 0 (0%)  | 13 (3%)                                                            | 0 (0%)  | 0 (0%)  | 0 (0%)  | 0 (0%)                                                                                    | 0 (0%)   | 0 (0%)  | 0 (0%)  |
| Hypercalcaemia                              | 6 (1%)                                            | 0 (0%)  | 0 (0%)  | 0 (0%)  | 22 (5%)                                                            | 0 (0%)  | 0 (0%)  | 0 (0%)  | 13 (3%)                                                            | 0 (0%)  | 0 (0%)  | 0 (0%)  | 0 (0%)                                                                                    | 0 (0%)   | 0 (0%)  | 0 (0%)  |
| Hypertriglyceridaemia                       | 2 (<1%)                                           | 0 (0%)  | 0 (0%)  | 0 (0%)  | 6 (1%)                                                             | 0 (0%)  | 0 (0%)  | 0 (0%)  | 4 (1%)                                                             | 0 (0%)  | 0 (0%)  | 0 (0%)  | 0 (0%)                                                                                    | 2 (<1%)  | 0 (0%)  | 0 (0%)  |
| Hyperphosphataemia                          | 2 (<1%)                                           | 0 (0%)  | 0 (0%)  | 0 (0%)  | 6 (1%)                                                             | 0 (0%)  | 0 (0%)  | 0 (0%)  | 4 (1%)                                                             | 0 (0%)  | 0 (0%)  | 0 (0%)  | 0 (0%)                                                                                    | 2 (<1%)  | 0 (0%)  | 0 (0%)  |
| Metabolism and nutrition - other            | 49 (10%)                                          | 0 (0%)  | 0 (0%)  | 0 (0%)  | 36 (8%)                                                            | 2 (<1%) | 0 (0%)  | 0 (0%)  | 55 (11%)                                                           | 2 (<1%) | 0 (0%)  | 0 (0%)  | 63 (14%)                                                                                  | 0 (0%)   | 2 (<1%) | 0 (0%)  |

|                                               | Standard of care in the abiraterone trial (n=502) |         |         |         | Standard of care in the abiraterone and enzalutamide trial (n=454) |         |         |         | Standard of care plus abiraterone acetate and prednisolone (n=498) |         |         |         | Standard of care plus abiraterone acetate and prednisolone and enzalutamide trial (n=445) |         |         |         |
|-----------------------------------------------|---------------------------------------------------|---------|---------|---------|--------------------------------------------------------------------|---------|---------|---------|--------------------------------------------------------------------|---------|---------|---------|-------------------------------------------------------------------------------------------|---------|---------|---------|
|                                               | Grade 1-2                                         | Grade 3 | Grade 4 | Grade 5 | Grade 1-2                                                          | Grade 3 | Grade 4 | Grade 5 | Grade 1-2                                                          | Grade 3 | Grade 4 | Grade 5 | Grade 1-2                                                                                 | Grade 3 | Grade 4 | Grade 5 |
| <b>Musculoskeletal body system</b>            |                                                   |         |         |         |                                                                    |         |         |         |                                                                    |         |         |         |                                                                                           |         |         |         |
| Bone pain                                     | 194 (39%)                                         | 23 (5%) | 0 (0%)  | 0 (0%)  | 189 (42%)                                                          | 21 (5%) | 0 (0%)  | 0 (0%)  | 197 (40%)                                                          | 22 (4%) | 0 (0%)  | 0 (0%)  | 175 (39%)                                                                                 | 23 (5%) | 0 (0%)  | 0 (0%)  |
| Generalised muscle weakness                   | 0 (0%)                                            | 0 (0%)  | 0 (0%)  | 0 (0%)  | 0 (0%)                                                             | 0 (0%)  | 0 (0%)  | 0 (0%)  | 0 (0%)                                                             | 0 (0%)  | 0 (0%)  | 0 (0%)  | 0 (0%)                                                                                    | 0 (0%)  | 0 (0%)  | 0 (0%)  |
| Osteoporosis                                  | 0 (0%)                                            | 0 (0%)  | n/a     | n/a     | 12 (3%)                                                            | 0 (0%)  | n/a     | n/a     | 8 (2%)                                                             | 0 (0%)  | n/a     | n/a     | 0 (0%)                                                                                    | 1 (<1%) | n/a     | n/a     |
| Back pain                                     | 37 (7%)                                           | 0 (0%)  | 0 (0%)  | 0 (0%)  | 96 (21%)                                                           | 14 (3%) | 0 (0%)  | 0 (0%)  | 59 (12%)                                                           | 7 (1%)  | 0 (0%)  | 0 (0%)  | 120 (27%)                                                                                 | 15 (3%) | 0 (0%)  | 0 (0%)  |
| Arthralgia                                    | 110 (22%)                                         | 6 (1%)  | n/a     | n/a     | 141 (31%)                                                          | 9 (2%)  | n/a     | n/a     | 144 (29%)                                                          | 9 (2%)  | n/a     | n/a     | 172 (39%)                                                                                 | 5 (1%)  | n/a     | n/a     |
| Myalgia                                       | 73 (15%)                                          | 0 (0%)  | n/a     | n/a     | 80 (18%)                                                           | 2 (<1%) | n/a     | n/a     | 108 (22%)                                                          | 0 (0%)  | n/a     | n/a     | 0 (0%)                                                                                    | 1 (<1%) | n/a     | n/a     |
| Musculoskeletal and connective tissue - other | 186 (37%)                                         | 10 (2%) | 2 (<1%) | 0 (0%)  | 140 (31%)                                                          | 12 (3%) | 0 (0%)  | 0 (0%)  | 221 (44%)                                                          | 30 (6%) | 0 (0%)  | 0 (0%)  | 164 (37%)                                                                                 | 22 (5%) | 0 (0%)  | 0 (0%)  |
| <b>Neoplasms</b>                              |                                                   |         |         |         |                                                                    |         |         |         |                                                                    |         |         |         |                                                                                           |         |         |         |
| Neoplasms - other                             | 2 (<1%)                                           | 0 (0%)  | 0 (0%)  | 0 (0%)  | 1 (<1%)                                                            | 2 (<1%) | 0 (0%)  | 1 (<1%) | 0 (0%)                                                             | 0 (0%)  | 0 (0%)  | 0 (0%)  | 0 (0%)                                                                                    | 1 (<1%) | 1 (<1%) | 1 (<1%) |
| <b>Nervous body system</b>                    |                                                   |         |         |         |                                                                    |         |         |         |                                                                    |         |         |         |                                                                                           |         |         |         |
| Concentration impairment                      | 1 (<1%)                                           | 0 (0%)  | n/a     | n/a     | 10 (2%)                                                            | 1 (<1%) | n/a     | n/a     | 0 (0%)                                                             | 0 (0%)  | n/a     | n/a     | 0 (0%)                                                                                    | 0 (0%)  | n/a     | n/a     |
| Dizziness                                     | 50 (10%)                                          | 0 (0%)  | n/a     | n/a     | 57 (13%)                                                           | 0 (0%)  | n/a     | n/a     | 91 (18%)                                                           | 1 (<1%) | n/a     | n/a     | 97 (22%)                                                                                  | 3 (1%)  | n/a     | n/a     |
| Seizure                                       | 1 (<1%)                                           | 0 (0%)  | 0 (0%)  | 0 (0%)  | 1 (<1%)                                                            | 0 (0%)  | 0 (0%)  | 0 (0%)  | 2 (<1%)                                                            | 0 (0%)  | 0 (0%)  | 0 (0%)  | 0 (0%)                                                                                    | 4 (1%)  | 0 (0%)  | 0 (0%)  |
| Stroke                                        | 0 (0%)                                            | 0 (0%)  | 0 (0%)  | 0 (0%)  | 1 (<1%)                                                            | 1 (<1%) | 0 (0%)  | 0 (0%)  | 0 (0%)                                                             | 0 (0%)  | 0 (0%)  | 0 (0%)  | 0 (0%)                                                                                    | 1 (<1%) | 2 (<1%) | 0 (0%)  |
| TIA                                           | 0 (0%)                                            | 0 (0%)  | 0 (0%)  | 0 (0%)  | 0 (0%)                                                             | 0 (0%)  | 0 (0%)  | 0 (0%)  | 0 (0%)                                                             | 0 (0%)  | 0 (0%)  | 0 (0%)  | 0 (0%)                                                                                    | 0 (0%)  | 0 (0%)  | 0 (0%)  |
| Cognitive disturbance                         | 18 (4%)                                           | 1 (<1%) | 0 (0%)  | 0 (0%)  | 22 (5%)                                                            | 2 (<1%) | 0 (0%)  | 0 (0%)  | 33 (7%)                                                            | 3 (1%)  | 0 (0%)  | 0 (0%)  | 83 (19%)                                                                                  | 2 (<1%) | 1 (<1%) | 0 (0%)  |
| Headache                                      | 52 (10%)                                          | 1 (<1%) | 0 (0%)  | 0 (0%)  | 53 (12%)                                                           | 2 (<1%) | 0 (0%)  | 0 (0%)  | 90 (18%)                                                           | 7 (1%)  | 0 (0%)  | 0 (0%)  | 110 (25%)                                                                                 | 5 (1%)  | 0 (0%)  | 0 (0%)  |
| Nervous system - other                        | 42 (8%)                                           | 7 (1%)  | 6 (1%)  | 1 (<1%) | 69 (15%)                                                           | 11 (2%) | 1 (<1%) | 0 (0%)  | 75 (15%)                                                           | 12 (2%) | 3 (1%)  | 2 (<1%) | 110 (25%)                                                                                 | 9 (2%)  | 3 (1%)  | 0 (0%)  |
| <b>Psychiatric body system</b>                |                                                   |         |         |         |                                                                    |         |         |         |                                                                    |         |         |         |                                                                                           |         |         |         |
| Anxiety                                       | 15 (3%)                                           | 0 (0%)  | 1 (<1%) | 0 (0%)  | 50 (11%)                                                           | 2 (<1%) | 0 (0%)  | 0 (0%)  | 40 (8%)                                                            | 0 (0%)  | 0 (0%)  | 0 (0%)  | 0 (0%)                                                                                    | 0 (0%)  | 1 (<1%) | 0 (0%)  |
| Depression                                    | 14 (3%)                                           | 0 (0%)  | 1 (<1%) | 0 (0%)  | 58 (13%)                                                           | 0 (0%)  | 0 (0%)  | 0 (0%)  | 40 (8%)                                                            | 1 (<1%) | 0 (0%)  | 0 (0%)  | 82 (18%)                                                                                  | 0 (0%)  | 1 (<1%) | 0 (0%)  |
| Insomnia                                      | 101 (20%)                                         | 5 (1%)  | n/a     | n/a     | 144 (32%)                                                          | 3 (1%)  | n/a     | n/a     | 149 (30%)                                                          | 6 (1%)  | n/a     | n/a     | 149 (33%)                                                                                 | 0 (0%)  | n/a     | n/a     |
| Libido decreased                              | 1 (<1%)                                           | n/a     | n/a     | n/a     | 24 (5%)                                                            | n/a     | n/a     | n/a     | 2 (<1%)                                                            | n/a     | n/a     | n/a     | 0 (0%)                                                                                    | n/a     | n/a     | n/a     |

|                                             | Standard of care in the abiraterone trial (n=502) |          |         |         | Standard of care in the abiraterone and enzalutamide trial (n=454) |          |         |         | Standard of care plus abiraterone acetate and prednisolone (n=498) |          |         |         | Standard of care plus abiraterone acetate and prednisolone and enzalutamide trial (n=445) |          |         |         |
|---------------------------------------------|---------------------------------------------------|----------|---------|---------|--------------------------------------------------------------------|----------|---------|---------|--------------------------------------------------------------------|----------|---------|---------|-------------------------------------------------------------------------------------------|----------|---------|---------|
|                                             | Grade 1-2                                         | Grade 3  | Grade 4 | Grade 5 | Grade 1-2                                                          | Grade 3  | Grade 4 | Grade 5 | Grade 1-2                                                          | Grade 3  | Grade 4 | Grade 5 | Grade 1-2                                                                                 | Grade 3  | Grade 4 | Grade 5 |
| Psychiatric - other                         | 70 (14%)                                          | 3 (1%)   | 1 (<1%) | 0 (0%)  | 58 (13%)                                                           | 1 (<1%)  | 0 (0%)  | 0 (0%)  | 112 (22%)                                                          | 4 (1%)   | 0 (0%)  | 0 (0%)  | 83 (19%)                                                                                  | 3 (1%)   | 0 (0%)  | 0 (0%)  |
| <b>Renal and urinary disorders</b>          |                                                   |          |         |         |                                                                    |          |         |         |                                                                    |          |         |         |                                                                                           |          |         |         |
| Acute kidney injury                         | 7 (1%)                                            | 3 (1%)   | 1 (<1%) | 0 (0%)  | 22 (5%)                                                            | 1 (<1%)  | 1 (<1%) | 0 (0%)  | 10 (2%)                                                            | 1 (<1%)  | 1 (<1%) | 0 (0%)  | 19 (4%)                                                                                   | 2 (<1%)  | 1 (<1%) | 2 (<1%) |
| Haematuria                                  | 26 (5%)                                           | 2 (<1%)  | 0 (0%)  | 0 (0%)  | 17 (4%)                                                            | 3 (1%)   | 0 (0%)  | 0 (0%)  | 34 (7%)                                                            | 2 (<1%)  | 0 (0%)  | 0 (0%)  | 19 (4%)                                                                                   | 3 (1%)   | 0 (0%)  | 0 (0%)  |
| Renal calculi                               | 0 (0%)                                            | 0 (0%)   | 0 (0%)  | 0 (0%)  | 0 (0%)                                                             | 0 (0%)   | 0 (0%)  | 0 (0%)  | 0 (0%)                                                             | 0 (0%)   | 0 (0%)  | 0 (0%)  | 0 (0%)                                                                                    | 1 (<1%)  | 0 (0%)  | 0 (0%)  |
| Urinary frequency                           | 272 (54%)                                         | n/a      | n/a     | n/a     | 271 (60%)                                                          | n/a      | n/a     | n/a     | 301 (60%)                                                          | n/a      | n/a     | n/a     | 0 (0%)                                                                                    | n/a      | n/a     | n/a     |
| Urinary tract obstruction                   | 3 (1%)                                            | 2 (<1%)  | 0 (0%)  | 0 (0%)  | 10 (2%)                                                            | 3 (1%)   | 1 (<1%) | 0 (0%)  | 8 (2%)                                                             | 2 (<1%)  | 0 (0%)  | 0 (0%)  | 9 (2%)                                                                                    | 2 (<1%)  | 2 (<1%) | 0 (0%)  |
| Chronic kidney disease                      | 47 (9%)                                           | 3 (1%)   | 0 (0%)  | 0 (0%)  | 42 (9%)                                                            | 4 (1%)   | 1 (<1%) | 0 (0%)  | 41 (8%)                                                            | 2 (<1%)  | 0 (0%)  | 0 (0%)  | 37 (8%)                                                                                   | 3 (1%)   | 0 (0%)  | 0 (0%)  |
| Urinary urgency                             | 30 (6%)                                           | 0 (0%)   | 0 (0%)  | 0 (0%)  | 86 (19%)                                                           | 0 (0%)   | 0 (0%)  | 0 (0%)  | 39 (8%)                                                            | 0 (0%)   | 0 (0%)  | 0 (0%)  | 0 (0%)                                                                                    | 0 (0%)   | 0 (0%)  | 0 (0%)  |
| Renal and urinary - other                   | 79 (16%)                                          | 12 (2%)  | 0 (0%)  | 0 (0%)  | 66 (15%)                                                           | 14 (3%)  | 2 (<1%) | 0 (0%)  | 73 (15%)                                                           | 16 (3%)  | 0 (0%)  | 0 (0%)  | 77 (17%)                                                                                  | 17 (4%)  | 2 (<1%) | 0 (0%)  |
| <b>Reproductive system</b>                  |                                                   |          |         |         |                                                                    |          |         |         |                                                                    |          |         |         |                                                                                           |          |         |         |
| Erectile dysfunction                        | 165 (33%)                                         | 59 (12%) | 0 (0%)  | 0 (0%)  | 161 (35%)                                                          | 56 (12%) | 0 (0%)  | 0 (0%)  | 201 (40%)                                                          | 63 (13%) | 0 (0%)  | 0 (0%)  | 177 (40%)                                                                                 | 76 (17%) | 0 (0%)  | 0 (0%)  |
| Gynecomastia                                | 51 (10%)                                          | 1 (<1%)  | n/a     | n/a     | 87 (19%)                                                           | 2 (<1%)  | n/a     | n/a     | 69 (14%)                                                           | 0 (0%)   | n/a     | n/a     | 0 (0%)                                                                                    | 3 (1%)   | n/a     | n/a     |
| Reproductive - other                        | 0 (0%)                                            | 0 (0%)   | 0 (0%)  | 0 (0%)  | 3 (1%)                                                             | 0 (0%)   | 0 (0%)  | 0 (0%)  | 0 (0%)                                                             | 0 (0%)   | 0 (0%)  | 0 (0%)  | 0 (0%)                                                                                    | 0 (0%)   | 0 (0%)  | 0 (0%)  |
| <b>Respiratory thoracic and mediastinal</b> |                                                   |          |         |         |                                                                    |          |         |         |                                                                    |          |         |         |                                                                                           |          |         |         |
| Cough                                       | 63 (13%)                                          | 0 (0%)   | 0 (0%)  | 0 (0%)  | 101 (22%)                                                          | 2 (<1%)  | 0 (0%)  | 0 (0%)  | 157 (32%)                                                          | 1 (<1%)  | 0 (0%)  | 0 (0%)  | 95 (21%)                                                                                  | 0 (0%)   | 0 (0%)  | 0 (0%)  |
| Breathlessness                              | 84 (17%)                                          | 5 (1%)   | 0 (0%)  | 0 (0%)  | 113 (25%)                                                          | 6 (1%)   | 2 (<1%) | 0 (0%)  | 147 (30%)                                                          | 7 (1%)   | 2 (<1%) | 0 (0%)  | 136 (31%)                                                                                 | 4 (1%)   | 0 (0%)  | 0 (0%)  |
| Wheezing                                    | 0 (0%)                                            | 0 (0%)   | 0 (0%)  | 0 (0%)  | 0 (0%)                                                             | 0 (0%)   | 0 (0%)  | 0 (0%)  | 0 (0%)                                                             | 0 (0%)   | 0 (0%)  | 0 (0%)  | 0 (0%)                                                                                    | 0 (0%)   | 0 (0%)  | 0 (0%)  |
| Allergic rhinitis                           | 17 (3%)                                           | 0 (0%)   | 0 (0%)  | 0 (0%)  | 20 (4%)                                                            | 0 (0%)   | 0 (0%)  | 0 (0%)  | 40 (8%)                                                            | 0 (0%)   | 0 (0%)  | 0 (0%)  | 0 (0%)                                                                                    | 0 (0%)   | 0 (0%)  | 0 (0%)  |
| Respiratory - other                         | 20 (4%)                                           | 7 (1%)   | 0 (0%)  | 1 (<1%) | 22 (5%)                                                            | 5 (1%)   | 1 (<1%) | 0 (0%)  | 73 (15%)                                                           | 7 (1%)   | 1 (<1%) | 4 (1%)  | 54 (12%)                                                                                  | 9 (2%)   | 1 (<1%) | 1 (<1%) |

|                                     | Standard of care in the abiraterone trial (n=502) |         |         |         | Standard of care in the abiraterone and enzalutamide trial (n=454) |         |         |         | Standard of care plus abiraterone acetate and prednisolone (n=498) |         |         |         | Standard of care plus abiraterone acetate and prednisolone and enzalutamide trial (n=445) |          |         |         |
|-------------------------------------|---------------------------------------------------|---------|---------|---------|--------------------------------------------------------------------|---------|---------|---------|--------------------------------------------------------------------|---------|---------|---------|-------------------------------------------------------------------------------------------|----------|---------|---------|
|                                     | Grade 1-2                                         | Grade 3 | Grade 4 | Grade 5 | Grade 1-2                                                          | Grade 3 | Grade 4 | Grade 5 | Grade 1-2                                                          | Grade 3 | Grade 4 | Grade 5 | Grade 1-2                                                                                 | Grade 3  | Grade 4 | Grade 5 |
| <b>Skin and subcutaneous tissue</b> |                                                   |         |         |         |                                                                    |         |         |         |                                                                    |         |         |         |                                                                                           |          |         |         |
| Alopecia                            | 3 (1%)                                            | n/a     | n/a     | n/a     | 9 (2%)                                                             | n/a     | n/a     | n/a     | 3 (1%)                                                             | n/a     | n/a     | n/a     | 0 (0%)                                                                                    | n/a      | n/a     | n/a     |
| Pruritus                            | 0 (0%)                                            | 0 (0%)  | n/a     | n/a     | 4 (1%)                                                             | 0 (0%)  | n/a     | n/a     | 0 (0%)                                                             | 0 (0%)  | n/a     | n/a     | 0 (0%)                                                                                    | 0 (0%)   | n/a     | n/a     |
| Nail loss/dicolouration             | 25 (5%)                                           | 0 (0%)  | 0 (0%)  | 0 (0%)  | 36 (8%)                                                            | 0 (0%)  | 0 (0%)  | 0 (0%)  | 33 (7%)                                                            | 0 (0%)  | 0 (0%)  | 0 (0%)  | 0 (0%)                                                                                    | 0 (0%)   | 0 (0%)  | 0 (0%)  |
| Rash maculo-papular                 | 39 (8%)                                           | 0 (0%)  | 0 (0%)  | 0 (0%)  | 47 (10%)                                                           | 0 (0%)  | 0 (0%)  | 0 (0%)  | 74 (15%)                                                           | 2 (<1%) | 0 (0%)  | 0 (0%)  | 49 (11%)                                                                                  | 0 (0%)   | 0 (0%)  | 0 (0%)  |
| Skin hypopigmentation               | 0 (0%)                                            | 0 (0%)  | 0 (0%)  | 0 (0%)  | 2 (<1%)                                                            | 0 (0%)  | 0 (0%)  | 0 (0%)  | 0 (0%)                                                             | 0 (0%)  | 0 (0%)  | 0 (0%)  | 0 (0%)                                                                                    | 0 (0%)   | 0 (0%)  | 0 (0%)  |
| Skin - other                        | 72 (14%)                                          | 5 (1%)  | 0 (0%)  | 0 (0%)  | 67 (15%)                                                           | 4 (1%)  | 1 (<1%) | 0 (0%)  | 127 (26%)                                                          | 11 (2%) | 1 (<1%) | 0 (0%)  | 114 (26%)                                                                                 | 3 (1%)   | 1 (<1%) | 0 (0%)  |
| <b>Social body system</b>           |                                                   |         |         |         |                                                                    |         |         |         |                                                                    |         |         |         |                                                                                           |          |         |         |
| Social - other                      | 1 (<1%)                                           | 0 (0%)  | 0 (0%)  | 0 (0%)  | 1 (<1%)                                                            | 0 (0%)  | 0 (0%)  | 0 (0%)  | 0 (0%)                                                             | 0 (0%)  | 0 (0%)  | 0 (0%)  | 0 (0%)                                                                                    | 0 (0%)   | 0 (0%)  | 0 (0%)  |
| <b>Surgical body system</b>         |                                                   |         |         |         |                                                                    |         |         |         |                                                                    |         |         |         |                                                                                           |          |         |         |
| Surgical - other                    | 0 (0%)                                            | 0 (0%)  | 0 (0%)  | 0 (0%)  | 0 (0%)                                                             | 1 (<1%) | 1 (<1%) | 0 (0%)  | 0 (0%)                                                             | 0 (0%)  | 0 (0%)  | 0 (0%)  | 0 (0%)                                                                                    | 0 (0%)   | 0 (0%)  | 0 (0%)  |
| <b>Vascular body system</b>         |                                                   |         |         |         |                                                                    |         |         |         |                                                                    |         |         |         |                                                                                           |          |         |         |
| Hypertension                        | 58 (12%)                                          | 6 (1%)  | 0 (0%)  | 0 (0%)  | 60 (13%)                                                           | 12 (3%) | 0 (0%)  | 0 (0%)  | 161 (32%)                                                          | 26 (5%) | 0 (0%)  | 0 (0%)  | 187 (42%)                                                                                 | 69 (16%) | 0 (0%)  | 0 (0%)  |
| Thromboembolic event                | 2 (<1%)                                           | 1 (<1%) | 0 (0%)  | 0 (0%)  | 3 (1%)                                                             | 0 (0%)  | 1 (<1%) | 0 (0%)  | 0 (0%)                                                             | 0 (0%)  | 0 (0%)  | 0 (0%)  | 0 (0%)                                                                                    | 0 (0%)   | 1 (<1%) | 0 (0%)  |
| Hot flashes                         | 384 (76%)                                         | 20 (4%) | n/a     | n/a     | 365 (80%)                                                          | 12 (3%) | n/a     | n/a     | 406 (82%)                                                          | 25 (5%) | n/a     | n/a     | 374 (84%)                                                                                 | 24 (5%)  | n/a     | n/a     |
| Hypotension                         | 7 (1%)                                            | 1 (<1%) | 0 (0%)  | 0 (0%)  | 8 (2%)                                                             | 1 (<1%) | 0 (0%)  | 0 (0%)  | 23 (5%)                                                            | 2 (<1%) | 0 (0%)  | 0 (0%)  | 16 (4%)                                                                                   | 3 (1%)   | 0 (0%)  | 0 (0%)  |
| <b>Cardiovascular*</b>              |                                                   |         |         |         |                                                                    |         |         |         |                                                                    |         |         |         |                                                                                           |          |         |         |
| Cardiovascular - other              | 23 (5%)                                           | 7 (1%)  | 1 (<1%) | 0 (0%)  | 12 (3%)                                                            | 6 (1%)  | 2 (<1%) | 0 (0%)  | 37 (7%)                                                            | 12 (2%) | 3 (1%)  | 0 (0%)  | 19 (4%)                                                                                   | 8 (2%)   | 4 (1%)  | 2 (<1%) |

\* events reported on Toxicity and SAE CRFs are now categorised by body system according to CTCAE v4.03, which includes separate 'cardiac disorder' and 'vascular disorder' categories. Prior to Nov-2018, toxicities could only be categorised into a single 'cardiovascular disorders' body system. Events that were previously categorised as 'cardiovascular' and attributed to specific toxicities (e.g. heart failure) have been reassigned to the relevant body system under CTCAE v4.03. However, it has not been possible to reassign toxicities that were previously classified as 'cardiovascular – other'. These are presented within the old 'cardiovascular' body system.

**Table S7.** Serious adverse reactions (SAR) and suspected unexpected serious adverse reactions (SUSAR). Cardiac were the most common SAR/SUSAR type: included in further break-down of attribution.

|                          | <b>SOC, Abi trial</b> | <b>SOC, Enz + Abi trial</b> | <b>SOC + Abi</b> | <b>SOC + Abi +Enz</b> |
|--------------------------|-----------------------|-----------------------------|------------------|-----------------------|
| <b>Total SAR/SUSAR</b>   | 5                     | 5                           | 27               | 16                    |
| <b>Cardiac SAR/SUSAR</b> | 2                     | 1                           | 12               | 6                     |
| <b>Fatal SUSAR</b>       | 0                     | 0                           | 0                | 2*                    |

\*Both fatal SUSARS were attributed to a cardiac cause.

SOC, standard-of-care, Abi, abiraterone acetate and prednisolone; Enz, enzalutamide

**Figure S1.** Trials in the STAMPEDE platform protocol that recruited metastatic patients contemporaneously with or prior to the abiraterone or abiraterone and enzalutamide trials.

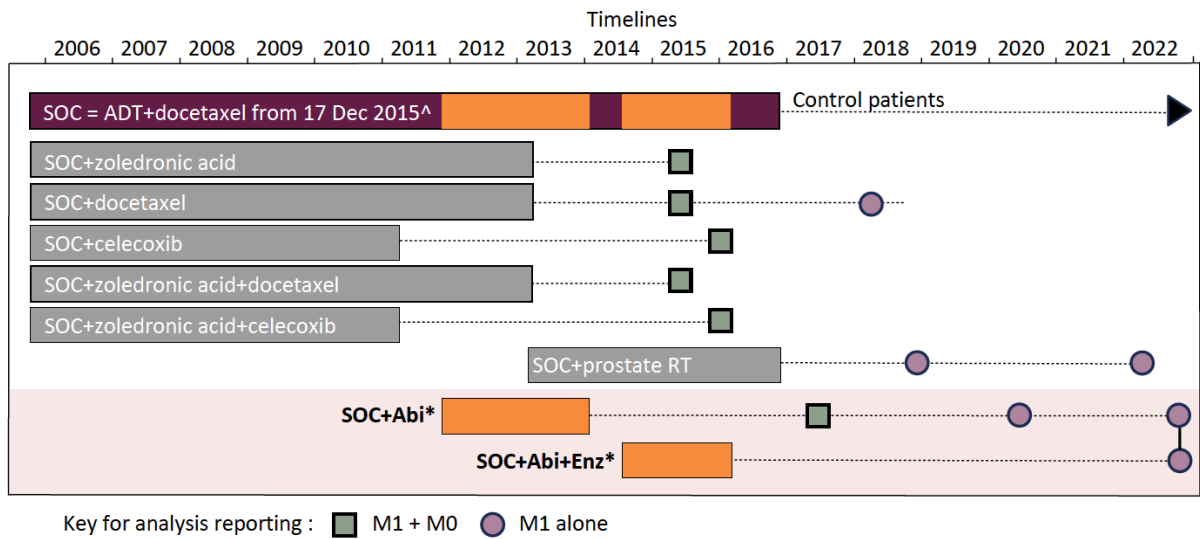

Period of accrual denoted by solid bars. Analysis timelines denoted by dotted lines and analysis reporting by symbols in key. SOC, standard of care; ADT, androgen deprivation therapy; Abi, abiraterone acetate and prednisolone; Enz, enzalutamide; M0, non-metastatic; M1 metastatic; <sup>^</sup>when indicated; \*meta-analysed trials



**Figure S2.** Weeks from randomisation to starting allocated research treatments.

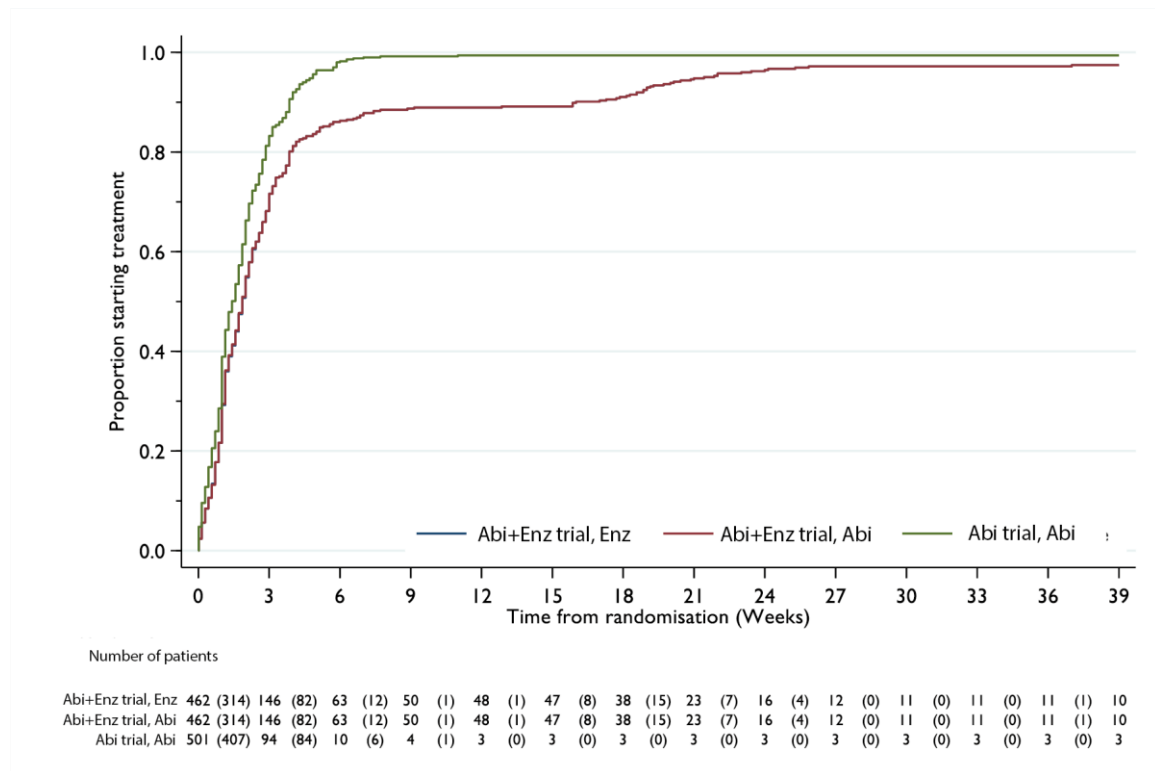

Note: Enzalutamide (blue) line is under abiraterone (red line) given in abi+enz trial. Abi, abiraterone acetate and prednisolone; enz, enzalutamide

**Figure S3.** Treatment effect on survival over time. Flexible parametric models used to calculate changes in treatment effect over time in the abiraterone trial (A, B) and abiraterone and enzalutamide trial (C, D).

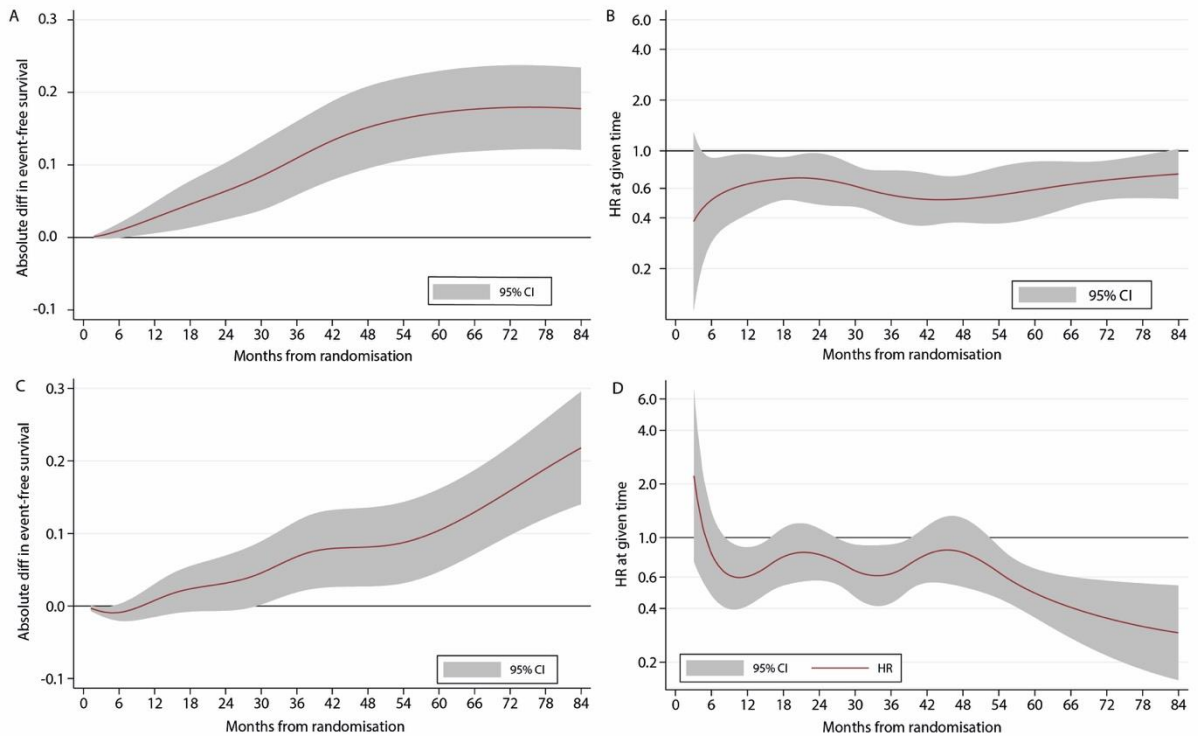

**Figure S4.** Failure-free survival split by low (A) and high (B) volume in the abiraterone trial and low (C) and high (D) volume in the abiraterone and enzalutamide trial.

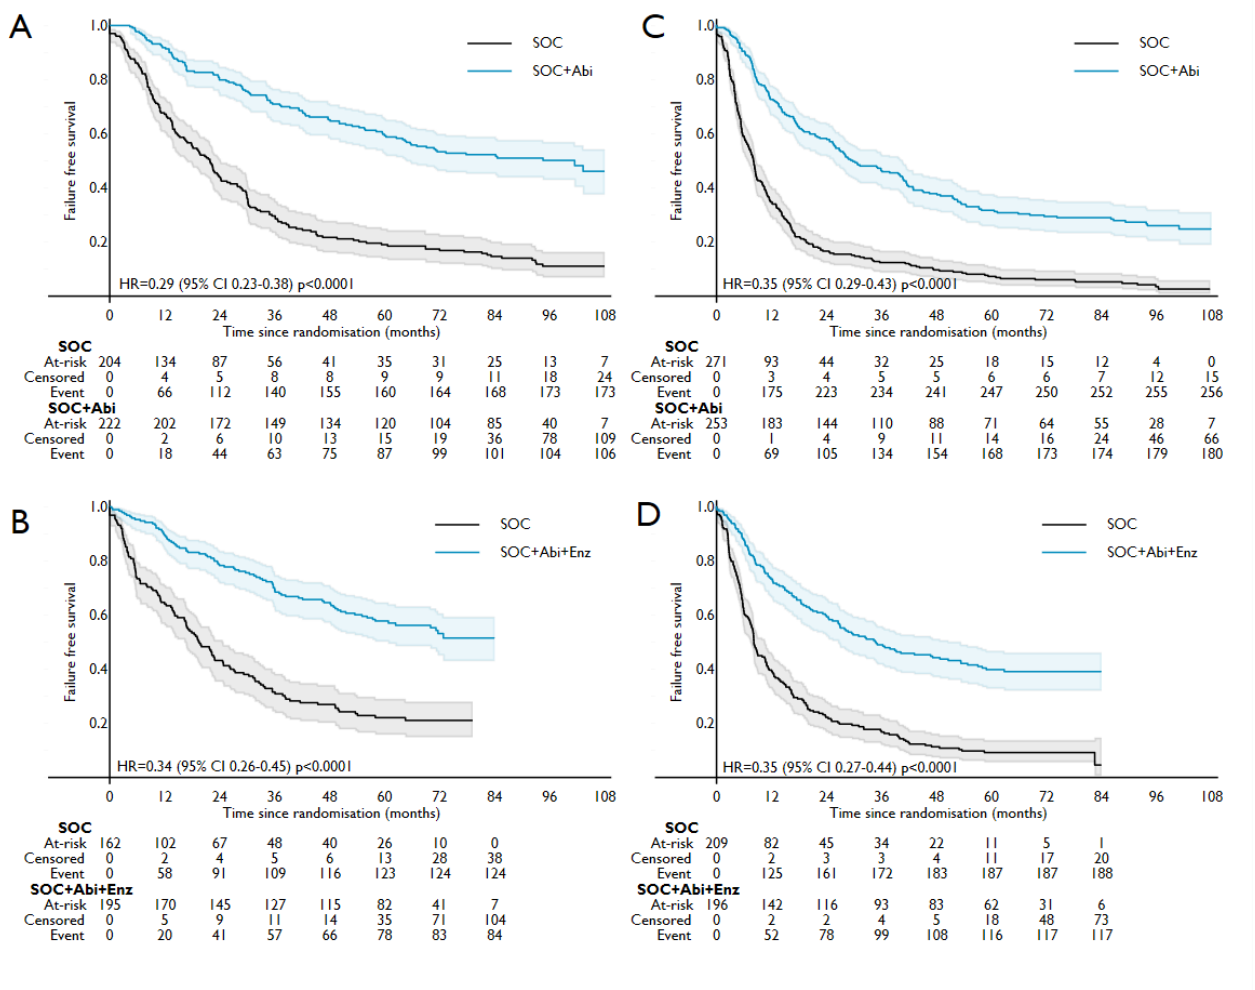

SOC, standard-of-care, Abi, abiraterone acetate and prednisolone; Enz, enzalutamide

**Figure S5.** Progression-free survival in the abiraterone (A) and abiraterone and enzalutamide (B) trials.

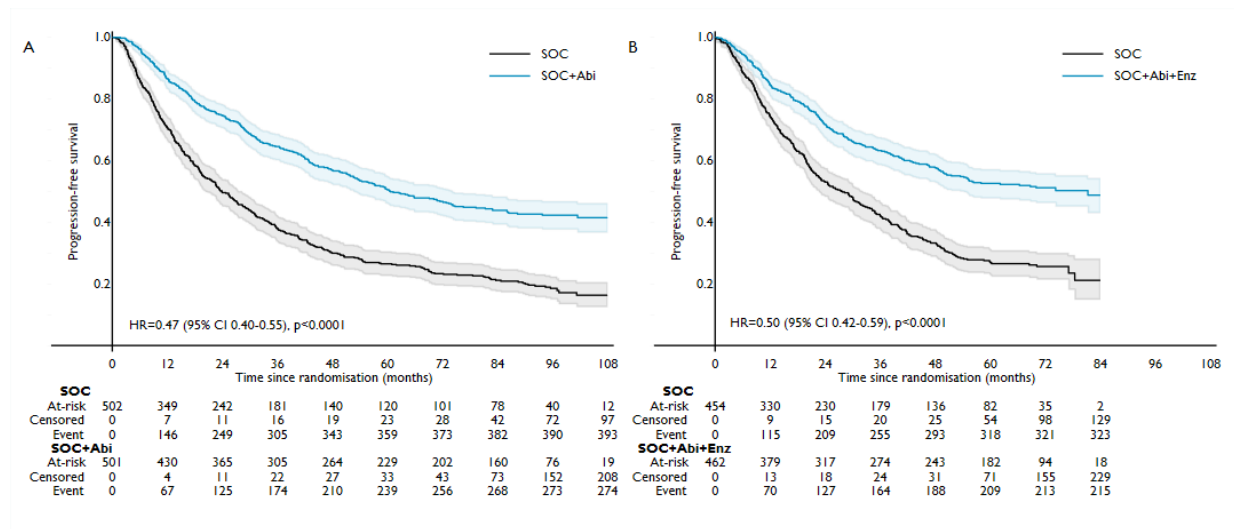

SOC, standard-of-care, Abi, abiraterone acetate and prednisolone; Enz, enzalutamide

**Figure S6.** Symptomatic skeletal-related events in the abiraterone (A) and abiraterone and enzalutamide (B) trials.

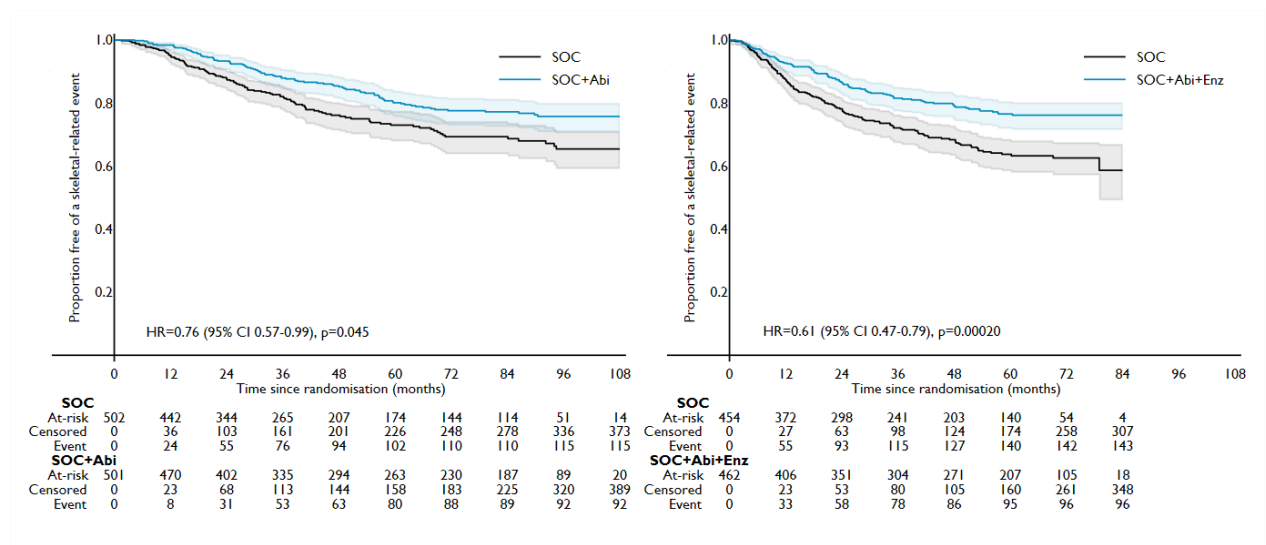

Reporting of skeletal-related event was updated to distinguish by whether this constituted progression or not in STAMPEDE protocol version 12 implemented July 29, 2014, leading to reporting of relatively more events in the abiraterone and enzalutamide trial.

SOC, standard-of-care, Abi, abiraterone acetate and prednisolone; Enz, enzalutamide

**Figure S7.** First life-prolonging treatment administered after progression. Proportion of patients for whom administration of a life-prolonging treatment was reported are included. Life-prolonging treatments used in clinical practice at time of report: abiraterone, enzalutamide, docetaxel, radium(223), cabazitaxel.

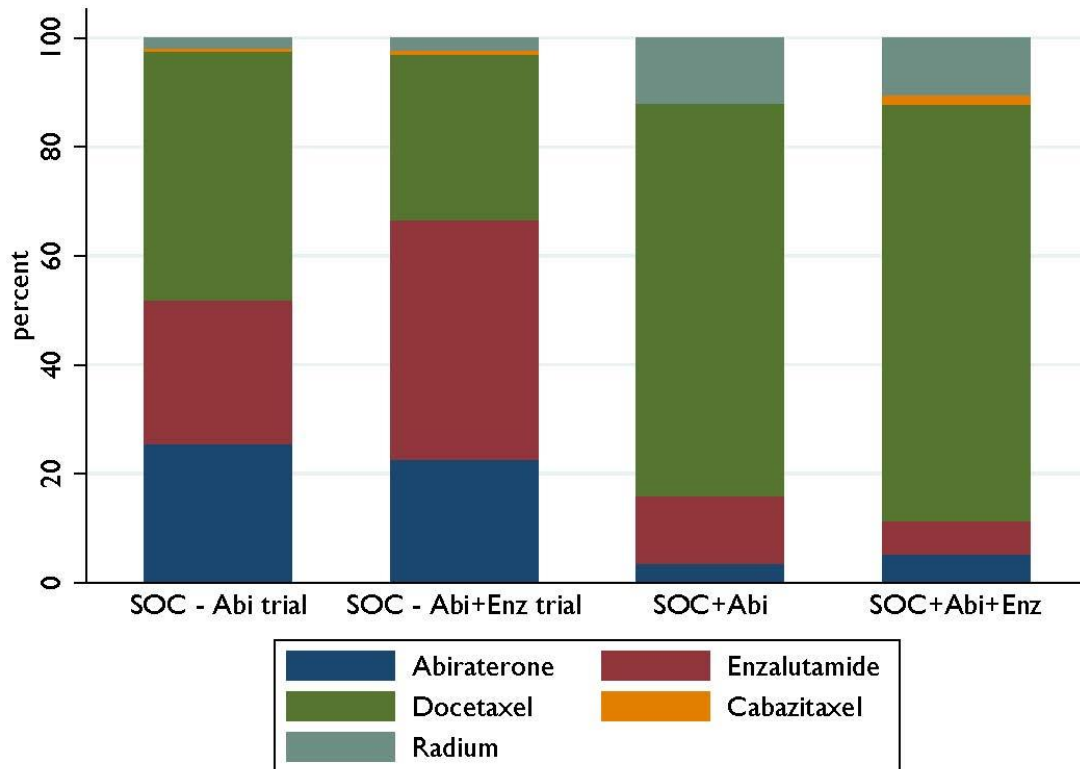

SOC, standard-of-care, Abi, abiraterone acetate and prednisolone; Enz, enzalutamide

**Figure S8.** Time from starting to permanently stopping research treatments. All patients are included, those reported stopping are censored at time of last contact

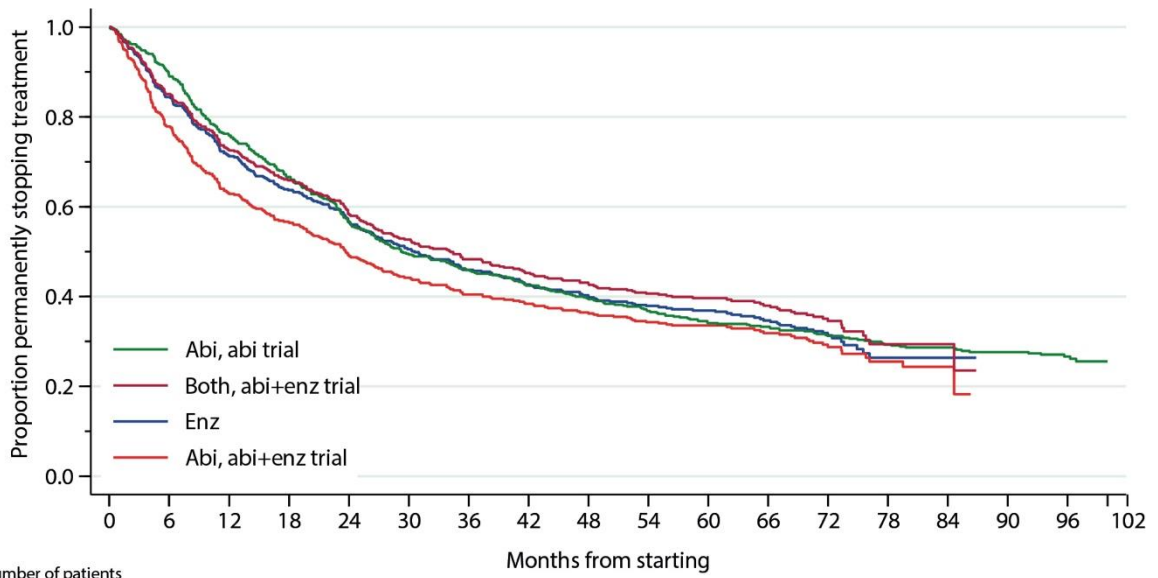

Abi, abiraterone acetate and prednisolone; Enz, enzalutamide

**Figure S9.** Adverse events. **A** Time from treatment start to reporting of grade 3-5 toxicity split by treatment allocation. **B** Adverse events of special interest split by treatment allocation. Also, one grade 4 ALT increase and one grade 4 AST increase with abiraterone acetate and prednisolone and one grade 4 ALT increase with abiraterone acetate and prednisolone and enzalutamide. STAMPEDE protocol v15 implemented 15 May 2016 updated reporting from CTCAE version 3 to CTCAE version 4. This could result in capture of more events in patients randomised nearer this date. Rates can be compared for directly randomised patients (intra-trial) and not inter-trial.

SOC, standard-of-care; abi, abiraterone acetate and prednisolone; enz, enzalutamide.

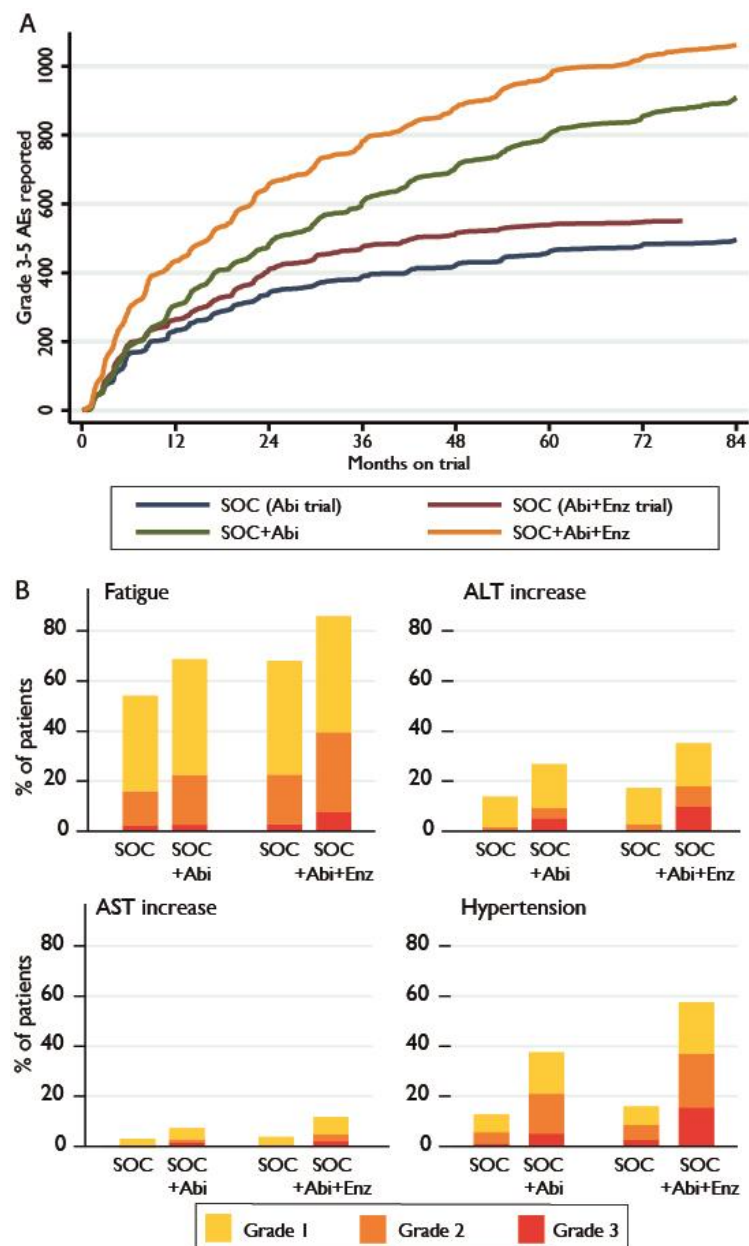



**Figure S10.** Grade 5 adverse events

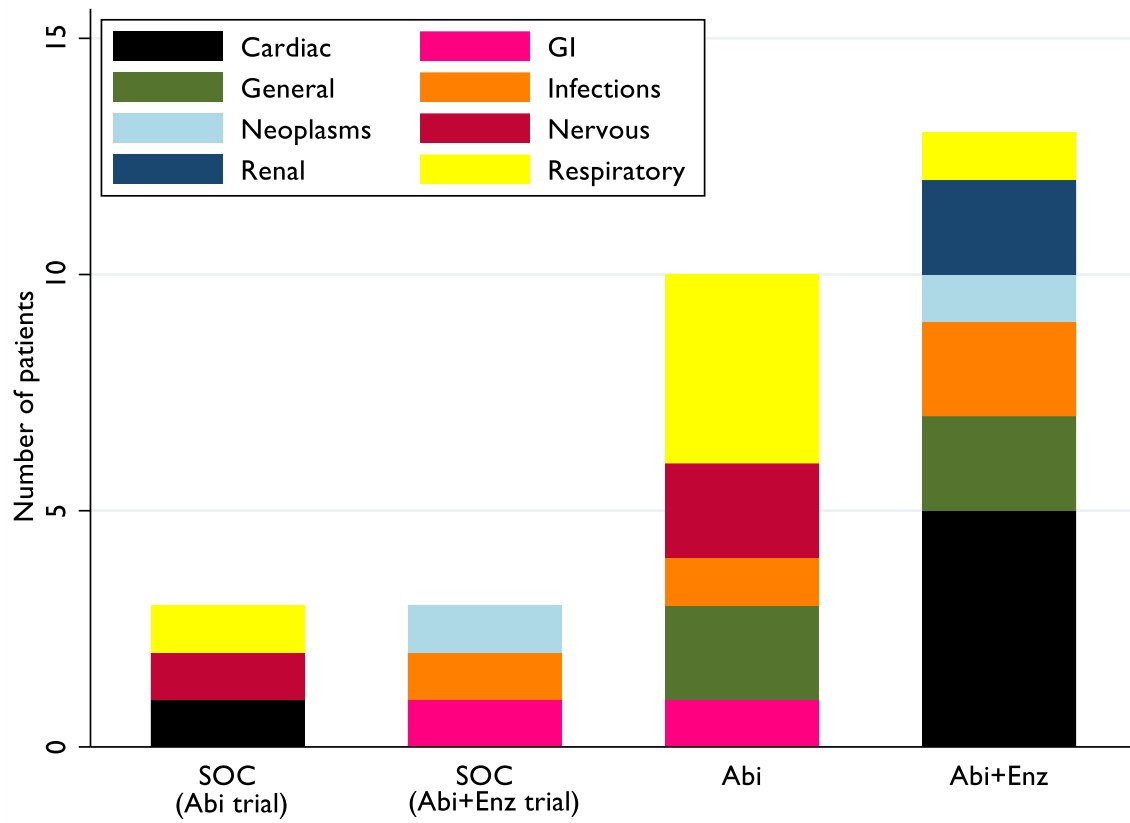

SOC, standard-of-care; Abi, abiraterone acetate and prednisolone; Enz, enzalutamide

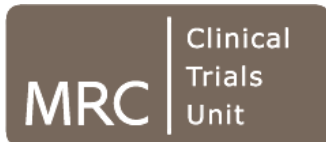

## STAMPEDE

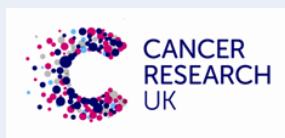

### Systemic Therapy in Advancing or Metastatic Prostate Cancer: Evaluation of Drug Efficacy

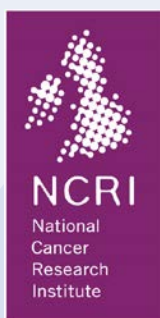

A multi-arm multi-stage randomised controlled trial

**Version:** 21.0  
**Date:** 20 October 2020

**MRC CTU AT UCL ID:** PR08  
**ISRCTN #:** ISRCTN78818544  
**NCT #:** NCT00268476  
**EUDRACT #:** 2004-000193-31  
**CTA #:** 20363/0404/001  
**MREC #:** 04/MRE07/35

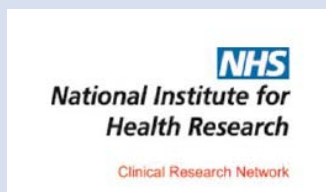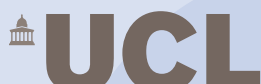

**Authorised by:**  
**Name:** Professor Nicholas D James  
**Role:** Chief Investigator & Comparison CI for "Abiraterone comparison"

**Signature:** 

**Name:** Professor Louise Brown  
**Role:** Trial Statistician  
**Signature:** 

**Authorised by:**

**Name:** PROFESSOR CHRIS PARKER  
**Role:** CCI "M1 | RT COMPARISON"  
**Signature:**

**Name:** PROFESSOR GERTHARDT ATTARD  
**Role:** CCI "ENZALUTAMIDE & ABIRATERONE COMPARISON"  
**Signature:**

**Name:** PROFESSOR NOEL CLARKE  
**Role:** CO-CCI "METFORMIN COMPARISON"  
**Signature:**

**Name:** PROFESSOR SILKE GILLESSEN  
**Role:** CO-CCI "METFORMIN COMPARISON"  
**Signature:**

**Name:** PROFESSOR RUTH LANGLEY  
**Role:** CCI "TRANSDERMAL OESTRADIOL COMPARISON"  
**Signature:**

## GENERAL INFORMATION

This document was constructed using the MRC CTU at UCL Protocol Template Version 4.0. It describes the STAMPEDE trial, coordinated by the Medical Research Council (MRC) Clinical Trials Unit (CTU) at University College London (UCL), and provides information about procedures for entering patients into it. The protocol should not be used as an aide-memoire or guide for the treatment of other patients. Every care has been taken in drafting this protocol, but corrections or amendments may be necessary. These will be circulated to the registered investigators in the trial, but sites entering patients for the first time are advised to contact the Cancer And Other Non-Infectious Diseases Group, MRC CTU at UCL, London, UK, to confirm they have the most up-to-date version.

## COMPLIANCE

The trial will be conducted in compliance with the approved protocol, the Declaration of Helsinki 1996, the principles of Good Clinical Practice (GCP), Commission Directive 2005/28/EC with the implementation in national legislation in the UK by Statutory Instrument 2004/1031 and subsequent amendments, the UK Data Protection Act (DPA number: Z6364106), and the National Health Service (NHS) Research Governance Framework for Health and Social Care (RGF).

\*Until the Clinical Trials Regulation EU No 536/2014 becomes applicable, the trial will be conducted in accordance with the Clinical Trials Directive as implemented in the UK statutory instrument. When the directive is repealed on the day of entry into application of the Clinical Trial Regulation the trial will work towards implementation of the Regulation (536/2014) following any transition period.

International sites will comply with the principles of GCP as laid down by the ICH topic E6 (Note for Guidance on GCP), Commission Directive 2005/28/EC (the European Directive 2001/20/EC [where applicable]) and applicable national regulations.

## SPONSOR

UCL is the sponsor of STAMPEDE and MRC CTU has been delegated responsibility for the overall management of STAMPEDE. Queries relating to UCL sponsorship should be addressed to the Director, Professor Max Parmar, Institute of Clinical Trials & Methodology, MRC CTU at UCL, 2nd Floor, 90 High Holborn, London, WC1V 6LJ UK, or via the STAMPEDE Trial Team.

## FUNDING

Cancer Research UK's Clinical Research Committee (formerly the Clinical Trials Advisory Awards Committee), Medical Research Council, and educational grants from Novartis, Sanofi-Aventis, Pfizer, Janssen Pharma NV, Astellas, Clovis Oncology.

## AUTHORISATIONS AND APPROVALS

The following persons are authorised to sign the final protocol and protocol amendments for the sponsor: Chief Investigator and Trial Statistician and the Co-Chief-investigators for each comparison subsequently added.

## TRIAL REGISTRATION

This trial has been registered with the ClinicalTrials.gov Clinical Trials Register, where it is identified as NCT00268476.

### RANDOMISATION

Call MRC CTU at UCL, Monday to Friday 0900-1700  
Excluding public holidays or dates when notice has been given by the Unit.  
Tel: +44 (0) 20 7670 4777

### SAE REPORTING

**Fax** to 020 7670 4818 within 24 hours of becoming aware of the event  
Or send via **encrypted** email to [mrcctu.stampede@ucl.ac.uk](mailto:mrcctu.stampede@ucl.ac.uk)

### COORDINATING SITE

MRC Clinical Trials Unit at UCL  
90 High Holborn  
2nd Floor  
London WC1V 6LJ  
UK

Switchboard: 020 7670 4700  
Fax: 020 7670 4818  
Email: [mrcctu.stampede@ucl.ac.uk](mailto:mrcctu.stampede@ucl.ac.uk)  
Website: [www.stampedetrial.org](http://www.stampedetrial.org)

### MRC CTU AT UCL STAFF

|                          |                      |      |               |
|--------------------------|----------------------|------|---------------|
| Trial Manager:           | Michelle Buckner     | Tel: | 0207 670 4840 |
| Trial Manager:           | Sarah Jackson        | Tel: | 0207 670 4674 |
| Trial Manager            | Dymphna Lee          | Tel: | 0207 670 4916 |
| Trial Manager            | Malissa Richmond     | Tel: | 0207 670 4910 |
| Trial Manager:           | Christopher Wanstall | Tel: | 0207 670 4882 |
| Trial Manager            | Melanie Weiss        | Tel: | 0207 670 4843 |
| Clinical Project Manager | Claire Amos          | Tel: | 0207 670 4771 |
| Clinical Project Manager | Nafisah B Atako      | Tel: | 0207 670 4896 |
| Clinical Project Manager | Cheryl Pugh          | Tel: | 0207 670 4935 |

**FOR ALL OTHER CONTACTS:** <http://www.stampedetrial.org/contact-us/trial-team/>

### SAAK COORDINATING CENTRE

Zuzanna Maniecka                      Bern, Switzerland

## CHIEF INVESTIGATOR

Prof Nicholas James

Prostate and Bladder Cancer Research Team Leader  
The Institute of Cancer Research,  
237 Fulham Road London, SW3 6JB  
UK

Tel: 020 7153 5130 (PA)

Email: [nick.james@icr.ac.uk](mailto:nick.james@icr.ac.uk)

## CO-INVESTIGATORS AND TMG MEMBERS

|                                                |                        |                                                 |
|------------------------------------------------|------------------------|-------------------------------------------------|
| Prof Gerhardt Attard<br>Oncologist             | London, UK             | CCI "Enzalutamide+Abiraterone<br>comparison"    |
| Dr Simon Chowdhury<br>Oncologist               | London, UK             |                                                 |
| Prof Noel Clarke<br>Urologist                  | Manchester, UK         | TMG Vice-Chair<br>Co-CCI "Metformin comparison" |
| Mr William Cross<br>Urologist                  | Leeds, UK              |                                                 |
| Prof David Dearnaley<br>Oncologist             | London, UK             |                                                 |
| Dr Duncan Gilbert<br>Oncologist                | London & Brighton, UK  |                                                 |
| Prof Silke Gillessen<br>Oncologist             | St Gallen, Switzerland | Co-CCI "Metformin comparison"                   |
| Prof Rob Jones<br>Oncologist                   | Glasgow, UK            |                                                 |
| Prof Ruth Langley<br>Oncologist                | London & Brighton, UK  | CCI "Transdermal oestradiol comparison"         |
| Dr Zafar Malik<br>Oncologist                   | Liverpool, UK          |                                                 |
| Prof Chris Parker<br>Oncologist                | London, UK             | CCI "M1 RT comparison"                          |
| Dr Martin Russell<br>Oncologist                | Glasgow, UK            |                                                 |
| Robin Millman<br>Patient representative        | UK                     |                                                 |
| David Matheson,<br>Patient representative      | UK                     |                                                 |
| Prof Mark Sculpher<br>Health Economics Advisor | York, UK               |                                                 |
| Rachel Hunter<br>PRIMENT UCL                   | London, UK             |                                                 |
| Dr Amanda Adler<br>Metformin adviser           | Cambridge UK           |                                                 |
| Dr Hannah Rush<br>Clinical Research Fellow     | London, UK             |                                                 |

Dr Archie Macnair  
Clinical Research Fellow

London, UK

**TRIAL ADVISORY GROUPS**

Biological Research Group  
STRATOSPHERE consortium

Bone & Imaging Group

Clinical Safety Committee

Comparison Management Groups

Metabolic Translational Group

Outcome Review Group

Site Advisory Team

Quality of Life Group

**CHAIRS**

Prof Gerhardt Attard

Prof Noel Clarke

Prof Noel Clarke

Each led by Comparison Chief Investigator(s)

Prof Silke Gillessen

Prof Robert Jones

Mr William Cross

Prof Nicholas James

## CONTENTS

|                                                                                                                  |           |
|------------------------------------------------------------------------------------------------------------------|-----------|
| <b>GENERAL INFORMATION .....</b>                                                                                 | <b>3</b>  |
| <b>CONTENTS .....</b>                                                                                            | <b>7</b>  |
| <b>SUMMARY OF TRIAL .....</b>                                                                                    | <b>11</b> |
| <b>ABBREVIATIONS &amp; GLOSSARY .....</b>                                                                        | <b>19</b> |
| <b>2.1 INTRODUCTION AND SETTING .....</b>                                                                        | <b>28</b> |
| 2.1.1 Long-term Androgen Deprivation Therapy.....                                                                | 28        |
| 2.1.2 Role Of SOC Radiotherapy .....                                                                             | 28        |
| 2.1.3 Role Of SOC systemic therapy: docetaxel, abiraterone, enzalutamide or apalutamide in addition to ADT ..... | 29        |
| <b>2.2 DESIGN .....</b>                                                                                          | <b>30</b> |
| <b>2.3 PREVIOUSLY-REPORTED RESEARCH TREATMENTS .....</b>                                                         | <b>30</b> |
| <b>2.4 COMPARISONS IN FOLLOW-UP .....</b>                                                                        | <b>31</b> |
| <b>2.5 RATIONALE FOR RECRUITING COMPARISONS.....</b>                                                             | <b>31</b> |
| 2.5.1 Metformin .....                                                                                            | 31        |
| 2.5.2 Transdermal Oestradiol .....                                                                               | 32        |
| <b>3.1 SITE/INVESTIGATOR CRITERIA .....</b>                                                                      | <b>34</b> |
| 3.1.1 Principle Investigator's Qualifications & Agreements.....                                                  | 34        |
| 3.1.2 Adequate Resources .....                                                                                   | 35        |
| <b>3.2 COMPARISON-SPECIFIC SITE ACCREDITATION .....</b>                                                          | <b>35</b> |
| 3.2.1 Transdermal Oestradiol Comparison: arms A & L.....                                                         | 35        |
| <b>3.3 REQUIRED TRIAL DOCUMENTATION .....</b>                                                                    | <b>36</b> |
| <b>4.1 IDENTIFYING POTENTIAL TRIAL PARTICIPANTS .....</b>                                                        | <b>37</b> |
| <b>4.2 APPROACH TO INFORMED CONSENT .....</b>                                                                    | <b>37</b> |
| 4.2.1 Screening Investigations Prior To Randomisation .....                                                      | 37        |
| 4.2.2 Baseline Investigations required for participants allocated to arms A, K, L .....                          | 38        |
| <b>4.3 PRIOR PERMITTED SOC TREATMENTS .....</b>                                                                  | <b>38</b> |
| 4.3.1 Hormone Treatment Prior To Randomisation .....                                                             | 38        |
| 4.3.2 Standard-Of-Care (SOC) Radiotherapy.....                                                                   | 39        |
| 4.3.3 Standard-Of-Care (SOC) Systemic Therapy; docetaxel, abiraterone, enzalutamide or apalutamide .....         | 39        |
| <b>4.4 GENERAL INCLUSION CRITERIA – DISEASE CATEGORIES.....</b>                                                  | <b>40</b> |
| 4.4.1 High-Risk Newly-Diagnosed Non-Metastatic Node-Negative (N0/Nx) Disease.....                                | 40        |
| 4.4.2 Newly-Diagnosed Metastatic Or Node-Positive Disease .....                                                  | 40        |
| 4.4.3 Previously Radically Treated, Now Relapsing (Prior Radical Surgery And/or Radiotherapy) ..                 | 40        |
| <b>4.5 GENERAL INCLUSION CRITERIA REQUIRED FOR ALL PARTICIPANTS .....</b>                                        | <b>40</b> |
| <b>4.6 GENERAL EXCLUSION CRITERIA .....</b>                                                                      | <b>41</b> |
| <b>4.7 COMPARISON-SPECIFIC ELIGIBILITY CRITERIA .....</b>                                                        | <b>42</b> |
| 4.7.1 Metformin Comparison (randomisation between arm A and arm K).....                                          | 42        |
| 4.7.2 Transdermal Oestradiol Comparison (randomisation between arm A and arm L) .....                            | 42        |
| <b>4.8 SUB-STUDY ELIGIBILITY CRITERIA .....</b>                                                                  | <b>43</b> |
| 4.8.1 Eligibility for germline DNA sub-study (Saliva samples).....                                               | 43        |
| 4.8.2 Eligibility for the circulating tumour DNA sub-study (sequential blood samples).....                       | 43        |
| 4.8.3 Eligibility for tumour sample analysis (FFPE blocks) .....                                                 | 43        |
| 4.8.4 Eligibility for metformin metabolic sub-study .....                                                        | 43        |
| <b>5.1 RANDOMISATION .....</b>                                                                                   | <b>44</b> |
| <b>5.2 CO-ENROLMENT GUIDELINES .....</b>                                                                         | <b>44</b> |



|            |                                                                                                      |           |
|------------|------------------------------------------------------------------------------------------------------|-----------|
| <b>6.1</b> | <b>STANDARD-OF-CARE (SOC)</b> .....                                                                  | <b>46</b> |
| 6.1.1      | Androgen Deprivation Therapy.....                                                                    | 46        |
| 6.1.2      | SOC Radiotherapy to prostate .....                                                                   | 47        |
| 6.1.3      | Administration of SOC RT.....                                                                        | 47        |
| 6.1.4      | SOC upfront systemic therapy: docetaxel, abiraterone, enzalutamide or apalutamide .....              | 48        |
| <b>6.2</b> | <b>RESEARCH TREATMENTS</b> .....                                                                     | <b>49</b> |
| 6.2.1      | Treatment Duration .....                                                                             | 49        |
| 6.2.2      | Research Abiraterone + Prednisolone (relevant to Arms G & J).....                                    | 51        |
| 6.2.3      | Research Enzalutamide (Arm J).....                                                                   | 60        |
| 6.2.4      | Research Metformin (Arm K) .....                                                                     | 63        |
| 6.2.5      | Research Transdermal Oestradiol (Arm L) .....                                                        | 68        |
| <b>6.3</b> | <b>CONCOMITANT TREATMENTS</b> .....                                                                  | <b>71</b> |
| <b>6.4</b> | <b>TRIAL PRODUCTS</b> .....                                                                          | <b>71</b> |
| <b>6.5</b> | <b>TREATMENT DATA COLLECTION</b> .....                                                               | <b>71</b> |
| <b>6.6</b> | <b>MEASURES OF COMPLIANCE/ADHERENCE</b> .....                                                        | <b>71</b> |
| <b>7.1</b> | <b>SCHEDULE FOR ASSESSMENTS</b> .....                                                                | <b>73</b> |
| 7.1.1      | Follow-up Schedules .....                                                                            | 73        |
| 7.1.2      | PSA, Testosterone And Oestradiol Measurements.....                                                   | 73        |
| 7.1.3      | Assessment Of Treatment Failure (Definition Of Progression).....                                     | 73        |
| 7.1.4      | Additional Metabolic And Cardiovascular Outcomes .....                                               | 75        |
| 7.1.5      | Additional Safety Assessments .....                                                                  | 76        |
| <b>7.2</b> | <b>DATA COLLECTION PROCEDURES</b> .....                                                              | <b>77</b> |
| 7.2.1      | Data Collection For SOC Hormone Therapy.....                                                         | 77        |
| 7.2.2      | Data Collection For SOC Systemic therapy: docetaxel, abiraterone, enzalutamide, or apalutamide ..... | 77        |
| 7.2.3      | Data Collection And Non-Administration Of Standard Radiotherapy.....                                 | 78        |
| 7.2.4      | Data Collection For Palliative Radiotherapy .....                                                    | 78        |
| 7.2.5      | Data Collection for Research (M1) Radiotherapy .....                                                 | 78        |
| 7.2.6      | Data Collection for Additional Treatments Given for Disease Progression .....                        | 78        |
| <b>7.3</b> | <b>FOLLOW-UP PROCEDURE</b> .....                                                                     | <b>79</b> |
| 7.3.1      | Follow-up Telephone Consultations .....                                                              | 79        |
| 7.3.2      | Follow-up Using Electronic Healthcare Records .....                                                  | 79        |
| <b>7.4</b> | <b>TRIAL &amp; COMPARISON CLOSURE</b> .....                                                          | <b>80</b> |
| 7.4.1      | Comparisons for which Follow-up has Ceased .....                                                     | 80        |
| <b>8.1</b> | <b>STOPPING RESEARCH INTERVENTIONS</b> .....                                                         | <b>84</b> |
| 8.1.1      | Stopping Research Treatment: Abiraterone, Enzalutamide + Abiraterone .....                           | 84        |
| 8.1.2      | Stopping Research Treatment: Metformin .....                                                         | 84        |
| 8.1.3      | Stopping Research Treatment: Transdermal Oestradiol .....                                            | 85        |
| <b>8.2</b> | <b>BREAKS IN SOC ADT</b> .....                                                                       | <b>85</b> |
| <b>8.3</b> | <b>PARTICIPANT TRANSFERS</b> .....                                                                   | <b>86</b> |
| <b>8.4</b> | <b>EARLY CESSATION OF TRIAL PARTICIPATION</b> .....                                                  | <b>86</b> |
| <b>9.1</b> | <b>METHOD OF RANDOMISATION</b> .....                                                                 | <b>88</b> |
| <b>9.2</b> | <b>OUTCOME MEASURES</b> .....                                                                        | <b>88</b> |
| <b>9.3</b> | <b>SAMPLE SIZE: PRINCIPLES</b> .....                                                                 | <b>89</b> |
| <b>9.4</b> | <b>SAMPLE SIZE ISSUES &amp; TRIAL STAGES: ADDITIONAL RESEARCH ARM H</b> .....                        | <b>92</b> |
| 9.4.1      | Pilot Phase: Additional Research Arm H .....                                                         | 92        |
| 9.4.2      | Activity Stages I-III: Additional Research Arm H.....                                                | 92        |
| 9.4.3      | Efficacy Stage IV: Additional Research Arm H.....                                                    | 92        |
| 9.4.4      | Sample Size For Additional Research Arm H.....                                                       | 92        |
| <b>9.5</b> | <b>SAMPLE SIZE ISSUES &amp; TRIAL STAGES: ADDITIONAL RESEARCH ARM J</b> .....                        | <b>94</b> |
| 9.5.1      | Pilot Phase: Additional Research Arm J.....                                                          | 94        |
| 9.5.2      | Activity Stages I-II: Additional Research Arm J.....                                                 | 94        |

|             |                                                                                           |            |
|-------------|-------------------------------------------------------------------------------------------|------------|
| 9.5.3       | Efficacy Stage III: Additional Research Arm J .....                                       | 94         |
| 9.5.4       | Sample Size For Additional Research Arm J .....                                           | 95         |
| 9.5.5       | Update to Efficacy Stage Analysis For Additional Research Arm J .....                     | 95         |
| <b>9.6</b>  | <b>SAMPLE SIZE ISSUES &amp; TRIAL STAGES: ADDITIONAL RESEARCH ARM K .....</b>             | <b>96</b>  |
| 9.6.1       | Implementation: Additional Research Arm K .....                                           | 96         |
| 9.6.2       | Outcome Measures: Additional Research Arm K.....                                          | 97         |
| 9.6.3       | Pilot Phase: Additional Research Arm K.....                                               | 98         |
| 9.6.4       | Activity Stage I: Additional Research Arm K.....                                          | 98         |
| 9.6.5       | Efficacy Stage II: Additional Research Arm K .....                                        | 98         |
| 9.6.6       | Sample Size For Additional Research Arm K .....                                           | 99         |
| 9.6.7       | Further Sample Size Issues For Additional Research Arm K.....                             | 99         |
| <b>9.7</b>  | <b>SAMPLE SIZE ISSUES &amp; TRIAL STAGES: ADDITIONAL RESEARCH ARM L.....</b>              | <b>100</b> |
| 9.7.1       | Implementation And Outcome Measures: Additional Research Arm L.....                       | 100        |
| 9.7.2       | Additional Use of Outcome Data from the “transdermal oestradiol comparison” .....         | 101        |
| 9.7.3       | Definition of PFS and Use As Co-primary Outcome Measure: Additional Research Arm L... 101 |            |
| 9.7.4       | Abiraterone/Enzalutamide/Apalutamide enhanced safety monitoring.....                      | 102        |
| <b>9.8</b>  | <b>FURTHER NOTES ON TRIAL DESIGN .....</b>                                                | <b>102</b> |
| 9.8.1       | Overall Sample Size .....                                                                 | 102        |
| 9.8.2       | Factorial Design.....                                                                     | 102        |
| <b>9.9</b>  | <b>INTERIM MONITORING AND ANALYSES .....</b>                                              | <b>103</b> |
| <b>9.10</b> | <b>OUTLINE ANALYSIS PLAN .....</b>                                                        | <b>103</b> |
| 9.10.1      | Pilot / Safety Phases.....                                                                | 104        |
| 9.10.2      | Activity And Efficacy Stages .....                                                        | 104        |
| <b>10.1</b> | <b>DATA MONITORING .....</b>                                                              | <b>105</b> |
| 10.1.1      | Central Monitoring Of Consent.....                                                        | 105        |
| 10.1.2      | Central Monitoring Of Data .....                                                          | 105        |
| 10.1.3      | Direct Access to Patient Data.....                                                        | 105        |
| 10.1.4      | Monitoring Visits to Investigator Sites.....                                              | 105        |
| <b>10.2</b> | <b>CONFIDENTIALITY .....</b>                                                              | <b>106</b> |
| <b>11.1</b> | <b>SAFETY REPORTING DEFINITIONS.....</b>                                                  | <b>107</b> |
| 11.1.1      | Adverse event definitions .....                                                           | 108        |
| 11.1.2      | Defining “treatment” for the purposes of safety reporting.....                            | 108        |
| <b>11.2</b> | <b>SITE INVESTIGATOR RESPONSIBILITIES.....</b>                                            | <b>109</b> |
| 11.2.1      | Notification period .....                                                                 | 109        |
| 11.2.2      | Trial-Specific “Expedited Reporting” Exemptions .....                                     | 110        |
| 11.2.3      | Investigator Assessment .....                                                             | 111        |
| 11.2.4      | Event Follow-up .....                                                                     | 113        |
| <b>11.3</b> | <b>CTU RESPONSIBILITIES .....</b>                                                         | <b>114</b> |
| 11.3.1      | Sponsor (CTU) Assessment .....                                                            | 114        |
| <b>12.1</b> | <b>ETHICAL CONSIDERATIONS .....</b>                                                       | <b>116</b> |
| <b>12.2</b> | <b>ETHICAL APPROVAL.....</b>                                                              | <b>117</b> |
| <b>13.1</b> | <b>DATA COLLECTION &amp; RETENTION .....</b>                                              | <b>119</b> |
| <b>16.1</b> | <b>TRIAL MANAGEMENT GROUP (TMG) .....</b>                                                 | <b>122</b> |
| <b>16.2</b> | <b>TRIAL STEERING COMMITTEE (TSC) .....</b>                                               | <b>122</b> |
| <b>16.3</b> | <b>INDEPENDENT DATA MONITORING COMMITTEE (IDMC).....</b>                                  | <b>122</b> |
| <b>16.4</b> | <b>TMG SUB-GROUPS AND EXPERT PANELS .....</b>                                             | <b>123</b> |
| <b>16.5</b> | <b>MRC CTU AT UCL INTERNAL GROUPS .....</b>                                               | <b>123</b> |
| <b>17.1</b> | <b>PATIENT REPORTED OUTCOMES .....</b>                                                    | <b>125</b> |
| 17.1.1      | Quality of life (QL) .....                                                                | 125        |
| 17.1.2      | Health Economics.....                                                                     | 125        |
| <b>17.2</b> | <b>TRANSLATIONAL SUB-STUDIES.....</b>                                                     | <b>127</b> |
| 17.2.1      | Germline DNA Analysis .....                                                               | 127        |

|             |                                                                           |            |
|-------------|---------------------------------------------------------------------------|------------|
| 17.2.2      | Circulating Tumour-DNA Analysis (Sequential Blood Samples).....           | 127        |
| 17.2.3      | Tissue Sample Analysis (FFPE Blocks).....                                 | 127        |
| 17.2.4      | Biomarker-Screening Pilot .....                                           | 128        |
| 17.2.5      | Informed consent to receive results arising from genetic sub-studies..... | 128        |
| <b>17.3</b> | <b>DISEASE VOLUMETRIC ANALYSIS SUB-STUDY.....</b>                         | <b>128</b> |
| <b>17.4</b> | <b>USING ROUTINE DATA TO IDENTIFY CLINICAL TRIAL OUTCOMES .....</b>       | <b>128</b> |
| <b>17.5</b> | <b>METFORMIN METABOLIC SUBSTUDY.....</b>                                  | <b>129</b> |
| <b>18.1</b> | <b>POTENTIAL IMPACT OF PPI .....</b>                                      | <b>130</b> |
| <b>18.2</b> | <b>PATIENT REPRESENTATIVES.....</b>                                       | <b>130</b> |
| <b>21.1</b> | <b>PROTOCOL.....</b>                                                      | <b>133</b> |
| 21.1.1      | Amendments Made To Protocol Version 1.0 (May-2004) .....                  | 133        |
| 21.1.2      | Amendments Made To Protocol Version 1.1 (May-2005) .....                  | 133        |
| 21.1.3      | Amendments Made To Protocol Version 2.0 (Jun-2005).....                   | 133        |
| 21.1.4      | Amendments Made To Protocol Version 3.0 (Jul-2006).....                   | 134        |
| 21.1.5      | Amendments Made To Protocol Version 4.0 (Dec-2007) .....                  | 135        |
| 21.1.6      | Amendments Made To Protocol Version 5.0 (Aug-2008).....                   | 135        |
| 21.1.7      | Amendments Made To Protocol Version 6.0 (Jul-2009).....                   | 136        |
| 21.1.8      | Amendments Made To Protocol Version 7.0 (Jul-2011).....                   | 136        |
| 21.1.9      | Amendments Made To Protocol Version 7.1 (Jul-2011).....                   | 137        |
| 21.1.10     | Amendments Made To Protocol Version 8.0 (Sep-2011) .....                  | 138        |
| 21.1.11     | Amendments Made To Protocol Version 9.0 (Oct-2012).....                   | 139        |
| 21.1.12     | Amendments Made To Protocol Version 10.0 (Apr-2013) .....                 | 139        |
| 21.1.13     | Amendments Made To Protocol Version 11.0 (Sep-2013) .....                 | 140        |
| 21.1.14     | Amendments Made To Protocol Version 12.0 (Jan-2014).....                  | 140        |
| 21.1.15     | Amendments Made To Protocol Version 13.0 (Feb-2015) .....                 | 140        |
| 21.1.16     | Amendments Made To Protocol Version 14.0 (Oct-2015).....                  | 141        |
| 21.1.17     | Amendments Made To Protocol Version 15.0 (Mar-2017) .....                 | 142        |
| 21.1.18     | Amendments Made To Protocol Version 16.0 (Oct-2017).....                  | 142        |
| 21.1.19     | Amendments Made To Protocol Version 17.0 (Feb-2017) .....                 | 143        |
| 21.1.20     | Amendments made to Protocol Version 18.0 (Jun-2018).....                  | 144        |
| 21.1.21     | Amendments made to Protocol Version 19.0 (Aug-2020).....                  | 145        |
| 21.1.22     | Amendments made to Protocol Version 20.0 (Oct-2020) .....                 | 147        |

## SUMMARY OF TRIAL

| SUMMARY INFORMATION TYPE             | SUMMARY DETAILS                                                                                                                               |
|--------------------------------------|-----------------------------------------------------------------------------------------------------------------------------------------------|
| Acronym                              | STAMPEDE                                                                                                                                      |
| Long Title of Trial                  | Systemic Therapy in Advancing or Metastatic Prostate Cancer: Evaluation of Drug Efficacy: A multi-arm multi-stage randomised controlled trial |
| Version                              | 21.0                                                                                                                                          |
| Date                                 | 20-October-2020                                                                                                                               |
| MRC CTU at UCL ID                    | PR08                                                                                                                                          |
| NCT #                                | NCT00268476                                                                                                                                   |
| EudraCT #                            | 2004-000193-31                                                                                                                                |
| Study Design                         | Multi-arm multi-stage platform randomised controlled trial                                                                                    |
| Type of Participants to be Studied   | People starting long-term hormone therapy for metastatic or high-risk non-metastatic prostate cancer                                          |
| Setting                              | Tertiary care                                                                                                                                 |
| Interventions to be Compared         | Various - see comparison-specific tables                                                                                                      |
| Study Hypothesis                     | Various - see comparison-specific tables                                                                                                      |
| Definitive Primary Outcome Measure   | Overall survival (unless stated)                                                                                                              |
| Intermediate Primary Outcome Measure | Failure-free survival (unless stated)                                                                                                         |
| Secondary Outcome Measure(s)         | Toxicity<br>Symptomatic skeletal events<br>Quality-of-life<br>Cost-effectiveness                                                              |
| Randomisation                        | Minimisation using a random element across a number of stratification factors                                                                 |
| Number of Participants               | See comparison-specific tables                                                                                                                |
| Duration                             | See comparison-specific tables                                                                                                                |
| Sponsor                              | University College London                                                                                                                     |
| Funders                              | Cancer Research UK<br>Medical Research Council<br>Astellas<br>Clovis Oncology<br>Janssen<br>Novartis<br>Pfizer<br>Sanofi-Aventis              |

| SUMMARY INFORMATION TYPE             | SUMMARY DETAILS                                                                                                                                                                                                                                              |
|--------------------------------------|--------------------------------------------------------------------------------------------------------------------------------------------------------------------------------------------------------------------------------------------------------------|
| "Original comparisons"               |                                                                                                                                                                                                                                                              |
| Type of Participants to be Studied   | People starting long-term hormone therapy for metastatic or high-risk non-metastatic prostate cancer                                                                                                                                                         |
| Control Arm                          | <ul style="list-style-type: none"> <li>• Arm A: Standard-of-care (SOC)</li> </ul>                                                                                                                                                                            |
| Interventions to be Compared         | <ul style="list-style-type: none"> <li>• Arm B: SOC + zoledronic acid</li> <li>• Arm C: SOC + docetaxel</li> <li>• Arm D: SOC + celecoxib</li> <li>• Arm E: SOC + zoledronic acid + docetaxel</li> <li>• Arm F: SOC + zoledronic acid + celecoxib</li> </ul> |
| Allocation ratio                     | <ul style="list-style-type: none"> <li>• 2 control arm : 1 research arm [2A:1B:1C:1D:1E:1F]</li> </ul>                                                                                                                                                       |
| Study Hypothesis                     | Research interventions will improve survival over SOC                                                                                                                                                                                                        |
| Definitive Primary Outcome Measure   | Overall survival                                                                                                                                                                                                                                             |
| Intermediate Primary Outcome Measure | Failure-free survival                                                                                                                                                                                                                                        |
| Status                               | Primary results published and <b>active follow-up discontinued</b> Summer 2018 (1, 2)                                                                                                                                                                        |
| "Abiraterone comparison"             |                                                                                                                                                                                                                                                              |
| Type of Participants to be Studied   | People starting long-term hormone therapy for metastatic or high-risk non-metastatic prostate cancer                                                                                                                                                         |
| Control arm                          | <ul style="list-style-type: none"> <li>• Arm A: Standard-of-care (SOC)</li> </ul>                                                                                                                                                                            |
| Intervention to be Compared          | <ul style="list-style-type: none"> <li>• Arm G: SOC + abiraterone</li> </ul>                                                                                                                                                                                 |
| Allocation ratio                     | <ul style="list-style-type: none"> <li>• 1 control arm : 1 research arm [1A:1G]</li> </ul>                                                                                                                                                                   |
| Study Hypothesis                     | Addition of abiraterone to SOC will improve survival over SOC alone                                                                                                                                                                                          |
| Definitive Primary Outcome Measure   | Overall survival                                                                                                                                                                                                                                             |
| Intermediate Primary Outcome Measure | Failure-free survival                                                                                                                                                                                                                                        |
| Number of Participants               | Around 1,800 patients for 267 control arm definitive primary outcome measure events                                                                                                                                                                          |
| Duration                             | 6 to 8 years                                                                                                                                                                                                                                                 |
| Status                               | Primary results published (3), remains on active follow-up to permit a further longer-term analysis                                                                                                                                                          |
| "M1 RT comparison"                   |                                                                                                                                                                                                                                                              |
| Type of Participants to be Studied   | People starting long-term hormone therapy for newly-diagnosed metastatic prostate cancer with no contraindication to prostate radiotherapy                                                                                                                   |
| Control arm                          | <ul style="list-style-type: none"> <li>• Arm A: Standard-of-care (SOC)</li> </ul>                                                                                                                                                                            |
| Intervention to be Compared          | <ul style="list-style-type: none"> <li>• Arm H: SOC + radiotherapy to the prostate (RT)</li> </ul>                                                                                                                                                           |
| Allocation ratio                     | <ul style="list-style-type: none"> <li>• 1 control arm : 1 research arm [1A:1H]</li> </ul>                                                                                                                                                                   |
| Study Hypothesis                     | Addition of RT to SOC will improve survival over SOC alone                                                                                                                                                                                                   |

| SUMMARY INFORMATION TYPE                       | SUMMARY DETAILS                                                                                                                                           |
|------------------------------------------------|-----------------------------------------------------------------------------------------------------------------------------------------------------------|
| Definitive Primary Outcome Measure             | Overall survival                                                                                                                                          |
| Intermediate Primary Outcome Measure           | Failure-free survival                                                                                                                                     |
| Number of Participants                         | Around 1,800 patients for 267 control arm definitive primary outcome measure events                                                                       |
| Duration                                       | 6 to 8 years                                                                                                                                              |
| Status                                         | Primary results published (4) remains on active follow-up to permit a further longer-term analysis                                                        |
| <b>“Enzalutamide + abiraterone comparison”</b> |                                                                                                                                                           |
| Type of Participants                           | People starting long-term hormone therapy for metastatic or high-risk non-metastatic prostate cancer                                                      |
| Control Arm                                    | <ul style="list-style-type: none"> <li>• Arm A: Standard-of-care (SOC)</li> </ul>                                                                         |
| Interventions to be Compared                   | <ul style="list-style-type: none"> <li>• Arm J: SOC + enzalutamide + abiraterone</li> </ul>                                                               |
| Allocation ratio                               | <ul style="list-style-type: none"> <li>• 1 control arm : 1 research arm [1A:1J]</li> </ul>                                                                |
| Study Hypothesis                               | Addition of enzalutamide, in combination with abiraterone, to SOC will improve survival over SOC alone                                                    |
| Definitive Primary Outcome Measure             | Overall survival                                                                                                                                          |
| Intermediate Primary Outcome Measure           | Failure-free survival                                                                                                                                     |
| Number of Participants                         | Around 1,800 patients for 267 control arm definitive primary outcome measure events                                                                       |
| Duration                                       | 6 to 8 years                                                                                                                                              |
| Status                                         | In follow-up                                                                                                                                              |
| <b>“Metformin comparison”</b>                  |                                                                                                                                                           |
| Type of Participants to be Studied             | Non-diabetic people, with no contraindication to metformin, starting long-term hormone therapy for metastatic or high-risk non-metastatic prostate cancer |
| Control arm                                    | <ul style="list-style-type: none"> <li>• Arm A: Standard-of-care (SOC)</li> </ul>                                                                         |
| Intervention to be Compared                    | <ul style="list-style-type: none"> <li>• Arm K: SOC + metformin</li> </ul>                                                                                |
| Allocation ratio                               | <ul style="list-style-type: none"> <li>• 1 control arm : 1 research arm [1A:1K]</li> </ul>                                                                |
| Study Hypothesis                               | Addition of metformin to SOC will improve survival over SOC alone                                                                                         |
| Definitive Primary Outcome Measure             | Overall survival                                                                                                                                          |
| Intermediate Primary Outcome Measure           | Overall survival                                                                                                                                          |
| Number of Participants                         | Around 2800 patients, including around 1,700 M1 (metastatic) patients, for 473 control arm definitive primary outcome measure events among M1 patients    |
| Duration                                       | 7 years                                                                                                                                                   |

| SUMMARY INFORMATION TYPE             | SUMMARY DETAILS                                                                                                                                                                                                                            |
|--------------------------------------|--------------------------------------------------------------------------------------------------------------------------------------------------------------------------------------------------------------------------------------------|
| Status                               | Recruiting                                                                                                                                                                                                                                 |
| "Transdermal oestradiol comparison"  |                                                                                                                                                                                                                                            |
| Type of Participants to be Studied   | People starting long-term hormone therapy for metastatic or high-risk non-metastatic prostate cancer, having had no more than one 4-week (or one-month) LHRH (Luteinizing hormone releasing hormone) injection & 8 weeks of anti-androgens |
| Control arm                          | <ul style="list-style-type: none"> <li>• Arm A: Standard-of-care (SOC)</li> </ul>                                                                                                                                                          |
| Intervention to be Compared          | <ul style="list-style-type: none"> <li>• Arm L: Transdermal oestradiol ± RT ± docetaxel/abiraterone/enzalutamide/apalutamide</li> </ul>                                                                                                    |
| Allocation ratio                     | <ul style="list-style-type: none"> <li>• 1 control arm : 1 research arm [1A:1L]</li> </ul>                                                                                                                                                 |
| Study Hypothesis                     | Transdermal oestradiol will be non-inferior to standard hormone therapy, while having fewer side-effects and improved quality-of-life                                                                                                      |
| Definitive Primary Outcome Measures  | Co-primary endpoints of progression-free survival and overall survival                                                                                                                                                                     |
| Intermediate Primary Outcome Measure | Progression-free survival                                                                                                                                                                                                                  |
| Number of Participants               | Around 700 to include within a meta-analysis with the PATCH trial (EudraCT 2005-001030-33), which will include around 2,500 patients overall                                                                                               |
| Duration                             | 4 to 6 years                                                                                                                                                                                                                               |
| Status                               | Recruiting                                                                                                                                                                                                                                 |

Figure 1: Randomisation schema from protocol v21.0 onwards

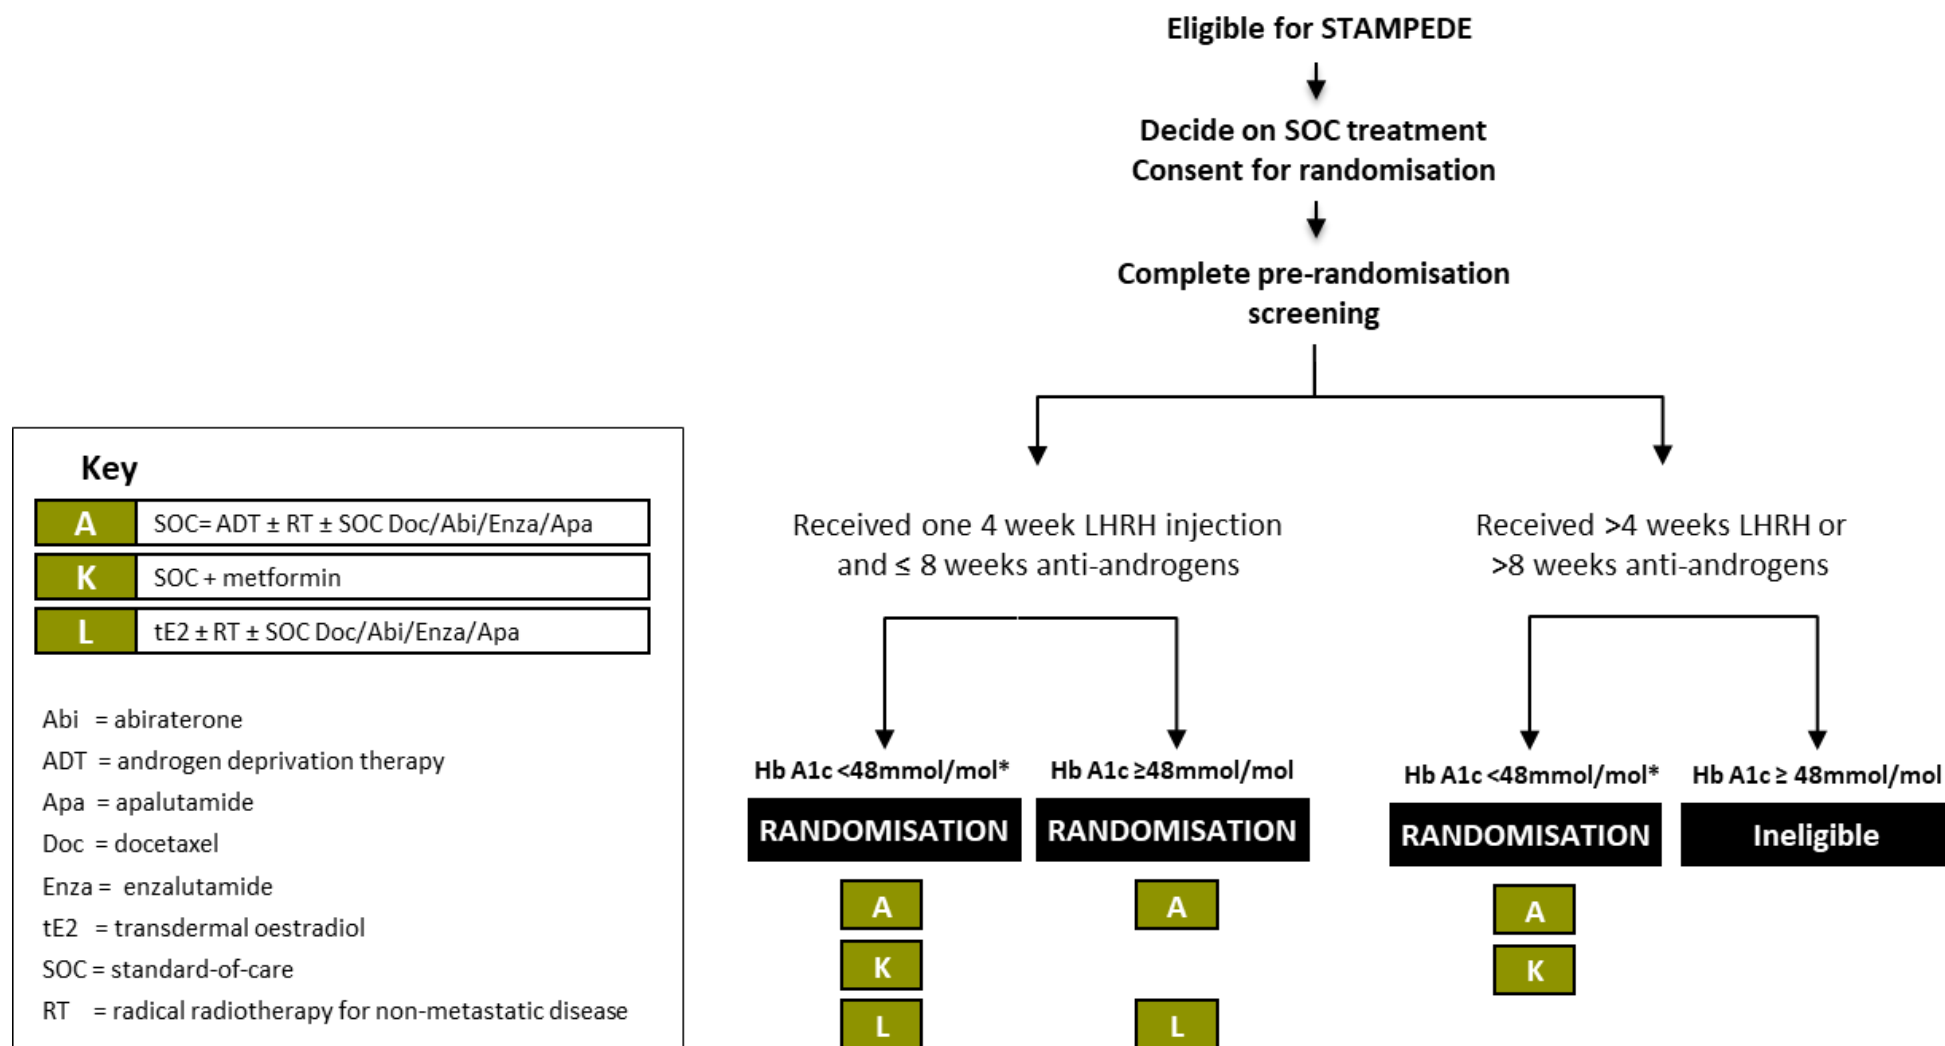

\*Participants must not have received any treatment with any anti-diabetes medication but diet controlled diabetes is allowed if HbA1c now in limits.



Figure 2: Arms of the STAMPEDE trial open to recruitment over time

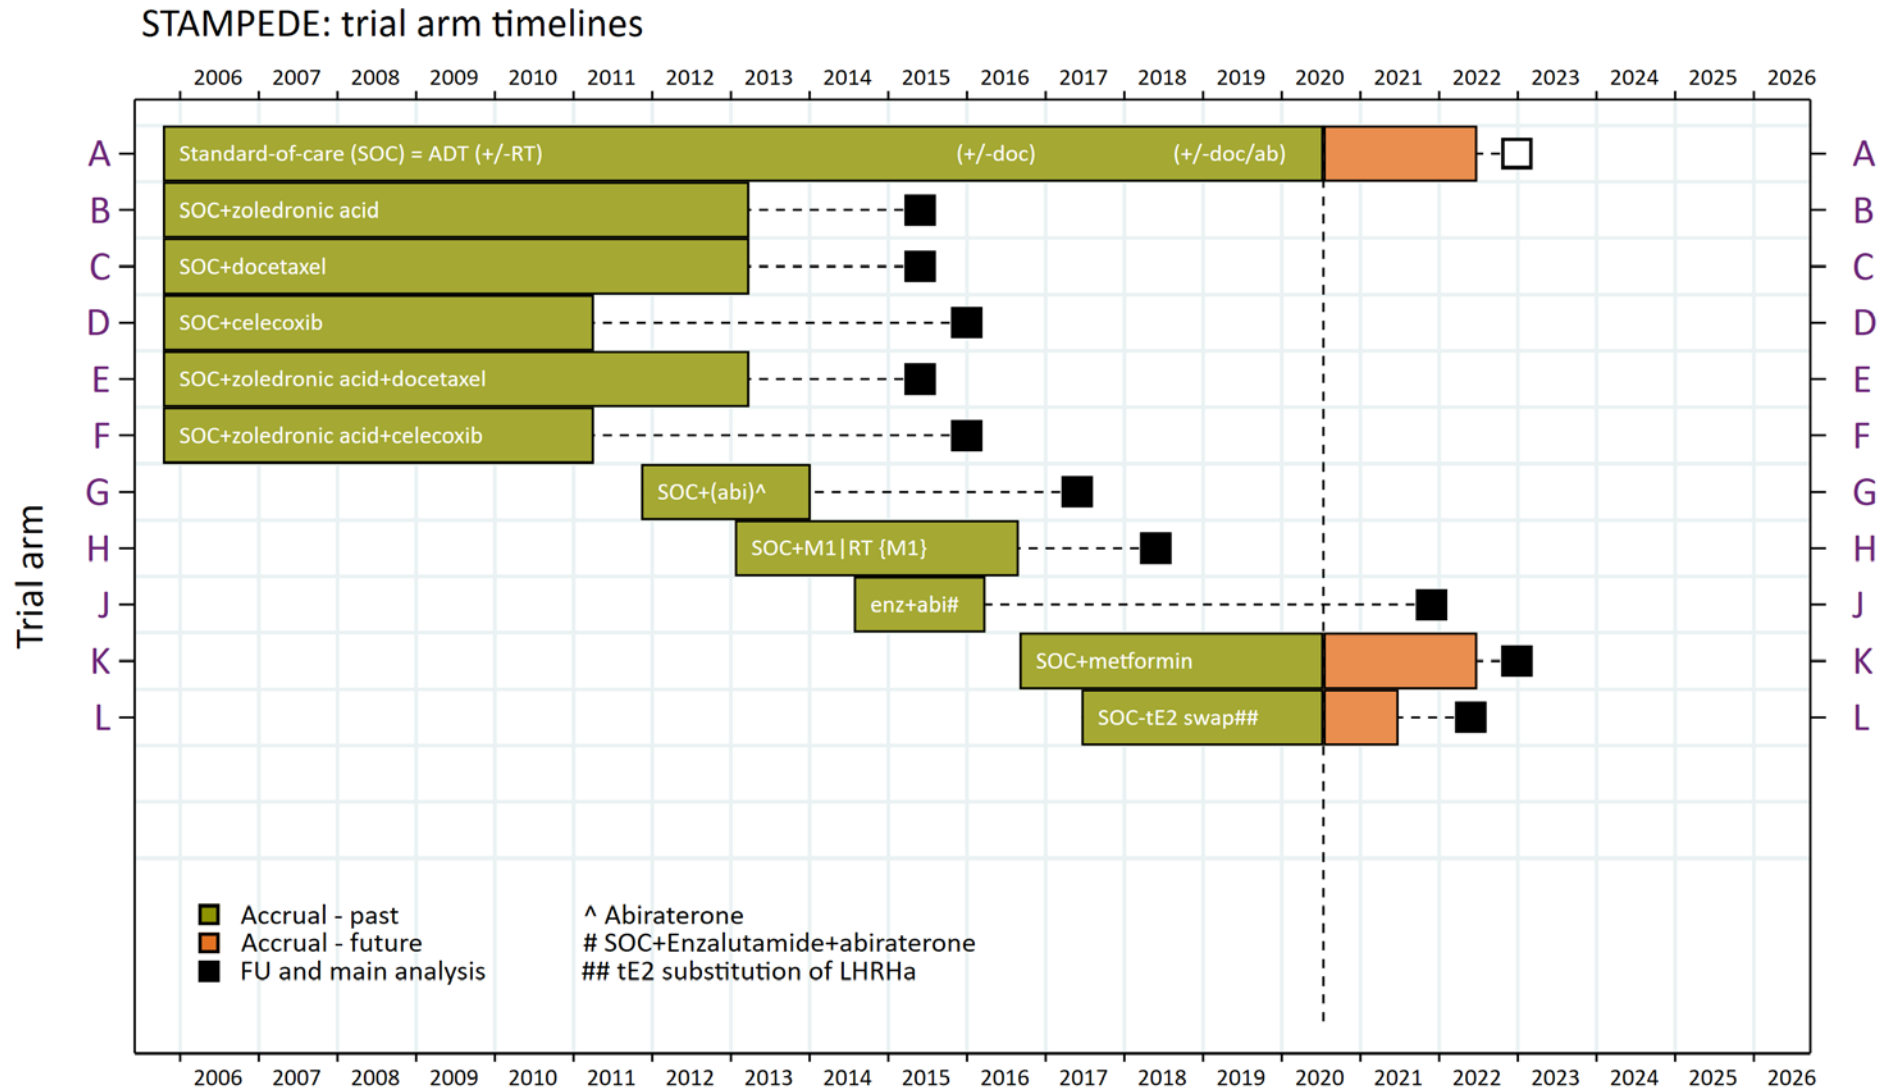

**Table 1: Schedule of Assessments for Participants Randomised before 05-Sep-2016**

|                                                           | ASSESSMENT WEEK               |    |    |    |    |                |    |                |                |    |     | ALL FURTHER VISITS <sup>1</sup> | AT EACH DISEASE EVENT <sup>2</sup> | END OF TRT | PRIOR TO 2 <sup>ND</sup> LINE TRT |   |
|-----------------------------------------------------------|-------------------------------|----|----|----|----|----------------|----|----------------|----------------|----|-----|---------------------------------|------------------------------------|------------|-----------------------------------|---|
|                                                           | 4-6                           | 12 | 18 | 24 | 36 | 48             | 60 | 72             | 84             | 96 | 104 |                                 |                                    |            |                                   |   |
| <b>Arm A/G/J</b>                                          |                               |    |    |    |    |                |    |                |                |    |     |                                 |                                    |            |                                   |   |
| Blood collection cell-free DNA Streck™ tubes <sup>3</sup> |                               |    |    |    |    | X <sup>4</sup> |    | X <sup>4</sup> | X <sup>4</sup> |    |     |                                 |                                    | X          | X                                 | X |
| Saliva sample <sup>3</sup>                                | Any time point                |    |    |    |    |                |    |                |                |    |     |                                 |                                    |            |                                   |   |
| FFPE block <sup>3</sup>                                   | Once, at the point of request |    |    |    |    |                |    |                |                |    |     |                                 |                                    |            |                                   |   |
| PSA                                                       | X                             | X  | X  | X  | X  | X              | X  | X              | X              | X  | X   | X                               | X                                  |            |                                   |   |
| Waist circumference + Weight                              | X                             | X  | X  | X  | X  | X              | X  | X              | X              | X  | X   | X                               | X                                  |            |                                   |   |
| Concomitant medication                                    | X                             | X  | X  | X  | X  | X              | X  | X              | X              | X  | X   | X                               | X                                  |            |                                   |   |
| QL + HE <sup>5,3</sup>                                    | X                             | X  | X  | X  | X  | X              | X  | X              | X              | X  | X   | X                               | X                                  |            |                                   |   |
| <b>Arm G&amp;J only</b>                                   |                               |    |    |    |    |                |    |                |                |    |     |                                 |                                    |            |                                   |   |
| Blood pressure <sup>6</sup>                               | X                             | X  | X  | X  | X  | X              | X  | X              | X              | X  | X   | X                               | X                                  |            |                                   |   |
| Safety bloods (LFTs and potassium) <sup>6</sup>           | X                             | X  | X  | X  | X  | X              | X  | X              | X              | X  | X   | X                               | X                                  |            |                                   |   |

<sup>1</sup> Follow-up visits after year 2 need to be carried out every 6 months for the first 5 years. At year 6 and onwards visits should be every 12 months whilst active follow-up continues.

<sup>2</sup> Disease events are defined as each type of disease progression: PSA (biochemical), clinical (symptomatic) and radiological (objective).

<sup>3</sup> Only if participating in relevant sub-study, for information regarding samples see the [Sample Collection & Handling Manual](#) available via the STAMPEDE website for details

<sup>4</sup> Sample only required for participants with metastatic disease at trial entry (M1)

<sup>5</sup> Review [Table 38](#) for a breakdown of participants that are still required to complete Quality-of-life (QL) + health economic (HE) questionnaires

<sup>6</sup> For participants receiving research abiraterone, BP, liver function tests (LFTs) and serum potassium monitoring is required 2-weekly in the first 12 weeks, then monthly until 12 months on treatment. For participants who have not experienced Toxicity following 12 months of treatment, this may be reduced to every 2 months whilst research abiraterone continues. Arm J participants continuing on enzalutamide alone may reduce to 3 monthly BP monitoring, no requirement for ongoing safety blood tests. Increased monitoring is required in participants experiencing toxicity; see [Table 13](#), [Table 14](#) and [Table 15](#) for details.

**Table 2: Schedule of Assessments for Participants Randomised on or after 05-Sep-2016**

|                                                           | Pre-Rand <sup>n</sup> | ASSESSMENT WEEK         |    |    |                |    |                |    |                |                |    |                | ALL FURTHER VISITS <sup>1</sup> | AT EACH DISEASE EVENT <sup>2</sup> | END OF TRT | PRIOR TO 2 <sup>ND</sup> LINE TRT |
|-----------------------------------------------------------|-----------------------|-------------------------|----|----|----------------|----|----------------|----|----------------|----------------|----|----------------|---------------------------------|------------------------------------|------------|-----------------------------------|
|                                                           |                       | 4-6                     | 12 | 18 | 24             | 36 | 48             | 60 | 72             | 84             | 96 | 104            |                                 |                                    |            |                                   |
| <b>Arms A/K/L</b>                                         |                       |                         |    |    |                |    |                |    |                |                |    |                |                                 |                                    |            |                                   |
| Cardiac (BP)                                              | X                     |                         |    |    |                |    |                |    |                |                |    |                |                                 |                                    |            |                                   |
| Screening bloods <sup>3</sup>                             | X                     |                         |    |    |                |    |                |    |                |                |    |                |                                 |                                    |            |                                   |
| Full radiological screening <sup>4</sup>                  | X                     |                         |    |    |                |    |                |    |                |                |    |                |                                 |                                    |            |                                   |
| WHO PS                                                    | X                     |                         |    |    |                |    |                |    |                |                |    |                |                                 |                                    |            |                                   |
| Blood collection cell-free DNA Streck™ tubes <sup>5</sup> | X                     |                         |    |    |                |    | X <sup>3</sup> |    | X <sup>3</sup> | X <sup>3</sup> |    |                |                                 | X                                  | X          | X                                 |
| Saliva sample <sup>5</sup>                                |                       | Any time point          |    |    |                |    |                |    |                |                |    |                |                                 |                                    |            |                                   |
| FFPE block <sup>5</sup>                                   |                       | At the point of request |    |    |                |    |                |    |                |                |    |                |                                 |                                    |            |                                   |
| Waist circumference + Weight                              | X                     | X                       | X  | X  | X              | X  | X              | X  | X              | X              | X  | X              | X                               | X                                  |            |                                   |
| Height                                                    | X                     |                         |    |    |                |    |                |    |                |                |    |                |                                 |                                    |            |                                   |
| QL & HE <sup>5, 6</sup>                                   | X                     | X                       | X  | X  | X              | X  | X              | X  | X              | X              | X  | X              | X                               | X                                  |            |                                   |
| HbA1c & Lipid profile <sup>7</sup>                        | X                     |                         |    |    | X <sup>8</sup> |    | X <sup>8</sup> |    |                |                |    | X <sup>8</sup> | X <sup>8</sup>                  |                                    |            |                                   |
| Glucose & Triglycerides                                   | X                     |                         |    |    | X <sup>8</sup> |    | X <sup>8</sup> |    |                |                |    | X <sup>8</sup> | X <sup>8</sup>                  |                                    |            |                                   |
| PSA                                                       | X <sup>9</sup>        | X                       | X  | X  | X              | X  | X              | X  | X              | X              | X  | X              | X                               | X                                  |            |                                   |
| Concomitant medication                                    | X                     | X                       | X  | X  | X              | X  | X              | X  | X              | X              | X  | X              | X                               | X                                  |            |                                   |
| <b>Arm K only</b>                                         |                       |                         |    |    |                |    |                |    |                |                |    |                |                                 |                                    |            |                                   |
| Safety bloods (eGFR) <sup>10</sup>                        |                       |                         |    |    | X              |    | X              |    | X              |                | X  |                | X                               |                                    |            |                                   |
| <b>Arm L only</b>                                         |                       |                         |    |    |                |    |                |    |                |                |    |                |                                 |                                    |            |                                   |
| Testosterone & Oestradiol <sup>11</sup>                   |                       | X <sup>12</sup>         | X  |    | X              |    | X              |    | X              |                | X  |                | X                               |                                    |            |                                   |

<sup>1</sup> Follow-up visits after year 2 need to be carried out every 6 months for the first 5 years. At year 6 and onwards visits should be every 12 months whilst active follow-up continues.

<sup>2</sup> Disease events are defined as each type of disease progression: PSA (biochemical), clinical (symptomatic) and radiological (objective).

<sup>3</sup> U&Es, LFTs, Serum creatinine and FBCs to be completed before randomisation. Cholesterol, albumin, serum corrected calcium, phosphate, magnesium within 4 weeks before or after randomisation.

<sup>4</sup> Pre-randomisation imaging must be representative of current disease status, see [section 4.2.1](#)

<sup>5</sup> Only if participating in relevant sub-study, for information regarding samples see the [Sample Collection & Handling Manual](#) available via the STAMPEDE website for details

<sup>6</sup> Review [Table 38](#) for a breakdown of participants that are still required to complete Quality-of-life (QL) + health economic (HE) questionnaires

<sup>7</sup> HBA1c required prior to randomisation for participants being considered for “metformin comparison”.

<sup>8</sup> If missed, samples can be obtained +/-12 weeks of the scheduled FU visit, maintaining 10-12 weeks in between the tests due at week 24 and 48 weeks.

<sup>9</sup> Pre-ADT PSA must have been obtained within 6 months prior to randomisation and another PSA analysis should be completed within 2 weeks of randomisation.

<sup>10</sup> Increased monitoring of renal function required if renal function declines see [Table 23](#). To continue until metformin permanently stopped.

<sup>11</sup> Hormone tests are required whilst the participant is receiving research transdermal oestradiol. Note that additional tests may be necessary as detailed in [Section 6.2.5.B](#).

<sup>12</sup> First hormone tests for patients receiving research transdermal oestradiol should be at 4 weeks.

## ABBREVIATIONS & GLOSSARY

| ABBREVIATION | EXPANSION                                      |
|--------------|------------------------------------------------|
| AA           | Anti-androgen                                  |
| ACE          | Angiotensin-Converting Enzyme                  |
| ACTH         | Adrenocorticotrophic hormone                   |
| ADT          | Androgen deprivation therapy                   |
| AE           | Adverse Event                                  |
| AR           | Androgen receptor                              |
| AS           | Activity Stage                                 |
| AUC          | Area under the plasma concentration–time curve |
| BID          | Twice a day (bis in die)                       |
| BP           | Blood pressure                                 |
| BRCA2        | BReast CAncer gene 2                           |
| BRG          | Biological Research Group                      |
| BSA          | Body surface area                              |
| CCI          | Comparison Chief Investigator                  |
| CF           | Consent Form                                   |
| CI           | Confidence interval                            |
| Co-CCI       | Comparison Co-Chief Investigator               |
| Cox-2        | Cyclooxygenase 2                               |
| CRF          | Case Report Form                               |
| CRN          | Clinical Research Network                      |
| CRUK         | Cancer Research UK                             |
| CRPC         | Castrate-Resistant Prostate Cancer             |
| CT           | Computerised tomography                        |
| CTA          | Clinical Trials Authorisation                  |
| CTAAC        | Clinical Trials Advisory and Awards Committee  |
| ctDNA        | Circulating tumour DNA                         |
| CTC          | Common Toxicity Criteria                       |
| CTU          | Clinical Trials Unit                           |
| CTV          | Clinical Tumour Volume                         |
| CVS          | Cardiovascular                                 |
| CXR          | Chest X-ray                                    |
| DAB          | Dual Androgen Blockade                         |

| ABBREVIATION | EXPANSION                                                 |
|--------------|-----------------------------------------------------------|
| DHT          | Dihydrotestosterone                                       |
| DNA          | Deoxyribonucleic Acid                                     |
| DPA          | Data Protection Act                                       |
| ES           | Efficacy Stage                                            |
| IB           | Investigator Brochure                                     |
| ICH          | International Conference on Harmonization                 |
| ECG          | Electrocardiogram                                         |
| FBC          | Full Blood Count                                          |
| FFS          | Failure-Free Survival                                     |
| FFPE         | Formalin Fixed Paraffin Embedded                          |
| GCP          | Good Clinical Practice                                    |
| GFR          | Glomerular Filtration Rate                                |
| GP           | General Practitioner                                      |
| HbA1c        | Glycosylated haemoglobin                                  |
| Hb           | Haemoglobin                                               |
| HE           | Health Economics                                          |
| HES          | Hospital Episode Statistics                               |
| Hr           | Hour                                                      |
| HR           | Hazard Ratio                                              |
| HRA          | Health Research Authority                                 |
| HSCIC        | Health & Social Care Information Centre                   |
| HSPC         | Hormone Sensitive Prostate Cancer                         |
| HT           | Hormone Therapy                                           |
| IDMC         | Independent Data Monitoring Committee                     |
| IM           | Intramuscular                                             |
| IMRT         | Intensity Modulated Radiation Therapy                     |
| INR          | International Normalized Ratio                            |
| IR           | Immediate-Release                                         |
| ISRCTN       | International Standard Randomised Controlled Trial Number |
| IU           | International Units                                       |
| IV           | Intravenous                                               |
| LFTs         | Liver Function Tests                                      |
| LHRH         | Luteinising Hormone Releasing Hormone                     |
| LHRHa        | Luteinising Hormone Releasing Hormone antagonist/agonist  |

| ABBREVIATION | EXPANSION                                          |
|--------------|----------------------------------------------------|
| LREC         | Local Research Ethics Committee                    |
| m            | Month                                              |
| mcg          | Microgram                                          |
| MHRA         | Medicine and Healthcare Products Regulatory Agency |
| min          | Minutes                                            |
| MRC          | Medical Research Council                           |
| MREC         | Main Research Ethics Committee                     |
| MRI          | Magnetic resonance imaging                         |
| mTOR         | Mammalian Target of Rapamycin                      |
| M0           | Non-metastatic                                     |
| M1           | Metastatic                                         |
| NCI          | National Cancer Institute (USA)                    |
| NCRAS        | National Cancer Registration and Analysis Service  |
| NHS          | National Health Service                            |
| N0           | Node-negative                                      |
| N+           | Node-positive                                      |
| NSAID        | Non-Steroidal Anti-inflammatory Drugs              |
| NYHA         | New York Heart Association                         |
| OD           | Once per day (omne in die)                         |
| ONS          | Office for National Statistics                     |
| OS           | Overall Survival                                   |
| PATCH        | Prostate Adenocarcinoma: TransCutaneous Hormones   |
| PFS          | Progression-free survival                          |
| PHE          | Public Health England                              |
| PI           | Principal Investigator                             |
| PIS          | Patient Information Sheet                          |
| po           | Orally (per orum)                                  |
| PSA          | Prostate Specific Antigen                          |
| pts          | Patients                                           |
| PTV          | Planned Tumour Volume                              |
| QALY         | Quality-adjusted Life Years                        |
| qds          | Four times each day (quater die sumendus)          |
| QL           | Quality-of-life                                    |
| RSI          | Reference Safety Information                       |
| RTDS         | National Radiotherapy Dataset                      |

| ABBREVIATION | EXPANSION                                      |
|--------------|------------------------------------------------|
| R&D          | Research and Development                       |
| SACT         | Systemic Anti-Cancer Therapy Dataset           |
| SAE          | Serious Adverse Event                          |
| SAR          | Serious Adverse Reaction                       |
| sc           | Under skin (sub-cutaneous)                     |
| SmPC         | Summary of Product Characteristics             |
| SOC          | Standard-of-Care                               |
| SR           | Sustained-Release                              |
| SSA          | Site Specific Assessment                       |
| SUSAR        | Suspected Unexpected Serious Adverse Reactions |
| SWOG         | South West Oncology Group                      |
| tE2          | Transdermal Oestradiol                         |
| TMG          | Trial Management Group                         |
| TMT          | Trial Management Team                          |
| TEAE         | Treatment-emergent adverse event               |
| TURP         | Trans-Urethral Resection of Prostate           |
| TSC          | Trial Steering Committee                       |
| T2DM         | Type 2 Diabetes Mellitus                       |
| UCL          | University College London                      |
| ULN          | Upper Limit of Normal                          |
| U+E          | Urea and Electrolytes                          |
| WHO          | World Health Organisation                      |

| TERM                                      | DEFINITION                                                                                                                                                                                                                                                                                                                                                                                                                                                                     |
|-------------------------------------------|--------------------------------------------------------------------------------------------------------------------------------------------------------------------------------------------------------------------------------------------------------------------------------------------------------------------------------------------------------------------------------------------------------------------------------------------------------------------------------|
| ADT                                       | Androgen deprivation therapy given in the form of LHRH agonists/antagonists (abbreviated to LHRH) or alternatively, transdermal oestradiol.                                                                                                                                                                                                                                                                                                                                    |
| Anti-androgens                            | Refers to 1 <sup>st</sup> generation oral androgen receptor blockers including bicalutamide, flutamide and cyproterone. Please note that the use of cyproterone will impact on comparison-specific eligibility.                                                                                                                                                                                                                                                                |
| Comparison                                | In STAMPEDE many research treatments are evaluated and compared with participants receiving the current protocol standard-of-care. The term comparison describes the participants who have been randomised to receive research treatment and their comparable controls, each comparison is named by the research treatment e.g. the “metformin comparison” refers to all participants in arm K and the comparable non-diabetic patients contemporaneously randomised to arm A. |
| Hormone Therapy                           | Refers to all forms of hormone therapy given in the first line setting and includes LHRH, anti-androgens, transdermal oestradiol, GnRH agonists and antagonists. This term does not include novel AR-targeted agents such as abiraterone or enzalutamide.                                                                                                                                                                                                                      |
| PSA nadir                                 | For trial purposes, this refers to the lowest PSA value detected between randomisation and week 24 on trial. This is used to derive the PSA progression value.                                                                                                                                                                                                                                                                                                                 |
| Protocol research treatment               | Investigational Medicinal Products (IMPs) that are additional treatments participants allocated to research arms receive as part of the STAMPEDE protocol e.g. metformin for participants allocated to arm K, or alternative in the case of transdermal oestradiol for participants allocated to arm L.                                                                                                                                                                        |
| Protocol standard-of-care (SOC) treatment | Standard forms of background treatment which are IMPs, permitted as part of the STAMPEDE protocol which include licenced ADT (e.g. LHRH analogues) given in the setting of hormone-naïve prostate cancer and first-line use of docetaxel, abiraterone, enzalutamide or apalutamide.                                                                                                                                                                                            |
| Non-protocol treatments                   | All prostate cancer treatments given following disease progression in the management of CRPC.                                                                                                                                                                                                                                                                                                                                                                                  |
| Prednisolone                              | In Swiss sites this may be referred to as prednisone.                                                                                                                                                                                                                                                                                                                                                                                                                          |



## 1 LAY SUMMARY

STAMPEDE is a large clinical trial that aims to assess new treatment approaches for people affected by high-risk prostate cancer. The trial has been open since 2005 and has tested many different ways of treating prostate cancer and some results are now already known. Each new or alternative treatment is compared with the current standard approach, referred to as a “comparison”. More than 11,000 people have joined STAMPEDE so far with answers becoming available throughout the trial as information on life expectancy and disease control rates are gathered and compared.

New participants joining the trial from protocol v21.0 onwards may be eligible to join one of two treatment comparisons:

- The “metformin comparison” made between the control arm (arm A) who receive standard treatment only and the metformin treatment group (arm K) who receive standard treatment and metformin. **Note: randomisation is open to only a select number of sites participating in the metabolic substudy.**
- The “transdermal oestradiol comparison” made between the control arm (arm A) and the transdermal oestradiol treatment group (arm L) who receive transdermal oestradiol as an alternative form of standard hormone treatment.

Eligibility for each treatment group is dependent on several factors including the stage of prostate cancer, whether it has spread to involve other parts of the body (metastatic), and how long a patient has received hormone therapy prior to joining STAMPEDE. A computer program will be used to randomly allocate participants between all treatment groups for which they are eligible. **Table 3** summarises which treatment arms are currently open to recruitment.

Trial participants are asked whether they would like to join certain sub-studies being run alongside the trial. These aim to address several additional research questions such as what effect each treatment has on quality-of-life (QL), and which provides the greater value for money for the health service. Some sub-studies are focused on improving our understanding of the biology of prostate cancer. For example, can genetic changes be identified in prostate cancer cells that could predict which treatments might work best and may explain why some treatments stop working?

**Table 3: Summary of treatment groups currently open to recruitment (Protocol version 21.0)**

| TREATMENT BEING TESTED | TREATMENT GROUP | SUMMARY                                                                                                                                                                                                                                                                                                                                                                                                                                                                                                                                                                                                                                                                                                                                                                                                                                             | FROM PROTOCOL VERSION |
|------------------------|-----------------|-----------------------------------------------------------------------------------------------------------------------------------------------------------------------------------------------------------------------------------------------------------------------------------------------------------------------------------------------------------------------------------------------------------------------------------------------------------------------------------------------------------------------------------------------------------------------------------------------------------------------------------------------------------------------------------------------------------------------------------------------------------------------------------------------------------------------------------------------------|-----------------------|
| Metformin              | Arm K           | This anti-diabetic medication is proposed to have anti-cancer effects and may help prevent the side-effects of long-term ADT. STAMPEDE will investigate whether adding metformin to the current standard-of-care for non-diabetic people can improve life expectancy.<br><br>Please note from protocol v21 onwards only sites participating in the metabolic sub-study can recruit to Arm K.                                                                                                                                                                                                                                                                                                                                                                                                                                                        | 15.0                  |
| Transdermal oestradiol | Arm L           | This is a form of hormone treatment which can suppress testosterone as effectively as standard forms of androgen-deprivation therapy (ADT) and has been shown to avoid some of the side-effects. For example, treatment with transdermal oestradiol does not appear to cause the bone to thin, a common problem with standard forms of ADT which might lead to the bones becoming fragile (osteoporosis) and more likely to break. It may also help to avoid some of the side-effects and therefore improve overall quality of life compared with standard forms of ADT. STAMPEDE will investigate whether transdermal oestradiol can treat prostate cancer as well as current standard forms of ADT. Transdermal oestradiol is currently being tested in another large clinical trial called PATCH which already has over 1,400 men participating. | 16.0                  |

Further results are expected in the next few years from other treatments tested in STAMPEDE, which have completed recruitment, summarised in [Table 4](#).

**Table 4: Summary of treatment groups closed to recruitment; results awaited but follow-up ongoing**

| TREATMENT BEING TESTED                   | TREATMENT GROUP | SUMMARY                                                                                                                                                                                                                                                                                                                                                                                                                           | FROM PROTOCOL VERSION |
|------------------------------------------|-----------------|-----------------------------------------------------------------------------------------------------------------------------------------------------------------------------------------------------------------------------------------------------------------------------------------------------------------------------------------------------------------------------------------------------------------------------------|-----------------------|
| Abiraterone and Enzalutamide combination | Arm J           | Enzalutamide is another novel hormone treatment, similar to abiraterone, which is also used in advanced prostate cancer, when standard hormone therapy has stopped working. Enzalutamide works by blocking androgen receptors and this may complement abiraterone. STAMPEDE is testing whether this treatment combination is a more effective way of controlling prostate cancer growth for longer and improving life expectancy. | 12.0                  |

Abiraterone was tested alone in arm G and the primary results of this comparison have been presented. Follow-up is ongoing as a further longer term analysis is planned.

**Table 5: Summary of treatment group for which primary results reported but follow-up ongoing**

| TREATMENT TESTED      | TREATMENT GROUP | SUMMARY OF RATIONALE AND RESULTS                                                                                                                                                                                                                                                                                                                                                                                                                                                                                                               | PROTOCOL VERSION ADDED |
|-----------------------|-----------------|------------------------------------------------------------------------------------------------------------------------------------------------------------------------------------------------------------------------------------------------------------------------------------------------------------------------------------------------------------------------------------------------------------------------------------------------------------------------------------------------------------------------------------------------|------------------------|
| Abiraterone           | Arm G           | This is a novel hormone treatment which works by inhibiting steroid hormone synthesis so blocks prostate cancer cells from generating their own male hormones. This is thought to be a major way in which prostate cancer cells resume growth following anti-hormonal therapies. The results of STAMPEDE have shown that the addition of abiraterone with prednisone improves life expectancy and disease control or relapse rates when used earlier, for people with locally-advanced or metastatic disease.                                  | 8.0                    |
| Prostate radiotherapy | Arm H           | This is treatment with high-energy x-rays targeted to the prostate gland. This treatment is now mandatory within STAMPEDE for participants with cancer that is confined to the prostate gland as large trials have shown it improves life expectancy. The results from the primary analysis of the Arm H comparison demonstrate RT to the prostate prolonged overall survival in patients with oligometastatic (low burden) prostate cancer. Prostate RT did not provide any survival benefit to patients with high burden metastatic disease. | 9.0                    |

In the past STAMPEDE also tested whether adding docetaxel chemotherapy, zoledronic acid, or celecoxib, alone or in combination, and radiotherapy to prostate in M1 patients was beneficial in controlling prostate cancer growth and improving life expectancy. Recruitment has been completed to all of these original treatment groups, the results have been presented and it is no longer necessary to provide follow-up information relating to participants allocated to these comparisons, see [Table 6](#).

**Table 6: Summary of treatment groups reported and no longer on active follow-up**

| TREATMENT TESTED                          | TREATMENT GROUP | SUMMARY OF RATIONALE AND RESULTS                                                                                                                                                                                                                                                                                                                                                                                                                                                                                                                                                                                                                                                                                                                                            | PROTOCOL VERSION ADDED |
|-------------------------------------------|-----------------|-----------------------------------------------------------------------------------------------------------------------------------------------------------------------------------------------------------------------------------------------------------------------------------------------------------------------------------------------------------------------------------------------------------------------------------------------------------------------------------------------------------------------------------------------------------------------------------------------------------------------------------------------------------------------------------------------------------------------------------------------------------------------------|------------------------|
| Zoledronic acid                           | Arm B           | <p>Prostate cancer cells can spread to bones and weaken them. Zoledronic acid is a drug that reduces bone destruction and hardens bones.</p> <p>The results of STAMPEDE show that the addition of zoledronic acid alone does not prolong life expectancy. These results were comparable with data from other similar trials.</p>                                                                                                                                                                                                                                                                                                                                                                                                                                            | 1.0                    |
| Docetaxel                                 | Arm C           | <p>Docetaxel is a type of chemotherapy which can stop cells replicating. It has been used to treat advanced prostate cancer for some time, and is also used in e.g. the treatment of lung, breast and ovarian cancer.</p> <p>The results of STAMPEDE show that the addition of docetaxel to hormone treatment does improve life expectancy, most markedly in people with metastatic disease, and delays time to progression or relapse for people with locally-advanced and metastatic disease.</p> <p>The results of STAMPEDE were combined with other similar trials testing docetaxel and together, the results support this effect.</p> <p>Docetaxel may now be given as part of standard treatment to all suitable people entering STAMPEDE (from protocol v14.0).</p> | 1.0                    |
| Celecoxib                                 | Arm D           | <p>Celecoxib is an aspirin-like drug that is used to treat arthritis. It slows down the growth of cancer cells in the laboratory. STAMPEDE tested whether the addition of celecoxib could delay the growth of prostate cancer cells. Recruitment stopped early as an earlier analysis failed to demonstrate sufficient benefit. The final results were presented at GU ASCO 2016, a major international congress, and show that alone, celecoxib does not improve life expectancy.</p>                                                                                                                                                                                                                                                                                      | 1.0                    |
| Docetaxel and zoledronic acid combination | Arm E           | <p>The combination of these two medications did not offer any benefit to overall survival compared to the docetaxel alone.</p> <p>Currently we do not recommend this combination as treatment for HSPC in STAMPEDE</p>                                                                                                                                                                                                                                                                                                                                                                                                                                                                                                                                                      | 1.0                    |
| Zoledronic acid and celecoxib             | Arm F           | <p>The combination of these two medications did not improve overall survival in all patients randomised to this comparison. However, there was a small effect seen in patients with metastatic disease.</p> <p>Currently we do not recommend this combination as treatment for HSPC in STAMPEDE</p>                                                                                                                                                                                                                                                                                                                                                                                                                                                                         | 1.0                    |

For further information relevant to these treatment groups, refer to the STAMPEDE website where you can see earlier versions of the protocol and find summaries of the results and links to the scientific publications, [www.stampedetrial.org](http://www.stampedetrial.org).

## 2 BACKGROUND

### 2.1 INTRODUCTION AND SETTING

Prostate cancer is a major health problem world-wide and accounts for nearly one fifth of all newly-diagnosed male cancers. In the UK, approximately 47,150 people were diagnosed with prostate cancer in 2015 and over 11,000 people died from the disease (5).

#### 2.1.1 Long-term Androgen Deprivation Therapy

The initial (first-line) treatment for locally-advanced or metastatic prostate cancer is based on androgen deprivation therapy (ADT) achieved either surgically with bilateral orchidectomy, or medically with LHRH agonists or antagonists (6). Long-term use of oral anti-androgens is permitted only when given with LHRH agonists, to achieve dual androgen blockade (previously termed maximum androgen blockade - MAB).

When used alone ADT produces initial responses in up to 95% of patients but is rarely curative. STAMPEDE aims to improve outcomes for people affected by high-risk prostate cancer by testing if additional treatments added to ADT can improve disease control and life-expectancy. Data from the control arm in STAMPEDE has shown that for people with newly-diagnosed metastatic disease treated with ADT alone, the time to progression is just 11 months (6). Such progressive disease is referred to as castrate-resistant prostate cancer (CRPC).

Another important issue with ADT is the numerous associated side-effects, particularly with prolonged use. Since patients continue on LHRH after disease progression (with additional agents added), many people remain on treatment for a decade or longer. STAMPEDE is evaluating alternative forms of ADT and additional treatment with metformin aiming to mitigate some of the adverse effects of ADT which include osteoporosis (leading to an increased risk of fracture), adverse metabolic disturbance, cognitive decline, sexual dysfunction, hot flushes, physical deterioration and fatigue.

#### 2.1.2 Role Of SOC Radiotherapy

Two randomised trials, SPCG7 (7) and NCIC PR.3 / MRC PR07 (8-10) have tested the question of whether ADT alone combined with radiotherapy is the best treatment for patients with high-risk localised prostate cancer (NOMO). Both trials demonstrated an improvement in overall and disease specific survival from the addition of radiotherapy to ADT. The size of this overall survival benefit is substantial (hazard ratio 0.68 in SPCG7 and 0.77 in PR07). As these two mature, large, well-conducted randomised trials have demonstrated benefit, we now mandate that radiotherapy be standard for patients with NOMO disease (i.e. no nodal or metastatic spread). Patients with node-negative M0 prostate cancer will only be allowed to enter the trial if standard radiotherapy is planned. For patients with node-positive, M0 disease there are no randomised data on whether radiotherapy is indicated or not. However the NCIC PR.3 / MRC PR07 trial included patients with unknown nodal status who received whole pelvic radiotherapy (11) and demonstrated a large overall benefit. Additionally, non-randomised data from the STAMPEDE control arm suggests that the benefit observed in patients with NOMO disease can be extended to those with pelvic nodal involvement. Therefore the STAMPEDE TMG recommends that pelvic nodal radiotherapy be considered for patients with node-positive, M0 disease at the discretion of the treating clinician (12).

More recently, data from the "M1:RT" arm showed that in patients with oligo-metastatic disease, RT to the prostate improved overall survival (4). Therefore, the STAMPEDE TMG recommends that

prostate RT is considered for patients with oligometastatic (low burden) disease at the discretion of the treating physician.

### 2.1.3 Role Of SOC systemic therapy: docetaxel, abiraterone, enzalutamide or apalutamide in addition to ADT

A variety of trials have demonstrated that addition of systemic therapy at the start of long term ADT prolongs survival, particularly in participants with metastatic disease. On the basis of the studies described below, the STAMPEDE TMG strongly recommends the clinician to consider either docetaxel, abiraterone, enzalutamide or apalutamide in all participants with metastatic disease at presentation who are commencing ADT for the first time and are fit enough to additional treatment. Choice of which systemic therapy to use is at the discretion of the clinician, but will need to be guided by availability of each treatment at site. We also suggest site investigators keep abreast of the latest published literature to inform choices between these treatments when options are available.

The primary analysis of the "original comparisons" has shown docetaxel significantly prolongs survival (HR 0.78; 95% CI 0.66-0.93)(1). This is in support of the results of the CHAARTED trial which showed docetaxel improved survival in people with metastatic disease (13, 14). There was no evidence of heterogeneity in STAMPEDE in the treatment effect across any patient subgroups and median survival was improved by 10 months, from 71 to 81 months. In a well powered and pre-planned sub-group analysis of people with metastatic disease at randomisation the treatment effect was most apparent with a median survival benefit of 15 months.

Data from the long term follow up of the docetaxel arm, specifically in men with non-metastatic disease, demonstrate that men who had RT to the prostate without chemotherapy had a superior FFS, PFS and a trend towards better OS, compared to men treated with both (15). Therefore, although docetaxel is now permitted as part of the standard-of-care for all people entering STAMPEDE, we recommend patients with non-metastatic disease should be considered primarily for prostate RT, and chemotherapy considered only for those in whom RT is contra-indicated. Ultimately the decision is at the discretion of the treating clinician and patient.

The primary analysis of the "abiraterone comparison" has shown abiraterone improves survival in the HSPC setting (HR 0.63; 0.52 to 0.76;  $p < 0.001$ )(3). The results are consistent with the co-published LATITUDE trial which recruited an overlapping subset (newly-diagnosed high-risk metastatic patients (16)) of the population eligible for STAMPEDE. A post-hoc subgroup analysis of the metastatic HSPC participants recruited to the STAMPEDE abiraterone comparison, suggest that benefit from abiraterone was irrespective of risk stratification via "risk" or "volume" measures (17).

The ENZAMET trial (18) demonstrated that enzalutamide used alongside ADT in the metastatic HSPC setting improved overall survival (HR 0.67; 0.52 to 0.86;  $P = 0.002$ ). Where available it is acceptable to use the addition of enzalutamide to ADT on the basis of evidence of benefit. Of note, there was no additional survival benefit seen in those patients treated with both docetaxel and enzalutamide in the upfront setting, whilst this combination resulted in higher rates of peripheral sensory neuropathy.

The TITAN trial (19) demonstrated that apalutamide used alongside ADT in the metastatic HSPC improved overall survival (HR 0.67; 0.51 to 0.89;  $p = 0.005$ ).

In the absence of data supporting a combination of treatment in the upfront setting, investigators are required to specify which upfront treatment will be used. It is **not** appropriate to use a **combination** of these treatments. Therefore, from protocol v21.0 onwards, SOC use of docetaxel, **or**

abiraterone, **or** enzalutamide, **or** apalutamide is permitted at the discretion of the treating clinician and patient. The choice of SOC treatment must be selected **prior** to randomisation.

Transdermal oestradiol has not previously been used alongside abiraterone, enzalutamide or apalutamide. Therefore the first cohort of participants recruited to STAMPEDE and started on this combination will have enhanced safety monitoring, with close monitoring of hormone levels. Any concerns that an interaction between these treatments is impacting efficacy will result in a pause to recruitment whilst this is investigated. A pre-planned review of early efficacy to achieve castration will be carried out once sufficient participants have been treated with these combinations. See [Section 9.7.4](#) for further details.

## 2.2 DESIGN

STAMPEDE (also known as MRC PR08) is an innovative, multi-arm multi-stage (MAMS) randomised controlled trial open in multiple sites in the UK and Switzerland. The multi-arm design allows many treatment approaches to be tested simultaneously, and multi-stage refers to the pre-specified interim analyses that can be used to stop recruitment early to arms showing insufficient evidence of activity. The trial recruits people with high-risk locally advanced or metastatic prostate cancer, commencing long-term ADT for the first time.

The trial opened to recruitment in 2005 and initially assessed the effects of a bisphosphonate (zoledronic acid), a cytotoxic chemotherapeutic agent (docetaxel) and a cyclooxygenase (Cox-2) inhibitor (celecoxib), as single agents or combinations (arms B-F), referred to as the “original comparisons”.

Since the start of the trial, a number of new research arms have been added to STAMPEDE to evaluate:

- Abiraterone, a steroid synthesis inhibitor (arm G)
- Prostate radiotherapy for patients with newly-diagnosed metastatic disease (arm H)
- Enzalutamide, an inhibitor of androgen receptor signalling, given with abiraterone (arm J)
- Metformin, a repurposed anti-diabetic medication (arm K)
- Transdermal oestradiol, a repurposed alternative form of ADT (arm L)

## 2.3 PREVIOUSLY-REPORTED RESEARCH TREATMENTS

Data have been reported on the “original comparisons” evaluating zoledronic acid, docetaxel, celecoxib and the combination of zoledronic acid with docetaxel or with celecoxib (1, 2, 20). As such, the rationale for these treatments, along with their design and details of treatment administration, are no longer covered within this version of the protocol.

The primary survival analysis of the “abiraterone comparison” has also now been reported although these participants remain on active follow-up as subsequent analyses of long-term follow-up are planned (3). The rationale can be found in previous protocol versions, however treatment information remains as it is relevant to participants who remain on abiraterone given alone (arm G) and in combination with enzalutamide (arm J).

The primary survival analysis of the “M1:RT” comparison testing RT to the primary tumour for men with newly diagnosed metastatic prostate cancer (Arm H) has now also been reported. These patients remain on active follow-up as subsequent analyses of long term follow-up planned. The treatment information is no longer covered within this version of the protocol as all treatment has now completed, however this can be accessed via previous versions of the protocol as below.

All previous versions of the protocol are available via [www.stampedetrial.org](http://www.stampedetrial.org), please refer to:

- Protocol version 11.0 and before for information relevant to “original comparisons” (Zoledronic acid, docetaxel, celecoxib)
- Protocol version 8.0 to 13.0 for information relevant to the “abiraterone comparison”
- Protocol version version 9.0 to 15.0 for information relevant to the “M1:RT comparison”

## 2.4 COMPARISONS IN FOLLOW-UP

The rationale for comparisons that have completed recruitment and remain in follow-up can be found in previous versions of the protocol. Recruitment was completed to the “enzalutamide and abiraterone comparison” in March 2016, as the recruitment target was reached. Participants remain on treatment therefore this information remains in this protocol version.

All previous versions of the protocol are available via [www.stampedetrial.org](http://www.stampedetrial.org), please refer to:

- Protocol version 16.0 or older for details relevant to “enzalutamide & abiraterone comparison”

## 2.5 RATIONALE FOR RECRUITING COMPARISONS

### 2.5.1 Metformin

All people joining STAMPEDE are planned for long-term ADT, a treatment associated with an increased risk of insulin resistance, hyperglycaemia, dyslipidaemia and obesity. Over 50% of people receiving long-term ADT will develop metabolic syndrome resulting in increased cardiovascular morbidity and mortality (21). Obesity and high blood insulin C-peptide levels, indicating insulin resistance are independent predictors of increased prostate cancer-specific mortality and the presence of metabolic syndrome and diabetes in people treated with ADT is associated with shorter survival.

Metformin, which in non-diabetic individuals has been shown to lower the incidence of diabetes, counteracts some of these side-effects of ADT, including insulin insensitivity, hyperinsulinaemia and diabetes. It also reduces the levels of cholesterol, LDLs and triglycerides by inhibiting the fatty acid synthesis via activation of Adenosine Monophosphate Activated Kinase (AMPK) and decreases the platelet aggregation factor 1, platelet aggregation, vascular adhesion molecules, CRP and leptin (22-25). Through mitigation of the cardiovascular and metabolic consequences of ADT, metformin is proposed to reduce treatment-associated morbidity and improve all-cause mortality.

In addition, recent data has emerged consolidating the knowledge that cancer progression is linked integrally with metabolic modulators and that modification of this process by metformin has an important effect on cancer progression and survival. Pre-clinical data has shown that metformin is an important stimulator of AMPK which acts as the cellular “master switch” for energy regulation. AMPK acts to inhibit the effects of elevated insulin levels which promote metastasis, tumour growth and treatment resistance. Insulin increases mRNA and protein expression of steroidogenic enzymes leading to the up-regulation of intracellular testosterone levels, secreted androgens, thereby activating the AR (26). Metformin also influences the PI3K-AKT pathway and has an anti-proliferative effect via inhibitor of mTOR as well as targeting cancer stem cells. In vitro, metformin has been shown to inhibit androgen-induced IGF-IR up-regulation through disruption of androgen signalling (27).

Evidence in support of this includes a systematic review and meta-analysis of 13,008 people with type 2 diabetes mellitus (T2DM) and concurrent cancer which has shown improved survival in people treated with metformin compared with other anti-diabetic agents. In a systematic review of



observational data from over 1 million people, there was a significant association seen between metformin and decreased risk of death from any cancer. Another systematic review found that the use of metformin in diabetic patients was associated with a significantly lower risk of cancer incidence and cancer mortality (28). In a large retrospective cohort study of 3837 diabetic people with prostate cancer, metformin was associated with a decreased risk of prostate cancer specific mortality (HR=0.76 [0.64-0.89]) and death (HR=0.76 [0.70-0.82]). In a prospective non-randomised phase II study in non-diabetic CRPC patients, 36% of patients receiving metformin were progression-free at 3 months and >50% had a prolongation of their PSA doubling time (29).

In summary, metformin is proposed to mitigate many of the adverse side-effects of long-term ADT as well as having multiple potential anti-cancer effects and therefore STAMPEDE will evaluate re-purposing this treatment as a novel therapeutic approach in the management of high risk locally-advanced or metastatic prostate cancer.

## 2.5.2 Transdermal Oestradiol

### 2.5.2.A Background & Rationale

ADT with LHRH analogue injections suppresses testosterone to castrate levels, but also depletes oestradiol, since around 80% of oestradiol in men is derived by aromatisation from testosterone. Thus men who are treated with LHRHa will have toxicities caused by low levels of both testosterone and oestrogen. The LHRH-associated toxicities which are due to low testosterone include loss of libido, erectile dysfunction and decrease in muscle mass. Other toxicities associated with LHRHa such as osteoporosis, increased fracture risk, hot flushes, memory loss, dyslipidemia and increased body fat deposition are thought to be due to oestradiol deficiency. In particular, the adverse effect of LHRHa on bone health has been well documented. Oestradiol deficiency prolongs the life-span of bone-resorptive osteoclasts, with the resulting imbalance between osteoclasts and bone-forming osteoblasts increasing the rate of bone thinning. This may lead to osteoporosis and increased risk of fracture, with the rate of fracture increasing with duration of LHRHa (30).

Transdermal oestradiol is a potential alternative to LHRHa that may avoid some treatment-related side-effects, therefore improving quality-of-life, which would be advantageous if shown to be equally effective at prolonging survival. Exogenous administration of oestradiol suppresses androgen production through a negative feedback loop involving the hypothalamic-pituitary axis, whilst avoiding the fall in oestradiol associated with castrate levels of testosterone (31). This, in turn, mitigates the toxicities of LHRH associated with oestradiol deficiency. Oral oestrogen was previously used for ADT before the development of LHRHa, but discontinued as first-line treatment due to increased thromboembolic toxicity, attributable to first-pass hepatic metabolism (32).

Parenteral administration (e.g. intravenous, intramuscular or transdermal oestradiol) avoids first-pass hepatic metabolism, mitigating the cardiovascular risk, as supported by results so far from the ongoing PATCH (Prostate Adenocarcinoma TransCutaneous Hormones [MRC PR09; ISRCTN70406718]) trial and previous studies evaluating parenteral oestradiol in the form of intramuscular polyestradiol phosphate (31, 33).

To date, there are a number of encouraging results from the PATCH trial demonstrating the safety and early activity of transdermal oestradiol compared to LHRH agonists in people with advanced hormone-naïve prostate cancer (see [Appendix I](#) for further details). In particular, similar rates of cardiovascular events have been observed in the transdermal oestradiol and LHRHa arms, as well as equivalent rates of testosterone suppression (based on around 900 patients enrolled up to Oct-2015) (31). Transdermal oestradiol has been shown to avoid the loss in bone mineral density associated with LHRHa, and results in improved metabolic profiles and quality-of-life compared to LHRHa (34). Furthermore, a pre-planned, confidential, interim analysis of the PATCH trial in Jun-2013 based on progression-free survival (PFS) led to the trial being extended to phase III; that analysis

included n=638 participants with 206 PFS events, reviewed against a pre-specified non-inferiority margin hazard ratio of 1.25 and 1-sided alpha 0.25. The phase III evaluation of clinical efficacy for transdermal oestradiol will be based on progression-free and overall survival as co-primary outcome measures.

Demonstrating that transdermal oestradiol is an equally effective approach to ADT would provide a globally important alternative (to LHRHa), with the potential to reduce treatment-associated morbidity and improve quality-of-life. In addition, there is a possibility that transdermal oestradiol may improve overall survival compared to standard hormone therapy. First, transdermal oestradiol may reduce treatment-associated morbidity and could potentially benefit overall survival. Second, up to 30% of people with castrate-resistant prostate cancer respond to oral oestrogen as post-relapse therapy, suggesting oestradiol may potentially have additional direct anti-tumour effects (35).

#### **2.5.2.B Meta-Analysis With PATCH Trial**

To further assess the clinical efficacy of transdermal oestradiol, the relevant data from the “transdermal oestradiol comparison” within STAMPEDE will be combined with data from patients recruited into PATCH, i.e. the “transdermal oestradiol comparison” within STAMPEDE is not sufficiently powered to form a stand-alone analysis. The evaluation of transdermal oestradiol will be based on a non-inferiority approach (in contrast to the other comparisons within STAMPEDE which are superiority questions), to test the hypothesis that transdermal oestradiol is at least as effective as standard hormone therapy, but with fewer side-effects.

Recruitment of patients to the “transdermal oestradiol comparison” through STAMPEDE enables the transdermal oestradiol research question to be answered more quickly than via PATCH alone. It also reduces the number of participants allocated standard treatment alone in both trials, thereby increasing the proportion of participants receiving a novel treatment approach and improving trial efficiency.

As of Feb-2017, nearly 1,200 participants had been recruited directly to the PATCH trial (also coordinated by MRC CTU at UCL) for the phase III evaluation of clinical efficacy of transdermal oestradiol. The overall recruitment target for the transdermal oestradiol evaluation is approximately 2,500 participants (including around 700 to be recruited through STAMPEDE).

## 3 SELECTION OF INSTITUTIONS AND INVESTIGATORS

Sites who wish to participate in STAMPEDE should be registered with the MRC CTU at UCL for this purpose. Before any participants are randomised, the CTU must receive a completed and signed Investigator Statement. The STAMPEDE Investigator Statement is signed by the Principal Investigator for that institution (download from <http://www.stampedetrial.org/>). The return of the Investigator Statement will be taken as confirmation of agreement to adhere to the trial protocol. In addition, a fully-signed model agreement is also required before recruitment can begin.

In compliance with the principles of GCP, all institutions participating in the trial will complete a delegation log and forward this to the CTU. Each person working on the STAMPEDE trial must sign off a section of this log indicating their responsibilities. The CTU must be notified of any changes to trial personnel and/or their responsibilities and an updated delegation log needs to be sent in to the CTU. An up-to-date copy of this log must be stored in the Investigator Site file at the institution and also at the CTU.

The Clinical Trial Authorisation (CTA) for the STAMPEDE trial requires that the Medicines and Healthcare Products Regulatory Agency (MHRA) be supplied with the names and addresses of all participating investigators/institutions. Trial staff at the CTU will perform this task; hence, it is vital to receive full contact details for all investigators prior to their entering participants.

Following substantial amendments and new comparisons opening, sites will be notified of relevant documents and training required and if and when they are able to participate. Further accreditation packs may be circulated as a result to update trial documentation.

### 3.1 SITE/INVESTIGATOR CRITERIA

#### 3.1.1 Principle Investigator's Qualifications & Agreements

1. The investigator(s) should be qualified by education, training, and experience to assume responsibility for the proper conduct of the trial at their site and should provide evidence of such qualifications through an up-to-date curriculum vitae and/or other relevant documentation requested by the Sponsor, the REC, the IRB, and/or the regulatory authorities.
2. The investigator must hold a long term contract with their site. Locum members of staff cannot fill the role of Principle Investigator (PI).
3. The investigator should be thoroughly familiar with the appropriate use of the investigational products, as described in the protocol, current Investigator Brochure or Summary of Product Characteristics and in other information sources provided by the Sponsor.
4. The investigator should be aware of, and should comply with, the principles of GCP and the applicable regulatory requirements. A record of GCP training should be accessible for all investigators.
5. The investigator/site should permit monitoring and auditing by the Sponsor, and inspection by the appropriate regulatory authorities.

6. The investigator should maintain a delegation log of appropriately-qualified persons to whom the investigator has delegated significant trial-related duties.
7. The investigator should sign an investigator statement, which verifies that the site is willing and able to comply with the requirements of the trial.

### **3.1.2 Adequate Resources**

1. The investigator should be able to demonstrate a potential for recruiting the required number of suitable subjects within the agreed recruitment period (that is, the investigator regularly treats the target population).
2. The investigator should have sufficient time to properly conduct and complete the trial within the agreed trial period.
3. The investigator should have available an adequate number of qualified staff and adequate facilities for the foreseen duration of the trial to conduct the trial properly and safely. In addition, the investigator should arrange for suitably qualified investigator cover for safety reporting in the event of their absence.
4. The investigator should ensure that all persons assisting with the trial are adequately informed about the protocol, the investigational products, and their trial-related duties and functions.
5. The site should have sufficient data management resources to allow prompt data return to the CTU.

## **3.2 COMPARISON-SPECIFIC SITE ACCREDITATION**

### **3.2.1 Transdermal Oestradiol Comparison: arms A & L**

Only UK sites participating in STAMPEDE will be accredited for the “transdermal oestradiol comparison”.

### 3.3 REQUIRED TRIAL DOCUMENTATION

Table 7 presents a summary of the required trial documentation for participating sites. Templates are provided on the STAMPEDE website, [www.stampedetrial.org](http://www.stampedetrial.org).

**Table 7: Trial documentation required for participating sites**

| TRIAL DOCUMENTATION                                                                          | TIMING                    |
|----------------------------------------------------------------------------------------------|---------------------------|
| Confirmation of capacity and capability (including IRMER approval)                           | Before site participation |
| Signed Investigator Statement                                                                | Before site participation |
| Signature list & delegation of responsibilities                                              | Before site participation |
| Trial personnel contact details                                                              | Before site participation |
| Participant information sheets (PIS), GP Letter & Informed consent form (ICF) on local paper | Before site participation |
| Signed Clinical Trial Agreement between Trust and Sponsor (or Variation if applicable)       | Before site participation |
| Site initiation training                                                                     | Before site participation |
| Signed Pharmacy Pack acknowledgment                                                          | Before site participation |

## 4 SELECTION OF PARTICIPANTS

### 4.1 IDENTIFYING POTENTIAL TRIAL PARTICIPANTS

STAMPEDE recruits participants with high-risk prostate cancer who are commencing long-term androgen-deprivation therapy (defined as at least 2 years) for the first time. All participants must fulfil one of the following **broad disease categories**:

- High-risk newly-diagnosed non-metastatic, node-negative disease
- Newly-diagnosed metastatic or node-positive disease
- Previously radically treated, now relapsing with high risk features

See [Section 4.4](#) for detailed category inclusion criteria

### 4.2 APPROACH TO INFORMED CONSENT

Potential participants should be provided with information about STAMPEDE at the earliest opportunity to allow sufficient time to consider their participation and complete the required screening procedures to determine comparison-specific eligibility.

Informed consent is an ongoing process and participants must be made aware that refusal to take part in all or any aspect of the trial at any time for any reason is permitted, without incurring any consequence or impact on their standard treatment. All aspects of the trial e.g. sub-studies should be presented and optional participation discussed, and investigators are encouraged to adopt a staged approach where possible to avoid information overload.

Original signed consent forms must be stored in the site investigator file, a copy stored in the patient's medical notes (electronic/paper), and a copy provided to the participant. For central monitoring purposes an anonymised copy must also be sent to the CTU, refer to [Section 10.1.1](#).

#### 4.2.1 Screening Investigations Prior To Randomisation

All participants must have the following examinations performed to confirm eligibility prior to randomisation. Please note, all screening investigations should be recent such that they reflect the participant's current disease status.

The following imaging is always required within 6 months (184 days) prior to randomisation:

- Cross-sectional imaging (CT, MRI, PSMA-PET-CT or Choline-PET-CT) of pelvis and abdomen, SPECT-CT is not sufficient
- AND Bone Scan (or equivalent e.g. whole body MRI, or SPECT-CT)
- AND Chest X-ray (only if chest was not included in cross sectional imaging i.e. CT, Choline-PET-CT or PSMA-CT-PET which would be preferable; MRI imaging of chest is not sufficient on its own)

Please note, for trial purposes M1 disease will be defined using internationally agreed criteria, therefore M1 staging cannot be based solely on PET avid lesions. To be considered M1, the metastatic lesion must also be visible on standard imaging i.e. CT (can be CT component of PET-CT) or bone scan.

The following blood tests are required within **6 months (184 days)** prior to randomisation:

- Pre-hormone treatment PSA

- Pre-hormone treatment Testosterone (if available)

The following bloods and additional measurements are required within **4 weeks (28 days)** prior to randomisation:

- Haematology: Full blood count\*
- Biochemistry: Liver function tests, serum creatinine
- Systolic and diastolic blood pressure
- Waist circumference measurement
- Weight and height

The following bloods and additional measurements are required within **2 weeks (14 days)** prior to randomisation:

- Baseline PSA

\* If a participant has started SOC docetaxel please use a full blood count measured shortly prior to chemotherapy. This means in the setting of SOC docetaxel these results provided should be from within the last 16 weeks (112 days) prior to randomisation. This will ensure an appropriate baseline is reviewed to confirm fitness for treatment and eligibility for participants. For all other participants the blood count used should be taken within 4 weeks prior to randomisation.

Participants who initially fail to meet the trial eligibility criteria can be re-screened at a later date if timelines permit.

#### **4.2.2 Baseline Investigations required for participants allocated to arms A, K, L**

The following blood tests and additional measurements are required at baseline **within 4 weeks (28 days)** prior to randomisation:

- HbA1c (for participants being considered for metformin comparison)
- Glucose and triglycerides (preferably fasting for metabolic analysis, but if only able to obtain a non-fasting result please record on randomisation CRF)
- Lipid profile (fasting or non-fasting; total cholesterol, LDL and HDL)

See **Table 2** for a detailed schedule of assessments for all participants randomised to arms A, K or L.

We encourage site investigators to carry out any additional investigations they feel are necessary in particular cases to ensure that participants are appropriately fit to be randomised in the STAMPEDE trial.

### **4.3 PRIOR PERMITTED SOC TREATMENTS**

#### **4.3.1 Hormone Treatment Prior To Randomisation**

From protocol v16.0, participants can potentially be randomised to the “transdermal oestradiol comparison” and it would be preferable for these participants to have had as little exposure to ADT as possible.

Within the separate PATCH trial, participants are randomised within 8 weeks after starting anti-androgens and cannot have received an LHRHa injection. This approach is also favoured in STAMPEDE, but participants who have received a single 4-week (or 1-month) LHRHa injection remain eligible, as shown in **Table 8**.

Anti-androgen monotherapy is not permitted as a form of long-term hormone therapy but initial use is encouraged to meet the eligibility criteria for the “transdermal oestradiol comparison”. Anti-

androgens may include flutamide or bicalutamide, however use of cyproterone will mean the participant is ineligible for arm L (36).

**Table 8: Maximum prior hormone therapy**

| TIME CONSIDERATIONS                      | PRIOR ANTI-ANDROGENS | PRIOR LHRH | PRIOR SOC ABIRATERONE, ENZALUTAMIDE OR APALUTAMIDE | ELIGIBLE FOR INCLUSION TO |
|------------------------------------------|----------------------|------------|----------------------------------------------------|---------------------------|
| Maximum duration – all arms except Arm L | 14 weeks             | 12 weeks   | 12 weeks                                           | A:K                       |
| Arm L                                    | ≤8 weeks             | ≤4 weeks   | Nil                                                | A:L                       |

**Permitted prior hormone therapy for now-relapsing disease:** Any patients now presenting with relapsed disease, previously treated with adjuvant or neo-adjuvant hormone therapy alongside their radical surgery or radiotherapy, must have completed that period of hormone therapy **at least 12 months** before joining STAMPEDE and it must have been **no longer than 12 months in duration**.

#### 4.3.2 Standard-Of-Care (SOC) Radiotherapy

In participants with NOM0, N+M0 and oligometastatic disease (as per M1RT definition (4), see [Section 6.1.3](#)), the treating clinician and participant must have decided, **prior** to randomisation, whether prostate radiotherapy will be given as part of SOC.

#### 4.3.3 Standard-Of-Care (SOC) Systemic Therapy; docetaxel, abiraterone, enzalutamide or apalutamide

The treating clinician and participant must have decided, **prior** to randomisation, whether docetaxel, abiraterone, enzalutamide or apalutamide is to be given as part of SOC.

Please note that only one SOC treatment can be selected at randomisation. See [Section 6.1.4](#) for treatment details.

Investigators should aim to start SOC docetaxel treatment within 12 weeks after starting ADT, consistent with the timelines achieved for research arm C. Participants may start docetaxel treatment prior to randomisation. See [Section 6.1.3](#) for treatment details.

If SOC docetaxel treatment was not commenced prior to randomisation and participants are subsequently allocated to receive transdermal oestradiol (Arm L), it is recommended that docetaxel treatment commences **after** participants have been established on transdermal oestradiol for around 4 weeks, when most participants are likely to have completed the induction period (see [Section 6.2.5.A](#)).

Participants may start abiraterone, enzalutamide or apalutamide prior to randomisation. However the use of these treatments prior to randomisation will impact comparison-specific eligibility. At present participants who have **already started** these treatments will only be eligible for the “metformin comparison”. Patients **planned** for these treatments can be considered for both metformin and transdermal oestradiol comparisons.

At present, there are no safety data available on the use of abiraterone, enzalutamide or apalutamide in combination with transdermal oestradiol. The initial cohort of participants randomised to receive transdermal oestradiol and planned for SOC abiraterone, enzalutamide or apalutamide will be subject to additional CTU review to monitor these combinations, and an additional early pre-planned analysis of safety.



When complete, the findings will be reviewed by the relevant committees and sites will be advised as to whether these combinations can continue. If found to be safe in the upfront setting then we will also thereafter permit the use of the medications alongside transdermal oestradiol patches in the CRPC setting.

#### **4.4 GENERAL INCLUSION CRITERIA – DISEASE CATEGORIES**

Participants must fulfil all the criteria in one of the following three categories:

##### **4.4.1 High-Risk Newly-Diagnosed Non-Metastatic Node-Negative (N0/Nx) Disease**

Both:

- At least two of: T category T3/4, PSA $\geq$ 40ng/ml or Gleason sum score 8-10
- Intention to treat with radical radiotherapy (unless there is a contra-indication)

OR

##### **4.4.2 Newly-Diagnosed Metastatic Or Node-Positive Disease**

At least one of:

- Stage T<sub>any</sub> N+ M0
- Stage T<sub>any</sub> N<sub>any</sub> M+

OR

##### **4.4.3 Previously Radically Treated, Now Relapsing (Prior Radical Surgery And/or Radiotherapy)**

At least one of:

- PSA  $\geq$ 4ng/ml and rising with doubling time less than 6 months
- PSA  $\geq$ 20ng/ml
- N+
- M+

AND

#### **4.5 GENERAL INCLUSION CRITERIA REQUIRED FOR ALL PARTICIPANTS**

- I. Histologically confirmed prostate adenocarcinoma
- II. Intention to treat with long-term androgen deprivation therapy
- III. Fit for all protocol treatment<sup>1</sup> and follow-up, WHO performance status 0-2<sup>2</sup>
- IV. Have completed the appropriate investigations prior to randomisation
- V. Adequate haematological function: neutrophil count  $\geq$ 1.5x10<sup>9</sup>/l and platelets  $\geq$ 100x10<sup>9</sup>/l
- VI. Adequate renal function, defined as GFR  $\geq$ 30ml/min/1.73m<sup>2</sup>
- VII. Written informed consent
- VIII. Willing and expected to comply with follow-up schedule
- IX. Using effective contraceptive method if applicable

<sup>1</sup> Medical contraindications to the trial medications are given in [Section 6](#)

<sup>2</sup> For WHO performance status definitions see [Appendix A](#)

## 4.6 GENERAL EXCLUSION CRITERIA

- I. Prior systemic therapy for locally-advanced or metastatic prostate cancer (except as listed in [Section 4.3](#)<sup>1</sup>)
- II. Prior exposure to hormone therapy for a duration of > 12 months, or prior exposure completing < 12 months before randomisation (see [Section 4.3.1](#) for permitted prior exposure details)
- III. Metastatic brain disease or leptomeningeal disease
- IV. Abnormal liver functions consisting of any of the following:
  - Serum bilirubin  $\geq 1.5 \times$  ULN (except for participants with Gilbert's disease, for whom the upper limit of serum bilirubin is  $51.3 \mu\text{mol/l}$  or  $3 \text{mg/dl}$ )
  - Aspartate aminotransferase (AST) or alanine aminotransferase (ALT)  $\geq 2.5 \times$  ULN - site must indicate at randomisation whether one or both tests are performed at site. Where both results are available, both must confirm eligibility.
- V. Any other previous or current malignant disease which, in the judgement of the responsible clinician, is likely to interfere with STAMPEDE treatment or assessment
- VI. Any surgical wound (e.g. TURP) which in the judgement of the responsible clinician may interfere with or be exacerbated by protocol treatment
- VII. Participants with significant cardiovascular disease, including:
  - Severe/unstable angina
  - Myocardial infarction less than 6 months prior to randomisation
  - Arterial thrombotic events less than 6 months prior to randomisation
  - Clinically significant cardiac failure requiring treatment, defined as New York Heart Association (NYHA) class II or above<sup>2</sup>
  - Cerebrovascular disease (e.g. stroke or transient ischaemic episode) less than 6 months prior to randomisation
  - Any other significant cardiovascular disease that in the investigator's opinion means the participant is unfit for any of the study treatments.

<sup>1</sup> Details timelines for recently initiated SOC docetaxel, abiraterone, enzalutamide, apalutamide

<sup>2</sup> NYHA classifications can be found in Appendix A

## 4.7 COMPARISON-SPECIFIC ELIGIBILITY CRITERIA

In addition to the general inclusion and exclusion criteria, the following comparison-specific eligibility criteria apply.

### 4.7.1 Metformin Comparison (randomisation between arm A and arm K)

Please note from protocol v21 only patients willing to participate in the metabolic sub study should be randomised to the metformin comparison. The sub study will be conducted in a limited number of sites, see [section 4.7.4](#) for further information.

In addition to the general inclusion and general exclusion criteria the following comparison-specific inclusion criteria must be met to be eligible for randomisation to the "metformin comparison":

- Hb A1c <48mmol/mol (equivalent to <6.5%)
- Adequate renal function, defined as GFR  $\geq$ 45ml/min/1.73m<sup>2</sup> (except for Switzerland<sup>1</sup>)
- No history of lactic acidosis or predisposing conditions
- No current or previous treatment with metformin
- No current or previous medication for treatment of diabetes
- No contraindications to metformin
- Willingness to join the metabolic sub study

The method used to determine glomerular filtration rate may vary according to local practice. Equations that either estimate glomerular filtration rate (eGFR) or creatinine clearance (CrCl) may be used and the same threshold value applies. Where possible, HbA1c should be performed prior to commencing SOC docetaxel to reduce the likelihood of corticosteroid-related hyperglycaemia impacting on eligibility. All participants with abnormal baseline HbA1c (i.e. 6.5% or higher) should be informed and referred to their GP for further management.

### 4.7.2 Transdermal Oestradiol Comparison (randomisation between arm A and arm L)

In addition to the general inclusion and exclusion criteria, participants fulfilling all of the following are eligible for the "transdermal oestradiol comparison":

- $\leq$ 8 weeks of anti-androgen (AR-antagonists) use
- Maximum of 1 dose of monthly or 4-weekly LHRH agonist/antagonist
- No prior LHRH agonist injection with a stated duration of effect greater than 1 month
- $\leq$ 12 weeks since first dose of any hormone therapy
- Not had a bilateral orchidectomy
- No use of cyproterone acetate prior to randomisation
- No known porphyria
- No history of radiologically confirmed deep vein thrombosis or pulmonary embolism
- No known thrombophilic disorder (e.g. Protein C, Protein S, antithrombin deficiency)
- Not yet started SOC abiraterone, enzalutamide or apalutamide (see [Section 4.3.4](#) for information)

<sup>1</sup> Switzerland sites - please refer to SAKK appendix for local guidance

## 4.8 SUB-STUDY ELIGIBILITY CRITERIA

There are currently four sub-studies that aim to further the understanding of the biology of prostate cancer through additional genetic analyses and correlation with clinical data. For details on each sub-study, see [Section 17.2](#).

### 4.8.1 Eligibility for germline DNA sub-study (Saliva samples)

All newly randomised trial participants who join arms A, K or L are asked to provide a saliva sample from which germline (inherited) DNA can be extracted.

Participants randomised from **15-Nov-2011** onwards who consented to provide a blood spot (Consent Form version 4.0 part K) can also be retrospectively approached to provide a saliva sample providing they have received the REC-approved letter explaining the need for additional saliva sample collection as the DNA extraction using the blood spot method did not work as well as anticipated.

For further information please refer to the [Sample collection and handling manual](#).

### 4.8.2 Eligibility for the circulating tumour DNA sub-study (sequential blood samples)

This sub-study is not recruiting currently. For details relating to blood sample collection for patients already participating in the sub-study, including eligibility criteria and shipping refer to the [Sample collection and handling manual](#).

### 4.8.3 Eligibility for tumour sample analysis (FFPE blocks)

All newly randomised trial participants should be provided with the STAMPEDE Additional Research Participant Information Sheet in order to consider optional donation of remaining diagnostic prostate cancer tissue stored as formalin fixed paraffin embedded (FFPE) blocks.

The criteria for enrolment into the FFPE block collection:

- Newly randomised STAMPEDE participants
- Informed consent to gift remaining tissue to be used for additional research analyses

Tumour blocks will only need to be sent for a select subset of STAMPEDE patients. For more details, please refer to the [Sample collection and handling manual](#).

### 4.8.4 Eligibility for metformin metabolic sub-study

All newly randomised trial participants who meet the eligibility criteria to join the A/K comparison are eligible to join the metformin metabolic sub-study, if the site where they are being treated is participating in this sub-study. A limited number of sites will be recruiting for this sub-study. Selected sites involved have volunteered and demonstrated they have sufficient resources to undertake the metabolic sub-study.

Participants who are eligible for randomisation to the metformin comparison must be willing to take part in the metabolic sub-study and be able to adhere to the blood sample schedule. Appropriate consent to the additional blood samples must be provided.

## 5 RANDOMISATION AND ENROLMENT

### 5.1 RANDOMISATION

Participant eligibility will be confirmed during the randomisation process and participants will be allocated to any of the open research comparisons for which they are eligible (see [Section 4.6](#)). To randomise a participant please carefully complete the Randomisation CRF and then contact the CTU.

#### RANDOMISATION

Call MRC CTU at UCL, Monday to Friday 0900-1700  
Excluding public holidays or dates when notice has been given by the CTU.  
Tel: +44 (0) 20 7670 4777

A trial ID and treatment will be allocated and given over the phone and by email confirmation. In addition, a letter confirming these details will be sent. The trial ID will be the primary way in which the participant will be identified and should be used in all correspondence. Sites should send a letter to the participant's GP to inform them of their trial participation and treatment allocation. The GP letter is supplied as a template and can be downloaded from the trial website [www.stampedetrial.org](http://www.stampedetrial.org).

The randomisation CRF, eligibility checklist and anonymised consent form\* must be submitted to the CTU following randomisation.

*\*Anonymised consent forms are not required to be submitted for Swiss participants.*

### 5.2 CO-ENROLMENT GUIDELINES

#### Interventional clinical trials

STAMPEDE participants should not join any other interventional clinical trials of prostate cancer treatment until the following criteria have been met:

- The participant has experienced at least one failure-free survival (FFS) event
- The participant is no longer on any STAMPEDE research treatment that is permitted to continue post first progression e.g. metformin, abiraterone or enzalutamide

Once both criteria are satisfied the participant may be entered into further treatment studies evaluating treatments for CRPC.

Site investigators should check with the CTU prior to participants commencing any IMP within an **interventional clinical trial** for any other medical condition, such as a new malignancy, to ensure there are no concerns about interactions with STAMPEDE treatments. Note that STAMPEDE treatment can be continued alongside **non-trial treatments** for a new malignancy providing local pharmacy review to ensure there are no interactions.

The primary outcome measure of STAMPEDE is overall survival, therefore follow-up must continue after co-enrolment (unless the participant withdraws consent). Participation in interventional studies must be reported to CTU on the Co-enrolment CRF. Details of any interventional treatments received post-progression in such studies must be reported on the Additional Treatment Log.

**Non-interventional clinical trials**

Co-enrolment in non-interventional studies for any indication is permitted at any time providing that it does not interfere with treatment or assessment in STAMPEDE. This does **not** require reporting using the Co-enrolment CRF which captures details of interventional prostate cancer clinical trials only.

Data sharing agreements with “downstream” trials are encouraged to improve data quality in both trials and to reduce costs to both organisations.

## 6 TREATMENT OF PARTICIPANTS

### 6.1 STANDARD-OF-CARE (SOC)

The SOC for this patient group is **androgen deprivation therapy** (ADT) as per local practice (see [Section 6.1.1](#)). For some participant groups, this should now be supplemented with SOC radiotherapy (see [Section 6.1.2](#)). From protocol v14.0 onwards, SOC docetaxel is permitted for all suitable participants. From protocol v19.0 onwards, SOC abiraterone is also permitted as an alternative to docetaxel, where this is available. From protocol v21.0 onwards SOC enzalutamide and apalutamide are also permitted as an alternative to docetaxel or abiraterone, where these are available, (see [Section 6.1.4](#)).

| SOC combinations                                | Metformin comparison | Transdermal oestradiol comparison |
|-------------------------------------------------|----------------------|-----------------------------------|
| ADT alone                                       | Yes                  | Yes                               |
| ADT + prostate RT +/- nodal RT                  | Yes                  | Yes                               |
| ADT + docetaxel                                 | Yes                  | Yes                               |
| ADT + docetaxel + RT                            | Yes                  | Yes                               |
| ADT + abiraterone/enzalutamide/apalutamide      | Yes                  | Yes*                              |
| ADT + abiraterone/enzalutamide/apalutamide + RT | Yes                  | Yes*                              |

\*See section [7.1.5.C](#) for guidelines for submitting hormone treatment logs – please send as quickly as possible to facilitate safety monitoring of combination.

#### 6.1.1 Androgen Deprivation Therapy

The planned duration of ADT should be **at least 2 years** and lifelong in those with metastatic disease. With the exception of those allocated to transdermal oestradiol (Arm L), all participants will receive ADT as per local practice to achieve castrate levels of testosterone. The method of planned or current long-term standard-of-care ADT must be specified prior to randomisation. See below for the permitted methods of ADT and see [Section 4.3.1](#) for more information on ADT timing before randomisation. Participants allocated to Arm L will go on to receive transdermal oestradiol in place of standard ADT methods.

##### 6.1.1.A Bilateral Orchiectomy

Operations should be performed by appropriately trained surgeons. A total or sub-capsular orchiectomy may be performed. Participants having a bilateral orchiectomy are required to adhere to the same timelines for prior LHRH and/or anti-androgen exposure as specified in [Section 4.3.1](#). Note, bilateral orchiectomy is an exclusion criteria for the “transdermal oestradiol” comparison, see [section 4.6.2](#).

##### 6.1.1.B LHRH Agonists e.g. goserelin, leuprorelin

LHRH agonists used according to local practice. The prophylactic use of anti-androgens to prevent tumour “flare” is recommended.

##### 6.1.1.C LHRH Antagonists e.g. degarelix

LHRH antagonists used according to local practice. The use of prophylactic use of anti-androgens to prevent tumour “flare” is not necessary.

#### **6.1.1.D Dual Androgen Blockade**

Long-term use of anti-androgens alongside LHRH agonists, according to local practice. Note this was previously referred to as maximum androgen blockade. Anti-androgen monotherapy is not deemed an androgen deprivation regimen.

### **6.1.2 SOC Radiotherapy to prostate**

#### **6.1.2.A NOMO Participants**

Investigators should give standard RT to participants with node-negative, non-metastatic disease (NOMO), in accordance with data from the PR07 and SPCG trials (7, 10). If RT is contra-indicated this must be recorded on the Randomisation CRF. See [Section 6.1.3](#) for further details of RT administration.

#### **6.1.2.B N+M0 Participants**

For participants with node-positive, M0 disease there are no randomised data on whether radiotherapy is indicated or not. However the NCIC PR.3 / MRC PR07 trial included participants with unknown nodal status who received whole pelvic RT (11) and demonstrated a large overall benefit. Additionally, non-randomised data from the STAMPEDE control arm (Arm A) suggests that the benefit observed in participants with NOMO disease can be extended to those with pelvic nodal involvement. Therefore, the STAMPEDE TMG recommends that pelvic nodal RT be considered for participants with node-positive, M0 disease at the discretion of the treating clinician (12).

#### **6.1.2.C Oligometastatic Participants**

For participants with oligometastatic disease, data from the M1:RT arm supports the use of RT to the prostate (4). Currently, data strongly supports the use of prostate RT in men with up to 3 bone metastases and/or lymph node only disease, however we are aware that ongoing analyses may redefine which patients benefit from this treatment. Therefore, the STAMPEDE TMG recommends that prostate +/- pelvic nodal RT be considered for participants with oligometastatic disease, with the treating clinician to determine whether the participant has oligometastatic disease that they deem likely to benefit from this treatment.

#### **6.1.2.D Planned Use Of SOC RT**

Suitability for RT is assessed by the treating clinicians. Investigators will be asked to state their intention with regards to planned RT in this group at randomisation. Intention to give RT (or not) for **all** participants must be stated at randomisation to ensure that there is no bias towards particular combinations of systemic therapy with RT.

SOC RT administration is not being investigated as part of the trial, therefore only minimal data about SOC RT will be collected. It is accepted that some participants will develop progressive disease before RT can be administered and if this occurs the reasons for non-delivery of treatment must be recorded on the Radiotherapy Detail CRF.

### **6.1.3 Administration of SOC RT**

Standard radiotherapy will be given to appropriate participants in each of the trial arms, following a period of neo-adjuvant ADT therapy, as is generally standard in UK practice. For participants with negative nodes on axial imaging, clinicians may choose between irradiating prostate and seminal vesicles alone or including the pelvic nodes in addition. Additional staging tests such as pelvic node sampling may be considered in making this decision. Conformal or intensity modulated radiotherapy should be used in all participants. Where participants have good clinical evidence that nodes are free of tumour or participants for whom nodal radiotherapy is contra-indicated (e.g. significant bowel disease), treatment may be given to the prostate gland and seminal vesicles only. The recommended dose is 74Gy in 37 fractions to the prostate and seminal vesicles or the equivalent using hypo-



fractionated schedule, 60Gy in 20 fractions. Alternative dosing schedules are permitted but must be agreed with the STAMPEDE Trial Management Group (TMG).

#### 6.1.3.A Standard-Of-Care RT Timing

If receiving docetaxel as part of the standard-of-care (permitted from protocol v14.0), the participant must have sufficiently recovered from any docetaxel toxicity before RT can begin. In all other participants not receiving SOC docetaxel, SOC RT may be started sooner (2-6 months post-randomisation) consistent with the data from the MRC PR07 trial (11).

#### 6.1.4 SOC upfront systemic therapy: docetaxel, abiraterone, enzalutamide or apalutamide

Docetaxel, abiraterone, enzalutamide or apalutamide may be considered for use as SOC treatments, provided the treatment is available locally. Choice of which systemic therapy to use is at the discretion of the clinician. However, we suggest site investigators keep abreast of the emerging literature to inform choices between these treatments, when options are available.

From protocol v14.0 investigators may consider giving docetaxel as part of the SOC for participants with newly-diagnosed metastatic disease, based on the survival benefit demonstrated by both STAMPEDE in the primary analysis of the "original comparisons" and CHARTED (13) (14, 20). Investigators may also consider giving docetaxel to participants with high-risk locally-advanced disease.

From protocol v19.0 onwards, the treating clinician and participant may consider the use of abiraterone in the newly diagnosed setting, where this is available.

From protocol v21.0 onwards the treating clinician and participant can also consider the alternate options to use enzalutamide or apalutamide in the newly diagnosed setting, if available.

The treating clinician and participant must have decided **prior** to randomisation if SOC docetaxel, abiraterone, enzalutamide or apalutamide is to be given to ensure use is balanced between control and treatment arms. Treatment with SOC systemic therapy may start prior to randomisation, except in Arm L when abiraterone, enzalutamide or apalutamide cannot have started prior to starting trial treatment. In addition, for participants allocated to Arm L who have not already started SOC docetaxel prior to randomisation, it is recommended that docetaxel commences around 4 weeks after starting research treatment (see [Section 6.2.5](#)).

In the absence of data supporting the routine use of concurrent or sequential use in the absence of disease progression, investigators are required to specify which SOC treatment will be used (i.e.: **one** of docetaxel, abiraterone, enzalutamide or apalutamide) and may **not** plan to use a combination of these. In the case that SOC treatment is changed from one agent to another in order to manage toxicity/intolerance (as per current national guidelines) please update the SOC Systemic Treatment CRF.

We recommend starting SOC systemic therapy within 12 weeks of initiation of ADT. This timing is consistent with the time-scale for starting treatment within the aforementioned clinical trials.

Docetaxel is given according to local protocols as a standard non-trial treatment. The regime used previously within STAMPEDE (Arm C and Arm E) was 75mg/m<sup>2</sup> Day 1 as 1hr IV infusion, plus prednisolone 5mg BID for 21 days repeated every 3 weeks for a maximum of 6 cycles. GCSF use is at the investigator's discretion; prednisolone may be omitted.

Abiraterone, enzalutamide or apalutamide should be given according to local protocols as a standard non-trial treatment. Currently abiraterone, enzalutamide and apalutamide are funded differently by the NHS dependent on burden of disease and which country the participant is being treated in; follow national guidelines for duration and management of therapy once available.

The dosing, safety monitoring and toxicity management contained within the STAMPEDE protocol refers to research abiraterone and enzalutamide given to participants previously allocated to Arms G or J, but may be used as a guide if required. The protocol guidelines for abiraterone were based on the recommendations from the manufacturers, which are included in the summary of product characteristics and can be found online. Similarly, for dosing, safety monitoring and toxicity management of enzalutamide and apalutamide consider referring to the summary of product characteristics produced by the manufacturers, and any local or national guidelines available.

A SOC Systemic Treatment CRF should be completed for all participants randomised to STAMPEDE regardless of whether any SOC systemic therapy was planned. See [Section 7.2.3](#) for details of data collection for SOC Systemic Treatment.

## 6.2 RESEARCH TREATMENTS

Research treatment durations are outlined below with a separate section for each individual Investigational Medicinal Product (IMP) detailing the cautions and contraindications, interactions, safety monitoring and toxicity clinical management.

### 6.2.1 Treatment Duration

**Table 9: Intended treatment duration – All arms**

| RANDOMISED ARM AND TREATMENT            | TREATMENT DURATION IS DEPENDENT ON DISEASE STATE                                                                                             |                                                                                                                                                                                                                      |                                                                                                                                                                                                                      |
|-----------------------------------------|----------------------------------------------------------------------------------------------------------------------------------------------|----------------------------------------------------------------------------------------------------------------------------------------------------------------------------------------------------------------------|----------------------------------------------------------------------------------------------------------------------------------------------------------------------------------------------------------------------|
|                                         | M0 WITH PLANNED RADICAL TREATMENT <sup>1</sup>                                                                                               | M0 WITH NO PLANNED RADICAL TREATMENT <sup>1</sup>                                                                                                                                                                    | M1                                                                                                                                                                                                                   |
| Arm A: SOC androgen deprivation therapy | Minimum 2 years                                                                                                                              | Continue lifelong                                                                                                                                                                                                    | Continue lifelong                                                                                                                                                                                                    |
| Arm G: Abiraterone                      | 2 years - <i>unless progression occurs before (see Table 10)</i>                                                                             | Continue until all categories of disease progression have occurred (see Table 10)                                                                                                                                    | Continue until all categories of disease progression have occurred (see Table 10)                                                                                                                                    |
| Arm J: Abiraterone and enzalutamide     | 2 years - <i>unless progression occurs before (see Table 10)</i>                                                                             | Continue until all categories of disease progression have occurred (see Table 10)                                                                                                                                    | Continue until all categories of disease progression have occurred (see Table 10)                                                                                                                                    |
| Arm K: Metformin                        | Minimum 3 years (continue for 12 months after the last injection of LHRHa to allow for the delay in testosterone levels returning to normal) | Continue lifelong as long as the investigator feels it is in the best interests of the participant.                                                                                                                  | Continue lifelong as long as the investigator feels it is in the best interests of the participant.                                                                                                                  |
| Arm L: Transdermal oestradiol (TE2)     | Minimum 2 years – <i>unless progression occurs before (see Table 10)</i>                                                                     | Continue until disease progression at which point it is the site investigators prerogative to choose whether to continue TE2 or change to LHRHa. (see Table 10 for additional details on treatment post-progression) | Continue until disease progression at which point it is the site investigators prerogative to choose whether to continue TE2 or change to LHRHa. (see Table 10 for additional details on treatment post-progression) |

<sup>1</sup> For trial purposes: Report the planned duration of trial treatment based on the intention at the time of randomisation, i.e.: based on plans for radical RT. **However** if the treatment received is different from that planned, please ensure treatment the participant receives reflects the most appropriate duration:

E.g.: NOMO patient does not receive planned RT > treat with lifelong ADT as per “M0 with no radical treatment”  
 NOMO patient receives RT that was not planned > treat with minimum 2 years ADT as per “M0 with radical treatment”

**Table 10: Management of trial treatment post progression**

Continues on next page.

| RANDOMISED TREATMENT                    | POST-PROGRESSION: HOW TO MANAGE TRIAL TREATMENT                                                                                                                                                                                                                                                                                                                                       |                                                                                                                                                                                                                                                           |                                                                                                                                                                                                                                                                                                                                                                                       |    |
|-----------------------------------------|---------------------------------------------------------------------------------------------------------------------------------------------------------------------------------------------------------------------------------------------------------------------------------------------------------------------------------------------------------------------------------------|-----------------------------------------------------------------------------------------------------------------------------------------------------------------------------------------------------------------------------------------------------------|---------------------------------------------------------------------------------------------------------------------------------------------------------------------------------------------------------------------------------------------------------------------------------------------------------------------------------------------------------------------------------------|----|
|                                         | M0 WITH RADICAL TREATMENT - PROGRESSES WHILST STILL ON ADT                                                                                                                                                                                                                                                                                                                            | M0 WITH RADICAL TREATMENT - PROGRESSES AFTER COMPLETING 2 YEARS ADT                                                                                                                                                                                       | M0 WITH <u>NO</u> RADICAL TREATMENT                                                                                                                                                                                                                                                                                                                                                   | M1 |
| Arm A: SOC androgen deprivation therapy | Participants who progress before completing 2 years of ADT should continue with ADT. <i>ADT after progression is not considered a trial protocol treatment.</i>                                                                                                                                                                                                                       | M0 participants who progress after stopping ADT at 2 years, should restart ADT. <i>ADT after progression is not considered a trial protocol treatment.</i>                                                                                                | <i>Continue ADT post-progression but ADT is no longer considered a trial protocol treatment.</i>                                                                                                                                                                                                                                                                                      |    |
| Arm G: Abiraterone                      | Continue until <u>all</u> types of progression reported: <ul style="list-style-type: none"> <li>PSA progression (as defined in section 7.1.3.A)</li> <li>Radiological progression</li> <li>Clinical progression</li> </ul> However, if the participant starts second-line treatment before meeting all progression types, abiraterone must be stopped <sup>1</sup> .                  | If the site clinician wishes to retreat with abiraterone this must be done following national guidelines for use in the CRPC setting. <i>Re-treating with abiraterone in the CRPC setting is not a trial protocol treatment.</i>                          | Continue until <u>all</u> types of progression reported: <ul style="list-style-type: none"> <li>PSA progression (as defined in section 7.1.3.A)</li> <li>Radiological progression</li> <li>Clinical progression</li> </ul> However, if the participant starts second-line treatment before meeting all progression types, abiraterone must be stopped <sup>1</sup> .                  |    |
| Arm: J Abiraterone and enzalutamide     | Continue until <u>all</u> types of progression reported: <ul style="list-style-type: none"> <li>PSA progression (as defined in section 7.1.3.A)</li> <li>Radiological progression</li> <li>Clinical progression</li> </ul> However, if the participant starts second-line treatment before meeting all progression types, abiraterone and enzalutamide must be stopped <sup>1</sup> . | If the site clinician wishes to retreat with abiraterone or enzalutamide this must be done following national guidelines for use in the CRPC setting. Re-treating with abiraterone or enzalutamide in the CRPC setting is not a trial protocol treatment. | Continue until <u>all</u> types of progression reported: <ul style="list-style-type: none"> <li>PSA progression (as defined in section 7.1.3.A)</li> <li>Radiological progression</li> <li>Clinical progression</li> </ul> However, if the participant starts second-line treatment before meeting all progression types, abiraterone and enzalutamide must be stopped <sup>1</sup> . |    |

<sup>1</sup>Participants may continue on abiraterone or abiraterone and enzalutamide if they receive radiotherapy on a single occasion for a skeletal-related event

|                                        | POST-PROGRESSION: HOW TO MANAGE TRIAL TREATMENT                                                                                                                                                                                                                                                                                                                                                                                                                                                                                                                                                                                                                                                                                                                                 |                                                                                                                                                                                                                                                                                                                                           |                                                                                                                                                                                                                                                                                                                                                                          |    |
|----------------------------------------|---------------------------------------------------------------------------------------------------------------------------------------------------------------------------------------------------------------------------------------------------------------------------------------------------------------------------------------------------------------------------------------------------------------------------------------------------------------------------------------------------------------------------------------------------------------------------------------------------------------------------------------------------------------------------------------------------------------------------------------------------------------------------------|-------------------------------------------------------------------------------------------------------------------------------------------------------------------------------------------------------------------------------------------------------------------------------------------------------------------------------------------|--------------------------------------------------------------------------------------------------------------------------------------------------------------------------------------------------------------------------------------------------------------------------------------------------------------------------------------------------------------------------|----|
| RANDOMISED TREATMENT                   | M0 WITH RADICAL TREATMENT - PROGRESSES WHILST STILL ON ADT                                                                                                                                                                                                                                                                                                                                                                                                                                                                                                                                                                                                                                                                                                                      | M0 WITH RADICAL TREATMENT - PROGRESSES AFTER COMPLETING 2 YEARS ADT                                                                                                                                                                                                                                                                       | M0 WITH <u>NO</u> RADICAL TREATMENT                                                                                                                                                                                                                                                                                                                                      | M1 |
| Arm K:<br>Metformin                    | Continue metformin post-progression.<br>Post-progression metformin should be continued for as long as the investigator feels it is in the best interests of the participant.<br>Metformin can be given alongside any second-line treatment for prostate cancer. However, if another trial with any IMP is started in the second-line setting, metformin must be stopped.                                                                                                                                                                                                                                                                                                                                                                                                        | If progression occurs after stopping ADT but while metformin continues, (i.e. progression within the first 12 months of stopping ADT), continue metformin post-progression.<br>If progression occurs after metformin has stopped (i.e. progression >12 months after the last administration of LHRHa), metformin should not be restarted. | Continue metformin post-progression.<br>Post-progression metformin should be continued for as long as the investigator feels it is in the best interests of the participant.<br>Metformin can be given alongside any second-line treatment for prostate cancer. However, if another trial with any IMP is started in the second-line setting, metformin must be stopped. |    |
| Arm L:<br>Transdermal oestradiol (TE2) | Continuing treatment with TE2 or change to LHRHa is at the discretion of the treating clinician.                                                                                                                                                                                                                                                                                                                                                                                                                                                                                                                                                                                                                                                                                | Restart treatment with TE2 or LHRHa, the choice is at the discretion of the treating clinician.                                                                                                                                                                                                                                           | Continuing treatment with TE2 or changing to LHRHa is at the discretion of the treating clinician.                                                                                                                                                                                                                                                                       |    |
|                                        | TE2 can be used in combination with docetaxel, cabazitaxel and radium in the CRPC setting. We are currently evaluating the combination of abiraterone, enzalutamide and apalutamide alongside TE2 in the upfront setting. If this is proven to be safe and effective then sites will be informed and it will thereafter also be allowed in the CRPC setting. In the meantime if you wish to use abiraterone, enzalutamide or apalutamide in the CRPC setting the participant must change to LHRHa.<br>For participants who are on the 3 patch maintenance dose and have castrate levels of testosterone, there is currently no evidence that increasing the number of patches further once the participant has progressed would be beneficial and is therefore not recommended. |                                                                                                                                                                                                                                                                                                                                           |                                                                                                                                                                                                                                                                                                                                                                          |    |

## 6.2.2 Research Abiraterone + Prednisolone (relevant to Arms G & J)

Note: recruitment has closed to all research comparisons containing abiraterone; that is Arm G (SOC + abiraterone) and Arm J (SOC + enzalutamide + abiraterone).

Participants allocated to Arm G or Arm J will receive abiraterone:

- Arm G: abiraterone alone (taken with prednisolone), in addition to SOC ADT
- Arm J: abiraterone (taken with prednisolone) in combination with enzalutamide, in addition to SOC ADT

### 6.2.2.A Abiraterone: Clinical particulars – posology and administration

Abiraterone is administered as a single 1000mg daily oral dose (4 tablets to be taken together once a day).

Abiraterone should be taken with prednisolone 5mg (or prednisone 5mg in Switzerland) daily to prevent secondary mineralocorticoid excess. See [Section 6.2.2.H](#) for further details on prednisolone (and prednisone).

Abiraterone absorption is increased by food therefore should be taken on an empty stomach without food. The tablets should be taken at least 2 hours after food, swallowed whole with water. No food should be eaten for 1 hour afterwards.

### 6.2.2.B Abiraterone: Clinical particulars - treatment duration

See [Table 9](#) for details. See [Section 7.1.3](#) for further information on the trial definition of progression.

### 6.2.2.C Abiraterone: Safety monitoring

: Hypokalaemia, hepatic impairment and hypertension

Abiraterone may cause:

- Hypokalaemia, due to secondary mineralocorticoid excess; this can be counteracted by co-prescription of prednisolone
- Increased liver enzymes and hepatotoxicity
- Hypertension

Regular monitoring of blood serum potassium, LFTs and blood pressure are therefore required whilst on treatment. Requirements for STAMPEDE are provided in [Table 11](#). Safety monitoring requirements are consistent with the approach adopted in the LATITUDE trial in which abiraterone was evaluated in high-risk metastatic hormone-naïve prostate cancer (16) and the abiraterone Investigator Brochure (38).

In summary:

- **Two weekly** monitoring of potassium, LFTs and BP for the **first 12 weeks**
- **Monthly** monitoring of potassium, LFTs and BP from **12 weeks until 1 year**
- **After 1 year** safety monitoring of potassium, LFTs and BP can reduce to **two monthly** if the site investigator thinks it is safe and appropriate to do so.

**Table 11: Safety monitoring for participants receiving research abiraterone**

Note: In acute toxicity monitoring requirements may increase – see toxicity tables for additional advice.

| Adverse event of interest | Monitoring Required               | Frequency of monitoring whilst on abiraterone alone or in combination with enzalutamide treatment in the trial setting |                     |                                                                                                                                                                                                                                                                              |
|---------------------------|-----------------------------------|------------------------------------------------------------------------------------------------------------------------|---------------------|------------------------------------------------------------------------------------------------------------------------------------------------------------------------------------------------------------------------------------------------------------------------------|
|                           |                                   | Weeks 0 – 12                                                                                                           | Week 12 – 12 months | 12 months – end of treatment                                                                                                                                                                                                                                                 |
| Hypokalaemia              | Blood serum potassium*            | Every 2 weeks                                                                                                          | Monthly             | Participants may have the frequency of monitoring reduced to every 2 months*** if judged appropriate by the investigator.<br><br>Continued monthly monitoring is required for participants if there are concerns related to research abiraterone causing hypokalaemia.       |
| Hepatic impairment        | LFTs (ALT or AST, and bilirubin)* | Every 2 weeks                                                                                                          | Monthly             | Participants may have the frequency of monitoring reduced to every 2 months*** if judged appropriate by the investigator.<br><br>Continued monthly monitoring is required for participants if there are concerns related to research abiraterone causing hepatic impairment. |
| Hypertension              | Blood pressure**                  | Every 2 weeks                                                                                                          | Monthly             | Participants may have the frequency of monitoring reduced to every 2 months*** if judged appropriate by the investigator.<br><br>Continued monthly monitoring is required for participants if there are concerns related to research abiraterone causing hypertension.       |

\* Blood tests may be taken in the community or by a GP surgery, however the results must be reviewed contemporaneously by the trial team. It is not acceptable to wait until the participant's next oncology appointment before these are reviewed.

\*\*Blood pressure may be monitored using documented self-monitoring or via the GP providing this is reviewed at each follow up.

\*\*\*Based on advice from Janssen, product IB/SmPC and LATITUDE protocol (16)

**:: Hypokalaemia - additional notes**

Abiraterone may cause hypokalaemia due to secondary mineralocorticoid excess, this can be counteracted by co-prescription of prednisolone (see management of hypokalaemia Table 14).

After the first 12 months, provided the site investigator feels it is appropriate and safe to do so, it is permissible for patients to be prescribed 3 months of abiraterone. As above, safety monitoring needs to be completed at 2 monthly intervals and these results need to be monitored at the time they are available to ensure it is safe for the patient to continue taking their trial medications.

**:: Hepatic impairment – additional notes**

Abiraterone treatment can be associated with increased liver enzymes and hepatotoxicity, therefore regular monitoring of LFTs is required whilst on treatment. LFTs should include ALT or AST, and

bilirubin. If clinical symptoms or signs suggestive of hepatotoxicity develop, serum transaminases, in particular ALT, should be measured immediately (see management of abnormal LFTs [Table 15](#)).

After the first 12 months, provided the site investigator feels it is appropriate and safe to do so it is permissible for patients to be prescribed 3 months of abiraterone. As above, safety monitoring needs to be completed at 2 monthly intervals and these results need to be monitored at the time they are available to ensure it is safe for the patient to continue taking their trial medications.

#### **:: Blood pressure management – additional notes**

Abiraterone may cause hypertension. Investigators are required to ensure blood pressure is performed and reviewed. , it is acceptable for this to be documented self-monitoring or via the GP providing this is reviewed at each follow-up. For the management of abiraterone-induced hypertension see [Table 13](#).

#### **6.2.2.D Abiraterone: Cautions and contra-indications**

- Unusual or allergic reaction to past abiraterone treatment
- Uncontrolled hypertension
- Uncontrolled heart failure
- Active or chronic liver disease

#### **:: Cardiovascular history**

Abiraterone should be used with caution in participants with a history of cardiovascular disease. The safety of abiraterone in participants with left ventricular ejection fraction <50% or New York Heart Association (NYHA) Class III or IV heart failure has not been established. Before treatment with abiraterone, hypertension must be controlled and hypokalaemia must be corrected.

Caution is required in treating participants whose underlying medical conditions might be compromised by increases in blood pressure, hypokalaemia, or fluid retention, e.g. those with heart failure, recent myocardial infarction, or ventricular arrhythmia.

#### **:: Renal impairment**

No dose adjustments are required in renal impairment; however, caution is advised if participants develop severe renal impairment as there is limited clinical data in this population. Systemic exposure to abiraterone after a single oral 1000mg dose did not increase in participants with end-stage renal disease on dialysis.

#### **6.2.2.E Abiraterone: Special warnings**

##### **:: Overdose**

Human experience of overdose with abiraterone is limited. There is no specific antidote to abiraterone. In the event of an overdose, administration of abiraterone should be with-held and general supportive measures undertaken, including monitoring for cardiac arrhythmias, liver function and electrolytes.

#### **6.2.2.F Abiraterone: Interactions (medications)**

Details on drug interactions are described in [Table 12](#) provides a summary on the main interactions.

#### **:: Anti-androgens**

Abiraterone is steroid synthesis inhibitor and should not be given together with any other anti-androgens given the risk of toxicity. Cyproterone acetate should be discontinued 10 days and finasteride stopped 48 hours before commencing abiraterone. Concomitant use of any anti-androgen including dutasteride, bicalutamide, flutamide and tamoxifen is not recommended.

Participants receiving or planned for dual androgen blockade (DAB) at randomisation should not continue anti-androgens if randomised to receiving abiraterone.

**:: Spironolactone**

Spironolactone binds to the androgen receptor, may increase PSA levels and is associated with abiraterone resistance therefore concomitant use is **contraindicated**.

**:: Statins and medicinal products associated with myopathy/rhabdomyolysis**

Myopathy has occurred in patients treated with abiraterone, typically this occurs when first initiating treatment and resolves when abiraterone is stopped. Caution is recommended in participants receiving concomitant treatments with medicinal products known to be associated with myopathy/rhabdomyolysis e.g. statins.



**Table 12: Drugs that may interact with abiraterone**

| DRUGS WHICH MAY REDUCE ABIRATERONE LEVELS              |                   |                                                                  |                                                                                                                                                                                                                                                                                                                                                                                         |
|--------------------------------------------------------|-------------------|------------------------------------------------------------------|-----------------------------------------------------------------------------------------------------------------------------------------------------------------------------------------------------------------------------------------------------------------------------------------------------------------------------------------------------------------------------------------|
| Substrate                                              | Clinical Use      | Drug                                                             | Recommendation                                                                                                                                                                                                                                                                                                                                                                          |
| CYP3A4 inducers                                        | Anti-epileptics*  | Phenytoin<br>Carbamazepine<br>Phenobarbital<br>Primadone (39)    | Avoid unless no therapeutic alternative, due to risk of decreased exposure to abiraterone.                                                                                                                                                                                                                                                                                              |
|                                                        | Anti-depressants  | St Johns Wart                                                    |                                                                                                                                                                                                                                                                                                                                                                                         |
|                                                        | Anti-TB           | Rifampicin<br>Rifabutin<br>Rifapentine                           |                                                                                                                                                                                                                                                                                                                                                                                         |
| DRUGS WHICH MAY INCREASE ABIRATERONE LEVELS            |                   |                                                                  |                                                                                                                                                                                                                                                                                                                                                                                         |
| Substrate                                              | Clinical Use      | Drug                                                             | Recommendation                                                                                                                                                                                                                                                                                                                                                                          |
| CYP3A4 inhibitors                                      | Anti-retroviral   | Atazanavir<br>Saquinavir<br>Ritonavir<br>Indinavir<br>Nelfanavir | Whilst PK studies of other CYP3A4 inhibitors did not indicate a clinically meaningful interaction, there are no specific studies of assessing an abiraterone - anti-retroviral interaction. If it is not possible to avoid the use of anti-retrovirals it would be prudent to have an awareness of a potential for an interaction and monitor for adverse effects from abiraterone.(40) |
|                                                        | Anti-fungal       | Ketoconazole                                                     | PK studies suggest no clinically meaningful impact of interaction                                                                                                                                                                                                                                                                                                                       |
| DRUGS WHICH MAY ACCUMULATE WHEN GIVEN WITH ABIRATERONE |                   |                                                                  |                                                                                                                                                                                                                                                                                                                                                                                         |
| Substrate                                              | Clinical Use      | Drug                                                             | Recommendation                                                                                                                                                                                                                                                                                                                                                                          |
| CYP2D6                                                 | Cardiac           | Metoprolol<br>Propranolol<br>Propafenone<br>Flecainide           | Clinical vigilance required as drug levels may increase with abiraterone use, consider a dose reduction of medicinal products metabolised by CYP2D6.                                                                                                                                                                                                                                    |
|                                                        | Anti-depressants  | Desipramine<br>Venlafaxine<br>Citalopram                         |                                                                                                                                                                                                                                                                                                                                                                                         |
|                                                        | Anti-psychotics   | Haloperidol<br>Risperidone                                       |                                                                                                                                                                                                                                                                                                                                                                                         |
|                                                        | Analgesia         | Tramadol<br>Codeine<br>Oxycodone                                 |                                                                                                                                                                                                                                                                                                                                                                                         |
|                                                        | Alpha blockers    | Tamsulosin (41)                                                  |                                                                                                                                                                                                                                                                                                                                                                                         |
|                                                        | Anti-diabetic     | Repaglinide (42)<br>Pioglitazone                                 |                                                                                                                                                                                                                                                                                                                                                                                         |
|                                                        | Cough suppressant | Dextromethorpan                                                  |                                                                                                                                                                                                                                                                                                                                                                                         |

\*narrow therapeutic index

### 6.2.2.G Abiraterone Undesirable Effects

The most common adverse drug reactions observed in the integrated safety data for those participants who received 1000mg abiraterone plus prednisone or prednisolone in clinical studies (n=1,070) were fatigue, arthralgia, peripheral oedema, back pain, bone pain, nausea, constipation, hypokalemia and anaemia.

The adverse events graded as Grade 3 or Grade 4 and which occurred in more than 5% of participants were fatigue, peripheral oedema, anaemia and back pain(38).

In the event of a toxicity not listed below clinicians should use their clinical judgement and take appropriate measures to treat the participant, including interruption of research treatment and/or implementing dose modifications if required. Please update treatment logs with any changes. Contact the MRC CTU for further advice if required.

**Table 13: Management of abiraterone-associated hypertension (given alone or with enzalutamide)**

| TOXICITY EVENT                                                                      | ACTION                                                                                                                                                                                                                                                                                                                                                                                                                                     |
|-------------------------------------------------------------------------------------|--------------------------------------------------------------------------------------------------------------------------------------------------------------------------------------------------------------------------------------------------------------------------------------------------------------------------------------------------------------------------------------------------------------------------------------------|
| BP repeatedly in range of 120-139/80-89 mmHg                                        | <b>Continue abiraterone (and enzalutamide).</b><br>Management as per investigator.                                                                                                                                                                                                                                                                                                                                                         |
| BP repeatedly in range of 140-159/90-99 mmHg                                        | <b>Continue abiraterone (and enzalutamide).</b><br>Management as per investigator with anti-hypertensive treatment. Follow local guidance for selection of anti-hypertensives but avoid thiazide diuretics to minimise risk of serum potassium derangement. Calcium channel antagonists or beta blockers are often preferred.<br><br>As with other symptoms of mineralocorticoid excess, consider increasing prednisolone dose to 5mg BID. |
| BP repeatedly $\geq$ 160/100 mmHg or life-threatening consequences of hypertension) | <b>Withhold abiraterone and enzalutamide.</b><br>Adjust or add anti-hypertensive medications to mitigate the toxicity. When blood pressure resolves to being predominantly <140/90 or baseline, resume both abiraterone and enzalutamide at full dose with prednisolone 5mg bid.                                                                                                                                                           |

Record hypertension grade as per CTCAE on the follow-up form if required. If a patient experiences ongoing hypertension that the treating clinician deems clinically concerning then consider referral to cardiologist or hypertension clinic.

**Table 14: Management of abiraterone associated hypokalaemia (given alone or with enzalutamide)**

| TOXICITY EVENT                                                                   | ACTION                                                                                                                                                                                                                                                                                                                                                                                                            |
|----------------------------------------------------------------------------------|-------------------------------------------------------------------------------------------------------------------------------------------------------------------------------------------------------------------------------------------------------------------------------------------------------------------------------------------------------------------------------------------------------------------|
| Grade 1<br>(<LLN – 3.0mmol/L)                                                    | <b>Continue abiraterone (and enzalutamide).</b><br>Supplement with oral potassium and monitor closely and increase prednisolone dose to 5mg BID.<br><br>Exclude and manage other causes of hypokalemia.                                                                                                                                                                                                           |
| Grade 2<br>(<LLN – 3.0mmol/L and symptomatic)                                    | <b>Withhold abiraterone (continue enzalutamide).</b><br>Supplement with oral potassium and monitor closely and increase prednisolone dose to 5mg BID.<br><br>Exclude and manage other causes of hypokalemia.<br><br>Re-start abiraterone with close monitoring, discontinue if recurs.                                                                                                                            |
| Grade 3<br>(<3.0 – 2.5mmol/L)<br>or Grade 4<br>(<2.5mmol/L and life-threatening) | <b>Permanent discontinuation of abiraterone</b> and hospitalisation for intravenous potassium replacement and cardiac monitoring.<br><br>After the return of serum potassium to normal, prednisolone (prednisone in Switzerland) should also be discontinued.<br><br>The participant can continue on enzalutamide alone. If hypokalaemia persists, consider a dose reduction of enzalutamide to 120mg once a day. |

**Table 15: Management of abnormal LFTs associated with abiraterone (given alone or with enzalutamide)**

| TOXICITY EVENT                                                                                                                                                | ACTION                                                                                                                                                                                                                                                                                                                                                                                                                                                                                                                                                                                     |
|---------------------------------------------------------------------------------------------------------------------------------------------------------------|--------------------------------------------------------------------------------------------------------------------------------------------------------------------------------------------------------------------------------------------------------------------------------------------------------------------------------------------------------------------------------------------------------------------------------------------------------------------------------------------------------------------------------------------------------------------------------------------|
| <p><b>Grade 1</b> increases in AST, ALT or bilirubin (e.g. increase in AST or ALT from ULN to 3.0X ULN; increase in total bilirubin from ULN to 1.5X ULN)</p> | <p><b>Continue abiraterone (and enzalutamide).</b></p> <p>Increase frequency of LFT monitoring to at least weekly, if the investigator judges that the laboratory abnormalities are potentially related to study medication.</p> <p>Providing LFTs are stable for 4 weeks, resume normal LFT monitoring.</p>                                                                                                                                                                                                                                                                               |
| <p><b>Grade 2</b> increases in AST, ALT or bilirubin (e.g. increase in AST or ALT to &gt;3.0-5.0X ULN; increase in total bilirubin from &gt;1.5-3.0X ULN)</p> | <p><b>Withhold abiraterone, enzalutamide</b> and all other concomitant medications that are potentially hepatotoxic.</p> <p>Increase frequency of LFT monitoring to at least weekly until the LFTs return to baseline value or Grade 1, when both abiraterone and enzalutamide can be re-started.</p> <p>Enzalutamide can be re-started with no dose reduction.</p> <p>Abiraterone can be re-started with no dose reduction after one episode, providing this resolved within 4 weeks.</p> <p>Dose reduction should be considered if Grade 2 derangements persist or recur; see below.</p> |
| <p><b>Grade 3</b> increases in AST, ALT or bilirubin (e.g. increase in AST or ALT to &gt;5.0X ULN; increase in total bilirubin to &gt;3.0X ULN),</p>          | <p><b>Withhold abiraterone and enzalutamide</b> and all other concomitant medications that are potentially hepatotoxic.</p> <p>Immediately increase the frequency of LFT monitoring to at least weekly until the LFTs return to baseline value or Grade 1.</p> <p>Enzalutamide can be re-started with no dose reduction.</p> <p>Abiraterone can be re-started with dose reduction to 250mg once toxicities resolved to Grade 1 or baseline. This dose can be titrated as per liver function blood tests.</p>                                                                               |
| <p><b>Grade 4</b> increases in AST, ALT or bilirubin (e.g. increase in AST or ALT to &gt;20.0X ULN; increase in total bilirubin to &gt;10.0X ULN)</p>         | <p><b>Immediate discontinuation of abiraterone and enzalutamide.</b></p> <p>Increase the frequency of LFT monitoring to at least weekly until the LFTs return to baseline value or Grade 1.</p> <p>Prednisone can then be discontinued and the investigator can consider restarting enzalutamide.</p> <p>Abiraterone should not be re-introduced.</p>                                                                                                                                                                                                                                      |
| SCENARIO                                                                                                                                                      | ACTION                                                                                                                                                                                                                                                                                                                                                                                                                                                                                                                                                                                     |
| <p>Recurrent or persistent Grade 2 AST, ALT, or bilirubin derangement</p>                                                                                     | <p><b>Withhold abiraterone and enzalutamide</b> and all other concomitant medications that are potentially hepatotoxic.</p> <p>Once LFTs return to Grade 1 restart abiraterone at 250mg and titrate upwards, guided by weekly blood tests.</p>                                                                                                                                                                                                                                                                                                                                             |
| <p>Second episode of Grade 3 AST, ALT or bilirubin derangement</p>                                                                                            | <p><b>Withhold abiraterone and enzalutamide</b> and all other concomitant medications that are potentially hepatotoxic.</p> <p>Immediately increase LFT monitoring at least weekly is required, continue until returned to baseline values or Grade 1.</p> <p>Recommence enzalutamide initially. If abiraterone resumption is then considered, resume study treatment with abiraterone dose starting at 250mg and titrate upwards guided by LFTs</p>                                                                                                                                       |
| <p>Third episode of Grade 3 AST, ALT or bilirubin derangement</p>                                                                                             | <p>Permanently discontinue abiraterone.</p> <p>Prednisone can then be discontinued and the investigator can consider restarting enzalutamide.</p>                                                                                                                                                                                                                                                                                                                                                                                                                                          |

An opinion from a hepatologist should be considered if there are any concerns or liver function derangement shows no improvement within 2 weeks of discontinuation of abiraterone.

**Table 16: Management of fluid retention/oedema associated with abiraterone (given alone or with enzalutamide)**

| TOXICITY EVENT | ACTION                                                                                                                                                                                                                                                                                                                                                                                                                            |
|----------------|-----------------------------------------------------------------------------------------------------------------------------------------------------------------------------------------------------------------------------------------------------------------------------------------------------------------------------------------------------------------------------------------------------------------------------------|
| Grade 1-2      | <b>Continue abiraterone (and enzalutamide).</b><br>Increase prednisolone dose to 5mg bid.                                                                                                                                                                                                                                                                                                                                         |
| Grade 3-4      | <b>Withhold abiraterone. Enzalutamide can be continued.</b><br>Consider addition of mineralocorticoid receptor antagonist eplerenone until resolution of symptoms. When fluid retention/oedema returns to baseline or resolves to ≤Grade 1, resume abiraterone at full dose with prednisone 5mg bid.<br>If symptoms do not resolve abiraterone should not be re-started and enzalutamide should be dose reduced to 120mg per day. |

**Table 17: Management of diarrhoea (associated with abiraterone or enzalutamide)**

| TOXICITY EVENT | ACTION                                                                                                                                                                                                                                                                                                                                                                                                                                                                                   |
|----------------|------------------------------------------------------------------------------------------------------------------------------------------------------------------------------------------------------------------------------------------------------------------------------------------------------------------------------------------------------------------------------------------------------------------------------------------------------------------------------------------|
| Grade 1-2      | <b>Continue abiraterone and enzalutamide.</b><br>Symptomatic management.                                                                                                                                                                                                                                                                                                                                                                                                                 |
| Grade 3-4      | <b>Withhold abiraterone.</b> Enzalutamide can be continued in the first instance.<br>If no improvement from withholding abiraterone alone, reduce dose of enzalutamide to 120mg per day.<br>If still no improvement reduce dose of enzalutamide to 80mg. If diarrhoea persists despite this (and it is believed symptoms are caused by abiraterone or enzalutamide) we recommend the patient stops trial treatment<br>Once resolved to Grade 1, recommence abiraterone at 750mg per day. |

#### 6.2.2.H Abiraterone: Prednisolone (prednisone in Switzerland)

The co-administration of prednisolone (prednisone in Switzerland) 5mg once daily is required whilst receiving abiraterone to prevent secondary mineralocorticoid excess.

Prednisolone should be taken as a single dose with food in the morning. If mineralocorticoid-related toxicities occur (e.g., hypokalaemia, hypertension, peripheral oedema) the prednisolone dose should be reviewed. See [Table 13](#), [Table 14](#) and [Table 16](#) for advice on when an increase to 5mg BID is recommended.

If a participant experiences serious symptoms of Cushing's syndrome (e.g., weight gain, muscle loss) investigators may reduce the steroid dose but participants should be closely monitored for symptoms of secondary mineralocorticoid excess. It should be noted that weight gain and muscle loss are also associated with ADT.

If a participant allocated to receive abiraterone develops only biochemical failure, the responsible clinician may switch from abiraterone + prednisolone 5mg OD to abiraterone + dexamethasone 0.5mg OD.

### 6.2.3 Research Enzalutamide (Arm J)

Note: recruitment has closed to Arm J (SOC + enzalutamide + abiraterone).

Participants allocated to Arm J will receive enzalutamide in combination with abiraterone, in addition to SOC ADT. For information relating to treatment with abiraterone (and prednisolone), refer to Section 6.2.2.

#### 6.2.3.A Enzalutamide: Clinical particulars – posology and administration

Enzalutamide will be administered as a 160mg oral dose (four capsules), taken together at the same time every day, with or without food.

#### 6.2.3.B Enzalutamide: Clinical particulars - treatment duration

Enzalutamide will be taken for the same duration as the co-administered abiraterone, unless either abiraterone or enzalutamide is stopped for toxicity, in which case the other drug may continue.

Enzalutamide treatment duration is included in Table 9. See Section 7.1.3 for further information on the definition of progression.

#### 6.2.3.C Enzalutamide: Safety monitoring

##### Safety monitoring for participants receiving research enzalutamide alone.

Please see Table 11 for safety monitoring if enzalutamide given alongside abiraterone. In acute toxicity monitoring requirements may increase – see toxicity tables for more advice in this setting.

| ADVERSE EVENT OF INTEREST | MONITORING REQUIRED | FREQUENCY OF MONITORING WHILST ON RESEARCH ENZALUTAMIDE ALONE (IF ABIRATERONE PREVIOUSLY STOPPED FOR TOXICITY) IN THE TRIAL SETTING |                     |                                                                                                                                                                                                                                                                      |
|---------------------------|---------------------|-------------------------------------------------------------------------------------------------------------------------------------|---------------------|----------------------------------------------------------------------------------------------------------------------------------------------------------------------------------------------------------------------------------------------------------------------|
|                           |                     | WEEKS 0 – 12                                                                                                                        | WEEK 12 – 12 MONTHS | 12 MONTHS – END OF TREATMENT                                                                                                                                                                                                                                         |
| Hypertension              | Blood pressure*     | Every 2 weeks                                                                                                                       | Monthly             | Participants may have the frequency of monitoring reduced to every 3 months if judged appropriate by the investigator.<br><br>Continued monthly monitoring is required for participants if there are concerns related to research enzalutamide causing hypertension. |

\* Blood pressure may be monitored using documented self-monitoring or via the GP providing this is reviewed at each follow up.

#### 6.2.3.D Enzalutamide: Cautions and contra-indications

##### :: History of seizures

Caution should be used in administering enzalutamide to participants with a history of seizures or other predisposing factors including, but not limited to, underlying brain injury, stroke, primary brain tumours or brain metastases or alcoholism. In addition, the risk of seizure may be increased in participants receiving concomitant medications that may lower the seizure threshold. Enzalutamide should be permanently discontinued in participants who have a seizure while on treatment.

##### :: Hepatic impairment

A hepatic impairment study showed that the composite AUC of enzalutamide plus N-desmethyl enzalutamide after administration of a single dose of enzalutamide was similar in patients with

baseline mild, moderate or severe hepatic impairment (Child-Pugh Class A, B or C respectively) relative to patients with normal hepatic function, and no starting dose adjustment is needed (43).

#### :: Renal impairment

No dose adjustments are required in renal impairment; however, caution is advised if participants develop severe renal impairment as there is limited clinical data in this population.

#### 6.2.3.E Enzalutamide: Special warnings

##### :: Overdose

There is no antidote for enzalutamide. In the event of an overdose, stop treatment with enzalutamide and initiate general supportive measures taking into consideration the half life of 5.8 days. Participants may be at increased risk of seizures following an overdose.

#### 6.2.3.F Enzalutamide: Interactions (medications)

The full induction potential of enzalutamide may not occur until approximately 1 month after the start of treatment, when steady-state plasma concentrations of enzalutamide are reached, although some induction effects may be apparent earlier. Monitoring for drug interactions should continue for at least the first month of treatment and dose adjustments considered. Given the long half-life of enzalutamide (5.8 days), effects on enzymes may persist for one month or longer after stopping enzalutamide. A gradual dose reduction of the concomitant medicinal product may be necessary when stopping enzalutamide treatment. See for further details on specific drug interactions with enzalutamide.

Details on drug interactions are described in [Table 18](#) provides a summary on the main interactions.

#### :: Anti-androgens

Enzalutamide is potent androgen receptor antagonist and should **not** be given together with any other anti-androgens given the risk of toxicity. Cyproterone acetate should be discontinued 10 days and finasteride stopped 48 hours before commencing enzalutamide (+ abiraterone). Concomitant use anti-androgens including dutasteride, bicalutamide, flutamide and tamoxifen are **not recommended**.

Participants receiving or planned for dual androgen blockade (DAB) at randomisation should not continue anti-androgens if randomised to receiving enzalutamide (+abiraterone).

**Table 18: Drugs which may interact with enzalutamide**

| <b>DRUGS WHICH MAY INCREASE ENZALUTAMIDE LEVELS</b>            |                     |                                                                  |                                                                                                                                                                                                                                                                                                                                                                                              |
|----------------------------------------------------------------|---------------------|------------------------------------------------------------------|----------------------------------------------------------------------------------------------------------------------------------------------------------------------------------------------------------------------------------------------------------------------------------------------------------------------------------------------------------------------------------------------|
| <b>Substrate</b>                                               | <b>Clinical Use</b> | <b>Drug</b>                                                      | <b>Recommendation</b>                                                                                                                                                                                                                                                                                                                                                                        |
| CYP2C8 inhibitors                                              | Lipid-lowering      | Gemfibrozil                                                      | Avoid, if no alternatives, reduce enzalutamide dose to 80mg                                                                                                                                                                                                                                                                                                                                  |
| <b>DRUGS WHICH MAY DECREASE ENZALUTAMIDE LEVELS</b>            |                     |                                                                  |                                                                                                                                                                                                                                                                                                                                                                                              |
| <b>Substrate</b>                                               | <b>Clinical Use</b> | <b>Drug</b>                                                      | <b>Recommendation</b>                                                                                                                                                                                                                                                                                                                                                                        |
| CYP2C8 inducers                                                | Anti-tuberculosis   | Rifampicin<br>Rifabutin                                          | Avoid if possible. If the therapeutic effect of these medications is of large importance to the patient, and dose adjustments are not easily performed based on monitoring of efficacy or plasma concentrations of these medicinal products, use with caution, due to risk of decreased exposure to enzalutamide.                                                                            |
| CYP3A4 inducers                                                | Anti-epileptics     | Phenytoin<br>Carbamazepine<br>Phenobarbital                      |                                                                                                                                                                                                                                                                                                                                                                                              |
|                                                                | Anti-depressant     | St John's wort                                                   |                                                                                                                                                                                                                                                                                                                                                                                              |
|                                                                | Anti-retrovirals    | Atazanavir<br>Saquinavir<br>Ritonavir<br>Indinavir<br>Nelfonavir | Avoid if possible. If the therapeutic effect of these medications is of large importance to the patient, and dose adjustments are not easily performed based on monitoring of efficacy or plasma concentrations of these medicinal products, use with caution. This is due to risk of decreased exposure to enzalutamide and increased risk of toxicity from the anti-retroviral medication. |
| <b>ENZALUTAMIDE MAY REDUCE DRUG LEVELS</b>                     |                     |                                                                  |                                                                                                                                                                                                                                                                                                                                                                                              |
| <b>Substrate</b>                                               | <b>Clinical Use</b> | <b>Drug</b>                                                      | <b>Recommendation</b>                                                                                                                                                                                                                                                                                                                                                                        |
| CYP2C19                                                        | Gastric protection  | Omeprazole                                                       | Omeprazole AUC reduced by 70%<br>Consider increasing dose of omeprazole for same therapeutic effect                                                                                                                                                                                                                                                                                          |
| CYP3A4                                                         | Analgesia           | Fentanyl*<br>Alfentanil*<br>Tramadol                             | Consider alternatives as clinical effect may be reduced, if no therapeutic alternative monitor closely                                                                                                                                                                                                                                                                                       |
|                                                                | Immunosuppressants  | Sirolimus*<br>Tacrolimus*<br>Cyclosporine*                       |                                                                                                                                                                                                                                                                                                                                                                                              |
|                                                                | Anti-migraine       | Ergotamine                                                       |                                                                                                                                                                                                                                                                                                                                                                                              |
|                                                                | Cardiac             | Nifedipine<br>Ivabradine                                         |                                                                                                                                                                                                                                                                                                                                                                                              |
| CYP2C9                                                         | Anti-epileptics     | Phenytoin*                                                       | Contra-indicated                                                                                                                                                                                                                                                                                                                                                                             |
|                                                                | Anti-coagulants     | Warfarin*                                                        | Warfarin AUC reduced by 56%<br>Consider switching to low molecular heparin, increase INR monitoring if this is not possible                                                                                                                                                                                                                                                                  |
| <b>DRUGS WHICH MAY ACCUMULATE WHEN GIVEN WITH ENZALUTAMIDE</b> |                     |                                                                  |                                                                                                                                                                                                                                                                                                                                                                                              |
| <b>Substrate</b>                                               | <b>Clinical Use</b> | <b>Drug</b>                                                      | <b>Recommendation</b>                                                                                                                                                                                                                                                                                                                                                                        |
| p-gp                                                           |                     | Colchicine*<br>Dabigatran*<br>Digoxin*                           | Consider alternatives, if no therapeutic alternative monitor closely                                                                                                                                                                                                                                                                                                                         |

\*narrow therapeutic index

### 6.2.3.G Enzalutamide: Undesirable effects

Please refer to section 6.2.2.G for management of hypokalaemia, deranged LFTs, hypertension, fluid retention and diarrhoea that occurs whilst on enzalutamide in combination with abiraterone.

The safety monitoring and toxicity management plan described below takes into account AEs based on the reported clinical safety data of abiraterone and enzalutamide given separately. There are limited reported data on the safety and toxicity of the combination of enzalutamide and abiraterone; however, the recommendations summarised here have been updated in light of the experience gained in STAMPEDE as recommended by the STAMPEDE TMG.

Additional toxicity to be aware of relevant to enzalutamide alone include the following:

**Table 19: Management of seizure whilst on enzalutamide treatment**

| TOXICITY EVENT      | ACTION                                                                                                                                                                                                                       |
|---------------------|------------------------------------------------------------------------------------------------------------------------------------------------------------------------------------------------------------------------------|
| Seizure (any Grade) | If any participant suffers a seizure whilst on treatment, enzalutamide should be permanently discontinued immediately. Abiraterone and prednisolone can be continued providing there are no abiraterone-specific toxicities. |

**Table 20: Management of arthralgia & muscle pain (associated with enzalutamide)**

| TOXICITY EVENT | ACTION                                     |
|----------------|--------------------------------------------|
| Grade 1-2      | Symptomatic management                     |
| Grade 3-4      | Reduce dose of enzalutamide to 120 mg /day |

**Table 21: Management of fatigue (associated with enzalutamide)**

| TOXICITY EVENT | ACTION                                                                                                                                                                                                                          |
|----------------|---------------------------------------------------------------------------------------------------------------------------------------------------------------------------------------------------------------------------------|
| Grade 1-2      | Consider a dose reduction to 120 mg/day                                                                                                                                                                                         |
| Grade 3        | <b>Pause enzalutamide</b> for 1 week or until the toxicity grade improves to Grade 2 or lower severity.<br>Re-start at a reduced dose (120mg/day or 80mg/day), dose chosen to restart is at the treating clinicians discretion. |

## 6.2.4 Research Metformin (Arm K)

Note: General recruitment has closed to Arm K. From protocol 21 only participants to be involved in the metabolic sub-study can be randomised to Arm K.

Participants allocated to Arm K will receive metformin, in addition to SOC treatments. All potential SOC systemic treatment options are suitable for combination with metformin.

### 6.2.4.A Metformin Clinical particulars – posology and administration

For all participants allocated to Arm K, metformin should start as soon as possible after randomisation and ideally within a maximum of 12 weeks.

Metformin will be given as a daily dose in addition to SOC treatment. The target dose is **850mg Std BID**.

The starting dose for metformin is 850mg Std OD. If tolerated, this should be increased to the target dose after 4-6 weeks i.e. at the first follow-up visit.



Metformin should be taken around the same time each day and treatment tolerance is best if taken with or after food. For twice daily dosing, the minimum time between doses should be 8 hours; doses should not be taken closer together if forgotten or missed.

Providing participants have a sufficient supply of STAMPEDE-labelled IMP metformin tablets, a telephone consultation may be sufficient to assess tolerance and give advice regarding dose modification in order to limit hospital visits. This interaction **must be documented** in the medical records.

**:: Metformin dose modifications**

If metformin target dose of 850mg Std BID is not well tolerated, the dose reductions listed in **Table 22** could be implemented.

Note: Sustained release formulations (SR) can sometimes be better tolerated with less GI side-effects than the standard or immediate release formulations (Std). Both drugs provide similar exposure at a given daily dose.

**Table 22: Management of metformin related GI-toxicity**

| <b>GRADE 1 OR 2 TOXICITY:</b><br><b>ASSUMES STARTING ON 850MG STD BD (1,700MG TOTAL DAILY DOSE) DOSE.</b><br><b>IF TOXICITY OCCURS ON LOWER DOSE – DROP TO THE NEXT DOSE LEVEL DOWN</b> |                                                                                                                                                                        |                                                                                                      |                                                                                                                                                                                                                                |                                                                               |
|-----------------------------------------------------------------------------------------------------------------------------------------------------------------------------------------|------------------------------------------------------------------------------------------------------------------------------------------------------------------------|------------------------------------------------------------------------------------------------------|--------------------------------------------------------------------------------------------------------------------------------------------------------------------------------------------------------------------------------|-------------------------------------------------------------------------------|
| <b>IF ONGOING TOXICITY</b> 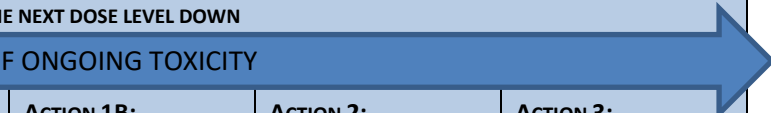                                                                          |                                                                                                                                                                        |                                                                                                      |                                                                                                                                                                                                                                |                                                                               |
| <b>ACTION 1:</b>                                                                                                                                                                        | <b>ACTION 1A:<br/>DOSE REDUCTION LEVEL<br/>1<br/>(OPTIONS)</b>                                                                                                         | <b>ACTION 1B:<br/>DOSE ON RESTART<br/>AFTER PAUSE<br/>(OPTIONS)</b>                                  | <b>ACTION 2:<br/>DOSE REDUCTION LEVEL<br/>2<br/>(OPTIONS)</b>                                                                                                                                                                  | <b>ACTION 3:<br/>STOP TREATMENT</b>                                           |
| Ensure metformin is taken with or after food and consider dose reduction<br><br><b>OR</b><br>Ensure metformin is taken with or after food and consider 1-2 week treatment pause.        | a) 750mg SR BID (1500mg total daily dose)<br><br><b>OR</b><br>b) 500mg SR BID (1000mg total daily dose)<br><br><b>OR</b><br>c) 500mg Std BID (1000mg total daily dose) | a) 850mg Std OD (850mg total daily dose)<br><br><b>OR</b><br>b) 500mg SR OD (500mg total daily dose) | a) 850mg Std OD (850mg total daily dose)<br><br><b>OR</b><br>b) 750mg SR OD (750mg total daily dose)<br><br><b>OR</b><br>c) 500mg SR OD (500mg total daily dose)<br><br><b>OR</b><br>d) 500mg Std OD (500 mg total daily dose) | If toxicity occurs after two dose reductions, we recommend stopping treatment |
|                                                                                                                                                                                         | <i>Re-attempt a dose escalation after 1-2 month aiming to continue at the maximum tolerated dose</i>                                                                   |                                                                                                      |                                                                                                                                                                                                                                |                                                                               |

### :: Treatment breaks

It is anticipated that metformin treatment will be paused for approximately 72 hours around the time of contrast-enhanced CT scans (see [Table 24](#)) and may need to be paused during episodes of inter-current illness.

- If metformin is paused for 6 days or less this information does not need to be recorded and no additional action is needed.
- Treatment pauses of  $\geq 7$  days must be recorded by updating the Metformin Treatment Log CRF.
- If metformin treatment is paused for more than 2 weeks, investigators may consider re-starting at 850mg Std once daily for the first 4 weeks before escalating to full dose providing tolerance is acceptable.
- If treatment is paused for  $>3$  months or  $>50\%$  of doses are missed for any reason, it is at the discretion of site investigators as to whether it is appropriate to restart trial treatment with metformin. Please ensure treatment pauses are recorded and feel free to contact the CTU for any advice if required.

### 6.2.4.B Metformin: Clinical particulars – treatment duration

Metformin treatment duration is included in [Table 9](#).

### 6.2.4.C Metformin: Safety monitoring

Routine safety monitoring frequency is described in [Table 23](#).

**Table 23: Renal function monitoring required whilst on treatment with metformin**

| RENAL FUNCTION:                                                                                                                                                                                              | FREQUENCY OF MONITORING:                                                              |
|--------------------------------------------------------------------------------------------------------------------------------------------------------------------------------------------------------------|---------------------------------------------------------------------------------------|
| <ul style="list-style-type: none"><li>• Stable renal function <b>AND</b></li><li>• <math>eGFR \geq 45 \text{ ml/min/1.73m}^2</math></li></ul>                                                                | 6 monthly                                                                             |
| <ul style="list-style-type: none"><li>• Risk of deteriorating renal function <b>AND/OR</b></li><li>• <math>eGFR</math> falls to <math>&gt;30</math> and <math>&lt;45 \text{ ml/min/1.73m}^2</math></li></ul> | At least 3 monthly (44)<br><i>NB: Max dose is 1000mg per 24 hours in this setting</i> |
| <ul style="list-style-type: none"><li>• <math>eGFR</math> falls to <math>\leq 30 \text{ ml/min/1.73m}^2</math></li></ul>                                                                                     | Metformin should be paused*                                                           |

\*Should the Site Investigator decide the decline in renal function to  $\leq 30 \text{ ml/min/1.73m}^2$  is irreversible then metformin must be permanently stopped

### 6.2.4.D Metformin: Cautions and contraindications

#### :: Renal impairment

Metformin is not nephrotoxic, but is exclusively excreted by the kidneys. Therefore treatment should only be started in participants with stable renal function. Metformin should be only started when the  $GFR \geq 45 \text{ ml/min/1.73m}^2$ , as per the metformin comparison-specific eligibility criteria in section [4.6.1](#).

Additional renal monitoring is required in any participant at risk of deteriorating renal function. In line with published prescribing recommendations, if the  $GFR$  falls to between  $30\text{-}45 \text{ ml/min/1.73m}^2$  a **dose reduction** is required to ensure the maximum 24hr dose is 1000mg or less and monitoring of renal function is required at least 3 monthly (44).

Metformin should be **permanently stopped** if the  $GFR$  falls to  $\leq 30 \text{ ml/min/1.73m}^2$  and is irreversible.

See [Table 24](#) for situations when metformin treatment should be paused due to the risk of deteriorating renal function.

**Table 24: Situations when metformin treatment should be paused due to risk of deteriorating renal function**

| SITUATIONS                                                             | RISK FACTOR                                                                                                                                                                               |
|------------------------------------------------------------------------|-------------------------------------------------------------------------------------------------------------------------------------------------------------------------------------------|
| Iodinated contrast agents                                              | Metformin should be paused for 24 hours prior to receiving contrast and re-started 48 hours post-administration(45).                                                                      |
| Anaesthesia (peridural; spinal or general)                             | Pause metformin 48 hours prior to procedure and re-start no earlier than 48 hours following procedure, providing oral intake re-established and renal function is stable and at baseline. |
| Surgery                                                                | Pause metformin 48 hours prior to procedure and re-start no earlier than 48 hours following procedure, providing oral intake re-established and renal function is stable and at baseline. |
| Dehydration<br>e.g. nausea, vomiting or diarrhoea                      | Pause metformin and re-start only when oral intake is re-established and renal function is stable and at baseline.                                                                        |
| Obstructive uropathy<br>e.g. urinary retention or ureteric obstruction | Pause metformin and re-start only when renal function confirmed to be stable and at baseline.                                                                                             |

#### 6.2.4.E Metformin: Special warnings

##### :: Metformin overdose

Hypoglycaemia has not been reported with even significant metformin overdoses although lactic acidosis has occurred in such circumstances. Participants should be urgently assessed in the event of an overdose and hospital admission considered. The management of metformin overdoses should be as per standard clinical care by the local team. The most effective way to remove lactate and metformin is haemodialysis.

#### 6.2.4.F Metformin: Interactions (medications)

Caution is needed when initiating potential nephrotoxic drugs as metformin is renally excreted and therefore may accumulate if renal function deteriorates. Please refer to [Table 25](#) for more information on drugs which may require additional monitoring of renal function, at the discretion of the treating clinician.

Metformin does **not** interact with any of the other treatments for prostate cancer and **should be continued** during all further treatments given for disease progression, **provided clinicians feel it remains in the participants best interests**, as per [Table 9](#).

As metformin is being given as an IMP in the context of a clinical trial, continued use will not be permitted if participants participate in other interventional clinical trials for prostate cancer (i.e. CRPC setting).

**Table 25: Drugs which may require additional monitoring of renal function**

| Clinical use                                 | Drug                                                                                     | Recommendation                                                                                                         |
|----------------------------------------------|------------------------------------------------------------------------------------------|------------------------------------------------------------------------------------------------------------------------|
| Anti-hypertensives and other cardiac disease | ACE inhibitors/angiotensin II receptor blockers<br>e.g. ramipril, lisinopril, irbesartan | Increased frequency of renal function monitoring until confirmed to be stable                                          |
|                                              | Diuretics<br>e.g. furosemide, bumetanide                                                 |                                                                                                                        |
| Antibiotics                                  | Aminoglycoside antibiotics<br>e.g. gentamicin or amikacin                                | Pause metformin during treatment<br>Re-start once treatment complete                                                   |
| Analgesia                                    | NSAIDs<br>e.g. Ibuprofen, diclofenac, naproxen                                           | Avoid if possible<br>If used increased frequency of renal function monitoring is required until confirmed to be stable |

#### 6.2.4.G Metformin: Undesirable effects

##### :: Gastrointestinal disturbance

Gastrointestinal disturbances are very common with metformin and include nausea, vomiting, diarrhoea, abdominal pain and loss of appetite. These are most common when first starting treatment (occur in >1/10 individuals).

If toxicities occur, a dose reduction and/or a switch to a sustained release (SR) preparation, if available, is recommended (see [Table 22](#)).

Other possible metformin-related toxicities included taste disturbance, skin reactions and B12 deficiency resulting in megaloblastic anaemia. If a participant becomes anaemic whilst taking metformin, investigators should consider measuring haematinics, including vitamin B12, and replace if deficient.

##### :: Lactic acidosis

Lactic acidosis is a very rare (3/100,000 patient years), but serious metabolic consequence. Reported cases have occurred primarily in diabetic patients with significant renal impairment who are also dehydrated. It is unclear whether this is due to the underlying diabetes or metformin. This is supported by a meta-analysis demonstrating similar rates of lactic acidosis in people with diabetes taking metformin compared with diabetic participants not taking metformin (46). This evidence suggests this side effect may be a complication of diabetes and may not be associated with metformin treatment.

The risk factors for lactic acidosis are: renal impairment, prolonged fasting or malnutrition, excessive alcohol intake, hepatic insufficiency or any condition associated with hypoxia e.g. cardiac or respiratory failure or circulatory shock due to any cause.

The risk of lactic acidosis should be considered in the event of non-specific symptoms such as muscle cramps, abdominal pain and/or severe weakness or lethargy. Any participant with a suspected metabolic acidosis requires **immediate discontinuation of metformin** and evaluation. Lactic acidosis is characterised by metabolic acidosis (decreased blood pH, high lactate above 5mmol/L and an increased anion gap and lactate/pyruvate ratio). The most effective way to remove lactate and metformin is haemodialysis.

## 6.2.5 Research Transdermal Oestradiol (Arm L)

### :: Timeframe for commencing treatment

For all participants allocated to transdermal oestradiol, treatment should start as soon as possible after randomisation (and ideally within 1 week after randomisation). It is not necessary to wait for completion of the 4-week (or 1-month) duration of the LHRHa injection if this was previously given prior to randomisation. For those prescribed bicalutamide or flutamide prior to randomisation, this treatment should be discontinued before treatment with transdermal oestradiol can commence (no washout period is needed).

### :: Transdermal oestradiol with SOC treatments

If SOC docetaxel has not been started before randomisation, it is recommended that it is started, for suitable participants, once established on transdermal oestradiol for around 4 weeks, when most participants are likely to have completed the induction period).

From protocol v21.0 onwards, participants randomised to the transdermal oestradiol comparison are also eligible to receive SOC abiraterone, enzalutamide or apalutamide in the upfront setting, as an alternative to docetaxel (see [Section 6.1.4](#)). However, the use of enzalutamide, abiraterone or apalutamide *prior to starting treatment* with transdermal oestradiol patches is not authorised (see [Section 4.3.3](#)).

Participants randomised to receive transdermal oestradiol may also receive SOC radiotherapy (see [Section 6.1.2](#)) as clinically appropriate, as has been done in the PATCH trial.

### 6.2.5.A Transdermal oestradiol: Clinical particulars – posology and administration

Transdermal oestradiol is delivered either as Progynova TS 100 mcg/24 hours or since protocol v21.0 as Femseven 100 mcg/24hours transcutaneous oestradiol patches. Administration should proceed according to the following dose regimen which has been shown within the PATCH trial to be sufficient for achieving castrate levels of testosterone.

The changing of patch brand should be avoided unless absolutely necessary and should only be done following discussion with the CTU trial team.

Other type of patches should only be used in exceptional circumstances and after discussion with the CTU team, as we currently do not have sufficient pharmacokinetic and clinical data to recommend the use of other types of patches.

### 6.2.5.B :: Induction regimen

**Four** transdermal oestradiol patches to be changed twice weekly (e.g. Monday and Thursday) for four weeks. A confirmatory testosterone and oestradiol sample should be taken at 4 weeks with the sample drawn the **day before** the patches are changed.

### 6.2.5.C :: Maintenance regimen

If the participant has achieved a testosterone value of  $\leq 1.7$ nmol/L and has an oestradiol level  $>300$ pmol/L at 4 weeks, then treatment may be changed to a **maintenance regimen of three** patches changed twice weekly. However, current observations from the PATCH trial suggest castrate levels of testosterone are typically achieved with a plasma oestradiol level  $\geq 500$ pmol/L, and sites can opt to wait until oestradiol reaches this level before switching if they prefer.

If a participant's testosterone is  $>1.7$ nmol/L or the oestradiol level is  $<300$ pmol/L at four weeks then they should remain on the induction regimen for another 4 week period, with monitoring of testosterone and oestradiol samples taken at around the week 8 time point, the day before patches

are changed. Once the participant achieves a castrate level of testosterone  $\leq 1.7\text{nmol/L}$  and an oestradiol level of  $\geq 300\text{pmol/L}$ , they can be switched to the maintenance regimen.

It is expected that participants remain on the prescribed dose, and any potential dose modifications other than those indicated in [Section 6.2.5](#) should be first discussed with the CTU team.

#### **6.2.5.D :: Administration guidelines**

Consecutive patches should be applied to different sites. It is recommended that patches are placed on dry, intact and hairless skin and on areas where little wrinkling occurs, at the following sites only:

- Shoulder girdle
- Upper body
- Hip
- Abdomen
- Back
- Upper arms
- Buttocks

Patches should not be placed on or near the breast area, or on areas of the body where there are large amounts of subcutaneous fat, particularly around the abdomen, as this could affect absorption. Please note that these recommendations are mainly based on studies in women using the patches.

To apply the patch, remove the protective liner and press on to the skin immediately, holding for at least 30 seconds to ensure proper adhesion. If necessary, tape can be used to fix the patch in place. If applied correctly, the participant can bath or shower as normal; however, the patches might come off in very hot water or in a sauna.

Prior treatment start, participants should be provided with the STAMPEDE (Arm L) Study Hormone Patch Application Information for Participants to promote good treatment compliance.

#### **6.2.5.E Transdermal oestradiol: Monitoring Hormone Levels**

During enrolment of the first cohort of participants starting treatment with a combination of abiraterone, enzalutamide or apalutamide alongside transdermal oestradiol, the CTU will monitor the changing testosterone, oestradiol and PSA levels in real time. This is to ensure that the combination of treatment does not impact the efficacy of the transdermal oestradiol patches.

**Therefore please send the updated hormone results log to the CTU urgently following any blood test in the first 3 months to facilitate this safety analysis.**

Oestradiol and testosterone levels should continue to be monitored throughout follow-up, while the participant remains on transdermal oestradiol treatment, to assess for evidence of compliance and to also ensure the participant is on the appropriate dose. [Table 2](#) describes when these values are required, noting also that the samples can be taken at the same time as scheduled PSA measurements.

Scenarios when additional oestradiol and testosterone monitoring is required are given below.

#### **:: Oestradiol $<300\text{pmol/L}$ or $>2000\text{pmol/L}$ or testosterone $>1.7\text{nmol/L}$ while on the maintenance regime**

A repeat blood test should be carried out within 4 weeks if, at any time, the participant's oestradiol level is found to be  $<300\text{pmol/L}$  or  $>2000\text{pmol/L}$  or the testosterone level is  $>1.7\text{nmol/L}$  while on the maintenance regime, with particular attention paid to the day that the patches are changed

compared to when the blood sample is drawn (should be the day before changing patches). If the participant continues to have out of range oestradiol levels, and/or persistent testosterone >1.7nmol/L, then the CTU team should be contacted for advice.

**:: Change of maintenance patch dose**

If the maintenance patch dose is changed at any time (for example, reducing from 3 to 2 patches changed twice weekly), then additional oestradiol and testosterone tests are required around 4 weeks after dose modification.

**:: Change of patch brand**

The changing of patch brand should be avoided unless absolutely necessary (see [Section 6.2.5.A](#)) but if advised by the CTU trial team, then additional oestradiol, testosterone and PSA tests are required following the change (see [Table 26](#)). It is important that participants are then monitored in real-time during this initial period, with the CTU team to be contacted if the hormone results are out of range as it may be necessary to modify the dose regimen.

**Table 26: Additional assessments required following change of maintenance patch dose or brand**

| ASSESSMENTS REQUIRED               | WEEKS FROM DOSE MODIFICATION OR CHANGE IN PATCH BRAND* |                         |                         |                          |
|------------------------------------|--------------------------------------------------------|-------------------------|-------------------------|--------------------------|
|                                    | WEEK 0<br>(PRIOR TO CHANGE)                            | WEEK 4<br>(POST CHANGE) | WEEK 8<br>(POST CHANGE) | WEEK 12<br>(POST CHANGE) |
|                                    | <b>Change of maintenance dose</b>                      |                         |                         |                          |
| OESTRADIOL<br>TESTOSTERONE<br>PSA  | X                                                      | X                       |                         |                          |
|                                    | <b>Change of patch brand</b>                           |                         |                         |                          |
| OESTRADIOL,<br>TESTOSTERONE<br>PSA | X                                                      | X                       | X                       | X**                      |

\* These additional tests are timed from the day of dose modification or day of starting new patch brand. However, if the post-change tests coincide within 1 week of scheduled tests (see [Table 2](#)), it is not necessary to repeat the tests.

\*\* Dependent on prior results, 12 week test may be requested by CTU trial team

**6.2.5.F Transdermal oestradiol: Cautions and contraindications**

Tamoxifen should not be prescribed for participants receiving transdermal oestradiol.

**6.2.5.G Transdermal oestradiol: Special warnings**

If a participant has a cardiovascular event (see [Section 7.1.4.A](#)), discontinuation of treatment with transdermal oestradiol may be considered at the discretion of the treating clinician.

**6.2.5.H Transdermal oestradiol: Interactions (medications)**

The metabolism of oestrogens may be increased by concomitant use of substances known to induce drug metabolising enzymes, specifically CYP450 enzymes. However, with transdermal administration, the first-pass effect in the liver is avoided and, thus, transdermally applied oestrogens might be less affected than oral hormones by enzyme inducers. Oestradiol levels are already monitored as part of trial follow-up while participants are on transdermal oestradiol, therefore no additional monitoring is required when combining enzyme inducers with transdermal oestradiol.

#### 6.2.5.1 Transdermal oestradiol: Undesirable effects

Dermatitis can be a common side-effect of using the patches, especially in the induction period, which can usually be controlled by alternating the site of patch application. Participants should be advised that if patches become dislodged they should not put on extra patches, but apply their next set of patches when they are next due to be applied.

Prophylactic irradiation of the breast area, shown to reduce risk of gynaecomastia is permitted: a single fraction of 8Gy is recommended preferably before treatment with transdermal oestradiol (47).

### 6.3 CONCOMITANT TREATMENTS

All concomitant medications should be continued throughout the trial unless the responsible clinician decides otherwise, or there is a potential interaction with the trial treatment, in which case it is the responsibility of the responsible clinician to take the advised action. Please refer to each individual trial treatment section to see a list of drugs which may potentially interact.

#### 6.3.1.A Data collection on concomitant treatments for participants in arms A, G, H, J, K, L

Long-term (>6 months) use of the following concomitant medications of classes of interest is collected:

- Statins
- Metformin (except as Arm K trial treatment)
- Aspirin
- Bisphosphonates or denosumab

This information is of interest both in terms of baseline use and ongoing use through the trial; as such it should be recorded on the Randomisation CRF and will be collected at each follow-up assessment (see [Table 1](#) and [Table 2](#)).

### 6.4 TRIAL PRODUCTS

Details of the procedures for obtaining the drugs within the trial, dispensing and disposal of unused drug are given in [STAMPEDE Pharmacy Information Sheet](#). Arrangements for free or discounted drugs are given in the Finance section ([Section 15](#)).

### 6.5 TREATMENT DATA COLLECTION

Data will be recorded on case report forms (CRFs); the original should be sent to CTU for data entry and a copy kept at the local site. Current versions of all CRFs can be found on the trial website (<http://www.stampededtrial.org/>) and sites will be notified of any changes throughout the course of the trial. The type of data to be recorded is detailed in the Assessments and Procedures section ([Section 7](#)).

### 6.6 MEASURES OF COMPLIANCE/ADHERENCE

Date of treatment, dose, delays and reasons for delays or dose modifications of all trial treatments will be recorded. The estimated number of abiraterone tablets, enzalutamide capsules or metformin tablets taken in a given time period will also be recorded as well as any dose reductions. See [Table 28](#) for a description of the treatment logs.

Oestradiol levels will be collected for participants in the transdermal oestradiol arm and used to assess compliance to treatment (see [Section 6.2.5.C](#)).



Evidence of compliance with safety monitoring is required for participants on research abiraterone and research enzalutamide e.g. potassium and LFTs, or metformin treatment e.g. renal function, as described in sections **6.2.2.C**, **6.2.3.C**, and **6.2.4.C**. Site investigators should document in the participant's medical records the date of the blood test or review of blood pressure measurements and confirmation that the results were known to be within acceptable limits and if not, the toxicity should be graded according to CTCAE V4.0 and the action described. This should be available at on-site monitoring visits and used to verify the information provided on the follow-up CRF and treatment logs.

Note, safety monitoring for SOC abiraterone, enzalutamide and apalutamide is as per local practice and compliance data is not required by the trial.

## 7 ASSESSMENTS AND PROCEDURES

### 7.1 SCHEDULE FOR ASSESSMENTS

#### 7.1.1 Follow-up Schedules

An individualised form with a follow-up schedule will be provided for each randomised participant. Which follow-up schedule applies depends on which comparison the participant was randomised to as summarised in Table 27.

**Table 27: Summary of follow-up schedules by participant group**

| COMPARISON                     | PARTICIPANT DETAILS                                                               | FOLLOW-UP SCHEDULE                       |
|--------------------------------|-----------------------------------------------------------------------------------|------------------------------------------|
| "Original"                     | Arms B, C, D, E, F and Arm A recruited between trial start (2005) and 15-Nov-2011 | Active follow-up discontinued in Q3 2018 |
| "Abiraterone"                  | Arms A and G randomised between 15-Nov-2011 and 17-Jan-2014                       | See <a href="#">Table 1</a>              |
| "Abiraterone and enzalutamide" | Arms A and J randomised between 29-Jul-2014 and 31-March 2016                     | See <a href="#">Table 1</a>              |
| "M1 RT"                        | Arms A and H randomised between 22-Jan-2013 and 02-Sep-2016                       | See <a href="#">Table 1</a>              |
| "Metformin"                    | Arms A and K randomised since 05-Sep-2016                                         | See <a href="#">Table 2</a>              |
| "Transdermal oestradiol"       | Arms A and L randomised since 20-Jun-2017                                         | See <a href="#">Table 2</a>              |

#### 7.1.2 PSA, Testosterone And Oestradiol Measurements

All participants should have PSA measured prior to starting ADT and at every subsequent trial follow-up visit, regardless of allocated treatment arm. For participants who do not have a scheduled hospital visit, it is acceptable for arrangements to be made for blood samples to be drawn at their GP surgery.

For arm L participants, oestradiol and testosterone levels should continue to be monitored while the participant remains on transdermal oestradiol treatment. The first follow-up visit post-randomisation can be scheduled at 4 instead of 6 weeks to coincide with the 4-week hormone tests (see [Section 6.2.5](#)). These samples could be taken at the same time as the PSA tests, unless additional tests are required as detailed in [Section 6.2.5](#). Blood samples should be taken the day before the oestradiol patches are changed, to allow consistent measurements of testosterone and oestradiol with respect to the pharmacokinetic profile of the patches.

#### 7.1.3 Assessment Of Treatment Failure (Definition Of Progression)

All participants should have baseline radiological examinations as detailed in [Section 4.2.1](#). Participants are not routinely assessed for response. However, in order that objective progression can be assessed, it is recommended to have imaging taken at time of best response as judged by the treating clinician. The frequency of imaging is at the discretion of the treating clinician.

The following outcomes should be reported on the Progression log:

- Biochemical failure

- Local progression
- Lymph node progression
- Progression or development of new distant metastases, defined as lymph nodes outside the pelvis, bone or organ involvement
- Skeletal-related events confirmed as progression (see below)

### 7.1.3.A Biochemical Failure

For the purposes of the STAMPEDE trial, a unique threshold PSA value for biochemical failure is calculated, referred to as the **PSA progression value**.

This value is derived for each participant based on their **PSA nadir**, defined as the lowest PSA value reported between *randomisation* and 24 weeks on trial. Please refer to the PSA progression value calculator on the STAMPEDE website.

The exact method for deriving the progression value for a participant depends on the value of their PSA nadir, and how this compares to their pre-treatment PSA value (i.e. the extent of the fall in PSA from the starting point).

The PSA progression values are shown within **Figure 3**, they are calculated in one of three ways:

- If the lowest recorded PSA value in the 24 weeks following randomisation is more than 4ng/ml and more than 50% of the pre-treatment PSA level then the participant fulfils the criteria for immediate treatment failure.
- For participants whose PSA nadir in the 24 weeks following randomisation is less than or equal to 50% of the pre-treatment PSA level but remains above 4ng/ml, biochemical failure will be defined as a rise of 50% above the nadir level.
- For participants whose PSA nadir is less than or equal to 4ng/ml, biochemical failure is defined as at least a 50% rise above the nadir value that is also above 4ng/ml.

**Figure 3 PSA progression example scenarios**

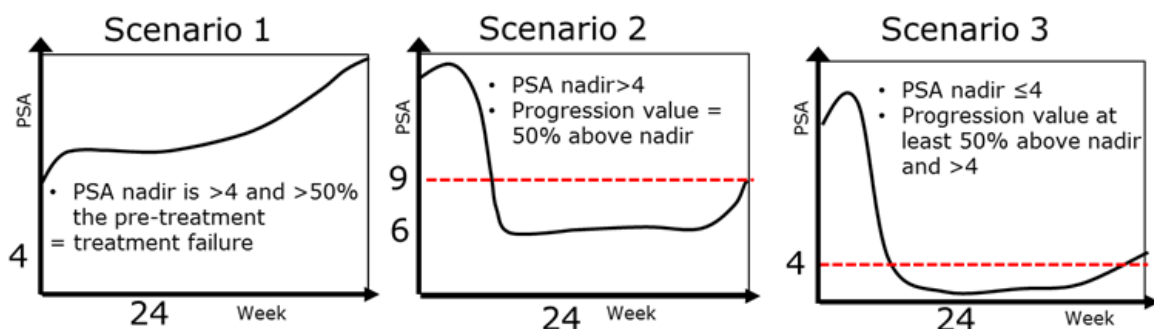

**Confirming biochemical failure:** the timing of assessments needs to be considered because spurious rises in PSA can occur e.g. following procedures involving the urinary tract. For this reason, any isolated rise in PSA should be confirmed before reporting biochemical failure.

In the case that the raised PSA value reaches the progression value, a confirmatory PSA test should be performed between one week and 3 months later. Biochemical failure is confirmed if the second value is around the same level or higher i.e. the trend is confirmed. The date of PSA progression

should be provided on the Progression Log as the date of the **first** raised PSA that fulfilled the trial definition of progression. Only the first instance of biochemical failure needs to be reported.

A confirmatory PSA is not required if there are other signs of progression e.g. progression of cancer related symptoms (clinical progression) or new radiological progression.

Second-line treatment commenced specifically for biochemical failure should not start until the trial definition for biochemical failure has been met. However, if second-line treatment does start before the trial definition is met then report the closest PSA value prior to the treatment start date as the progression value. This is not required if second-line treatment is being started for other signs of progression e.g. clinical or radiological.

**Testosterone levels:** are only required when reporting biochemical progression whilst receiving hormone treatment to confirm the diagnosis of castrate-resistant prostate cancer. Testosterone levels are not required when reporting biochemical progression in participants not receiving hormone therapy e.g. participants who presented with non-metastatic disease have relapsed following completion of treatment.

#### **7.1.3.B Local, Lymph Node And Metastatic Failure**

For each of local, lymph node and distant metastases progression, **both of** the following should be reported:

- Date of first clinical/symptomatic progression
- Date of first objective/radiological progression

#### **7.1.3.C Skeletal-related Events**

- Pathological Fracture
- Spinal cord compression
- Requirement for RT to bone (e.g. for pain or impending fracture)
- Requirement for surgery (e.g. for prevention or management of fracture)

SREs are a secondary outcome measure and a disease event of interest. SREs may represent disease progression but can also occur due to treatment-related effects e.g. osteoporotic fracture due to treatment-related bone-mineral density loss. All SREs should be recorded on the Follow-up form.

All SREs should be investigated further to establish whether or not the participant has progressed and, if confirmed as progression, a Progression Log should be completed to record this along with an Additional Treatment Log to give details of any treatment received (e.g. radiotherapy or surgical). The summary of timing of Case Report Forms can be viewed in [Table 28](#) and [Table 29](#).

#### **7.1.3.D Objective/Radiological progression**

Investigator determined radiological progression should be reported. For specific comparisons it may be necessary to centrally review baseline and progression scans e.g. CT scans and bone scans. Requests for scans will be made if and when these are required for a proportion of relevant participants and processes put in place for electronic transfer and site reimbursement.

### **7.1.4 Additional Metabolic And Cardiovascular Outcomes**

A number of metabolic and cardiovascular (CVS) outcomes are being assessed in the “metformin comparison” and “transdermal oestradiol comparison” as outlined below. From protocol v17.0 onwards, a metabolic profile (lipids, glucose and HbA1c) will be measured for all participants randomised from 05-Sep-2016 onwards to capture data on metabolic and cardiovascular outcomes for both comparisons. This is collected to improve the understanding of the metabolic impacts of

ADT, and in those participants on metformin, whether any of these effects are mitigated. As this is independent of progression, testing continues post progression. See [Table 2](#) for a schedule of assessments, please note it is permitted to obtain these measurements within 12 weeks of the scheduled follow-up visit. The summary of timing of Case Report Forms can be viewed in [Table 28](#) and [Table 29](#).

#### 7.1.4.A Cardiovascular Outcomes: Transdermal Oestradiol Comparison

Cardiovascular morbidity and mortality was the primary outcome measure for the first stage in the PATCH trial (completed in 2010), which showed similar rates of CVS events in participants receiving transdermal oestradiol compared to those receiving LHRHa injections (31). These results have been confirmed by longer-term data within the trial (see [Appendix I](#)). Continued monitoring of CVS outcomes will be undertaken by the PATCH IDMC for both the PATCH trial, as well as for the participants in STAMPEDE allocated to transdermal oestradiol together with their contemporaneous controls.

While Arm L participants are undergoing treatment with transdermal oestradiol, the majority of these CVS events will fall under the definitions of Serious Adverse Events (see [Section 11](#)). Once a participant has a cardiovascular event, the discontinuation of treatment with transdermal oestradiol may be considered at the discretion of the treating clinician and the participant switched to standard of care hormone therapy.

An increased risk of venous thromboembolism has been observed when docetaxel is used in combination with certain agents for the treatment of prostate cancer. Therefore, the rate of VTE and CVS events will be closely monitored among participants within Arm L who are receiving docetaxel as part of their first-line treatment. For more details see [Appendix I](#). However, within the PATCH trial (based on data up to 17-Sep-2017), no cardiovascular endpoint events had been reported among participants on transdermal oestradiol receiving upfront docetaxel.

#### 7.1.5 Additional Safety Assessments

The comparison specific follow-up schedules are summarised in [Table 1](#) and [Table 2](#). These summarise all the required additional safety assessments that are required whilst participants are receiving research treatments: abiraterone, enzalutamide, metformin and transdermal oestradiol. All safety assessments are required until research treatments have been permanently stopped for more than 30 days.

The summary of the timing of Case Report Forms also can be viewed in [Table 28](#) and [Table 29](#).

##### 7.1.5.A Additional Safety Assessment: Research Abiraterone with or without Enzalutamide

Due to the risk of liver toxicity and secondary hyperaldosteronism with abiraterone, all participants require regular monitoring of **potassium, liver function tests and blood pressure** whilst receiving research abiraterone with or without enzalutamide. Refer to [Section 6.2.2.C](#) for required frequency of monitoring. Participants from Arm J who remain on enzalutamide alone require regular monitoring of blood pressure. Refer to [Section 6.2.3.C](#) for required frequency of monitoring.

Confirmation that potassium and liver functions test have been performed regularly and blood pressure control reviewed will be required at each follow-up visit. Any abnormalities should be graded according to CTCAE version 4.03 and recorded on the toxicity section of the follow-up CRF; any abnormalities fulfilling the criteria for a SAE (e.g. requiring hospital admission) should also be reported on a SAE CRF (see [Section 11](#)).

Please note, the protocol guidance relates to research abiraterone i.e. treatment received by participants allocated to arms G and J. This may be used as a guide when using SOC abiraterone, but investigators should adhere to local practice.

#### 7.1.5.B Additional Safety Assessment: Enzalutamide

Participants in Arm J who stop abiraterone but continue with enzalutamide require ongoing monitoring of **blood pressure every 3 months** whilst receiving research enzalutamide. Safety blood tests are not routinely required for patients who remain on enzalutamide alone but can be completed at the discretion of the treating clinician.

#### 7.1.5.C Additional Safety Assessment: Metformin

Participants with normal and stable renal function receiving metformin require monitoring of **renal function (U&Es) every 6 months** whilst on treatment. More frequent monitoring is required in participants with declining renal function, or when initiating new potentially nephrotoxic medications or at times of intercurrent illness (see [Section 6.2.4.C](#)). Changes in renal function (eGFR, graded according to CTCAEv.4) are recorded on the Follow-up CRF. It is acceptable for blood sampling to be arranged via the GP at the participant's home or local hospital.

#### 7.1.5.D Additional Safety Assessment: Transdermal Oestradiol

Hormone levels are monitored while participants are on transdermal oestradiol, and if oestradiol levels are found to be >2000pmol/L with confirmed repeat test, please contact CTU for advice (see [Section 6.2.5.B](#)).

Real-time monitoring of testosterone, oestradiol and PSA levels is required in the first cohort of participants starting treatment with a combination of abiraterone, enzalutamide, or apalutamide alongside transdermal oestradiol (see [Section 6.2.5.C](#)).

## 7.2 DATA COLLECTION PROCEDURES

Treatment-related data are collected on Treatment Specific Logs. It is important that **all** treatments given for progressive disease are recorded on the Additional Treatment Log. The summary of timing of Case Report Forms can be viewed in [Table 29](#).

### 7.2.1 Data Collection For SOC Hormone Therapy

Information relating to SOC hormone therapy is recorded on the SOC Hormone Therapy Log, unless it is a treatment change for disease progression. The SOC Hormone Therapy Log should be updated with any changes in long-term hormone therapy e.g. if anti-androgens are being added to LHRHa for dual androgen blockade in the **absence of progression**. If however, anti-androgens are being added as an additional treatment for progressive disease, then this should be recorded on the Additional Treatment Log. Please note SOC hormone therapy refers to LHRHa, anti-androgens or orchidectomy.

If a participant allocated to receive transdermal oestradiol switches to receiving SOC Hormone Therapy i.e. LHRHa, in the **absence of progression**, then this information should be recorded on the SOC Hormone Therapy Log. However, any changes in hormone therapy initiated to treat disease progression should be recorded on the Additional Treatment Log e.g. switching from transdermal oestradiol to LHRH due to progressive disease.

### 7.2.2 Data Collection For SOC Systemic therapy: docetaxel, abiraterone, enzalutamide, or apalutamide

The decision to use docetaxel, abiraterone, enzalutamide or apalutamide as part of the standard-of-care (SOC) must be made before randomisation and should be recorded on the Randomisation CRF

to ensure the use of SOC agents is balanced between the control and research arms. The date of the starting systemic treatment should be recorded at the time of randomisation; this can be a planned date when randomisation occurs prior to systemic treatment commencing but should be within 12 weeks of starting hormone therapy (see [Section 6.1.3](#)). For participants allocated to arms A, K or L all further details should be recorded on the SOC Systemic Treatment CRF and this form sent to the CTU by the 24 week follow-up appointment. If a participant does not receive the planned systemic therapy, this must also be recorded on the SOC Systemic Treatment CRF, together with the reason why. For all participants who have started or planned to start SOC abiraterone, enzalutamide, or apalutamide, details relating to starting date of treatment, dose, and permanent stopping of SOC abiraterone, enzalutamide or apalutamide must be recorded on the SOC Systemic Treatment Log. If a participant does not receive the planned SOC treatment, this must also be recorded on the SOC Systemic Treatment CRF together with the reason why.

### 7.2.3 Data Collection And Non-Administration Of Standard Radiotherapy

The Radiotherapy Detail CRF should be completed for **all STAMPEDE participants** regardless of being planned for, or subsequently receiving, primary radiotherapy. Where radiotherapy is not reported as planned at randomisation, this form should still be received for confirmation it was not given. For participants where radiotherapy was reported as planned at randomisation but not given, a reason should be provided on the Radiotherapy Detail CRF for example, due to early metastatic progression or participant refusal, whether this is standard-of-care radiotherapy for participants (on any research arm) or research RT to the prostate for Arm H participants.

All radiotherapy and details should be recorded on the Radiotherapy Detail CRF upon completion of the RT schedule. We will now collect acute and late RT side-effects alongside other adverse events on the toxicity form.

### 7.2.4 Data Collection For Palliative Radiotherapy

Details of any radiotherapy given for progressive disease should be recorded on the Additional Treatment Log and if necessary (e.g. RT for bone pain) as a Skeletal related event (SRE) on the follow-up form.

### 7.2.5 Data Collection for Research (M1) Radiotherapy

**Arm H only:** all radiotherapy and acute side-effects details will be recorded on the Radiotherapy Detail and Radiotherapy Acute Toxicity CRFs upon completion of the RT schedule; any RT late side-effects should be recorded on the Follow-up CRF under the section for RTOG Toxicities.

In those cases where RT is not given (for example, due to early metastatic progression or participant refusal), this should be stated on the Radiotherapy Detail CRF together with the reason for non-administration of the treatment.

### 7.2.6 Data Collection for Additional Treatments Given for Disease Progression

All treatments given for disease progression are recorded on the Additional Treatment Log. Additional treatment should not be given in the absence of disease progression. This log should be updated with all subsequent changes to treatment. Only treatments for progressive disease need to be recorded; details of supportive treatments such as pain killers or bone-strengthening agents e.g. zoledronic acid, given to relieve symptoms, do not need to be provided.

In some scenarios, SOC hormone therapies such as LHRHa or anti-androgens may be given as a treatment for progressive disease. For example, LHRHa may be re-started on relapse for participants with M0 disease who discontinued hormone therapy and commenced surveillance. In addition,

participants allocated to transdermal oestradiol may switch to LHRHa on progression. Historically, some participants progressing on LHRHa will have commenced anti-androgens (dual androgen blockade) as a treatment for progression. In all cases, if treatment is being started for disease progression, treatment data are collected on the Additional Treatment Log and the details of the progression event recorded on the Progression Log.

Please note that any change in ADT which are solely a change in the participant's long-term hormone therapy, and not for disease progression, should be reported on the SOC Hormone Therapy Log only and **not** on the Additional Treatment Log.

### 7.3 FOLLOW-UP PROCEDURE

Every effort should be made to follow-up all participants who have been randomised up until formal closure of a comparison. Participants should, if possible, remain under the care of an oncologist or urologist for the duration of the trial. If care of a participant is returned to the GP, it is the responsibility of the responsible clinician who obtained the participant's consent to participate in the trial to ensure that all relevant data collection forms are completed. Nurse-led follow-up is permitted and should be conducted in line with local practice and procedures. This can also be performed by a suitably qualified individual who is delegated by the Principal Investigator.

If the participant moves away from the local area, arrangements should be made for trial follow-up to be undertaken by their new local site. Details of other participating site can be obtained from the STAMPEDE Trial Team. Information on participant transfer procedures is detailed in [Section 8.2](#). If the responsible clinician moves, appropriate arrangements should be made to arrange for trial follow-up to continue at the site.

All efforts should be made to preserve the initial participant's consent for long-term survival information to be flagged through national registries, for example NHS Digital (previously the Health and Social Care Information Centre); Office of National Statistics (ONS) in England/Wales; General Register Office in Scotland; Hospital Episode Statistics (HES) or Public Health England.

Please see [Section 8](#) for more information on early stopping of follow-up.

#### 7.3.1 Follow-up Telephone Consultations

In certain circumstances it may be appropriate to replace hospital visits with telephone consultations providing that it is still possible to collect all the necessary follow-up information. In these instances, it is acceptable to replace appointments with telephone consultations providing the required blood results and safety tests are available to the research team. All necessary information required to complete the Follow-up CRF is still required. All details on the telephone consultation must be recorded in the participants' notes as per in person assessments.

#### 7.3.2 Follow-up Using Electronic Healthcare Records

All participants are asked to provide consent to enable the CTU to improve the reliability of long-term follow-up data through linking to other sources of electronic healthcare data. This may include hospital based record systems, NHS digital and national registers, such as the office of national statistics or data held by public health England or other sources which hold relevant information about treatment or outcomes. To ensure study data is updated with accurate data held by others the CTU will collect direct identifiers (participant name and NHS number) and securely store this data for this purpose only, and separately from the trial database. This information will be securely transferred and used to verify the data received by the CTU.



## 7.4 TRIAL & COMPARISON CLOSURE

For the purpose of complying with UK the clinical regulations (UK Medicines for Human Use Act [Clinical Trials]), each comparison will only be considered ‘closed’ when active follow-up has ceased. Active follow-up is defined as hospital-based or telephone assessments required to be able to complete the scheduled follow-up assessments. This will be reviewed separately for each comparison after the point of the primary analysis and, if appropriate, later, updated analyses. Longer-term outcome data beyond this time point may be sought through linkage with national registers where possible (and where adequate consent has been obtained) and/or via site research teams. The end of the STAMPEDE Trial is defined as 12 months after the most recent participant, randomised to the last remaining comparison, has completed follow up. Follow-up may include the use of registry data.

### 7.4.1 Comparisons for which Follow-up has Ceased

In Q3-2018, active follow-up stopped for all trial participants allocated to the research arms within the “original comparisons”; this is defined as all participants allocated to arms B, C, D, E, and F together with all participants allocated to arm A recruited before 15-Nov-2011.

Active follow-up will be stopped to participants in the “M1|RT comparison” (i.e. those recruited to Arm H and the contemporaneously randomised metastatic participants allocated to Arm A), except for those participants who are in the control arm of the “enzalutamide + abiraterone comparison”. This follow-up will stop between Q4-2020 and Q1-2021 after sufficient data cleaning has been completed to allow reliable publication of long-term follow-up results. Targeted lists of all participants covered by this change will be disseminated to sites when the date is confirmed.

Active follow-up is defined as hospital-based or telephone assessments required to be able to complete the scheduled follow-up assessments. It should be noted that there may still be some data collection requested from sites to support ongoing sub-studies on closed comparisons. These requests may be for confirmation of health status or data already collected at sites e.g. baseline imaging data and FFPE tumour blocks.

For M1 participants on arm C and contemporaneous arm A, the PSA at baseline will be collected retrospectively where available. Further details regarding this data collection will be disseminated to the respective sites.

Given the above, any longer term analyses of data beyond comparison closure will be performed using observational data collected through national registers and NHS Digital or other datasets, providing such data are accessible.

CRFs, clinical notes and administrative documentation should be kept in a secure location (for example, locked filing cabinets in a room with restricted access). It is permissible to archive this information providing that it can be made accessible and available to the competent or equivalent authorities, the Sponsor, and other delegated authorities with suitable notice as the data may be subject to audit or inspection from any of the above. Information must be held for 25 years after the end of the trial as per [Section 13.1](#).

**Table 28: Summary of timing of case report forms (CRFs)**

| CASE REPORT FORMS                                                               | TIMING OF ASSESSMENT AND CRF                                                                                                                                                                                                                                                                                                                                                               |
|---------------------------------------------------------------------------------|--------------------------------------------------------------------------------------------------------------------------------------------------------------------------------------------------------------------------------------------------------------------------------------------------------------------------------------------------------------------------------------------|
| Baseline                                                                        |                                                                                                                                                                                                                                                                                                                                                                                            |
| Eligibility Checklist                                                           | At Randomisation                                                                                                                                                                                                                                                                                                                                                                           |
| Randomisation                                                                   | At Randomisation                                                                                                                                                                                                                                                                                                                                                                           |
| Saliva Pathology                                                                | At randomisation or any point on trial. When saliva sample has been taken and sent to Sponsor's designated laboratory.                                                                                                                                                                                                                                                                     |
| Treatment                                                                       |                                                                                                                                                                                                                                                                                                                                                                                            |
| SOC Hormone Therapy Log                                                         | To be completed for participants A-K, when treatment is first started and subsequently every time there is a change in SOC hormone therapy to report (including when Arm L participants switch to SOC HT pre-progression). To be sent in with the corresponding Follow-up CRF.                                                                                                             |
| SOC Systemic Therapy CRF (replaces SOC docetaxel CRF which is no longer in use) | To be completed for all participants randomised to STAMPEDE:<br>To be sent at 20 weeks after randomisation. A form is required for all participants to confirm which treatment received, including if no SOC systemic therapy received<br>Re-send upon completion of SOC abiraterone, enzalutamide or apalutamide treatment                                                                |
| Abiraterone and Enzalutamide Treatment Log (research treatment)                 | To be completed for participants on arms G or J, when treatment is first started and subsequently every time there is a dose change, treatment pause and re-start.<br>To be sent in with the corresponding Follow-up CRF.                                                                                                                                                                  |
| Metformin Treatment                                                             | To be completed for participants on arm K, when treatment is first started and subsequently every time there is a dose change, treatment pause and re-start.<br>To be sent in with the corresponding Follow-up CRF.                                                                                                                                                                        |
| Transdermal Oestradiol Treatment Log                                            | To be completed for participants on arm L, when treatment is first started and subsequently when reporting change in dose or type of patch.<br>For the transdermal oestradiol arm, the 6-week follow-up form can be completed at the same time as the 4-week visit for the hormone tests (see <a href="#">Section 6.2.5.B</a> )                                                            |
| RT Detail                                                                       | To be completed for all participants randomised to STAMPEDE: <ul style="list-style-type: none"> <li>• Upon completion of SOC RT</li> <li>• If planned RT is no longer planned (at 10 months after randomisation)</li> <li>• Arm H participants when research RT completed</li> <li>• Arm A participants with newly-diagnosed M1 disease at 3 months to confirm RT was not given</li> </ul> |
| Blood Form                                                                      | For arm J and contemporaneous A participants only. Taken at progression and end of first line treatment and pre-progression if participant has metastatic disease. Refer to the Sample Collection and Handling Manual for time points.                                                                                                                                                     |
| Metabolic sub study sample CRF                                                  | For arm K participants at selected sites recruited on protocol v21.0 that are participating in the metabolic sub study.                                                                                                                                                                                                                                                                    |

| CASE REPORT FORMS                                    | TIMING OF ASSESSMENT AND CRF                                                                                                                                                                                                                                                                                                                                                                                                                        |
|------------------------------------------------------|-----------------------------------------------------------------------------------------------------------------------------------------------------------------------------------------------------------------------------------------------------------------------------------------------------------------------------------------------------------------------------------------------------------------------------------------------------|
| Assessments                                          |                                                                                                                                                                                                                                                                                                                                                                                                                                                     |
| Follow-up                                            | To be completed at every comparison specific follow-up until comparison closure (See <a href="#">Table 1</a> and <a href="#">Table 2</a> for comparison specific assessment schedules)                                                                                                                                                                                                                                                              |
| Toxicity                                             | Required at each follow-up until 30 days after permanent stopping of protocol treatment (IMP).                                                                                                                                                                                                                                                                                                                                                      |
| Transdermal Oestradiol Treatment Hormone Results Log | To be completed whenever there are testosterone and oestradiol test results while arm L participants are on transdermal oestradiol.<br><br>For the first cohort of participants starting treatment with a combination of abiraterone, enzalutamide, or apalutamide alongside transdermal oestradiol, please immediately send the log to the CTU following any blood test in the first 3 months of treatment (see <a href="#">Section 6.2.5.C</a> ). |
| End of Research Treatment                            | To be completed when (each) allocated research treatment is permanently stopped or in the event that allocated research treatment is never started (in each case a reason for stopping/never starting should be provided).                                                                                                                                                                                                                          |
| Progression Log                                      | To be completed at the first occurrence of each progression event (PSA, local, nodal, distant metastases) and for each method of detection (clinical/symptomatic and objective/radiological).<br><br>Skeletal-related events confirmed as progression should also be reported here.                                                                                                                                                                 |
| Additional Treatment Log                             | To be completed each time a participant who has progressed starts or completes any additional treatment for progression.                                                                                                                                                                                                                                                                                                                            |
| Serious Adverse Event                                | To be completed following any Serious Adverse Event having confirmed none of the trial specific expedited reporting exemptions are met                                                                                                                                                                                                                                                                                                              |
| Death                                                | At Death                                                                                                                                                                                                                                                                                                                                                                                                                                            |
| Administration                                       |                                                                                                                                                                                                                                                                                                                                                                                                                                                     |
| Consent form                                         | At Randomisation and when re-consenting following transfer procedure                                                                                                                                                                                                                                                                                                                                                                                |
| Participant Transfer Confirmation Form               | To be completed when a participant is transferred to a different hospital for the administration of trial treatment and follow-up                                                                                                                                                                                                                                                                                                                   |
| Tissue Sample Form                                   | To be completed when sending tumour blocks to Sponsor's designated laboratory.                                                                                                                                                                                                                                                                                                                                                                      |
| Co-enrolment                                         | To be completed when a participant is co-enrolled in a post-progression interventional prostate cancer trial. Please see <a href="#">Section 5.2</a> for more information.                                                                                                                                                                                                                                                                          |

**Table 29: Schedule For Completion Of Treatment Forms For All Comparisons By Arm.**

| TIMING FROM RANDOMISATION |        |                | TREATMENT LOG <sup>1</sup> |
|---------------------------|--------|----------------|----------------------------|
| YEARS                     | MONTHS | WEEKS          |                            |
| <b>6-Weekly</b>           |        |                |                            |
| 0                         | -      | 6 <sup>2</sup> | G, J, K, L                 |
| -                         | -      | 12             | G, J, K, L                 |
| -                         | -      | 18             | G, J, K, L                 |
| -                         | 6      | 24             | G, J, K, L                 |
| <b>12-Weekly</b>          |        |                |                            |
| -                         | 9      | 36             | G, J, K, L                 |
| 1                         | 12     | 48             | G, J, K, L                 |
| -                         | 15     | 60             | G, J, K, L                 |
| -                         | 18     | 72             | G, J, K, L                 |
| -                         | 21     | 84             | G, J, K, L                 |
| -                         | -      | 96             | G, J, K, L                 |
| <b>6-Monthly</b>          |        |                |                            |
| 2                         | 24     | 104            | G, J, K, L                 |
|                           | 30     | 130            | G, J, K, L                 |
| 3                         | 36     | 156            | G, J, K, L                 |
|                           | 42     | 182            | G, J, K, L                 |
| 4                         | 48     | 208            | G, J, K, L                 |
|                           | 54     | 234            | G, J, K, L                 |
| 5                         | 60     | 260            | G, J, K, L                 |
| <b>Annual</b>             |        |                |                            |
| 6                         | 72     | -              | G, J, K, L                 |
| 7                         | 84     | -              | G, J, K, L                 |
| Etc.                      | -      | -              | G, J, K, L                 |

Key:

G = SOC + abiraterone

J = SOC + enzalutamide + abiraterone

K = SOC + metformin ± RT ± SOC docetaxel/abiraterone/enzalutamide/apalutamide

L = Transdermal oestradiol ± RT ± SOC docetaxel/abiraterone/enzalutamide/apalutamide

<sup>1</sup> For participants in Arm L on transdermal oestradiol, the hormone tests results are to be reported on the Transdermal Oestradiol Treatment Hormone Results Log

<sup>2</sup> For the transdermal oestradiol arm, the 6-week follow-up form can be completed at the same time as the 4-week visit for the hormone tests (see [Section 6.2.5.B](#))

## 8 STOPPING OF TREATMENT OR FOLLOW-UP

Participants should be given every encouragement to adhere to their allocated protocol treatment and follow-up schedule, in order to reduce bias. However, a participant has the right to withdraw consent for participation in any aspect of this trial at any time.

### 8.1 STOPPING RESEARCH INTERVENTIONS

A participant may stop **any STAMPEDE research treatment** for the following reasons:

- Unacceptable toxicity
- Intercurrent illness which prevents further treatment
- Participant refusal
- Any alteration in the participant's condition which justifies the discontinuation of treatment in the clinician's opinion

In all cases, the reason for permanent stopping of research treatment should be recorded on the End of Research Treatment CRF.

In the event of stopping research treatment, unless a participant states otherwise, consent is assumed for continued recording of trial data.

#### 8.1.1 Stopping Research Treatment: Abiraterone, Enzalutamide + Abiraterone

For **participants randomised to Arm G or J**, research treatment should also be discontinued for the following reasons:

- Disease progression whilst on therapy. As detailed in [Section 7.1.3](#), the disease event for stopping treatment may be after the first reportable Failure-Free Survival event. Treatment must be stopped once all three types (biochemical, radiological and clinical) of progression have occurred.
- Intention to commence a new systemic anti-cancer treatment due to evidence of relapse

Trial abiraterone must stop if other systemic treatments are initiated at any time for disease progression control (including chemotherapy, radium-223 etc). Anti-androgens (e.g. bicalutamide) should not be given in combination with abiraterone or enzalutamide due to the risk of toxicity. However, participants may continue on abiraterone or abiraterone and enzalutamide if they receive radiotherapy on a single occasion for a skeletal-related event. Sites must contact the STAMPEDE trial team for further guidance as appropriate.

#### 8.1.2 Stopping Research Treatment: Metformin

For **participants** randomised to Arm K, treatment duration is detailed in [Table 9](#).

Please note that in contrast to other treatments tested in STAMPEDE metformin does **not** need to be stopped following progression. Metformin treatment should aim to **continue post-progression** whilst participants continue to receive ADT.

Reasons for early stopping of metformin include:

- Decline in renal function (metformin must be stopped if  $GFR \leq 30 \text{ml/min/1.73m}^2$ , see [Section 6.2.4.C](#))
- Decline in performance status (WHO PS >2)
- Unacceptable toxicity
- Participant refusal

- Intercurrent illness preventing continued metformin treatment
- Investigator decision e.g. administration of IMP within a CTIMP in CRPC setting

If treatment is paused for >3 months or >50% of doses are missed for any reason, it is at the discretion of site investigators as to whether it is appropriate to restart trial treatment with metformin. Contact the CTU for any advice if required.

### 8.1.3 Stopping Research Treatment: Transdermal Oestradiol

For **participants randomised to Arm L**, treatment with transdermal oestradiol may be discontinued for the following main reasons:

- Unacceptable toxicity
- Participant refusal
- Intercurrent illness
- Investigator decision
- Cardiovascular event (see [Section 7.1.4.A](#))

For participants who stop transdermal oestradiol patches due to unacceptable toxicity or intercurrent illness, site investigators can consider changing treatment to LHRHa or allowing a break from hormone therapy. On re-initiation of hormone therapy, the investigator can choose whether it is in the participant's best interests to recommence transdermal oestradiol patches or LHRHa.

If transdermal oestradiol patches are chosen to restart, it is important to recommence with the loading regimen (See [Section 6.2.5.B](#)) and monitor oestradiol and testosterone levels closely. The process outlined for monitoring hormone levels and titrating doses at randomisation should be used when restarting transdermal oestradiol patches in order to ensure the correct dose is achieved.

In addition, if there is evidence of disease progression, subsequent therapy is at the discretion of the treating clinician with references to any relevant guidelines (see [Table 10](#)).

## 8.2 BREAKS IN SOC ADT

The SWOG trial (48) comparing intermittent versus continuous ADT in hormone sensitive metastatic prostate cancer did not find evidence to support that intermittent therapy was non-inferior for overall survival (hazard ratio for death with intermittent therapy 1.10; 90% confidence interval 0.99 to 1.23). Thus, STAMPEDE does not support intermittent androgen therapy as an appropriate upfront treatment approach.

Some participants will experience toxicity or report their QL is adversely impacted by ADT. In these instances we would recommend trying to ameliorate any symptoms with appropriate lifestyle or medical interventions, as per local or national guidelines. Please check that any treatment for symptoms will not interact with the trial treatment.

However, if the participant continues to struggle with ADT, treatment breaks can be considered, although this may impact the trial treatment as well – see below.

Participants who require breaks in SOC ADT due to unacceptable toxicity or an intercurrent illness can restart ADT as long as the investigators deems it is safe to do so, and as long as it remains in the participant's best interests.

All treatment stop and start dates must be recorded, with the reason for the break, on the hormone therapy and trial treatment logs so they can be considered during any data analyses.

### 8.2.1.A Impact on trial treatment if participant has a break in SOC ADT

#### **Abiraterone:**

Participants allocated to receive abiraterone as part of Arm G cannot continue their trial treatment whilst SOC ADT is stopped.

#### **Abiraterone in combination with Enzalutamide, or either treatment alone:**

Participants allocated to receive abiraterone with enzalutamide, or remain on either agent as monotherapy, as part of Arm J cannot continue their trial treatment whilst SOC ADT is stopped.

#### **Metformin:**

Participants allocated to receive metformin as part of Arm K should continue metformin as per the proposed treatment length at randomisation after stopping SOC ADT. This is as long as it remains in their best interests as assessed by the local clinician. See [Table 9](#) for specific instructions about the proposed length of metformin treatment for participants who receive radical treatment versus those who do not.

#### **Transdermal Oestradiol:**

Transdermal oestradiol patches replace SOC ADT treatment. Please see transdermal oestradiol section [8.1.3](#) for further details about breaks or stopping trial transdermal oestradiol patch treatment.

## 8.3 PARTICIPANT TRANSFERS

For participants moving away from the area and planning to transfer care, every effort should be made for the participant to be followed-up at another trial site. The participant will need to sign a new consent form at the new trial site. Once this has been done, the new trial site will take over responsibility for their ongoing participation in the trial.

To document the transfer process the main contact person at both the current and receiving hospitals should complete and sign the Patient Transfer Confirmation form. A fully completed form must be returned to the CTU prior to the participant transfer and any outstanding data queries for the participant should be completed prior to transfer.

On receipt of the completed transfer form, a member of the STAMPEDE team will confirm the database has been updated and request confirmation of the name of the participant's new clinician. Photocopies of the following documents may then be sent to the new hospital to complete the transfer and originals must also be retained at the original site for monitoring purposes:

- Consent form
- Completed CRFs
- Any documentation relating to the participant's participation in STAMPEDE (participant names must be removed from any documentation).

## 8.4 EARLY CESSATION OF TRIAL PARTICIPATION

If a participant explicitly withdraws consent to have any further trial data recorded, their decision must be respected and the CTU must be informed in writing in the form of a letter, a template is available upon request. All communication surrounding the early cessation of trial participation should be noted in the participant's records. Please note, data for the participant prior to this decision will still be required.

In the majority of cases, participants continue to give permission for their data and information on their health to continue to be collected via clinical notes and national registries. Any information on the follow-up status, however minimal, would be helpful. Investigators are encouraged to facilitate ongoing collection of follow-up data for example, through considering telephone consultations (see [Section 7.3.1](#)).

Early cessation of trial participation should not be undertaken lightly and the site must consider the implications for the trial and the participant in reaching such a decision. Without long-term data, the efficacy of trial treatments would be less reliable and could lead to inconclusive results. The early stopping of trial treatment should not lead to the early cessation of trial participation and in such cases follow-up assessments should be continued as per trial protocol.

Participants can change their minds about withdrawal at any time and reaffirm their consent to participate in the trial. Follow-up data should be collected only from the point of when consent was re-instated.



## 9 STATISTICAL CONSIDERATIONS

### 9.1 METHOD OF RANDOMISATION

Participants will be randomised centrally using a computerised algorithm developed and maintained by CTU. Randomisation will be performed using the method of minimisation over a number of clinically important stratification factors with an additional random element. To decrease determinability, the factors are not listed here but can be found in the Statistical Analysis Plan.

Participants will be randomised between arms as follows:

- All participants who fulfil both comparison-specific eligibility criteria for metformin and transdermal oestradiol will be allocated between A:K:L.
- All participants ineligible for metformin, but eligible for transdermal oestradiol, will be allocated between A:L
- All participants ineligible for transdermal oestradiol, but eligible for metformin, will be allocated between A:K.

See [Appendix H](#) for the allocation weighting of each arm by previous protocol version; this also shows allocation weighting for research arms previously closed to recruitment.

### 9.2 OUTCOME MEASURES

The definitive primary outcome measure for each comparison in the trial is overall survival (all-cause mortality), unless otherwise stated. The design of the trial is such that it is important to have additional intermediate primary outcome measures to assess activity in each research arm as the trial progresses.

For comparisons involving research arms B to J the intermediate primary outcome measure is failure-free survival (FFS); this and other outcome measures are listed in [Table 30](#). Note that this reflects the original analysis plan for research arm J.

**Table 30: Trial Outcome Measures by Comparison Stage (Arms B-J)**

| COMPARISON STAGE     | PRIMARY OUTCOME MEASURE                                                     | SECONDARY OUTCOME MEASURES                                                                                       |
|----------------------|-----------------------------------------------------------------------------|------------------------------------------------------------------------------------------------------------------|
| Pilot phase          | Safety*                                                                     | Feasibility                                                                                                      |
| Activity Stages (AS) | Failure-free survival (FFS)†                                                | Overall survival (OS)<br>Toxicity<br>Symptomatic skeletal events (SSE)                                           |
| Efficacy Stage (ES)  | Overall survival<br>Metastatic progression- free-survival (mPFS) – Arm J M0 | Quality-of-life<br>Cost effectiveness<br>Failure-free survival†<br>Toxicity<br>Symptomatic skeletal events (SSE) |

\*Based on toxicity

†Including biochemical failure (see Section 7.1.3)

For the “enzalutamide + abiraterone comparison” the original plans for the final Efficacy Stage analysis were updated in late 2019, after the earlier analysis stages had been completed. The updated efficacy stage analysis will use metastatic progression-free-survival (mPFS) as the definitive primary outcome measure for participants with baseline M0 disease, and overall survival as the primary outcome measure for participants with baseline M1 disease.

For the “metformin comparison” the intermediate and definitive primary outcome measure are the same, being overall survival; see [Table 33](#) for full details of all outcome measures for that comparison.

For the “transdermal oestradiol comparison”, overall survival and progression-free survival are the definitive co-primary outcome measures, and the intermediate primary outcome measure is progression-free survival (PFS); see [Table 35](#). The rationale for choosing progression-free survival rather than failure-free survival as the outcome measure for this comparison is outlined in [Section 9.7.3](#).

The reasons for different emphases in each recruitment stage are explained in [Section 9.3](#).

### 9.3 SAMPLE SIZE: PRINCIPLES

The design is a multi-arm multi-stage, multi-centre, platform, randomised controlled trial. There are a number of stages for each research arm: a Pilot/Feasibility/Safety Phase, Activity Stages and a final Efficacy Stage. Full details of the methodology underlying the trial design are given by Royston et al. (49, 50) The original sample size calculations were performed using the stage2 (version 1.2.0, Mar-2002) and stagen (version 1.1.1, May-2004) programs, both implemented in Stata (Stata Corp, TX) and updated using the later nstage program (version 1.0.3, Jun-2007; version 2.1.0, Jun-2009; version 3.0.1, Sep-2014). (51)

Other than transdermal oestradiol, we have adequately powered each comparison to detect an appropriate improvement in overall survival at the final Efficacy Stage, with high power at each of the planned interim Activity Stages to detect a pre-defined target difference in the intermediate primary outcome. For example, in a cohort with 2 years median FFS and 4 years median overall survival (OS) a target HR of 0.75 for research arm relative to control would translate into an absolute improvement in FFS of 10%, from approximately 50% to 60% at two years, and in OS of 10%, from approximately 50% to 60%, at four years.

The “transdermal oestradiol comparison” is powered only for contributing to a meta-analysis of participants from the STAMPEDE “transdermal oestradiol comparison” and the PATCH trial. It will assess non-inferiority of transdermal oestradiol in terms of overall and progression-free survival which are co-primary outcome measures. For details of the sample size calculations, planned analyses and corresponding operating characteristics, see version 10 of the PATCH protocol.

As each comparison is powered to detect a relative difference in survival, the analyses will be performed when the pre-planned number of events has been reported in the control arm, rather than after a certain number of participants have been recruited to the comparison or a certain amount of time has elapsed. Further details of the sample size calculations and varying assumptions for each research comparison are summarised in the relevant [Sections 9.4-9.8](#) and detailed in a separate Statistical Design Document which is available on request.

As with all trials, changes in both the standard-of-care and second-line therapies over time are possible which improve outcomes and thus will affect the observed control arm event rates and

associated reporting timelines. In particular, from protocol v8.0, standard-of-care RT was mandated for all participants with N0 M0 disease and no RT contraindication (this is likely to improve outcomes for this subgroup) and standard-of-care docetaxel permitted from protocol v14.0. Further agents are starting to be licensed for participants with castrate-refractory disease which may also improve survival rates. Improved FFS rates would delay the intermediate analyses, for comparisons where FFS is the intermediate primary outcome measure; while improved OS would delay the definitive analyses. Similarly, improved PFS rates could delay both the time of intermediate and definitive analysis for the "transdermal oestradiol comparison". For each comparison event rates are estimated based on data which are publicly available at the time of design. The Statistical Design Document for arms A-K includes models where median survival is varied around such estimated rates.

Figure 4: Schema of progress of STAMPEDE through the trial\*

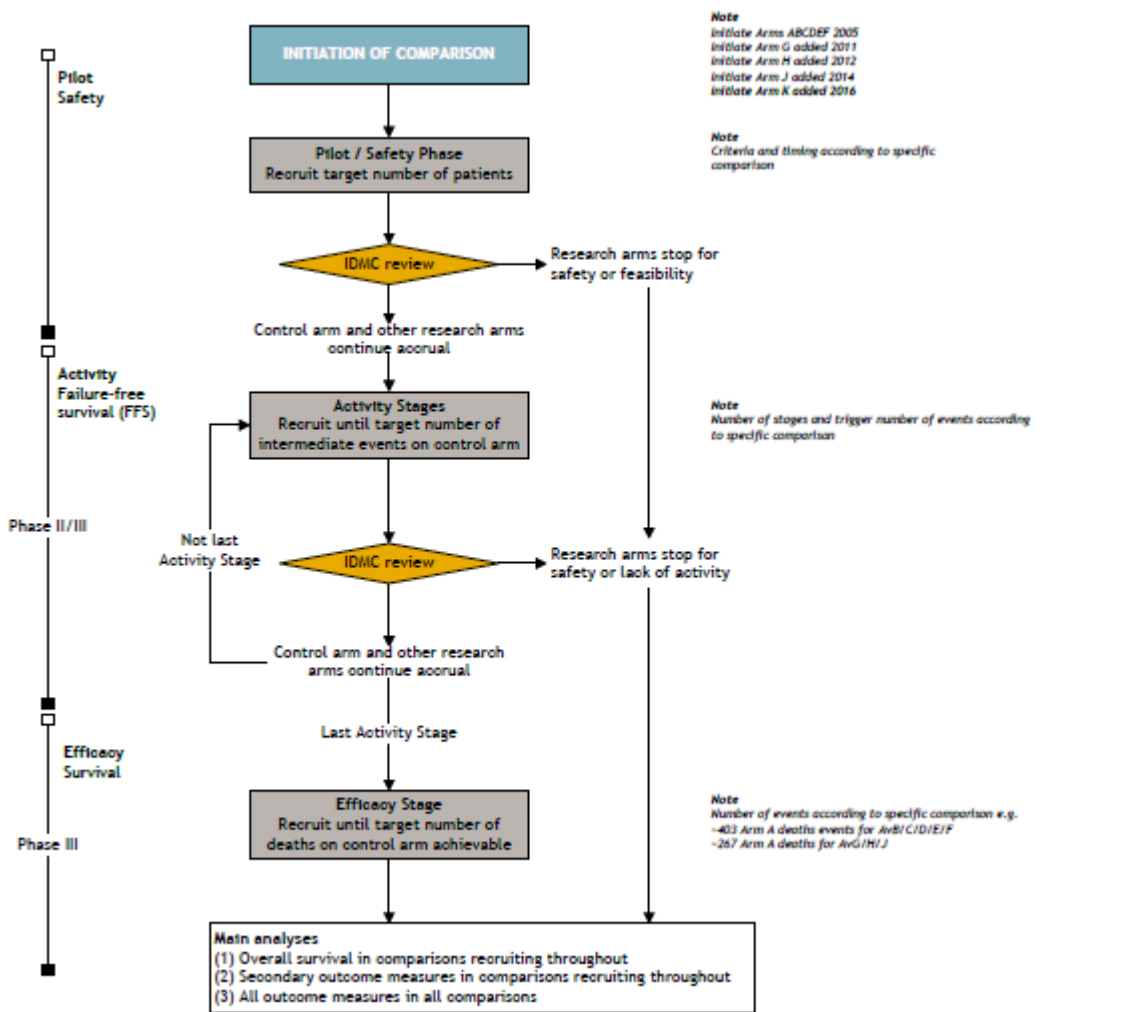

Key  
 FFS: Failure-free survival  
 HR: Hazard ratio  
 IDMC: Independent Data Monitoring Committee  
 Pts: Patients

Notes  
 Exact accrual depends on many factors including accrual rate, event rate and arms recruiting in each stage

\* Except for the “transdermal oestradiol comparison”

## 9.4 SAMPLE SIZE ISSUES & TRIAL STAGES: ADDITIONAL RESEARCH ARM H

This is the “M1|RT comparison” and includes participants allocated to research Arm H (SOC+RT) and newly-diagnosed M1 participants with no contraindication to RT allocated to the control Arm A whilst Arm H was open to recruitment. Suitability for allocation to the comparison was assessed before randomisation to ensure comparability with contemporaneous control arm participants.

**Table 31: Guidelines for stopping accrual to additional research Arm H**

| ACTIVITY STAGE | SIG LEVEL | POWER | TARGETED HR | NUMBER OF CONTROL ARM EVENTS | CONSIDER DISCONTINUATION IF (HROBSERVED) IS... |
|----------------|-----------|-------|-------------|------------------------------|------------------------------------------------|
| I              | 0.50      | 95%   | 0.75        | ~75                          | >1.00                                          |
| II             | 0.25      | 95%   | 0.75        | ~142                         | >0.92                                          |
| III            | 0.10      | 95%   | 0.75        | ~221                         | >0.89                                          |

### 9.4.1 Pilot Phase: Additional Research Arm H

The IDMC reviewed safety data, in the context of data from the control arm, when the first 30 participants allocated to Arm H had been on trial for around six months.

### 9.4.2 Activity Stages I-III: Additional Research Arm H

The same principles were applied to this new comparison as to previous comparisons and an equal allocation ratio of control arm participants to participants allocated to Arm H was employed, as for Arm G. The number of control arm events required to trigger the intermediate analyses are the same as for the “abiraterone comparison” (see [Table 31](#)).

### 9.4.3 Efficacy Stage IV: Additional Research Arm H

The analysis of Efficacy Stage IV for this comparison was planned for when ~267 deaths had been observed in the relevant control arm participants. This was to give 90% power to detect the targeted hazard ratio of 0.75 at one-sided significance level of 0.025.

### 9.4.4 Sample Size For Additional Research Arm H

Consideration was given to ceasing further randomisations to Arm H if it was not showing sufficient evidence of activity on the intermediate primary outcome measure (FFS), as for the other research arms. This research comparison is relevant to around 60% of participants joining STAMPEDE. At the point of the scientific approval, accrual was averaging around 80 participants per month to the trial; therefore, up to approximately 48 participants a month would be eligible for the comparison. If accrual to the trial was slower at 70 participants per month, then accrual to this comparison could be between 18 and 42 participants per month, depending on which other trial arms are open to recruitment at the time.

We were targeting a 25% relative improvement in overall survival following local radiotherapy to the prostate in this participant group. This is the same size of effect targeted with the other research arms in STAMPEDE. This relative improvement can be further justified in the light of MRC PR07 which demonstrated an improvement of this magnitude for adding radiotherapy to ADT in locally-advanced disease, with a hazard ratio for overall survival of 0.77 (95% CI 0.61 to 0.98). In that trial, fewer than half of the deaths were from prostate cancer, whereas in newly-diagnosed metastatic participants nearly all people will die of their disease. Therefore, it is relevant to note the relative benefit of radiotherapy in PR07 in terms of prostate cancer-specific survival, where the hazard ratio was 0.46 (95% CI 0.34 to 0.61) after a median follow-up time of 8 years (52).

We anticipated that around 1250 participants were required over 4 years to observe 267 control arm deaths after 5.25 years. This assumed that (i) recruitment was constantly 70 pts/m to the trial overall; (ii) the original research arms stopped accrual within 6 months after activation of the RT arm; (iii) the abiraterone arm stopped accrual around 24 months after activation of the RT arm; and (iv) a further new research arm with an equal allocation ratio was introduced 18 months after activation of the RT arm. In Protocol version 13.0, we reflected on these four points: (i) recruitment to the trial has been faster; (ii) the original research arms completed accrual 2 months after activation of the RT arm; (iii) the abiraterone arm stopped accrual 12 months after activation of the RT arm; and (iv) Arm J was activated 18 months after activation of the RT arm, Arm H.

Of participants joining STAMPEDE during this time, 60% have been eligible for the “M1|RT comparison”. Prior to randomisation, a RT schedule had to be nominated: Weekly or Daily. We have observed that around half of participants in the comparison are nominated for RT with the Daily schedule and half for the Weekly schedule, primarily chosen by trial site with participant groups nominated for each schedule observed to be comparable at baseline. There will likely be interest to know the effect of each RT schedule when the main results are reported. This will be explored by “within schedule” comparisons of participants randomised to research vs control (arms H vs A) within each nominated RT schedule.

To ensure adequate power for these “within schedule” analyses, in Protocol version 13.0, the target sample size was increased from 1,250 participants up to around 1,800 participants, resulting in an approximate increase in the split by planned RT schedule from 625 to 900 in each “within schedule” analysis. A FFS analysis “within schedule” was carried out at the time of the “main analysis”; this was predicted to have ~300 control arm FFS events by schedule (FFS “within schedule” analysis parameters: target HR=0.75, power 90%, 1-sided  $\alpha=0.015$ ). For either of the RT schedules showing evidence of an effect on FFS, a comparative “within schedule” analysis was planned to be carried out on survival when ~199 control arm deaths are observed in that schedule comparison. This is a closed test with OS only formally compared within schedule if there is an advantage in FFS for that RT schedule at the main analysis. Thus, extending recruitment enables a secondary analysis of the impact of RT on survival by planned “RT schedule” to happen within around 18 months from the first main analysis.

All sample scenarios are documented in the Trial Master File.

All participants joining the trial will be starting long-term ADT for the first time. The focus of this comparison is on the newly-diagnosed, metastatic participants (with no contraindications to RT), which is the largest subgroup of participants in the trial and the group of participants at highest risk of death from prostate cancer. Participants with non-metastatic disease will be excluded from this particular comparison as there are already randomised data demonstrating the survival benefit from radiotherapy in participants with locally-advanced disease. Radiotherapy is now mandatory in node negative participants; it is also recommended in the node-positive, non-metastatic (N+ M0) group. Relapsing participants are also excluded from this comparison.

For the control arm of the whole trial, we constructed sample size scenarios based on median failure-free survival being 18, 24 or 30 months; the event rate would depend on the participant mix. We now know that around 60% of participants have M1 disease at trial entry and we have reported that FFS at 24 months is 51% across the whole of the control arm participant sample.(53)

For the updated sample size calculation for the “M1|RT comparison”, we based our estimates on the subgroup of participants with newly-diagnosed M1 disease in the control arm. Therefore, we

estimated median FFS for control arm participants in this comparison to be 1 year and estimated that median overall survival would be around 3.5 years.

## 9.5 SAMPLE SIZE ISSUES & TRIAL STAGES: ADDITIONAL RESEARCH ARM J

This is the “enzalutamide + abiraterone comparison” and includes participants allocated to research Arm J (SOC + enzalutamide + abiraterone) and participants contemporaneously allocated to the control Arm A.

Note that as of Protocol version 20.0 the details of the Efficacy Stage analysis for the “enzalutamide + abiraterone comparison” have changed to reflect separate analyses for non-metastatic (M0) and metastatic (M1) participants and a broadening of the therapeutic intervention being tested. See below for further information.

### 9.5.1 Pilot Phase: Additional Research Arm J

The IDMC first reviewed safety data for this combination when the first 50 participants allocated to Arm J had been on trial around 6 weeks (i.e. to the first follow-up visit).

Furthermore, an additional review of safety was performed when these 50 Arm J participants had been on trial for around 6 months. Safety is routinely reviewed at regular intervals and additional safety reviews will be performed if the IDMC raises any concerns.

Direct comparison will be available with contemporaneously randomised participants on Arm A (SOC alone). Contextual data will be provided from Arm G (SOC plus abiraterone). Indicative safety data may also be available on the combination from other studies in CRPC.

### 9.5.2 Activity Stages I-II: Additional Research Arm J

The principles of intermediate analyses were applied to this new comparison as to previous comparisons, but some of the details were different, and an equal allocation ratio of control arm participants to participants allocated to Arm J was employed; as for Arms G and H. Owing to the expected accrual rate to the trial (>100 pts/m), the expected slower event rate in all participants given improvements to SOC and specifically in participants randomised to this comparison. Given the simultaneous recruitment of M1 (but not M0) participants to the “M1 | RT comparison”, only two activity stages were planned before accrual completed. These are set out in [Table 32](#).

The IDMC intermediate activity stage reviews were completed in Nov-2015 and Mar-2016 for Arm J and recommended continuation of the comparison.

**Table 32: Guidelines for stopping accrual to the additional research Arm J**

| ACTIVITY STAGE | SIG LEVEL | POWER | TARGETED HR | NUMBER OF CONTROL ARM EVENTS | CONSIDER DISCONTINUATION IF (HROBSERVED) IS... |
|----------------|-----------|-------|-------------|------------------------------|------------------------------------------------|
| I              | 0.40      | 95%   | 0.70        | ~66                          | >0.957                                         |
| II             | 0.12      | 95%   | 0.70        | ~139                         | >0.869                                         |

### 9.5.3 Efficacy Stage III: Additional Research Arm J

The analysis of the final Efficacy Stage for this comparison was originally planned to be performed when around 267 deaths had been observed in the control arm. This would give 90% power to detect the targeted hazard ratio of 0.75 at a one-sided significance level of 0.025.

In late 2019 the plans for the Efficacy Stage III analysis of the “enzalutamide + abiraterone comparison” were updated. See section 9.5.5 for further details.

#### **9.5.4 Sample Size For Additional Research Arm J**

Consideration was given to ceasing further randomisations to Arm J if it was not showing sufficient evidence of activity on the intermediate primary outcome measure (FFS), just as for the other research arms.

The participant mix for this comparison is likely to represent a more favourable prognosis on average than in the original comparisons, due to concurrent recruitment of M1 but not M0 participants, to Arm H.

We anticipated that around 1,800 participants were required within 3.5 years to observe ~267 control arm deaths within 6 years. The default scenario assumes that (i) recruitment is constantly 70pts/m to the trial overall, (ii) Arm H (M1|RT) accrues throughout and (iii) a further new research arm with an equal allocation ratio is introduced 18 months after activation of Arm J. The stopping date for Arm G is no longer an assumption.

Variations on these factors are documented in a Statistical Design Document. If accrual rates to the trial were at 150pts/m (as observed during summer 2013), accrual of around 1,800 participants to the comparison could be achieved within 2 years. These sample scenarios are documented in the Trial Master File.

Updating the standard-of-care to include docetaxel has minimal impact on the projected time to maturity of the “enzalutamide + abiraterone comparison”.

#### **9.5.5 Update to Efficacy Stage Analysis For Additional Research Arm J**

In Protocol version 20.0 the planned Efficacy Stage analysis of the “enzalutamide + abiraterone comparison” was updated. This followed the larger-than-expected improvement in overall survival seen in the primary analysis of the “abiraterone comparison”; evidence from other trials combining enzalutamide with abiraterone did not result in further efficacy gains; and continued divergence in the aims of first-line therapy for patients with baseline metastatic and non-metastatic disease since the comparison was conceived.

In late 2019, the STAMPEDE TMG and TSC approved an updated analysis plan designed to test the impact of the addition of the more broadly-defined therapeutic intervention of androgen receptor (AR)-targeted therapy on patient outcomes, compared to SOC treatment alone. Patients from the “abiraterone comparison” (A vs G) and the “enzalutamide + abiraterone comparison” (A vs J) will be included in a combined analysis comparing the addition of AR-targeted therapy (abiraterone or the combination of enzalutamide and abiraterone) to SOC with SOC alone. Those with baseline M0 disease at entry to the study will be analysed separately to those with baseline M1 disease.

##### Non-metastatic (M0) patients

The Efficacy Stage analysis for these patients will test whether adjuvant AR-targeted therapy improves survival compared to SOC alone, using the primary outcome of metastatic progression-free-survival (mPFS).

A total of 1,982 patients with M0 disease were randomised to arms G or J or contemporaneously to the control arm. We plan to perform the Efficacy Stage analysis when a total of 315 mPFS events have been observed in the control arm patients for this sub-group. This will provide 90% power to



confirm a treatment effect equivalent to a HR of 0.75 for AR-targeted therapy, at the 1.25% one-sided significance level, based on an assumption of 70% survival in the control arm at 66 months.

### Metastatic (M1) patients

The Efficacy Stage analysis for these patients will validate whether a new biomarker that includes lobular vs basal transcriptomic sub-classification (PAM50) is predictive of differential response to adjuvant AR-targeted therapy. Prior to the data freeze for the analysis, as many M1 patients as possible will be classified into one of two subgroups, biomarker positive (luminal B) and biomarker negative (basal), based on the results of the biomarker assay. The primary outcome measure will be overall survival.

A total of 1,916 patients with M1 disease were randomised to arms G or J or contemporaneously to the control arm. The timing and power for the planned analysis will depend on the proportion of these patients who are successfully classified using the biomarker assay. For example, if 50% of patients are classified, we expect to have 80% power to confirm an interaction between allocation to adjuvant AR-targeted therapy and biomarker classification at the two-sided 5% significance level if the analysis is performed in the spring of 2022, based on a minimum follow-up duration of 70 months. This assumes that 40% of patients will be classified as 'positive' and the remaining 60% as 'negative', with an anticipated treatment effect equivalent to a HR of 0.85 for AR-targeted therapy in the 'positive' group and a treatment effect HR of 0.45 for patients in the 'negative' biomarker group, equivalent to a hazard ratio ratio (HRR) of 1.9.

Further details of the calculations and assumptions underpinning the Efficacy Stage analysis planned for both subgroups can be found in the SAP for the "enzalutamide + abiraterone comparison".

## **9.6 SAMPLE SIZE ISSUES & TRIAL STAGES: ADDITIONAL RESEARCH ARM K**

This is the "metformin comparison" and includes participants allocated to research Arm K (SOC + metformin) and the equivalent non-diabetic participants with no contraindication to metformin contemporaneously allocated to the control Arm A whilst Arm K is open to recruitment. Suitability for allocation to the comparison is assessed before randomisation to ensure comparability with contemporaneous control arm participants

### **9.6.1 Implementation: Additional Research Arm K**

The implementation of the MAMS principles are different in this comparison for the following reasons:

- Although all non-diabetic participants will be eligible for allocation to the "metformin comparison", the timing of the analyses will be driven only by the M1 participants. (See [Section 9.6.4](#) for discussion of the implications for power overall and in M0/M1 subgroup analyses.)
- Failure-free survival will not be used as the intermediate primary outcome measure; overall survival will be used as both the intermediate and definitive primary outcome measure. This is because we are not convinced that any comment on metformin's usefulness should be determined from an ability to act on a PSA-driven outcome measure. Furthermore, treatment with metformin is intended to continue throughout long-term hormone therapy which may include going well beyond an FFS event, particularly in M1 participants.
- The target HR is 0.80 for overall survival (a 20% relative improvement). This is a smaller relative improvement in survival than targeted for previous comparisons because of metformin's known low toxicity profile, the low cost of the drug and the potential positive

effects on metabolic parameters and morbidity; a smaller impact on overall survival may still have clinical benefit.

## 9.6.2 Outcome Measures: Additional Research Arm K

Table 33 lists the outcome measures for this comparison and can be compared with the outcome measures for the other comparisons in Table 30.

**Table 33: Trial outcome measures by stage for the “metformin comparison”**

| COMPARISON STAGE       | PRIMARY OUTCOME MEASURES | SECONDARY OUTCOME MEASURES                                                                                                                                                                                                                                                                                                                         |
|------------------------|--------------------------|----------------------------------------------------------------------------------------------------------------------------------------------------------------------------------------------------------------------------------------------------------------------------------------------------------------------------------------------------|
| Pilot phase            | Safety*                  | Feasibility<br>Metabolic effects§<br>Cardiovascular event: major adverse cardiac events‡                                                                                                                                                                                                                                                           |
| Activity Stage (AS) I  | Overall survival         | Failure-free survival† (FFS)<br>Symptomatic skeletal events (SSE)<br>Toxicity<br>Metabolic effects §<br>Cardiovascular event: major adverse cardiac events‡                                                                                                                                                                                        |
| Efficacy Stage (ES) II | Overall survival         | Metastatic progression-free survival (M0 participants)<br>Progression free survival (M1 participants)<br>Toxicity<br>Symptomatic skeletal events (SSE)<br>Failure-free survival† (FFS)<br>Metabolic effects §<br>Quality-of-life<br>Cost effectiveness<br>Correlative outcomes <sup>¶</sup><br>Cardiovascular event: major adverse cardiac events‡ |

\*Based on toxicity

§Including changes in: BMI; Haemoglobin A1c (HbA1c); waist circumference and a new diagnosis of diabetes mellitus

‡MACE; nonfatal MI, nonfatal stroke, & death from CVS causes

†Including biochemical failure (see Section 6.1.2 and Appendix J)

¶Plasma lipid and fasting triglyceride levels, fasting plasma glucose  
Sarcopenia and/or radiological progression free survival (rPFS)

Plasma insulin

AMP Kinase

**Note:** All arms are unblinded so primary outcome measures for this comparison are objectively measured with caution to be taken around interpretation of more subjective secondary outcome measures such as symptomatic skeletal events

### 9.6.3 Pilot Phase: Additional Research Arm K

The IDMC reviewed safety data for this comparison when the first 50 participants allocated to Arm K had been on trial around 12 months. Furthermore, analyses were conducted on metabolic parameters (see Table 33). If there was harm observed in metabolic effects, or any serious concerns regarding the toxicity profile, recruitment would be stopped; there were no formal criteria to guide this.

Safety is routinely reviewed at regular intervals and additional safety reviews will be performed if the IDMC raises any concerns.

### 9.6.4 Activity Stage I: Additional Research Arm K

The principles of intermediate analyses will be applied to this new comparison as to previous comparisons, but some of the details will be different, and an equal allocation ratio of control arm participants to participants allocated to Arm K is employed; as for Arms G, H and J. Owing to the expected accrual rate to the trial overall (>100 pts/m) and the interim primary outcome being overall survival, only one intermediate activity stage is planned before accrual is completed; this is set out in Table 34.

Although analyses are triggered by events in M1 participants, they will include all participants in the “metformin comparison”; this will have high power. A separate subgroup analysis in M1 participants (conventionally-powered) and M0 participants (limited power) will then look at consistency of effect; few deaths in M0 participants are expected at this time. The IDMC recommendation will be based on the totality of the available data, including safety, metabolic and compliance data.

The IDMC reviewed the intermediate activity stage data for Arm K in May 2020 and recommended continuation of the comparison.

**Table 34: Guidelines for stopping accrual to the additional research Arm K**

| ACTIVITY STAGE | SIG LEVEL | POWER | TARGETED HR | NUMBER OF CONTROL ARM EVENTS | CONSIDER DISCONTINUATION IF $HR_K$ (OBSERVED) IS... |
|----------------|-----------|-------|-------------|------------------------------|-----------------------------------------------------|
| I              | 0.40      | 92%   | 0.80        | ~121 M1 deaths               | >0.965                                              |

### 9.6.5 Efficacy Stage II: Additional Research Arm K

The analysis of the final Efficacy Stage for this comparison will be performed when around 473 deaths have been observed for M1 participants randomised contemporaneously to the control arm. This would give 92% power to detect the targeted hazard ratio of 0.80 at a one-sided significance level of 0.025 at the final Efficacy Stage, and 86% pairwise power overall.

As with the intermediate activity, this analysis will include all participants in the comparison, with a separate subgroup analysis in M1 and M0 participants looking at consistency of effect. At this time point we predict approximately 100 control arm M0 deaths will be observed. Further subgroup analyses, defined by the stratification factors, are planned to check for consistency of effect at intermediate and final analyses. Due to this comparison being powered for overall survival in M1 patients, the relatively high OS for M0 patients means that analysis of OS in this subgroup will not have high power. As such, an additional outcome measure of metastasis-free survival will be analysed as part of the subgroup analysis.

### 9.6.6 Sample Size For Additional Research Arm K

Consideration would be given to ceasing further randomisations to Arm K if it did not show sufficient evidence of improvement on overall survival at the intermediate analysis.

We anticipate that around 2,800 participants, including around 1,700 M1 participants, are required over 3 years to observe ~473 control arm M1 deaths over around 7 years. (This is a revision from the initial target – see [Section 9.6.7](#)). This number and time will be dependent on the observed overall survival. The default scenario assumes (i) recruitment is constantly 100pts/m to the trial overall, (ii) co-recruitment throughout of the equivalent of one other research arm, and (iii) the majority of metastatic participants will also have docetaxel but non-metastatic participants will not. Variations on these factors are documented in a Statistical Design Document. Sample scenarios are documented in the Trial Master File.

Updating the standard-of-care to permit first-line use of docetaxel was assumed within the sample size scenarios and is reflected in the projected time to maturity of the “metformin comparison”.

### 9.6.7 Further Sample Size Issues For Additional Research Arm K

Analyses for the “metformin comparison” will be timed from randomisation. The point of randomisation compared to the start of hormone therapy may differ, depending on the planned use of docetaxel. This practical information will be reviewed by the TMG and IDMC.

For the development of Protocol v19, the sample size calculations for the “metformin comparison” were discussed by the TMG and revised to the estimates as presented in Section 9.6.4 – Section 9.6.6.

The original sample size estimates for this comparison were based on a lower target for power than the previously-added comparisons, with 90% power for the interim analysis, 85% power for the final analysis and 80% pairwise power overall. The observed accrual to the “metformin comparison” is higher than forecast. Therefore the TMG took the opportunity to revisit the sample size target for the “metformin comparison”.

The revised sample size estimates aim for a higher target power of 92% at both interim and final analysis with 86% pairwise power overall, increasing the analysis power for this comparison in line with that of previous STAMPEDE comparisons. These revisions have resulted in the overall sample size for the comparison increasing from 1800 patients in Protocol v18 to 2800 patients in Protocol v19. This was determined to be achievable within the forecast timelines for recruitment i.e. by the end of 2019, and has the benefit of bringing forward the reporting timelines by approximately one year.

## 9.7 SAMPLE SIZE ISSUES & TRIAL STAGES: ADDITIONAL RESEARCH ARM L

This is the “transdermal oestradiol comparison” and includes participants allocated to research Arm L (transdermal oestradiol ± RT ± docetaxel) and the equivalent, eligible participants contemporaneously allocated to the control Arm A (SOC).

The phase III evaluation of the clinical efficacy of transdermal oestradiol will ultimately be based on the relevant data from this comparison within STAMPEDE and the PATCH trial, combined using an individual participant data meta-analysis. The overall evaluation is based on a non-inferiority design.

### 9.7.1 Implementation And Outcome Measures: Additional Research Arm L

The transdermal oestradiol evaluation is based on the following approach.

#### 9.7.1.A Earlier Stages In The PATCH Trial

- The early stages of the PATCH trial already demonstrated the safety and early activity of transdermal oestradiol in comparison to LHRH therapy (see [Appendix I](#)) (31). The pilot phase (completed in 2010, n=254) showed the rates of cardiovascular events in the transdermal oestradiol and LHRH arms were similar, and the castration rates were equivalent. These results were confirmed by longer-term data including nearly 900 patients enrolled up to Oct-2015.
- A pre-planned, confidential interim analysis undertaken in Jun-2013, based on progression-free survival, at the end of the Phase II component of the PATCH trial, led the PATCH IDMC to recommend further recruitment for an extension to Phase III. That analysis included 638 patients with 206 PFS events, and reviewed data against a pre-specified non-inferiority margin hazard ratio of 1.25 with a 1-sided alpha 0.25.

#### 9.7.1.B STAMPEDE And PATCH Meta-analysis

- To assess the clinical efficacy of transdermal oestradiol, the relevant data from the STAMPEDE “transdermal oestradiol comparison” will be combined with that data from all patients recruited into PATCH; the data from STAMPEDE will not be analysed alone.
- As the eligibility criteria with respect to the timing of start of ADT differs between the STAMPEDE “transdermal oestradiol comparison” and the PATCH trial (see [Section 4.3.1](#)), the “transdermal oestradiol comparison” will undergo an initial Pilot Phase to assess castration rates and safety among those participants on Arm L. This will also include a safety review of participants receiving transdermal oestradiol in combination with docetaxel. The data will be reviewed by the PATCH IDMC when there are 30 participants in Arm L who have been followed up for at least 18 weeks. A feasibility review will also be performed at the same time.
- The pre-planned Activity Stage II, on intermediate primary outcome measure progression-free survival, will take place based on combined data from the STAMPEDE “transdermal oestradiol comparison” participants and PATCH patients.
- The same approach will be used at the final Efficacy Stage, with progression-free and overall survival as definitive co-primary outcome measures (see PATCH Protocol v13.0 for further details). The rationale for choosing progression-free survival as both the intermediate primary outcome measure and as part of the definitive co-primary outcome measure for the “transdermal oestradiol comparison” is outlined in [Section 9.7.3](#)

**Table 35** summarises the outcome measures for each stage of this research comparison. The target sample size for the meta-analysis of the “transdermal oestradiol comparison” is approximately 2,500 participants, with around 700 to be recruited through the STAMPEDE “transdermal oestradiol comparison”. By Feb-2017, around 1,200 patients had been recruited directly to the PATCH trial.

**Table 35: Trial outcome measures by stage for the “transdermal oestradiol comparison”**

| COMPARISON STAGE                  | DATA SOURCE(S)            | PRIMARY OUTCOME MEASURES                       | SECONDARY OUTCOME MEASURES                                                                |
|-----------------------------------|---------------------------|------------------------------------------------|-------------------------------------------------------------------------------------------|
| Pilot phase (completed 2010)      | PATCH trial               | Cardiovascular morbidity and mortality         | Castration rates<br>Other toxicities<br>Metabolic effects                                 |
| Activity Stage I (completed 2013) | PATCH trial               | Progression-Free Survival*                     | Cardiovascular and other toxicities<br>Castration rates<br>Metabolic effects              |
| Activity Stage II <sup>‡</sup>    | PATCH and STAMPEDE trials | Progression-Free Survival*                     | Cardiovascular & other toxicities                                                         |
| Efficacy Stage III <sup>‡</sup>   | PATCH and STAMPEDE trials | Progression-Free Survival*<br>Overall survival | Cardiovascular & other toxicities<br>Prostate cancer specific survival<br>Quality-of-life |

\* Defined as the earliest among biochemical failure, clinical progression (local progression, lymph node progression, distant metastases), or death from any cause (see [Section 9.7.3](#)).

† In addition, there is Pilot Phase to assess castration rates and safety among Arm L participants within STAMPEDE, since the eligibility criteria with respect to timing of start of ADT differs between the transdermal oestradiol comparison within STAMPEDE and the PATCH trial (see [Section 4.3.1](#)).

‡ The timing of these analyses is determined by when a pre-specified number of events for the primary outcome measure have been observed in the control arms for the PATCH and STAMPEDE trials combined. Please see the PATCH Protocol v10.0 for further details.

### 9.7.2 Additional Use of Outcome Data from the “transdermal oestradiol comparison”

Participants allocated to the “transdermal oestradiol comparison” may provide additional consent to participate in translational sub-studies, see [Section 4.7](#) for details. Subsequent correlative analysis using outcome data from these participants will be undertaken by the STAMPEDE team and collaborators, overseen by the STAMPEDE BRG and other STAMPEDE oversight committees.

### 9.7.3 Definition of PFS and Use As Co-primary Outcome Measure: Additional Research Arm L

Note that the definition of progression-free survival (PFS) used within the “transdermal oestradiol comparison” analyses differs slightly to that of failure-free survival used for other research comparisons within STAMPEDE. This is because it includes death from any cause as an event- i.e. both PCa deaths and non-PCa deaths (see [Appendix C](#) for further details of the definition of progression). Progression-free survival is hence defined as time from randomisation to the first of: biochemical failure, clinical progression or death from any cause.

The use of PFS rather than FFS for the “transdermal oestradiol comparison” has no practical impact on STAMPEDE. The rationale for choosing PFS as part of the co-primary outcome measure for the “transdermal oestradiol comparison” is to capture any potential effects on survival due to the different toxicity profiles between transdermal oestradiol and LHRH.

Although PFS and survival are co-primary endpoints, their respective primary analyses will be triggered at different timepoints particularly because PFS is likely to contain a relatively low proportion of deaths as the contributing first PFS event.

#### **9.7.4 Abiraterone/Enzalutamide/Apalutamide enhanced safety monitoring**

Most patients with metastatic disease entering the trial prior to the COVID-19 pandemic received docetaxel as part of their standard treatment. However, following the COVID-19 pandemic, clinicians have the option to offer alternative therapies including enzalutamide, abiraterone, or apalutamide. There is no experience of combining these agents with transdermal oestradiol patches (though no significant interaction is anticipated) an enhanced safety monitoring study will be conducted. This will involve close monitoring of all patients who receive these agents in combination with transdermal oestrogen including testosterone, oestradiol, PSA levels and any events reported through SAE forms in real time.

In addition, the IDMC will formally review the enhanced safety monitoring data utilising a Simon Two Stage design, based on the castration rates at twelve weeks among patients still undergoing treatment with patches, with a significance level of 5% and power of 80%. The enhanced safety monitoring study will test a null response of 78% (P0) against an alternative response of 93% (P1), the level observed in patients receiving patches alone. The optimal design requires at least 8/10 patients to be castrate at stage I, and 37/43 patients to be castrate at stage II. Alongside efficacy data, toxicity data will undergo clinical review, and both aspects will be considered before deciding whether further patients should be treated with the combination. Any concerns raised by any aspect of the data will be discussed between the IDMC and appropriate TMG members, with any recommendations discussed with the TSC.

Clinicians have the option to treat patients with any of enzalutamide, abiraterone, or apalutamide. Initial analyses will consider patients who receive any of these treatments. If sufficient patients receive any particular one of these treatments, secondary analyses will look within each treatment.

## **9.8 FURTHER NOTES ON TRIAL DESIGN**

### **9.8.1 Overall Sample Size**

Given the adaptive nature of the study, there is no formal overall sample size target, but the numbers of participants required for each comparison are detailed in [Sections 9.4-9.7](#). To date, more than 11,000 participants have been recruited overall.

### **9.8.2 Factorial Design**

We note here that we did not employ a factorial design in the original design of this trial because we anticipated the possibility of synergy between SOC, zoledronic acid and docetaxel and between SOC, zoledronic acid and celecoxib.

It would not be possible to assess any such interactions reliably in a factorial trial (see the Statistical Design Document for further details).

## 9.9 INTERIM MONITORING AND ANALYSES

The accumulating data will be reviewed at regular intervals (approximately annually) by an Independent Data Monitoring Committee (IDMC), including pre-specified formal intermediate analyses of activity data (see also [Section 16](#)). These analyses will be performed by the trial team at CTU. Only participants randomised contemporaneously, and eligible for that comparison, will be included in the comparison of each research arm against control e.g. participants allocated to the control arm prior to Protocol version 15.0 will not contribute to the "metformin comparison" (Arm A vs Arm K). For the "transdermal oestradiol comparison", the relevant STAMPEDE data will only be analysed as a meta-analysis in combination with the PATCH trial. Therefore, interim data from this comparison will be reviewed by the PATCH IDMC.

The IDMC will be asked to give advice on whether the accumulating data from the trial justifies continuing recruitment of further participants or further follow-up; guidelines for discontinuation of accrual for the relevant Activity Stages, together with results from any other relevant trials will aid them in this. A decision to discontinue recruitment, either in all participants or in selected subgroups, will be made only if the result is likely to convince a broad range of clinicians including those entering participants into the trial and the general clinical community. The intermediate stopping guidelines apply to the intermediate primary outcome measure.

To stop accrual early for benefit in any comparison would require convincing data in terms of the definitive primary outcome measure, overall survival. For example, this could be one-sided  $p < 0.0005$  as proposed by Haybittle-Peto.(54, 55) The use of such a guideline for stopping for benefit has a minimal impact on the operating characteristics.

If a decision is made to continue without change, the IDMC will advise on the frequency of future reviews of the data on the basis of accrual and event rates. The IDMC will make recommendations to the Trial Steering Committee (TSC, see [Section 16](#)) as to whether the trial should continue in its present form. While the trial is ongoing the accumulating data will generally remain confidential, unless the TSC and IDMC agree that the data should be made public.

## 9.10 OUTLINE ANALYSIS PLAN

Analyses will be performed on an intention-to-treat basis.

For comparisons involving arms A-K, the standard unadjusted log-rank approach will be applied to analyses of intermediate and definitive primary outcome measures. The impact of potential confounders including the stratification factors used at randomisation will be considered in a Cox proportional hazards model.

Flexible parametric models will be used to calculate the absolute differences between the arms to show treatment differences over time and to estimate restricted mean "survival" times (RMST). The estimated difference in RMST will be used preferentially to compare treatment arms if the proportional hazards assumptions required for hazard ratios cannot be supported.

In the "transdermal oestradiol comparison," a meta-analysis approach will be used to combine data from the STAMPEDE and PATCH trials. The analysis will also take into account the change in randomisation ratio partway through the PATCH trial (from 2:1 for transdermal oestradiol versus LHRH before Feb-2011, to 1:1 thereafter). In addition, as the comparison uses a non-inferiority design, sensitivity analyses will be conducted based on a number of pre-defined descriptions for the per-protocol population.



### 9.10.1 Pilot / Safety Phases

Feasibility of the trial originally, and now of individual research comparisons, was and still is considered in terms of acceptability of the trial randomisation, reported toxicities and adherence to trial medication. Sites participating in the Pilot Phase for the original research arms were required to keep an anonymised log of all participants assessed for trial eligibility (see protocol v2.0) so that the number of participants who did not participate in the study and the number of eligible participants who chose to not participate in the study could be summarised (reasons for non-participation were collected where the participant was willing). The anonymised logs are no longer needed for new research arms (since protocol v8.0).

For each research comparison we shall describe the incidence of expected and unexpected severe toxicities and adverse events/reactions (see [Section 11.1.1](#)) amongst the participants who are randomised to the comparison to decide whether to continue beyond this Pilot/safety Phase.

### 9.10.2 Activity And Efficacy Stages

The approach to analysis of these stages is summarised within the sample size calculations (see earlier subsections of [Section 9](#)). Each research arm will be compared in a pairwise fashion against the contemporaneously recruited control arm, except for the planned Efficacy Stage analyses for the “enzalutamide + abiraterone comparison”, in which patients allocated to AR-targeted therapy (arms G and J) will be compared against contemporaneously recruited control arm patients.

Full details are available in the relevant Statistical Analysis Plan. See [Figure 4](#) for an overview of the schema of progress.

## 10 MONITORING AND QUALITY ASSURANCE

### 10.1 DATA MONITORING

To ensure patient safety and data integrity is maintained to a high standard, remote and on-site monitoring will be conducted throughout the lifetime of the study.

#### 10.1.1 Central Monitoring Of Consent

Anonymised copies of the participant's initial consent form (including the additional research consent) should be sent to the STAMPEDE team at the CTU, as soon as randomisation has been completed. Once the consent has been received and reviewed by the CTU the participants "treatment and follow up schedule" can be released to sites.

Any subsequent re-consent forms should be sent as soon as possible to enable central monitoring and recording of consent. The dates and signatures should be visible on the copies sent to the CTU; however the name of the participant must be omitted. Any queries resulting after central monitoring will be redirected to sites for clarification. The original non-anonymised consent forms should be kept at site in the Investigator Site File.

#### 10.1.2 Central Monitoring Of Data

Data provided to the CTU will be checked for data errors, inconsistent and missing data. The STAMPEDE team will issue data clarification requests, query reports or address issues identified via email with site staff. Data Quality and site performance sites will be reviewed, issues identified when appropriate will be fed back to sites. Sites may be identified for training or onsite monitoring through central monitoring checks.

#### 10.1.3 Direct Access to Patient Data

Participating investigators should agree to allow trial-related monitoring, including audits, ethics committee review and regulatory inspections by providing direct access to source data and documents as required. Patients' consent for this must be obtained. A list of source data use for the trial and their locations should be maintained by the site.

#### 10.1.4 Monitoring Visits to Investigator Sites

A selection of institutions will be visited during the course of the STAMPEDE trial. The CTU will give the responsible investigator prior notice of the monitoring visit to allow adequate time, space and staff for these visits. The standard operating procedures (SOPs) for monitoring are available from the CTU.

After the monitoring visit the monitor will complete a site visit report. Once the TMT have reviewed the report and agreed on any recommendations the monitor will finalise the report and send a copy to the Principal Investigator (PI) at the site. A copy will be kept in the CTU STAMPEDE Trial Master File.

Remote or self-monitoring could be utilised through the course of the trial. Site staff may be asked to scan and send anonymised sections of a participant's medical record to the CTU for remote verification or asked to complete a form to confirm compliance with protocol procedures.

## **10.2 CONFIDENTIALITY**

All information collected during the course of the research will be kept strictly confidential. In addition, all procedures for handling, processing, storage and destruction of data are compliant with the Data Protection Act 1998. No individual participants will be identified when results from the trial are published.

Participants are asked to give their permission for information about their health status to be obtained from the Office of National Statistics (ONS), via NHS Digital (formerly HSCIC), Public Health England, National Cancer Research Advisory Service, or any similar or national equivalent. This will facilitate data collection and verification and reduce the burden on sites. In addition, participants will be asked for permission to inform their GP of their involvement in the STAMPEDE trial.

## 11 SAFETY REPORTING

The principles of GCP require that both investigators and sponsors follow specific procedures when reporting adverse events/reactions in clinical trials. These procedures are described in this section of the protocol and in [Section 7.1.5](#).

Further information on the expected toxicities for the protocol treatments (investigational medicinal products (IMPs)) being tested in arms on active follow-up can be found in the reference safety information (RSI) accessible via the STAMPEDE website:

<http://www.stampedetrial.org/centres/essential-documents/reference-safety-information-rsi/>.

### 11.1 SAFETY REPORTING DEFINITIONS

The definitions of the EU Directive 2001/20/EC Article 2 based on the principles of GCP apply to this trial protocol. These definitions are given in [Table 36](#).

**Table 36: Event Terms and Definitions**

| TERM                                                                                                                   | DEFINITION                                                                                                                                                                                                                                                                                                                                                                                                                                                                                                  |
|------------------------------------------------------------------------------------------------------------------------|-------------------------------------------------------------------------------------------------------------------------------------------------------------------------------------------------------------------------------------------------------------------------------------------------------------------------------------------------------------------------------------------------------------------------------------------------------------------------------------------------------------|
| Adverse Event (AE)                                                                                                     | Any untoward medical occurrence in a clinical trial participant to whom a medicinal product has been administered. These include occurrences which are not necessarily caused by the product.                                                                                                                                                                                                                                                                                                               |
| Adverse Reaction (AR)                                                                                                  | Any untoward and unintended reaction to an investigational medicinal product related to any dose administered.                                                                                                                                                                                                                                                                                                                                                                                              |
| Unexpected Adverse Reaction (UAR)                                                                                      | An adverse reaction, the nature or severity of which is not consistent with the information about the medicinal product in question set out in reference safety information (summary of product characteristics or Investigator brochure) for that product.                                                                                                                                                                                                                                                 |
| Serious Adverse Event (SAE) or Serious Adverse Reaction (SAR) or Suspected Unexpected Serious Adverse Reaction (SUSAR) | Respectively any adverse event, adverse reaction or unexpected adverse reaction that fulfils the definition of <b>serious</b> : <ul style="list-style-type: none"> <li>• results in death</li> <li>• is life-threatening*</li> <li>• requires hospitalisation or prolongation of existing hospitalisation**</li> <li>• results in persistent or significant disability or incapacity</li> <li>• consists of a congenital anomaly or birth defect</li> <li>• Other important medical condition***</li> </ul> |

#### Clarifications and Exceptions

\*The term 'life-threatening' in the definition of 'serious' refers to an event in which the participant was at risk of death at the time of the event; it does not refer to an event which hypothetically might have caused death if it were more severe.

\*\*Hospitalisation is defined as an inpatient admission, regardless of length of stay, even if the hospitalisation is a precautionary measure for continued observation. A&E attendances are not defined as a hospitalisation unless participants are admitted. Hospitalisations for a pre-existing condition, not thought to have been exacerbated by STAMPEDE protocol treatment or IMPs (including elective procedures that have not worsened) do not constitute an SAE.

\*\*\* Medical judgement should be exercised in deciding whether an AE/AR is serious in other situations. Important AE/ARs that are not immediately life-threatening or do not result in death or hospitalisation but may jeopardise the

participant or may require intervention to prevent one of the other outcomes listed in the definition above, should also be considered serious.

### 11.1.1 Adverse event definitions

Adverse events (AE) include:

- An exacerbation of a pre-existing illness
- An increase in frequency or intensity of a pre-existing episodic event or condition
- A condition (even though it may have been present prior to the start of the trial) detected after trial drug administration
- Continuous persistent disease or a symptom present at baseline that worsens following administration of the study treatment

NB: Within STAMPEDE non-melanoma skin cancers (e.g.: basal cell carcinoma and squamous cell carcinoma) are not considered important medical conditions and therefore are considered adverse events, unless they fulfil any of the other “serious” criteria – detailed in [Table 36](#).

**Serious Adverse Events (SAE)** are AEs that fulfil the definition of serious as detailed in [Table 36](#). SAEs are reported using the SAE CRF. If the event is assessed as possibly, probably or definitely related to a protocol treatment (IMP), it is categorised as a Serious Adverse Reaction (SARs). If the reaction is unexpected based on the approved reference safety information, it is categorised as a Suspected Unexpected Serious Adverse Reaction (SUSAR), see [Table 37](#).

**Notable Adverse Events (NAE)** these include pregnancy occurring in a partner of a STAMPEDE participant. Pregnancies must be followed up until outcome, whether this is a live birth, stillbirth, or planned or spontaneous abortion. NAEs should be reported on the SAE CRF, in the same manner as SAEs.

### 11.1.2 Defining “treatment” for the purposes of safety reporting

STAMPEDE is an adaptive platform protocol in which research treatments are given in addition to standard-of-care (SOC) therapies, or as alternatives in the case of transdermal oestradiol. As per MHRA recommendations **all protocol treatments** (i.e. both protocol SOC and protocol research treatments) and are regarded as **investigational medicinal products** (IMPs) within the STAMPEDE platform for the purposes of safety reporting.

**Protocol treatments (IMPs):**

- **Protocol SOC treatments** are IMPs that are standard forms of treatment permitted as part of the STAMPEDE protocol.
  - Licensed ADT (e.g. LHRH analogues) given in the setting of hormone-sensitive prostate cancer
  - Docetaxel given in hormone-sensitive prostate cancer
  - Abiraterone given in hormone-sensitive prostate cancer
  - Enzalutamide given in hormone-sensitive prostate cancer
  - Apalutamide given in hormone-sensitive prostate cancer

Please note, if a participant allocated to transdermal oestradiol switches to standard ADT in the absence of progression, this would still be considered as being on protocol treatment (IMP).

- **Protocol research treatments** are the IMPs that are additional or alternative treatments participants allocated to research arms on active follow-up (G-L) receive as part of the STAMPEDE protocol:

- Arm G: abiraterone
- Arm J: abiraterone & enzalutamide
- Arm K: metformin
- Arm L: transdermal oestradiol

Note, the research treatment in arm H (prostate RT) is not an IMP, but safety reporting requirements to the CTU are the same.

**Non-protocol treatments:**

- All prostate cancer treatments commenced post disease progression (as defined in the protocol – [Section 7.1.3](#)).
- ADT given after progression, (e.g.: commenced in HSPC setting and now continues for the management of CRPC, or ADT given after progression after completing M0 course of treatment - See [Figure 5](#)).

## 11.2 SITE INVESTIGATOR RESPONSIBILITIES

The Site Investigator may be any medically qualified individual delegated to undertake safety reporting for the STAMPEDE trial. It is recommended that the Principal Investigator delegate safety reporting to at least one other individual in order to ensure reporting cover during their absence.

### 11.2.1 Notification period

All events that fall within the notification period must be reported, events outside the notification period do not need reporting.

**Adverse Events (AEs):** All AEs are reportable from the time of randomisation until 30 days after discontinuation of protocol treatment (IMPs)\* (refer to [Section 11.1.2](#)). All AEs should be recorded in the participant’s medical notes and on the Toxicity (AE) CRF linked to the Follow-up CRF. The Toxicity (AE) CRF should be sent to the CTU within one month of the corresponding Follow-up CRF being due.

**Serious Adverse Events (SAEs):** All unrelated events i.e. SAEs are reportable from the time of randomisation until the participant has progressed AND is 30 days after discontinuation of all protocol treatment (IMPs)\* (refer to [Section 11.1.2](#)) or comparison closure (see [Section 7.4](#) for definition of comparison closure).

\*N.B. ADT before progression is a protocol SOC treatment (IMP). However, even though ADT following progression is not protocol SOC treatment (IMP) the reporting period continues until depot expiry of the last dose before progression + 30 days is completed. Therefore when the participant is on ADT in the form of LHRHa, this is assumed to be 30 days after the depot expiration date (e.g. up to 8 weeks after administration of a 4-week depot or 16 weeks after administration of a 12-week depot) following the final dose given before progression was diagnosed (See [Figure 5](#)).

**Serious Adverse Reactions (SARs and SUSARs):** All related SAEs i.e. all SARs and SUSARs are reportable from the time of randomisation until comparison closure (see [Section 7.4](#) for definition of comparison closure).

**Notable Adverse Events:** All notable adverse events are reportable from randomisation until comparison closure, using the SAE CRF. Notable Adverse Events must be reported within 24 hours of the investigator being made aware of the event using the SAE CRF.

**All SAEs must be reported within 24 hours of the investigator being made aware of the event using the SAE CRF and the Investigator is responsible for providing follow up information for SAEs until resolution.**

**Figure 5: Diagram to show notification/reporting period for AEs and SAEs occurring on LHRHa**

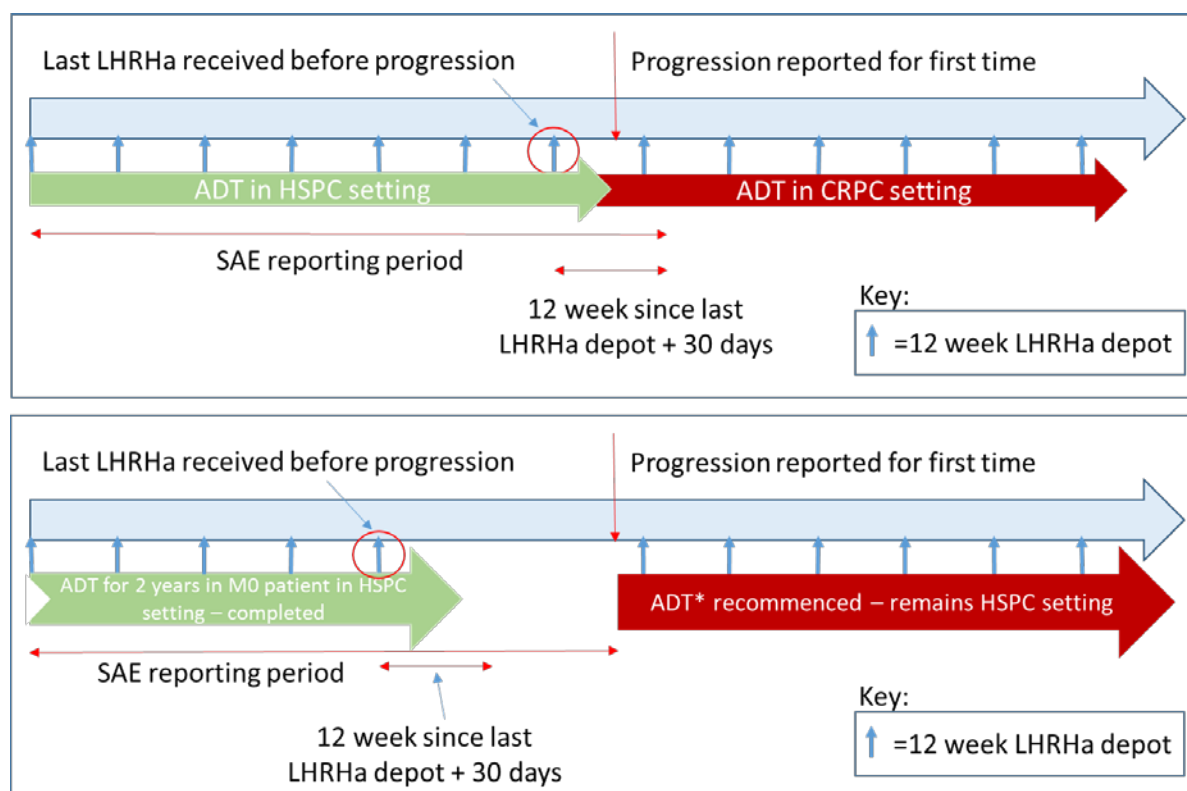

\*Any additional treatment started at this stage eg: abiraterone would not be considered IMP

### 11.2.2 Trial-Specific “Expedited Reporting” Exemptions

The following events which may fulfil the definition of “serious” are exempt from expedited reporting. They are still require to be reported as an AE on the Toxicity (AE) CRF, or on an alternative CRF e.g. progression log, which will be used to report these events to the MHRA, but an SAE CRF is not required.

- **Death as a result of disease progression or disease-related deaths:** Do not complete an SAE CRF, unless death is considered to be caused by trial treatment (i.e. a SAR). The details should be reported on the Death Form.
- **Non-fatal progression events:** events that fulfil the definition of serious e.g. result in hospital admission, but are due to disease progression are exempt from reporting as an SAE, instead details should be provided on the Progression Log.
- **Elective hospitalisation** and surgery for treatment of locally-advanced or metastatic prostate cancer or its complications. These should be recorded as a non-trial inpatient admission on the follow-up form under Non-Trial visits.
- **Elective hospitalisation** to simplify treatment or procedures. If related to prostate cancer, record as non-trial inpatient admission on the follow-up form.

### 11.2.3 Investigator Assessment

#### 11.2.3.A Seriousness

When an AE occurs the investigator or delegate **must** assess whether the event is serious. Refer to **Table 31** for what fulfils the criteria of serious and **Section 11.2** for a list of exemptions from expedited reporting.

#### 11.2.3.B Grading severity of adverse event

The severity (i.e. intensity) of all AEs **must** be graded using Common Terminology Criteria for Adverse Events (CTCAE) v4.03. The complete CTCAE v4.03 can be found at:

<http://www.stampedetrial.org/centres/tools-training/training-materials-resouces/>

Any questions concerning this process should be directed to the CTU team in the first instance.

#### 11.2.3.C Causality

The Investigator **must** assess the causal relationship of all serious events or reactions in relation to protocol treatment using the definitions in **Table 32**.

#### 11.2.3.D Notification responsibilities for non-protocol treatments

It should be noted that ADT, docetaxel, abiraterone, enzalutamide and apalutamide may be given as non-trial treatments in the management of CRPC. It is not necessary to report AEs or SAEs relating to this non-trial use where the treatment commenced post progression. Instead the yellow card system should be used to notify the regulatory authorities of adverse drug reactions in this setting:

[\(https://yellowcard.mhra.gov.uk/\)](https://yellowcard.mhra.gov.uk/)



Figure 6: SAE reporting flowchart

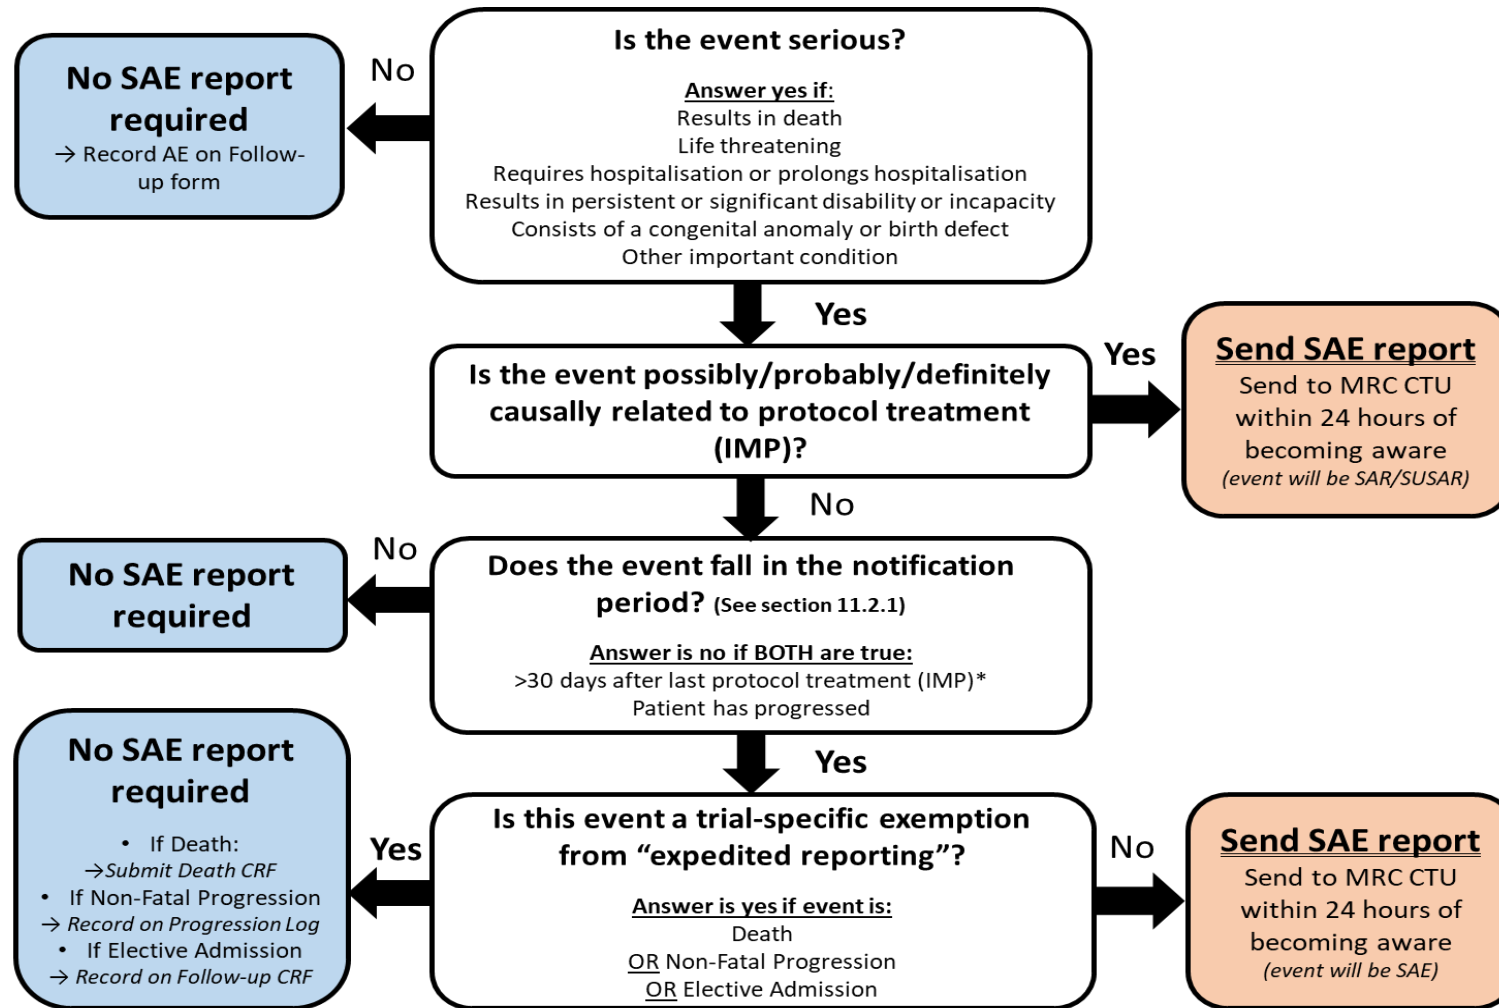

\*Exposure to LHRHa is assumed to be until the depot expiration date, therefore unrelated SAEs are reportable up until 8 weeks after the administration of a 4-week depot or 16 weeks after the administration of a 12-week depot.

### Box 1: SAE report notification checklist

Before sending the SAE CRF please check that the event falls within the notification period and does not meet any of the “exemption from expedited reporting criteria”, see [Section 11.2](#). The SAE CRF must be submitted within 24 hours of an Investigator becoming aware of the event. The following are the minimum criteria required for initial processing and review:

1. At least **two** patient identifiers
2. **One event term** that can be coded to CTCAE version 4.03
3. Indication of why the event was **serious**
4. **Grade** severity of event/reaction according to CTCAE version 4.03
5. Date of **onset** when the event met the criteria of serious. Please refer to [Table 31](#)
6. Provide details for **all protocol treatments (IMPs) allocated** (i.e. both protocol SOC and protocol research treatments, including any allocated protocol research treatment that has not started) whether ongoing or completed at time of event onset.
7. Assessment of **causality** in relation to **each** protocol treatment (i.e.: both protocol SOC and protocol research treatments, including any allocated protocol research treatment that has not started) – *please note this can be provided later if clinician is not available within 24 hours of becoming aware of the event. This can be completed by the trial team based on correspondence with site clinician, and signed by the clinician at a later date.*
8. **Signature** (This can be a site trial team member in the first instance to meet the reporting timelines, but the CRF must be re-sent once a clinician has reviewed and signed the form)

#### SAE REPORTING

Fax to 020 7670 4818 within 24 hours of becoming aware of the event  
Or send via **encrypted** email to [mrcctu.stampede@ucl.ac.uk](mailto:mrcctu.stampede@ucl.ac.uk)

#### 11.2.4 Event Follow-up

Participants must be followed up until clinical recovery is complete or stabilised (resolution of the event – this can include an outcome that the event is “resolved with ongoing sequela”). Follow-up should continue after completion of protocol treatment if necessary. The Investigator is responsible for providing follow up information for SAEs until resolution. Follow-up information should be updated on the original SAE CRF by ticking the box marked “follow-up” and faxing to the CTU as information becomes available. Extra information and/or copies of test results may be provided separately but must be anonymised. The participant must be identified by trial ID and initials only. The participant’s name should not be used on any correspondence.

## 11.3 CTU RESPONSIBILITIES

The STAMPEDE trial team will acknowledge receipt of all SAEs via email. Please contact the STAMPEDE trial team if an acknowledgement email is not received within 3 working days.

At least one medically qualified person at the CTU, or comparison chief-investigator or another appropriate TMG member will review all SAE reports received. The rationale for answers provided can be discussed between the site and CTU, however, ultimately the causality assessment given by the local Investigator at the hospital cannot be overruled.

The CTU is undertaking the duties of trial sponsor and is responsible for the reporting of SUSARs and other SARs to the regulatory authorities (through the MHRA to competent authorities in other European member states) and the UK research ethics committees. Additionally, the CTU has sponsor oversight for reporting in other countries in which the trial is taking place. The CTU is responsible for reporting fatal and life-threatening SUSARs to the UK competent authorities within 7 days of the CTU becoming aware of the event; other SUSARs must be reported within 15 days.

SAKK (Schweizerische Arbeitsgemeinschaft für Klinische Krebsforschung), the Swiss Group for Clinical Cancer Research coordinate site participation for STAMPEDE, and are responsible for reporting SUSARs to the relevant Swiss competent authority and lead ethics in accordance to their local regulations, on behalf of the CTU.

The CTU will also keep all investigators informed of any safety issues that arise during the course of the trial.

The CTU will submit Annual Safety Reports in the form of a Developmental Safety Update Report (DSUR) to Competent Authorities (Regulatory Authority and Ethics Committee).

Any drug companies involved will also be notified of reportable (serious and unexpected and drug-related/unknown relationship) events as per their agreement with the sponsor. CTU will also provide companies with a copy of the Annual Safety Report in the required format.

### 11.3.1 Sponsor (CTU) Assessment

#### 11.3.1.A Expectedness

If there is at least a reasonable possibility of causal relationship to the protocol treatment (all IMPs i.e. SOC and research), an assessment of the expectedness of the event will be made by the Sponsor (the STAMPEDE team at the CTU). This determines whether a reaction is a SAR or SUSAR, see [Table 37](#).

Expectedness is determined using the current reference safety information (RSI) (i.e. summary of product characteristics section 4.8 or current investigator brochure) approved for the trial. An event is considered unexpected if it is:

- Not listed in the RSI
- If severity exceeds that listed in the RSI
- If frequency exceeds that listed in the RSI
- If event outcome exceeds that listed in the RSI

**Table 37: How causality and expectedness determine event outcome (SAE/SAR/SUSAR)**

| CAUSAL RELATIONSHIP (RELATEDNESS) | DESCRIPTION                                                                                                                                                                                                                                                                                                        | EXPECTEDNESS ASSESSED BY CTU                                      |                     |
|-----------------------------------|--------------------------------------------------------------------------------------------------------------------------------------------------------------------------------------------------------------------------------------------------------------------------------------------------------------------|-------------------------------------------------------------------|---------------------|
|                                   |                                                                                                                                                                                                                                                                                                                    | EXPECTED REACTION                                                 | UNEXPECTED REACTION |
| Definitely                        | There is clear evidence to suggest a causal relationship and other possible contributing factors can be ruled out.                                                                                                                                                                                                 | SAR                                                               | SUSAR               |
| Probably                          | There is evidence to suggest a causal relationship and the influence of other factors is unlikely.                                                                                                                                                                                                                 |                                                                   | SUSAR               |
| Possibly                          | There is some evidence to suggest a causal relationship (e.g. because the event occurs within a reasonable time after administration of the trial medication). However, the influence of other factors may have contributed to the event (e.g. the participant's clinical condition, other concomitant treatments) |                                                                   | SUSAR               |
| Unlikely                          | There is little evidence to suggest there is a causal relationship (e.g. the event did not occur within a reasonable time after administration of the trial medication). There is another reasonable explanation for the event (e.g. the participant's clinical condition, other concomitant treatment).           | Unrelated SAE<br>No assessment required as unrelated to treatment |                     |
| Unrelated                         | There is no evidence of any causal relationship                                                                                                                                                                                                                                                                    | Unrelated SAE<br>No assessment required as unrelated to treatment |                     |

## 12 ETHICAL CONSIDERATIONS AND APPROVAL

### 12.1 ETHICAL CONSIDERATIONS

#### 12.1.1.A Randomisation

This is a randomised trial therefore neither the participants nor their physicians will be able to choose the participants' treatment. Treatment will be allocated randomly using a computer-based algorithm. This is to ensure that the groups of participants receiving each of the different treatments are as similar as possible.

All participants, with the exception of those allocated to transdermal oestradiol (Arm L), will receive standard hormone treatment. All participants, including those allocated to Arm L, may also receive other standard-of-care (SOC) treatments such as prostate radiotherapy and/or docetaxel, abiraterone, enzalutamide or apalutamide. Use of these SOC treatments will be unaffected by trial participation and is left to the discretion of the treating clinician and participant.

Participants may be randomised to receive additional treatment (metformin) given with standard-of-care treatments, or an alternative form of hormone treatment (transdermal oestradiol). An even allocation ratio is being currently being used which means all eligible participants have an equal chance of being randomised to the control or research arms.

Through the introduction of a "transdermal oestradiol comparison" into the STAMPEDE trial platform, sufficient data will be collected to evaluate this treatment approach more rapidly. By undertaking a meta-analysis using data collected in both PATCH and STAMPEDE trials, fewer participants overall are allocated the control arm i.e. more participants gain access to novel treatments and results will be available sooner.

#### 12.1.1.B Evaluation of Novel Therapeutic Strategies

There is some evidence to suggest that the newer treatment options may have advantages over standard treatment alone with regards to clinical outcome, but this is not confirmed and toxicity may be increased. This trial will follow a large group of people who have been randomly allocated to either the standard treatment(s) or the novel treatment strategies in order to measure the benefits of these approaches. All participants will be followed-up for toxicity and safety issues, so that any benefits can be weighed against any negative aspects, including the impact treatments have on other aspects of medical health e.g. cardiovascular disease, as well as quality-of-life and value for money (health economic analysis).

#### 12.1.1.C Additional Tests and Hospital Visits

Trial participants will have some additional hospital visits and some extra blood samples compared with standard practice, the exact requirements depend on the allocated treatment and stage of disease. Efforts are made to reduce the burden of extra visits and tests, for example extra blood tests can be performed at a time when a blood draw would be performed as part of standard care, or participants can have the blood samples taken at their GP's surgery instead.

#### 12.1.1.D Facilitating Participant Feedback From Investigations and Additional Analyses

For participants who choose to take part in additional sub-studies, biological samples including blood, saliva and remaining stored FFPE tumour samples will be used in research projects. These projects will enable the study of genetic factors and other biomarkers that can help identify individuals who serve to benefit most from the treatments tested in STAMPEDE, and to further understand why and how treatment resistance develops. All samples will remain anonymised and only made accessible to approved collaborators granted access by the STAMPEDE oversight

committees. We will make every effort to protect the confidentiality of this information and make sure personal identities are protected.

From protocol v16.0 onwards, participants may opt to receive feedback regarding genetic results that may arise from the research analyses of genetic material extracted from any of the biological samples collected as part of the trial e.g. saliva, FFPE tumour blocks or circulating tumour DNA extracted from blood. Only results which are of established clinical relevance and for which testing would be available under standard NHS genetic testing guidelines will be fed back. Any genetic analysis undertaken as part of additional research associated with STAMPEDE does not replace clinically indicated investigations as only a proportion of STAMPEDE participants will undergo prospective testing and therefore it cannot be guaranteed that results will be fed back in a timely fashion.

This change has been made in response to emerging data that demonstrates a small proportion of people may have genetic faults in genes such as Breast Cancer Gene 2 (BRCA2). This has implications for both participants and potentially their biological relatives. For participants and their treating clinician, knowledge of this information may facilitate access into further clinical trials and may potentially impact on the choice of treatment following progression.

Any participant who consents to receive feedback and in whom a known pathogenic mutation of clinical significance is detected on testing of research samples collected as part of STAMPEDE will be told of this. Participants will be recommended to undergo genetic counselling accessed via clinical genetics services and consider confirmatory testing. This is necessary to determine if the defect is germline (inherited) and ensures access to appropriate ongoing support. If confirmed as a germline (inherited) abnormality, this will enable biological relatives to also access appropriate genetic counselling and testing if they wish.

The introduction of the “metformin comparison” means that all participants, not known to be diabetic, will be screened for diabetes prior to trial entry. This is to enable the effect of metformin to be studied in non-diabetic participants. All participants in whom screening bloods are abnormal will be referred for confirmatory tests and further management according to local guidelines e.g. via their GP. Screening is expected to lead to a small proportion of potential trial participants receiving a new diagnosis of diabetes but will ensure appropriate management of both conditions.

#### **12.1.1.E Considering the Impact of Emerging Data**

If new information emerges during the course of the trial which may affect the treatment or follow-up of participants all Principal Investigators (PIs) will be informed of this and required to inform trial participants.

#### **12.1.1.F Electronic health records**

Participants are requested to provide consent to permit linkage of trial data to other sources of electronic health data to improve the reliability of long-term follow-up data. Explicit consent is requested for the CTU to store direct identifiers (name and NHS number) securely and separately from anonymised trial data. This is to permit verification of the information held by others and received by the CTU, ensuring that the trial database is only updated with accurate information.

## **12.2 ETHICAL APPROVAL**

The protocol has a Favourable Opinion from an appropriate Research Ethics Committee, according to national guidelines. Additionally, each site must also obtain management permission for research (Local R&D approval or equivalent) from the relevant host organisations before participants can be entered into the trial. The participant’s informed consent to participate in the trial should be

obtained after a full explanation has been given of the treatment options, including the conventional and generally accepted methods of treatment. Participant information sheets and participant consent forms are available on the STAMPEDE website ([www.stampetrial.org](http://www.stampetrial.org)).

The right of the participant to refuse to take part in the trial without giving reasons must be respected. After the participant has entered the trial, the clinician must remain free to give alternative treatment to that specified in the protocol, at any stage, if he feels it to be in the best interest of the participant. However, the reason for doing so should be recorded and the participant will remain within the trial for the purpose of follow-up and data analysis according to the treatment option to which he has been allocated. Similarly, the participant must remain free to withdraw at any time from the protocol treatment without giving reasons and without prejudicing his further treatment.

A statement of MRC policy on ethical considerations in clinical trials of cancer therapy, including the question of informed consent, is available from the MRC Head Office web site (<http://www.mrc.ac.uk>). In addition, the MRC and the Wellcome Trust framework on the feedback of health-related findings in research is readily available (<https://www.mrc.ac.uk/documents/pdf/mrc-wellcome-trust-framework-on-the-feedback-of-health-related-findings-in-researchpdf/>) and has been used when developing the trial specific processes.

## 13 REGULATORY APPROVAL

This trial has been approved in the UK by the MHRA and will be conducted under a Clinical Trials Authorisation CTA 20363/0404/001 in the UK.

The trial has been approved in Switzerland by Swissmedic (Ref: 2009 DR 3235).

### 13.1 DATA COLLECTION & RETENTION

CRFs, clinical notes and administrative documentation should be kept in a secure location (for example, locked filing cabinets in a room with restricted access) and held for 25 years after the end of the trial. During this period, all data should be accessible to the competent or equivalent authorities, the Sponsor, and other delegated authorities with suitable notice as it may be subject to audit or inspection from any of the above.



## 14 INDEMNITY

University College London holds insurance against claims from participants for injury caused by their participation in this clinical trial. Participants may be able to claim compensation if they can prove that UCL has been negligent. However, as this clinical trial is being carried out in a hospital, the hospital continues to have a duty of care to the participant of the clinical trial. University College London does not accept liability for any breach in the hospital's duty of care, or any negligence on the part of hospital employees. This applies whether the hospital is an NHS Trust or otherwise.

Participants may also be able to claim compensation for injury caused by participation in this clinical trial without the need to prove negligence on the part of University College London or another party. Participants who sustain injury and wish to make a claim for compensation should do so in writing in the first instance to the Chief Investigator, who will pass the claim to the managing organisation's Insurers, via the managing organisation's office.

Hospitals selected to participate in this clinical trial must provide clinical negligence insurance cover for harm caused by their employees and a copy of the relevant insurance policy or summary should be provided on request.

## 15 FINANCE

STAMPEDE is funded by Cancer Research UK's Clinical Research Committee (formerly the Clinical Trials Advisory Awards Committee; CTAAC). It is also funded by the MRC through the MRC Clinical Trials Unit at UCL. The trial has National Institute for Health Research Clinical Research Network (NIHR CRN) approval and, therefore, local NCRN funds may be available at each site to support entry of participants into this trial.

Funding arrangements for research arms and sub studies now closed to recruitment can be found in earlier protocols.

**Standard therapies** including **ADT, prostate radiotherapy** and **docetaxel** will be administered as per routine clinical care using local NHS supplies.

**Abiraterone** is manufactured by Janssen Pharma PV (pharmaceutical companies of Johnson & Johnson). They have agreed to provide free drug, funds to distribute drug to participating sites and to help support the conduct and management of the trial.

If abiraterone is required to be given to participants as standard of care, funding will not be provided and the drug should be administered as per routine clinical care using local NHS supplies.

**Enzalutamide** is manufactured by Astellas Pharma. They have agreed to provide free drug and funds to distribute drug to participating sites and to help support the conduct and management of the trial.

If enzalutamide is required to be given to participants as standard of care, funding will not be provided and the drug should be administered as per routine clinical care using local NHS supplies.

**Metformin** will be administered using local NHS supplies.

**Transdermal oestradiol** will be administered as either Progynova TS 100 patches, manufactured by Bayer, or Femseven 100 patches, manufactured by Theramex who have agreed to supply these patches at a trial-specific discounted price. All accredited STAMPEDE sites will be able to order Progynova for use in the STAMPEDE trial through Alliance Healthcare Ltd wholesalers and Femseven patches through AAH Pharmaceuticals Ltd wholesalers.

**Apalutamide** given to participants as standard of care will be administered using local NHS supplies.

## 16 TRIAL COMMITTEES

### 16.1 TRIAL MANAGEMENT GROUP (TMG)

A Trial Management Group (TMG) has been formed comprising: the Chief Investigator; each comparison lead investigator; other co-investigators and members of MRC CTU at UCL internal Trial Management Team. The membership of the TMG may be expanded if other groups of trialists wish to participate. It will also be amended during the trial if other circumstances require e.g. retirement.

The TMG will be responsible for the day-to-day running and management of the trial. The TMG will meet by teleconference at least on a monthly basis where possible and in person as needed.

Further details of TMG functioning are provided in the TMG charter (available on request).

### 16.2 TRIAL STEERING COMMITTEE (TSC)

A Trial Steering Committee (TSC) has been formed to provide overall supervision for the trial and provide advice through its independent chair. The ultimate decision for the continuation of the trial lies with the TSC. The TSC will meet regularly, as required by the trial, and at least annually.

The relationship of the TSC with the other STAMPEDE working groups is detailed in [Figure 7](#). Further details of TSC functioning are provided in the TSC charter (available on request).

### 16.3 INDEPENDENT DATA MONITORING COMMITTEE (IDMC)

An Independent Data Monitoring Committee (IDMC) has been formed. The IDMC will be the only group who sees the confidential, accumulating data to the trial. Reports to the IDMC will be produced by the CTU. The IDMC will meet within 6 months of the trial opening with the frequency of meetings dictated by the IDMC. The IDMC will consider data in accordance with the analysis plan (see [Section 9](#)) and will be advisory to the TSC. The IDMC can recommend premature closure or reporting of the trial, or that recruitment to any research arm is discontinued.

From protocol v8.0 onwards, any recommendation from the IDMC to stop recruitment to one or more trial arms will be acted upon immediately, pending ratification from the TSC. As this period between meetings should be very short, sites would not be notified until after the TSC have made a decision. IDMC recommendations based on emerging safety issues will be discussed with sites promptly.

The relationship of the IDMC with the other STAMPEDE working groups is detailed in [Figure 7](#). Further details of IDMC functioning and the procedures for interim analysis and monitoring are provided in the IDMC charter (available on request).

Data from the “transdermal oestradiol comparison” are viewed by the PATCH IDMC, in meta-analysis with PATCH, rather than by the STAMPEDE IDMC. Recommendations of any actions relating to STAMPEDE would be made to the STAMPEDE TSC.

## 16.4 TMG SUB-GROUPS AND EXPERT PANELS

The trial has a number of TMG sub-groups and expert panels, each comprising of specific members of the TMG, MRC CTU at UCL, field experts and other STAMPEDE clinicians and site staff. The groups are all chaired by TMG members and report directly into the TMG.

- The **Biological Research Group** (BRG), the **Bone and Imaging Group** (BIG) and the **Metabolic Translational Group** (MTG) all input and provide expert oversight of relevant translational aspects of the trial and associated sub-studies.
- The **STRATOSPHERE Consortium Management Group** (STRATOSPHERE: Stratification for Rational Treatment-Oncomarker pairings of STAMPEDE Participants starting long-term Hormone treatment) coordinates the parallel translational programme funded by Prostate Cancer UK.
- The **Comparison Management Groups** (CMGs) were developed to input into the running of each comparison and to propose, plan and develop new comparisons as required. The CMGs are comprised of:
  - Arm G – Abiraterone CMG
  - Arm H – M1|RT CMG
  - Arm J - Abiraterone and Enzalutamide CMG
  - Arm K – Metformin CMG
  - Arm L – tE2 CMG
  - Future proposals CMG
  - Original comparisons CMG
- The **Site Advisory Team** (SAT) includes STAMPEDE site research staff to provide advice to the TMG concerning the running of the trial, including how proposed amendments to the protocol and CRFs directly affect staff practices.
- The **Outcome Review Group** (ORG) conducts cause of death reviews as required for secondary end point analysis.
- The **Clinical Safety Committee** (CSC) review all SAEs of STAMPEDE participants and provide guidance to site clinicians and research staff in regards to clinical safety aspects of the trial.
- The **Genetic Sub-Group** (GSG) provides oversight of all results arising from genetic testing.
- The **Quality of Life** group (QOL group) will advise on how to optimise use of QOL data within the STAMPEDE trial

The relationship of each of these groups with the other STAMPEDE working groups is detailed in [Figure 7](#).

## 16.5 MRC CTU AT UCL INTERNAL GROUPS

CTU requires a number of internal working groups to run a platform protocol. These internal groups assist the TMG in the operation of STAMPEDE, providing guidance on scientific strategies of research and publication, research governance in regulatory information and protocol review and the management of research quality within the STAMPEDE trial.

The relationship of each of these groups with the other STAMPEDE working groups is detailed in [Figure 7](#).

Figure 7: Organigram of the relationships between STAMPEDE working groups

Version 5.0 July 2020

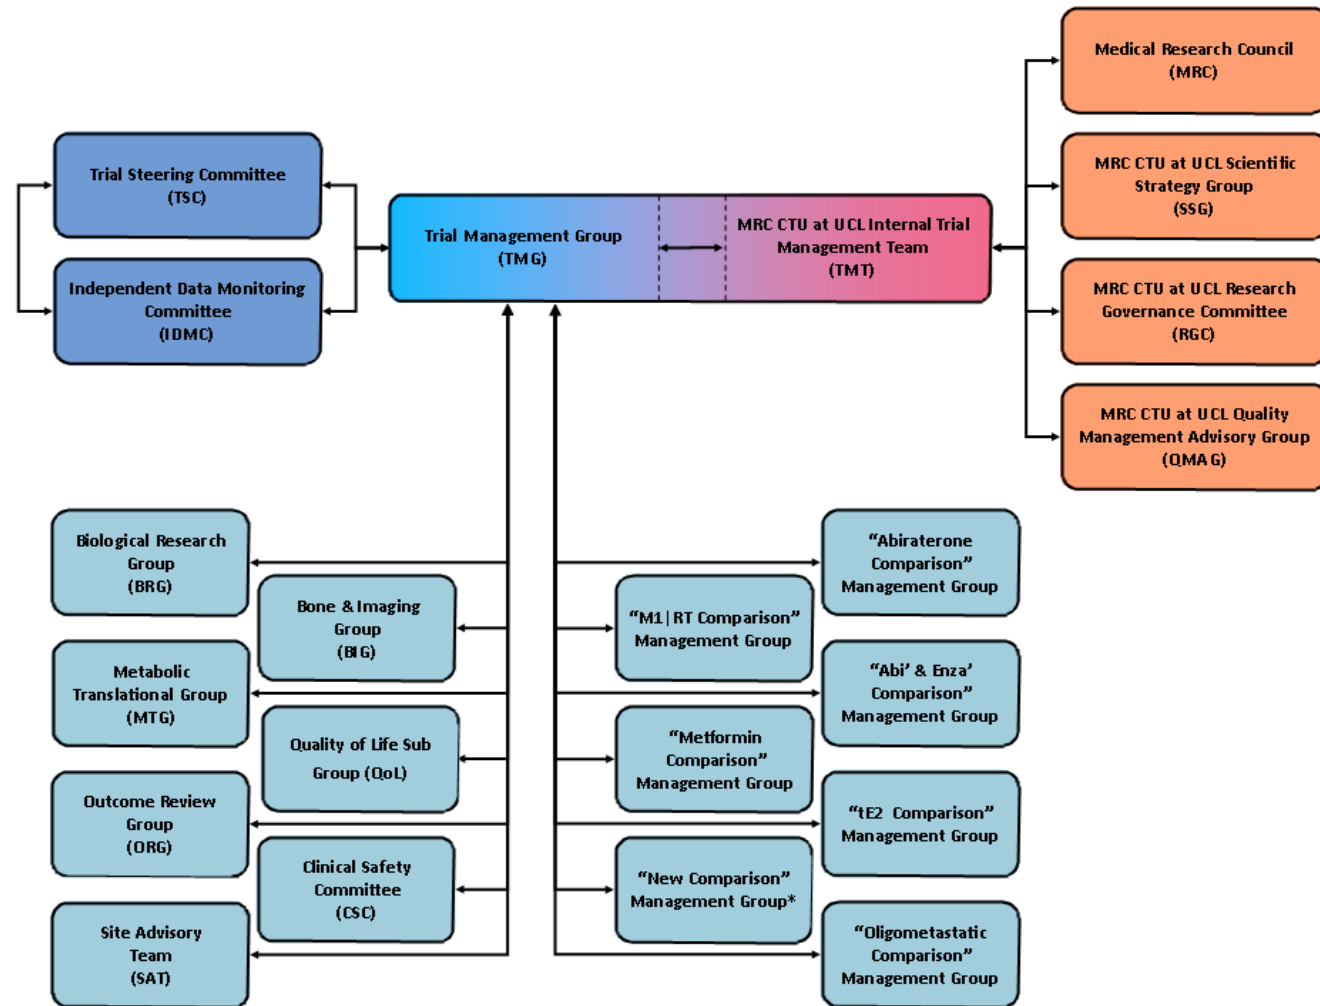

\*The number and timeline of current and planned comparisons will dictate the need for the number of CMGs in operation. At any point there may be one or more.

## 17 ANCILLARY STUDIES

### 17.1 PATIENT REPORTED OUTCOMES

STAMPEDE collects patient reported outcomes in the form of the EORTC QLQ-30 Quality of Life form and the EQ-5D Health Economics Form.

The research nurse should approach participants at appropriate clinical visits to complete a questionnaire. If no clinical visit is scheduled for the participant (with a window of 4 weeks around the expected date) the nurse should organise the completion of the questionnaire e.g. by post or secure e-mail.

Questionnaires should be self-administered; participants should be encouraged to complete the questionnaires without conferring with friends or relatives and all questions should be answered even if the participant feels them to be irrelevant. The research teams should encourage the participants to answer all questions but should not review the responses as these should remain confidential. Copies of questionnaires should not be retained at site.

#### 17.1.1 Quality of life (QL)

The EORTC QLQ-C30 with the prostate-specific module QLQ PR25 will be used. Key items for assessment are pain reduction for participants with metastatic disease and urinary symptoms for participants with locally-advanced disease. In addition, specific hypotheses will be generated for each of the research arms.

##### 17.1.1.A Changes in QL data collection from protocol v19.0 onwards

Initial participation in the QL sub-study was limited to the first 700 participants recruited (this was reached in Sep-2008). After a pause, the QL sub-study re-opened from the implementation of protocol version 8.0 (Nov 2011 onwards).

From protocol v19.0, QL and HE data collection changed, as laid out in [Table 33](#). QL and HE collection stopped for most participants but continued as planned in participants in the “abiraterone comparison” and “abiraterone and enzalutamide comparison” and became lifelong in participants in the “metformin comparison”. HE collection (without QL) also continued in participants in the “M1|RT comparison” randomised after Apr 2016.

[Table 33](#) summarises the participant reported outcome data collection (QL and HE) by comparison. Going forward, for each new comparison within STAMPEDE, a pre-defined sample size for the participant reported outcomes will be described and a sampling approach considered where appropriate.

#### 17.1.2 Health Economics

The EuroQol (EQ-5D) will be used in the study as a generic measure of health-related quality-of-life which can be linked to public preferences. This data will be used to calculate quality-adjusted life-years as part of the economic evaluation. Healthcare resource use will be collected at each follow-up. This includes non-trial inpatient days, non-trial outpatient, GP visits and data on concomitant medications. Information on participants’ use of primary care and community-based services will also be collected as additional questions in the questionnaire. Costs will be calculated on the basis of representative UK unit costs at the point of analysis. A cost-effectiveness analysis will compare all regimens that continue to recruit into their final Efficacy Stage. For further details please refer to [Appendix G](#).

**Table 38: Patient reported outcome data collection by comparison**

| COMPARISON                     | PARTICIPANT DETAILS                                                               | COLLECTION OF PATIENT REPORTED OUTCOMES<br>E.G. EORTC QLQ-C30, EQ-3D                                                                                                                                                                                                            |
|--------------------------------|-----------------------------------------------------------------------------------|---------------------------------------------------------------------------------------------------------------------------------------------------------------------------------------------------------------------------------------------------------------------------------|
| "Original"                     | Arms B, C, D, E, F and Arm A recruited between trial start (2005) and 15-Nov-2011 | No further collection of participant reported outcomes as comparisons have closed to follow-up                                                                                                                                                                                  |
| "Abiraterone"                  | Arms A and G randomised between 15-Nov-2011 and 17-Jan-2014                       | Data collection to continue until disease progression or 5 years post randomisation (i.e. all data collection stops 17-Jan-2019).                                                                                                                                               |
| "Abiraterone and enzalutamide" | Arms A and J randomised between 29-Jul-2014 and 31-March 2016                     | Data collection to continue until disease progression or 5 years post randomisation whichever occurs first.                                                                                                                                                                     |
| "M1 RT"                        | Arms A and H randomised between 22-Jan-2013 and 02-Sep-2016                       | From protocol v19.0 QL and HE data collection will stop for all participants recruited to Arm H prior to April-2016. From protocol v21.0 HE (EQ-5D) data collection will stop along with active follow up for all A and H participants randomised between Apr-2016 to Sep-2016. |
| "Metformin"                    | Arms A and K randomised since 05-Sep-2016                                         | From protocol v19.0 the QL and HE sub-studies are closed to newly randomised participants. For all existing arm A and K participants (i.e. randomised prior to activation of protocol v19.0) data collection continues at each follow-up lifelong.                              |
| "Transdermal oestradiol"       | Arms A and L randomised since 20-Jun-2017                                         | From protocol v19.0 the QL and HE sub-studies are closed to newly randomised participants within this comparison. QL data will be collected through the PATCH trial.                                                                                                            |

## 17.2 TRANSLATIONAL SUB-STUDIES

Samples obtained from consenting STAMPEDE participants are analysed as part of separate translational sub-studies. These are conducted through collaborations with other academic and industry partners. All applications for collaboration and sample access are reviewed by the STAMPEDE oversight committees and overseen by the STAMPEDE BRG. For details on eligibility criteria for each translational sub-study refer to [Section 4.7](#). For details regarding sample collection refer to the [Sample collection and handling manual](#) available via the website.

### 17.2.1 Germline DNA Analysis

DNA is being extracted from saliva samples provided by consenting participants enrolled in STAMPEDE. The purpose of this sub-study is to examine the germline (inherited) genetic changes present in people with high-risk localised or metastatic prostate cancer. The aim is to determine the prevalence of germline genetic aberrations present pre-diagnosis and to correlate prostate cancer risk single-nucleotide-polymorphisms (SNP) genetic profiles, identified in Genome-wide Association Studies (GWAS) and other sequence variants from next generation sequencing (NGS), with duration of response to ADT and the experimental treatments tested in STAMPEDE.

All newly randomised trial participants who join arms A, K or L are eligible to join this sub-study. For details relating to Saliva sample collection and shipping refer to the [Sample collection and handling manual](#).

### 17.2.2 Circulating Tumour-DNA Analysis (Sequential Blood Samples)

The aims of this analysis include identification of molecular subgroups with differential treatment effects and, through sequential sampling, identification of molecular changes associated with disease progression to explore resistance mechanisms and early detection of treatment failure.

Sequential samples are required in order to detect genetic changes within tumours over time. The most important sampling timepoint is at progression, as it is hoped this can inform the potential mechanisms of treatment resistance. The sampling schedule is different for M0 and M1 participants and is detailed in the [Sample collection and handling manual](#).

For details relating to blood sample collection including eligibility criteria and shipping refer to the [Sample collection and handling manual](#).

### 17.2.3 Tissue Sample Analysis (FFPE Blocks)

As the clinical outcome data matures for several of the treatments comparisons evaluated within STAMPEDE, correlative analysis of the archival formalin-fixed paraffin-embedded (FFPE) tumour tissue will be undertaken, aiming to identify if genetic mutations present in prostate cancer cells pre-treatment predict how well each treatment works. In addition, projects providing preliminary prevalence and feasibility data to inform future biomarker-directed randomisations will be conducted.

From 2016 onwards, the CTU has been coordinating the retrieval of archival tumour blocks from selected consenting STAMPEDE participants. These samples are usually stored as FFPE tissue blocks at the hospital where the procedure was performed. Randomising sites will be asked to assist in the retrieval of FFPE samples when these are requested. Research teams will be required to confirm sufficient consent has been provided and to provide an anonymised copy of the relevant consent form. If not done so already, an anonymised copy of the consent form should also be sent to the CTU, as per [Section 10.1.1](#).



For further details on where to check sufficient informed consent, sample processing and shipping and reimbursement, see the [Sample collection and handling manual](#).

#### **17.2.4 Biomarker-Screening Pilot**

A biomarker-screening pilot was conducted in a subset of STAMPEDE sites. This ran from Dec 2017 to Jun 2018 and has now been completed.

#### **17.2.5 Informed consent to receive results arising from genetic sub-studies**

The consent process was updated for participants joining the trial from protocol v16.0 onwards (activated June-2017). Trial participants are asked to provide explicit informed consent if they wish to receive feedback of any results that arise from research analyses of genetic material extracted from any of the biological samples collected as part of the trial e.g. saliva, FFPE tumour blocks or circulating tumour DNA extracted from blood.

Only results which are of established clinical relevance and for which testing would be available under standard NHS genetic testing guidelines will be fed back e.g. pathogenic BRCA2 mutations. Any genetic analysis undertaken as part of additional research associated with STAMPEDE does not replace clinically indicated investigations as only a proportion of STAMPEDE participants will undergo prospective testing. Analyses are conducted on a purely research basis and it cannot be guaranteed that results will be fed back immediately.

STAMPEDE investigators are strongly recommended to refer all participants in whom a clinically relevant genetic result is detected during research analyses to a clinical geneticist. This is to facilitate access to genetic counselling and the required confirmatory testing. This is also necessary in order to offer appropriate advice to biological relatives in the event of confirmatory testing detecting a germline (inherited) abnormality. The list of clinically relevant gene mutations to be fed back will be based on current clinical guidelines. The STAMPEDE Biological Research Group will review this periodically to ensure it remains current and to oversee this process.

Information provided to STAMPEDE participants who joined the trial prior to Protocol version 16.0, stated that any subsequent genetic results would not be linked to them or their families and therefore results will not be provided in this instance. It is possible for trial participants to update their consent by re-consenting to the current Additional Research Consent Form. This should be anonymised and sent to the CTU as per standard procedures, see [Section 10.1.1](#).

### **17.3 DISEASE VOLUMETRIC ANALYSIS SUB-STUDY**

Baseline imaging obtained from STAMPEDE participants are accessed and analysed as part of the trial data collection. Collection and analysis will be undertaken in collaboration with partners on the TMG, initially, in order to determine disease volume. For details partaking to retrospective imaging centralisation and image handling, please refer to the individual sub study Working Practices available from the CTU. All subsequent applications for collaboration and imaging access are reviewed by the STAMPEDE oversight committees following the usual processes.

### **17.4 USING ROUTINE DATA TO IDENTIFY CLINICAL TRIAL OUTCOMES**

This sub-study is developing methods to explore whether routine data can be used to quickly and accurately capture trial-related events in centrally-held datasets. These methods need to be developed and validated using different sources of routine data and to identify different types of events. These data sources include, but are not limited to, data from the Public Health England (PHE) National Cancer Registration and Analysis Service (NCRAS), the National Radiotherapy dataset (RTDS)

and the Systemic Anti-Cancer Therapy dataset (SACT) and NHS Digital, Hospital Episode Statistics (HES), and Office of National Statistics (ONS) data.

The overall aim of this sub-study is to develop a clinically useable tool, to accurately identify disease driven events and trial outcomes, to help reduce the burden of collecting trial data from traditional participant-investigator contact. By using data that has already been accurately collected in patients that have given appropriate consent, or for whom the appropriate permissions are in place (e.g. via the Confidentiality Advisory Group), it may be possible to improve timeliness, reduce costs and save resources. Development of enhanced ways to obtain trial data is being undertaken, to recalculate analyses already carried out but also to perform secondary analyses not possible with conventionally collected trial data. The projected aim is to utilise validated methods for routine follow-up and/or analysis in the future, as outlined in the protocol, longer term outcome data may be sought via routine data sources.

## 17.5 METFORMIN METABOLIC SUBSTUDY

The aim of this project is to explore the heterogeneity of metabolic changes associated with ADT and the effect that metformin has on these changes. Multiple blood markers of metabolic and disease status and sarcopenia assessed by cross-sectional imaging will be examined and linked with baseline characteristics and clinical outcomes.

ADT is standard of care for patients with advanced prostate cancer. It is effective but has side effects, one of them being metabolic dysfunction including obesity, sarcopenia, hyperinsulinemia, and insulin resistance. We will assess whether metformin will alter the percentage of patients with a poor prognostic lipid signature. We will explore whether adding metformin improves oncological outcomes through metabolic reprogramming of the host. In addition we want to determine whether the side effects of ADT can be mitigated by metformin, thus potentially decreasing cardiovascular morbidity and mortality. If we find a decrease in sarcopenia by adding metformin this will also be of importance since sarcopenia does not only affect the self-esteem of men, but also correlates with increased morbidity and mortality.

If metformin is associated with an improvement in metabolic parameters or sarcopenia, it could change clinical standard of care very rapidly, even independently of a benefit in cancer-specific or overall survival.

From protocol v21.0 we will collect sequential blood samples at baseline, regular time points throughout the trial and at progression. In addition we will request CT scans and FFPE tissue blocks from sites. The metabolic sub-study will be for participants allocated to the “metformin comparison”.

For eligibility criteria for the metabolic sub-study refer to [Section 4.7.4](#).

For details relating to blood sample collection and shipping, please request the **Metabolic Sub-study Sample Collection and Handling Manual** from the CTU.

## 18 PATIENT AND PUBLIC INVOLVEMENT

Patient and Public Involvement (PPI) in research is defined by INVOLVE (an advisory group established by the NIHR) as research being carried out 'with' or 'by' members of the public rather than 'to', 'about' or 'for' them. INVOLVE intends 'public' to include patients, potential patients, carers and other users of health and social care services, as well as people from organisations that represent people who use services. In some cases, this may include involvement of a trial's participants in guidance or oversight of a trial.

### 18.1 POTENTIAL IMPACT OF PPI

PPI is in place to have constant patient overview and investment to guide research. Ultimately STAMPEDE has been created to test whether alterations in treatment help to improve outcomes and quality of life of patients. It is essential to have patients' input as they understand what other patients are going through

The nature of STAMPEDE is such that, even after a main analysis of a comparison has been performed, other participants are still being recruited to other arms. We have a duty to participants and the public to disseminate findings and results, both negative and positive. With this in mind, participants are periodically provided with study findings and updates. Study findings are also presented at conferences.

### 18.2 PATIENT REPRESENTATIVES

Patient representatives are actively involved in the management of STAMPEDE including updates and alterations. Part of their role is to review all material that will enter the hands of a patient or family member. This is to ensure all documentation used is clear, concise and has wording that is appropriate for everyone, as well as conveying the intended information. Patient representatives sit on the Trial Management Group (TMG).

## 19 PUBLICATIONS

The results from different sites will be analysed together and published as soon as possible. Individual clinicians must not publish data concerning their participants that are directly relevant to questions posed by the study until the TMG has published its report. The TMG together with the STAMPEDE collaborators will form the basis of the writing committee and decide on the nature of publications.

For the “transdermal oestradiol comparison”, as the efficacy analyses will be based on relevant data from the STAMPEDE and PATCH trials, TMGs for the two studies will form the writing committee. Any release, of efficacy or safety data, presentation or publication will be agreed with the TSC according to the terms of their charter.

All publications will acknowledge the participating sites and clinicians, and these will be detailed in an appendix to the main report. Papers will have named authors determined by the TMG according to the following principles:

- To be as inclusive as possible where this is practicable
- To ensure that there is justification for anyone to be named as an author
- Reasons for nomination for authorship may include: trial design; grant holding; day-to-day trial oversight (TMG membership); analysis; discussion and interpretation of data; representation for key groups; active participation at large recruiting sites.
- It should be accepted that the people qualifying for authorship will vary over time. In addition, key positions will vary depending on the nature of the publication: clinical lead for clinical papers, statistician lead for methodology papers, translational papers may be led by authors not on the main TMG if appropriate (e.g. the bone sub-study). In the event of any dispute related to authorship or data release, the TSC will be responsible for making the executive decision.

In the presentations, this list of sites will also be shown. The term “the STAMPEDE investigators” will clearly be stated and relevant names included in the presentation credits.

A detailed **Publication Plan** is documented separately.

## 20 DATA AND/OR SAMPLE SHARING

Data will be shared according to the CTU's controlled access approach and Standard Operating Procedure, based on the following principles:

- No data should be released in response to a data release request that would compromise an ongoing trial, unless specifically for safety reasons.
- There must be a strong scientific or other legitimate rationale for the data to be used for the requested purpose.
- Investigators who have invested time and effort into developing a trial or study should have a period of exclusivity in which to pursue their aims with the data, before key trial data are made available to other researchers.
- The resources required to process requests should not be under-estimated, particularly successful requests which lead to preparing data for release. Therefore adequate resources must be available in order to comply in a timely manner or at all, and the scientific aims of the study must justify the use of such resources.
- Data exchange complies with Information Governance and Data Security Policies in all of the relevant countries.

Data will be available for sharing on successful request and after the main publication for each comparison. Researchers wishing to access STAMPEDE data should contact the TMG via the CTU team in the first instance. All requests must be reviewed and approved by the TMG and TSC prior to release of data. Investigators should in term ensure the CTU team are regularly updated on the progress of their project and any presentation and publication must be in accordance to the agreements in place.

## 21 PROTOCOL AMENDMENTS

### 21.1 PROTOCOL

#### 21.1.1 Amendments Made To Protocol Version 1.0 (May-2004)

Administrative changes such as typos, word change etc.

Name additions/changes to:

TMG members

TSC members

IDMC members

'General Information' Section – additional information re. Abridged version of protocol

Section 1.2 – Figure 1, Celecoxib duration amended

Section 1.3 – Figure 2, addition of cardiovascular assessment form, name and timings amended

Section 2.3 – Docetaxel information updated

Section 2.4 – Additional text re dose and duration justification for Celecoxib use.

Section 3 – Title change and content updated

Section 4.2 – New exclusion criteria added

Section 4.3.1 – New investigations added and additional text re testosterone measurements and additional text re. prior celecoxib treatment

Section 6.1.4 – Celecoxib duration amended

Section 6.1.5 – Additional text re. Co-administration of docetaxel and bisphosphonates

Section 6.1.6 – Celecoxib duration amended

Section 6.2.2 – additional docetaxel information

Section 6.2.3 – addition of CVS event history

Section 11 – Safety reporting updated

Section 12.1 – Additional text re. the collection of blood for genetic and serum marker studies

Section 15 – Additional information re. Central Subvention for docetaxel arms

#### 21.1.2 Amendments Made To Protocol Version 1.1 (May-2005)

Section 6.2 Administration and Dose Modifications, subsection 6.2.1 Zoledronic Acid

#### 21.1.3 Amendments Made To Protocol Version 2.0 (Jun-2005)

General Information section – SAE reporting fax number and timeframe added.

Section 1.2 – Addition of anti-androgen use for M0 patients as a method of HT

Section 1.2 – Increase in amount of blood needed & addition tissue sample request.

Section 1.3 Trial Documentation updated to include new table detailing trial documentation ahead of accreditation, the inclusion of the radiotherapy forms and correct case report form timings

Section 2.1 – Addition of anti-androgen use for M0 patients as a method of HT

Section 4.1.3 – Inclusion criteria Vii "Normal testosterone prior to hormone treatment" removed.

Section 4.1.3 - ϕnote has been omitted and moved to section 4.2 (see number 8)

Section 4.2 – Exclusion criteria added to exclude patients with active peptic ulceration, gastrointestinal bleeding and inflammatory bowel disease.

Section 4.2 – Exclusion Criteria added to exclude patients with planned major dental work

Section 4.3.1 - All blood test timelines changed from 14 days to 28 days.

Section 4.3.1 – Hormone Therapy pre-randomisation deadline extended from 4 weeks to 12 weeks.

Section 4.3.1 – Additional information regarding the use of NSAIDs and cox-2-inhibitors before coming on to the STAMPEDE study and once commenced on study treatment

Section 4.3.2 – Updated to ask for all vitamins and minerals the patient is taking to be recorded.

Section 4.3.3 – Updated to include the extra blood required and the request for consent of patients' tissue samples.

Section 6.1.1 – Addition of anti-androgen use for M0 patients as a method of HT

Section 6.1.6 – Addition of the calcium & vitamin name "calcichew".

Section 6.6.2 – asking also to collect vitamins and minerals under concomitant medication.

Section 6.6.3 – New section to inform investigators that patient's, who they wish to give radiotherapy to, are also eligible for STAMPEDE

Section 6.6.4 – New section to detail what data is being collected on the radiotherapy given to patients.

Section 7.1; figure 4 – Addition of radiotherapy form and in note, addition of AA alone

Section 7.1.2 – omission of repeated scans and x-rays at 24 weeks, also omitted in note under figure 4.

Chapter 11 – Safety reporting section updated

Section 17.3 – Increase in amount of blood needed & additional tissue sample request.

## **21.1.4 Amendments Made To Protocol Version 3.0 (Jul-2006)**

Front Cover - NCRN logo added for accuracy

Front Cover - Clarification that protocol developed with NCRI rather than on behalf of

Front Cover - Clarification that it is a 6 arm trial

General Information section - MRC CTU staff section updatedyyyy

Section 1.2 – Statistics section updated.

Section 1.2 - Additional research paragraph updated to reflect additional studies and for clarification of terms

Section 1.2 - Blood collection volume changed to reflect new technique used

Section 1.3 (figure 3) - Table showing case report form schedule updated to reflect clarification of follow-up schedule and addition of new CRF (End of Treatment)

Section 2.2 - AS changed to HT (clarification of terms)

Section 2.3 - Updated in information in regard to use of docetaxel added to reflect up to date practice

Section 2.5 - Sub-headings numbered for consistency

Section 3.0 - Information in regard to the Pilot Phase now written in past tense as Pilot Phase has now been completed

Section 4.1.1 - Inclusion criteria extended so that patients who fulfil 2 out of the three of the first inclusion criteria can be eligible.

Section 4.3.1 - Change in time scales by which baseline investigations need to be completed.

Section 4.3.1 - Clarification that chest X-ray is only required if chest is not included in the CT

Section 4.3.1 - Removal of 12 week timeline for baseline PSA test to be performed. (Stipulation that it must be performed before start of HT)

Section 4.3.2 – Information added in regard to time allowed from randomisation to start of treatment

Section 4.3.3 - Additional research paragraph updated to reflect additional studies and for clarification of terms

Section 4.3.3 - Blood collection volume changed to reflect new technique used

Sections 6.1.2-6.1.6 - Androgen Suppression replaced with hormone therapy for consistency of terms

Section 6.2.2 - '(Taxotere)' Removed for consistency

Section 6.2.2 \_ information added in regard to the need to closely monitor liver function prior to docetaxel administration

Section 7.1 - Page number reference updated

Section 7.1.1 - PSA measurement timings updated to accurately reflect follow-up schedule

Section 7.3 (Table 4) - Table and key updated to accurately reflect follow-up schedule and to include information about new CRFs and removal of withdrawal CRF

Section 8 - Rewording for clarification of definition of trial withdrawal

Section 8.1 - Instruction that withdrawal from trial treatment should be recorded on End of Treatment Form rather than withdrawal form

Section 8.1 - Information updated to emphasise that trial treatment must be discontinued following a progression

Section 8.2- Information added in regard to patient transfers

Section 8.3 - Instruction that withdrawal from trial completely must be notified in writing to the MRC CTU rather than included on withdrawal form

Section 9 and Summary – Target event numbers updated to reflect the slightly revised numbers obtained by using –nstage- which is the new, recommended program for MAMS trials

Sections 11.1 and 11.2 - Form numbers removed to allow for future changes in numbering

Section 11.2 – Reference to toxicity grading website added

Section 11.2.1 - Reference to table in appendix G added

Section 12.2 - 'Suggested' removed from 'Suggested patient information sheets'

Section 13 - CTA reference added

Section 17.3 - Information added to reflect new blood collection method for DNA analysis and in regard to additional translational studies for which funding has recently been approved

### **21.1.5 Amendments Made To Protocol Version 4.0 (Dec-2007)**

General Information Section - Randomisation and SAE reporting details sections clarified

Section 1.2 and throughout protocol - Efficacy Stages 1-111 renamed to Activity Stages 1-111 for accuracy and clarity

Section 1.2 - Follow schedule corrected

Section 4.1.2 - Inclusion criteria widened to include high risk relapsing patients, that would not have met the previous PSA based criteria

Section 4.1.3 - Note added to reference location of WHO performance status definitions

Section 4.2 - Notes added to reference locations of toxicity gradings and NYHA classifications

Section 4.3.1 - Timings of baseline scan information changed to accurately reflect most common current practice

Section 6.1.1 - Information about use of LHRH antagonists to ensure that the protocol accurately reflects current and future practice

Section 6.1.1 - Information about suggested duration of hormone therapy added to ensure that the protocol accurately reflects current practice

Section 6.2.2 - Additional information added about the timing of liver function tests prior to docetaxel administration added for clarity

Section 6.6.4 - Information on radiotherapy data collection added

Section 7.1.1 - Erroneous information about the timing of PSA measurements removed

Figure 3 - Moved to new section in protocol for clarity and extended to include current information on data collection

Figure 3b - Added to describe how extent of data collection during follow-up should change, post treatment and post progression

Figure 4 - Notes added to explain the changes in data collected at follow-up and to information that the quality-of-life study will be applicable to the first 700 patients randomised only

Figure 4 - Note added to include palliative radiotherapy CRF

Section 11.3 - SAE reporting information updated

Section 19 - Protocol amendments list updated

### **21.1.6 Amendments Made To Protocol Version 5.0 (Aug-2008)**

1. General Information Section – Randomisation phone line number updated – non UK extension added
2. Section 3 – Information about QL study removed to reflect closure of QL study after first 700 patients
3. Section 4.2 – Exclusion criteria clarified to explain that only patients with severe poor cardiovascular history should be excluded
4. Section 4.3.1 – Information on co-administration of NSAIDS with celecoxib changed based on clinical advice.
5. Section 5 - Randomisation phone line number updated – non UK extension added
6. Section 6.2.1. – Information added to clarify that patients who develop an osteonecrosis of the jaw should stop zoledronic acid treatment
7. Section 6.2.3 – ‘severe’ text added to accurately reflect which patients should be excluded based on their cardiovascular history
8. Section 7.1.2 – Definition of disease progression extended for clarity
9. Figure 3 – Updated to include reference to newly created skeletal related event form



10. Figure 4 – Previous error in table amended to show that the 4th Zoledronic Acid form that is submitted contains information about 3 cycles rather than 2 as previously indicated
11. Table 4 – ‘Other important medical condition’ added to definition of serious in the SAE section, to accurately reflect SAE form and current practice
12. Section 11.1 – Information added on reporting or pregnancies
13. Section 17 - Information about QL study removed to reflect closure of QL study after first 700 patients

### **21.1.7 Amendments Made To Protocol Version 6.0 (Jul-2009)**

1. General Information Section – Trial Pharmacist removed and changes of:

Co-Investigator

Patient Representatives

Trial Manager

Data Manager

General Information Section - Coordinating Centre – address change

General Information Section – change of Sponsor address

Section 1.1 – ratio of patients randomised to the investigational arms updated

Section 1.2 – figure 1b added to clarify trial design from Apr-2011 onwards

Section 1.2 – paragraph added to explain trial changes after the second activity analysis

Section 1.2 – wording added to clarify that QL data only collected for first 700 patients randomised

Section 1.3 – SSA Favourable Opinion removed from list of trial documentation required ahead of site accreditation

Section 2.1 – Amount of people diagnosed with prostate cancer annually updated

Section 2.4 – note added to explain completion of recruitment to celecoxib- containing arms

Section 2.5.2 - note added to explain completion of recruitment to celecoxib- containing arms

Section 3 – SSA Favourable Opinion removed

Section 4.2 – Exclusion criterion xiii greyed out

Section 4.3.1 – paragraph removed regarding potential randomisation to celecoxib-containing arms

Section 5 – Randomisation instructions expanded to exclude public holidays or dates when notice has been given by the CTU

Section 6.1.4 – formatting changed to grey font to reflect recruitment completion for arm D

Section 6.1.6 - formatting changed to grey font to reflect recruitment completion for arm F

Section 6.2.3 – recruitment note added

Section 6.6.3 – radiotherapy statement changed to reflect data from recent trials

Section 7.1.2 – removal of reference to SRE- specific CRF

Section 7.3 – Figure 3 - Addition of Bone Density Risk Factor Form and BMD sub-study assessment forms to summary of timing table

Section 7.3 – Figure 4 – Weeks added to timings of assessments post 2 years

Section 7.3- Figure 4 – note added to explain recruitment completion for arms D and F

Section 12.1 – Wording changed to reflect change to randomisation allocation ratio

Section 12.1 – Addition of statement regarding new information emerging during the trial

Section 12.2 – Reference to SSA removed

Section 16.3 – Statement added regarding actioning IDMC recommendation ahead of TSC ratification

### **21.1.8 Amendments Made To Protocol Version 7.0 (Jul--2011)**

1. General Information Section- SAE reporting fax number corrected
2. Section 11- SAE reporting fax number corrected

## 21.1.9 Amendments Made To Protocol Version 7.1 (Jul-2011)

Throughout protocol – numbering has been updated in some sections new accommodate new information that has been added.

General Information Section – contact details updated

General Information Section – Funding information updated to include involvement from additional company

General Information Section – Wording on compliance and regulations updated to reflect current MRC CTU standard wording

General Information Section – Abbreviations list updated

Section 1.1 – The number of investigational agents being studied updated from three to four

Section 1.1 – Information regarding celecoxib updated to reflect that recruitment to these arms was discontinued in Apr-2011

Section 1.1 – Information about new IMP, Abiraterone inserted

Section 1.1 – Sample size and trial duration information updated to reflect changes brought about by additional trial arm

Section 1.2 – Summary information updated to reflect the discontinuation of recruitment to celecoxib arms and the addition of abiraterone

Figures 1a, b and c - Updated to reflect the discontinuation of recruitment to celecoxib arms and the addition of abiraterone

Section 1.2 – Information on trial stages updated to reflect changes brought about by additional trial arm

Section 1.2 – Information updated regarding the re-opening of the quality-of-life sub-study from implementation of protocol version 8.0

Section 2.1 – Wording related to hormone therapy updated for clarity

Section 2.1 - Updated to reflect the discontinuation of recruitment to celecoxib arms and the addition of abiraterone

Section 2.2 – Updated references added

Section 2.3 – Updated references added

Section 2.5 – Section added to give background information on new IMP, abiraterone

Section 2.6.1 – Updated references added

Section 2.7 – Section added to give information regarding radiotherapy which is to be given as part of standard care following recently published trial data.

Section 3 – Wording updated regarding selection of investigators to reflect current MRC CTU practice

Section 4.1 – Inclusion criteria updated with new criterion regarding radiotherapy use

Section 4.1 - Inclusion criteria updated with new criterion regarding contraceptive use

Section 4.1 – Wording of inclusion and exclusion criteria updated for clarity

Section 4.1 – Exclusion criteria updated with new criterion regarding acceptable liver function for trial entry

Section 4.1 – Exclusion criteria updated with specifics related to blood pressure levels

Section 4.1 - Exclusion criteria updated with new criterion regarding concomitant medications

Section 4.1 - Exclusion criteria updated with new criterion regarding prior treatment with abiraterone

Section 4.1 - Exclusion criteria updated with new criterion regarding prior treatment with chemotherapy

Section 4.1 - Exclusion criteria updated with new criterion regarding prior treatment with zoledronic acid

Section 4.3 – Wording updated to reflect that patients who initially fail screening can be re-screened at a later date

Section 4.3.2 – Wording updated regarding prior anti-androgen and LHRH use updated for clarity

Section 5.1 – Co-enrolment guidelines information updated to describe newly created co-enrolment CRF

Section 6.1 – Trial treatment information updated to reflect the fact that anti-androgens alone will be no longer permitted as hormone therapy

Section 6.1.1 – Updated to describe patients for whom radiotherapy should be given as standard practice

Section 6.1.1 a and b - Sections added to give information regarding radiotherapy treatment

Section 6.1.1-6.1.6 – References to further sections updated

Section 6.1.7 – Section added to describe abiraterone treatment

Section 6.2.4 - Section added to describe abiraterone treatment

Section 6.6 - Section added to give information regarding radiotherapy treatment

Section 7.1.1 – Reference to blood being taken at patient's home removed as this does not occur in practice

Section 7.1.2 – Wording updated regarding the reporting of biochemical failures for clarity

Section 7.1.2 – Wording updated regarding skeletal-related events for clarity

Section 7.1.3 – Section added to describe additional assessments required related to abiraterone treatment

Section 7.1.4 – Section added to provide information on when treatment should commence

Figure 4 – Updated for clarity regarding return of BMD sub-study forms, the addition the co-enrolment CRF and the description of the re-opening of the QL Sub-study.

Figure 5 – Updated with reference to abiraterone and co-enrolment form

Section 7.3 - Wording on trial closure updated to reflect current MRC CTU standard wording

Section 8.1 – Additional criteria for definition of progression added for clarity

Section 8.1 – Definition of progression for abiraterone patients added.

Section 9 – Statistical information updated to describe the addition of the new trial arm

Section 11 – Safety reporting wording updated for clarity

Section 11 – SAE reporting fax number updated

Section 12 – Ethical information updated to describe the unequal randomisation allocation ratio

Section 12 – Ethical information updated to describe that the visit schedule will vary according to trial arm

Section 12.2 – Wording updated to reflect international participation in the trial

Section 13 – Wording updated to reflect international participation in the trial

Section 14 – Wording updated to reflect international participation in the trial

Section 15 - Updated to reflect the discontinuation of recruitment to celecoxib arms and the addition of abiraterone

Section 16 – Reference to trial committee charters added for information

Section 17.1 – Information added to reflect re-opening of quality-of-life sub-study

Section 17.2 – Timing of health economics analysis updated to previous error

Section 18 – Information on publication policy expanded for clarity

Section 19 – Information regarding amendments to protocol appendices moved to the separate appendices document

Section 20 – References extensively updated

### **21.1.10 Amendments Made To Protocol Version 8.0 (Sep-2011)**

Throughout protocol – numbering, sections headings, tables, figures and bibliographical references have been updated in some sections to accommodate new information that has been added

Throughout protocol – Androgen Deprivation Therapy has replaced Hormone Therapy as deemed more representative of the type of hormone therapy used in the study

General Information Section – New staff members of the MRC CTU and Co-Investigators added and contact details updated

General Information Section – Abbreviations list updated

Section 1.1 – Information regarding the new research radiotherapy treatment inserted

Section 1.1 – Information regarding docetaxel updated

Section 1.2 – Wording updated to reflect the addition of the new research comparison arm

Section 1.3 – Additional criteria for the re-accreditation of participating centres (for protocol version 9.0 only)

Section 2.1.1 – Wording updated to clarify the use of anti-androgen in trial patients

Section 2.1.2 – Information added to describe the rationale for the RT comparison arm

Section 2.8 – Information added to describe research RT treatment to prostate for patients with newly diagnosed metastatic disease

Section 3.1 – Information added to describe RT Quality Assurance procedures and centre accreditation

Section 4.1.1 to 4.1.3 – Wording updated to clarify inclusion criteria for all patients groups (newly diagnosed non-metastatic, metastatic and relapsing patients)

Section 4.2 – Clarification added on cardiovascular exclusion criteria

Section 4.2 – New exclusion criterion added concerning patients with prior exposure to hormone therapy

Section 4.2 – New exclusion criterion added to reflect the addition of the new RT comparison arm

Section 4.4.1 – Clarification added regarding pre-randomisation checks

Section 4.4.2 – Clarification added regarding permissible hormone therapy duration prior to randomisation

Section 4.4.5 – Information added regarding starting research radiotherapy treatment

Section 4.4.6 – Information updated on concomitant medications

Section 5 – Clarification regarding randomisation allocation added to reflect the addition of the new RT research arm

Section 6.1.8 – Information added to describe the administration of research radiotherapy

Section 6.2.1 – Clarification added regarding the measurement of serum creatinine levels prior to the administration of zoledronic acid

Section 6.2.3 – Clarification regarding the completion of recruitment to the celecoxib containing arms

Section 6.25 – Information added regarding the administration of research radiotherapy treatment

Section 6.6 – Clarification incorporated to describe the administration of standard-of-care radiotherapy

Section 7.1.4 – Information added regarding data collection and non-administration of standard radiotherapy

Section 7.2 – Section updated to include new treatment specific CRFs and timing of CRFs

Section 8.1 – Clarification added for the criteria to stop treatment for patients randomised to arm G

Section 8.2 – Section expanded to include additional details on study patient transfer to different centres

Section 8.3 – Additional sentence inserted to reinforce the importance of compliance with follow-up assessments

Section 9.1 – Additional paragraph inserted to clarify the method of randomisation and allocation distribution in the light of the introduction of the new RT arm

Section 9.4 – Wording updated to clarify the assessment of safety data

Section 9.5.4 – Wording updated concerning the end of randomisations to arm G

Section 9.6 to 9.6.4 – Section added describing sample size issues and trial stages for arm H

Section 9.8 – Clarification on intermediate stopping guidelines

Section 9.9 – Clarification on the outline analysis plan

Section 11 – Information on safety reporting updated to reflect the addition of the research RT comparison arm

Section 11 – Clarification added regarding arm A safety reporting timelines

Section 12.1 – Clarification added regarding the Principal Investigator’s responsibilities

Section 14 – Indemnity section updated to reflect current MRC policy

Section 16 – Clarification regarding TMG membership

Section 17.3 – Section on Bone Mineral Density sub-study removed

Section 19 – Information regarding amendments to protocol appendices moved to the separate appendices document

Section 20 – References updated

### **21.1.11 Amendments Made To Protocol Version 9.0 (Oct-2012)**

Throughout protocol – numbering, sections headings, tables, figures and bibliographical references have been updated in some sections to accommodate the completion of recruitment to original research arms B, C and E.

Throughout protocol – Tenses have been changed to reflect activities that were in the future and which have now been passed.

Section 1 – Figure added and clarifications added to each figure

Section 2 – Previous reference 8 removed

Section 4 – Clarification of acceptable alternatives to bone scans

Section 6.2.5 – Correction of an error defining the PTV: the wording has been reordered

Table 4 – Dose-volume objectives corrected: order swapped

Table 5- Correction CRFs names

Section 17.3.2 – Clarification that DNA may be extracted

### **21.1.12 Amendments Made To Protocol Version 10.0 (Apr-2013)**

Throughout protocol – numbering, sections headings, tables, figures and bibliographical references have been updated in some sections

Throughout protocol – typos have been corrected

Section 4 – Clarification of exclusion criteria V (now V and VI)

Section 6 – Timing of orchidectomy prior to randomisation extended to 12 weeks

Section 6 – Clarification of hypokalaemia, blood pressure and fluid retention management

Section 9 – Statistical considerations amended in light of the recruitment extension for the abiraterone comparison

Section 14 - Section updated to reflect the changes in the structure of the MRC CTU (now MRC CTU at UCL) and indemnity arrangements

### **21.1.13 Amendments Made To Protocol Version 11.0 (Sep-2013)**

Throughout protocol – numbering, sections headings, tables, figures and bibliographical references have been updated in some sections

Throughout protocol – typos have been corrected

Co-investigators list updated to reflect the addition of the “enzalutamide + abiraterone comparison” lead

Section 1.2 – Enzalutamide added as trial treatment

Section 1.2 – Protocol version 12.0 added to the list of amendments

Section 2.10 – Rationale for the combination of enzalutamide and abiraterone

Section 4.2 – Eligibility criteria amended to reflect the addition of enzalutamide + abiraterone arm

Section 4.4.2 – Wording clarified

Section 6.8 – Clarification regarding end of trial treatment after starting trial therapy

Section 6.10 – Section added to describe enzalutamide and abiraterone treatment for the new research arm (Arm J)

Section 6.11.4.A – Section added to describe the management of toxicities from trial abiraterone

Section 6.11.4.B - Section added to describe the management of toxicities from trial enzalutamide

Section 9.1.4 – Section added to describe the statistical considerations concerning the introduction of Arm J

Section 9.3 – Principles and assumption for the introduction of Arm J added

Section 9.7 and sub-sections – Sample size issues and trial stages for Arm J

Section 9.9 – Details on interim monitoring and analyses for Arm J added

Section 11.2.1.D – Wording clarified regarding safety reporting requirements for control arm

Section 12.1 – Wording clarified

Section 15 – Details on funding for the “enzalutamide + abiraterone comparison” added

Section 19 - Amendments made to protocol updated

Reference list updated

### **21.1.14 Amendments Made To Protocol Version 12.0 (Jan-2014)**

Throughout protocol – typos have been corrected

Section 4.4.2. Wording clarified

Section 4.3. Wording clarified for eligibility to M1|RT comparison

Section 6.10. Addition of use of dexamethasone post-biochemical progression for Arm J patients

Section 6.11.4.A. Correction of CTCAE version

Section 6.11.4.C. Clarification on enzalutamide dose modification to be in line with current SmPC

Section 9.6. Sample size increase for M1|RT comparison

Section 11. Correction of safety reporting timelines for Arm A patients

Section 17. Addition of saliva samples collection for DNA analysis

Table 4, 5 and 6. Clarification on Case Report Forms and Follow-up schedule

### **21.1.15 Amendments Made To Protocol Version 13.0 (Feb-2015)**

Throughout protocol – typos have been corrected

Throughout protocol – clarification on the new definition of standard-of-care

Table of contents updated to reflect any changes to the protocol

Section 1.1. Wording added throughout section to include reference to survival results from “original comparisons”

Section 2.1.1. Section improved to include reference to survival results from “original research comparisons”

Section 2.1.2. Section improved to include reference to survival results from “original research comparisons”.

Section 2.1.3. Additional section added to describe the role of docetaxel for people with M0 or M1 disease

Section 2.9. Clarification on treatment completion and primary results for “original research comparisons”

Section 4.2. Clarification of Exclusion criteria XIII and XVI

Section 4.4.2. Clarification on HT prior to randomisation

Section 4.4.3. New section to clarify standard-of-care docetaxel treatment prior to randomisation

Section 4.4.7. Clarification on concomitant medication and contra-indicated concomitant medications

Section 4.5. Clarification provided on tissue block collection

Section 6. Inclusion of docetaxel into the standard-of-care

Section 6.2.3 New section to describe standard-of-care docetaxel administration

Section 6.11. Improvement throughout sections and sub-sections for abiraterone and enzalutamide-related toxicity management

Section 6.12. Section improved throughout to incorporate clearer details on concomitant medications and drug-to-drug interactions

Section 7.1.4. New section to describe data collection for standard-of-care docetaxel

Section 9.7.4. Clarification provided about implications for “enzalutamide+ abiraterone comparison” following change of standard-of-care treatment

Section 11.2.1.D Clarification on SAE notification timelines to reflect change in standard-of-care treatments (addition of docetaxel)

Figure 1. Figure updated to reflect change in standard-of-care

Figure 2. Figure updated to reflect trial history and recruitment over time

Figure 3. Figure updated to reflect changes in standard-of-care and recruiting arms

Table 1. Table updated to remove repetition

Table 13. Table updated to include new CRF to report standard-of-care docetaxel treatment

Table 15. Table updated to include only active trial treatments

## **21.1.16 Amendments Made To Protocol Version 14.0 (Oct-2015)**

Throughout protocol – typos have been corrected

Throughout protocol – clarification on the new definition of standard-of-care

Table of contents updated to reflect any changes to the protocol

Section 1. Wording added throughout section to include reference “metformin comparison”

Section 2. Section updated to include reference “metformin comparison”

Section 4.2. Exclusion criteria review to reflect Arm J closure and instruction of “metformin comparison”

Section 4.3. Clarification of comparison specific eligibility (M1|RT and metformin)

Section 4.5.7. Clarification on concomitant medication and contra-indicated concomitant medications

Section 6. Treatment sections improved throughout

Section 6.11. Section updated to include details on metformin treatment

Section 6.12. Amendment throughout sections and sub-sections for metformin treatment

Section 6.13. Amendment throughout sections and sub-sections for metformin treatment

Section 6.13. Improvement throughout sections and sub-sections for abiraterone and enzalutamide treatment

Section 7.0. Amendment throughout sections and sub-sections to include assessment and procedures specific to “metformin comparison”

Section 9.0. Section updated and streamlined to capture statistical considerations on each comparison

Section 9.0. Details on “metformin comparison” added

Section 11. Safety processes updated and clarified

Section 16.0 Membership to oversight groups updated

Section 11.2.1.D Clarification on SAE notification timelines to reflect change in standard-of-care treatments (addition of docetaxel)

### **21.1.17 Amendments Made To Protocol Version 15.0 (Mar-2017)**

Throughout protocol – re-structure of the treatment-related information for ease of use

Throughout protocol – clarification on the definition of standard-of-care

Throughout protocol – typos have been corrected

Addition of TMG members

Table of contents updated to reflect any changes to the protocol

New section for summary of trial added in table format

Section 1. Revised format for the summary of treatment groups, with the new transdermal oestradiol arm also added

Section 2. Clarification regarding research treatments that have previously reported or completed recruitment, section updated to include the “transdermal oestradiol comparison”

Section 3. New sections added for the “transdermal oestradiol comparison” and future planned biomarker-selected comparisons

Section 4.1.4. Change in definition of adequate renal function

Section 4.3. New section added for the biomarker screening pilot, selection criteria removed for “research RT comparison”

Section 4.4.1. Change in definition of adequate renal function

Section 4.4.2. New section added for the patient selection criteria specific to the “transdermal oestradiol comparison”

Section 4.5. Screening procedure tables and figure added for clarification.

Section 4.5.1. New section added for biomarker screening pilot investigations prior to randomisation.

Section 5.1.1. New section added for the biomarker screening pilot registration.

Section 6. New sections added for the “transdermal oestradiol comparison”

Section 7. Amendment throughout sections and sub-sections to include assessment and procedures specific to “transdermal oestradiol comparison”

Section 7.1.4.B. Section added on cardiovascular outcomes for the “transdermal oestradiol comparison”

Table 18. Table added to clarify follow-up assessments

Section 8. Section updated for “transdermal oestradiol comparison”

Section 9. Section updated for “transdermal oestradiol comparison”

Section 12.1.1.D. Section added on participant feedback from investigations and additional analyses

Section 15. Section updated for “transdermal oestradiol comparison” and biomarker screening pilot

### **21.1.18 Amendments Made To Protocol Version 16.0 (Oct-2017)**

Summary of trial- Table 1: Schedule of Assessments has been added

Abbreviations & Glossary- new terms have been added

Section 1- Table 4: Abiraterone information updated as results of primary analysis published

Section 4.3 - Biomarker timelines redefined, the length of prior hormone therapy has increased to reflect change in turnaround time for testing

Section 4.6 - Biomarker screening information updated

Section 6.2 – Clarification on safety monitoring required for patients receiving trial abiraterone added . Abiraterone overdose information altered for clarity.

Section 6.3.4 - Drug interactions updated to specify that tamoxifen is contraindicated in combination with abiraterone, enzalutamide and transdermal oestradiol.

Section 6.5 – Detail on requirements at site to demonstrate compliance with per-protocol required safety monitoring added

Section 7 – Schedule for assessments updated, removal of table 19

Section 7.1 - Clarification on additional safety monitoring required for patients receiving trial abiraterone added

Section 7.4 - Table 20 QL information removed and added to Table 1: Schedule for Assessments

Section 10.1.1- Central monitoring of consent information added

Section 11 – Re-structured and re-worded for clarity on reporting requirements for safety data captured on the SAE CRF. Explanation provided for exempted events and definitions added. Table 28 and Box 1 updated and Figure 1 added.

Section 11.2- Updated SAE exceptions, SAE flow chart added for clarity

Section 11.3 - Update of investigator assessments and notification checklist for expedited safety reporting

Section 11.4 - Update of wording of CTU responsibilities

Section 17.4 - Sub-study information added to include Disease Volumetric sub-study

## **21.1.19 Amendments Made To Protocol Version 17.0 (Feb-2017)**

Throughout protocol - Typos have been corrected, abbreviations & glossary & table of contents updated

Throughout protocol - Addition of abiraterone as SOC & original comparisons closed to active follow-up

Throughout protocol – Update of and removal of biomarker pilot information now randomisation to the rucaparib comparison is to be activated

Trial administration – Information updated, full contact list linked to website, all comparison chief-investigators added as co-signatories

Summary of trial – Updated, “rucaparib comparison” added and “original comparisons” closed to active follow-up; figure 1 updated with new randomisation schema and S-STAMPEDE Cohort study

Schedule of Assessments updated– Table 1a removed, Tables 1, 2 and 3 added

Lay Summary – Re-drafted, “rucaparib comparison” added

Section 2 – Role of SOC abiraterone added, reported comparisons updated and rationale for comparisons that have completed recruitment removed. Rationale for the “rucaparib comparison” added

Section 3.1 – Addition of site and investigator criteria

Section 4 – Complete restructuring of section, addition of biomarker screening and registration information.

Section 4.2 – Additional information about proposed approach to staged informed consent

Section 4.4 – Clarification as to required pre-randomisation screening by comparison

Section 4.5.4 – Detail regarding SOC abiraterone (permitted in metformin comparison only)

Section 4.9.3 – Eligibility to be randomised to the “rucaparib comparison” added

Section 4.10 - Sub-study eligibility criteria clarified; new germline blood sub-study added (PAXgene for S1A and S1M) and stratified – STAMPEDE cohort study added

Section 5 – additional information relating to registration and randomisation to the “rucaparib comparison” added

Section 6.1.4- SOC abiraterone detail added

Section 6.2.7.C – Table 19: Additional assessments required following change of transdermal oestradiol patch or dose added

Section 6.2.9 - Rucaparib treatment specific information added

6.3 – Concomitant medications updated: clarification that spironolactone is contraindicated with abiraterone and rucaparib drug interactions added

Section 7.1 – Table 27: summary of follow-up schedules by participant group added

Section 7.1.5.D – Additional Safety assessment required for participants receiving rucaparib added

Section 7.2.3 – Data collection for SOC abiraterone clarified

Section 7.2.8 & 7.3.2 - Data collection & Follow-up procedures for S-STAMPEDE Cohort participants described

Section 7.3.3 – Clarification added regarding procedures to use linked follow-up information obtained from sources of electronic health data

Table 29 and 28 updated with new CRFs

Section 8.1.4 – Reasons to stop rucaparib

Section 9.8 – addition of statistical considerations relating to the “rucaparib comparison”

Section 11 – Stopping of SARs and SUSARs reporting for “original comparisons” closed to active follow up and addition of rucaparib-specific notable events

Section 12- ethical considerations updated with detail relating to data to permit linkage with sources of electronic health data

Section 13 – Data archiving and retention guidance added

Section 16 – Updates of STAMPEDE oversight committees including expanded TMG sub-groups



Section 17.1.1 A- Closure of HE & QL sub-studies to new participants and stopping of data collection for several comparisons; summarised in Table 40.

Section 17.2 – S-STAMPEDE cohort study & additional germline data collection added

Section 17.4 – New sub-study: Using routine data to identify clinical trial outcomes added

Section 18 – New section regarding patient and public involvement in STAMPEDE added

Section 20 - New section regarding data and sample sharing added

## **21.1.20 Amendments made to Protocol Version 18.0 (Jun-2018)**

Throughout protocol: Removal of “rucaparib comparison” information

Throughout protocol: Redraft of biomarker screening pilot study into ancillary studies section

Summary of Trial – Figure 1 updated; removal of registration information for S-STAMPEDE Cohort study

Schedule of Assessments – Removal of registration from figure 1; Table 2 updated to include PSA within 8 weeks of randomisation; Table 3 S-STAMPEDE Schedule of Assessments removed

Abbreviations & Glossary - Terms relating to the “rucaparib comparison” have been deleted

Section 1 – Lay summary “rucaparib comparison” information removed

Section 2 – Rationale for incorporating molecular stratification and “rucaparib comparison” removed

Section 3.2 – “Rucaparib comparison” comparison-specific site accreditation removed

Section 4 – Removal of biomarker screening and registration information

Section 4.2 – Removal of staged informed consent process

Section 4.3 – Removal of biomarker screening eligibility information

Section 4.4.3 – Removal of “rucaparib comparison” screening investigations prior to randomisation

Section 4.5 – Removal of prior permitted SOC treatments for “rucaparib comparison”

Section 4.7 – Removal of and clarification to the general inclusion & exclusion criteria of Serum Pottasium & Cardiovascular disease respectively.

Section 4.9.3 – Removal of “rucaparib comparison” specific eligibility criteria

Section 4.10 – Addition of information regarding biomarker pilot screening

Section 4.10.1 – Removal of S-STAMPEDE Cohort sub-study

Section 4.10.2 – Removal of PAXgene sample collection

Section 5 – Removal of information relating to registration and randomisation to the “rucaparib comparison”

Section 6.2.6.B – Addition of additional metformin dose reduction stages

Section 6.2.9 – Removal of “rucaparib comparison” research treatment information

Section 6.3.1 – Removal of “rucaparib comparison” therapeutic interactions information

Section 7 - Table 30 removal of “rucaparib comparison” specific CRFs; table 31 – removal of arm S1M schedule for completion of treatment forms

Section 7.1.5.D – Removal of rucaparib additional safety assessments

Section 7.2.8 – Removal of data collection for S-STAMPEDE Cohort participants

Section 7.3.2 – Removal of follow-up for S-STAMPEDE cohort participants

Section 8.1.1 – Clarification of metformin, abiraterone and enzalutamide use post progression

Section 8.1.4 – Removal of “rucaparib comparison” stopping trial treatment information

Section 9.6.7 – Revised sample size for “metformin comparison”

Section 9.8 – Removal of statistical consideration relating to the “rucaparib comparisons”

Section 10.1.1 – Updated central monitoring of consent process

Section 11 – Removal of rucaparib-specific notable events

Section 11.1.1 – Clarification of trial-specific exemptions and notable adverse events

Section 16 – Addition of Genetic Sub-Group

Section 17.1.1.A – Clarification of Quality of Life and Health Economics data collection

Section 17.2 – Details of biomarker screening pilot study information moved here

Section 17.2.1 – removal of S-STAMPEDE Cohort study information

## **21.1.21 Amendments made to Protocol Version 19.0 (Aug-2020)**

Throughout protocol: Section headings and table numbers renumbered, references updated, Centre changed to Site for consistency

General information - Sponsor updated to UCL, Trial contacts updated, Glossary updated

Summary of Trial – M1RT status updated, transdermal oestradiol number of participants updated

Figure 1 updated to include new SOC options and clarify options based on HbA1c level.

Figure 2 updated to reflect extended recruitment in metformin and te2 comparisons

Schedule of Assessments –remove height and update footnotes

Abbreviations – minor updates

Section 1 – updated comparisons closed to recruitment – addition of Arm H. Arms E and F added to Table 6.

Section 2.1.3 – Addition of new SOC options abiraterone, enzalutamide and apalutamide

Section 2.3 – Addition of M1RT results

Section 2.5.2.B – Updated target recruitment for “transdermal oestradiol” comparison

Section 3.1.2 – Addition to recommend additional investigators be delegated for safety reporting to cover absences

Section 4.2 – Minor rewording clarification

Section 4.1 – Update to screening investigations, addition of timeframes in days, M1 imaging clarified, several baseline investigations moved to pre-randomisation. ECG removed, option for no fasting glucose added.

Section 4.3 – Table 8 - Addition of new SOC options abiraterone, enzalutamide and apalutamide

Section 4.3.2 – Added oligometastatic disease

Section 4.3.3 –Clarification SOC docetaxel cannot be given if SOC abiraterone, enzalutamide and apalutamide is planned

Section 4.3.4 – New section for SOC abiraterone, enzalutamide and apalutamide. Addition of enhanced monitoring for “transdermal oestradiol” comparison

Section 4.4.4 – General inclusion criteria III removed, haematological value thresholds clarified

Section 4.5 – General exclusion criteria II added (consolidates previous VII-IX), clarification where both AST and ALT results required, VI clarified exclusion is for unhealed surgical wounds rather than surgical intervention

Section 4.6.1 – Added metabolic substudy to “metformin” comparison requirements

Section 4.6.2 – Added eligibility criteria for participants not yet started on SOC abiraterone, enzalutamide and apalutamide

Section 4.7.2 – Clarification circulating tumour DNA sub study not recruiting

Section 4.7.4 – New section for Eligibility for metformin sub study

Section 5.1 – Addition of new instruction to provide randomisation documents to CTU after randomisation.

Section 5.2 – Clarification of wording for co-enrolment in other trials (interventional and non-interventional)

Section 6 – Reformatted throughout, new subheadings and layout, multiple new tables inserted

Section 6.1 –Addition of SOC combination table to replace text list

Section 6.1.1 – Section renamed Androgen Deprivation Therapy (previously Hormone Therapy)

Section 6.1.2 – Updated wording on Radiotherapy for M0 participants

Section 6.1.2.C – New section for oligometastatic participants

Section 6.1.3 – Administration of SOC RT moved up from 6.7

Section 6.1.5 – New title SOC upfront systemic therapy – addition of SOC abiraterone, enzalutamide and apalutamide

Section 6.2 –Research treatment broken down per IMP instead of per comparison.

Section 6.2.1 – Addition of Table 9 treatment duration for all research treatments and Table 10 management of trial treatment post progression

Section 6.2.2 – Some text now in tables. Updated wording about associated toxicities and contraindications

Section 6.2.3 – Some text now in tables. Updated wording about associated toxicities and contraindications

Section 6.2.3.C – New table for hypertension monitoring.

Section 6.2.4 - Some text now in tables. Updated wording about associated toxicities and contraindications

Section 6.2.5 - Reformatted, some text now in tables. Updated wording about associated toxicities and contraindications. Additional detail on moving from induction to maintenance dose on oestradiol level, and changing brands of patches

Section 6.3 – Clarification of wording. Details of drug interactions and additional safety monitoring moved up to sections 6.2.2, 6.2.3, 6.2.4 and 6.2.5 respectively

Section 7 – Added Figure 3 - PSA progression example scenarios

Section 7.1.4 – Clarification added to explain rationale for continuing to collect metabolic test results post progression

Section 7.1.3.A – Addition of Figure 3 example progression scenarios

Section 7.1.4 – Addition of rationale for continuing metabolic tests beyond progression

Section 7.1.5.A Clarification of required tests for abiraterone and enzalutamide, specifically when one or the other is discontinued.

Section 7.1.5.C - Addition of real time monitoring of hormone results for te2 participants to check safety of combination with new SOC abiraterone, enzalutamide and apalutamide

Section 7.2.3 – Addition of SOC systemic therapy log

Section 7.2.4 – Addition of requirement to submit radiotherapy CRF even if radiotherapy not given

Section 7.3 – Nurse led follow up expanded to allow for other appropriately qualified individuals

Section 7.3.1 – Minor changes

Section 7.4.1 – Table 28 updated with new CRFs for SOC systemic therapy, and metabolic sub study CRF. Removal of baseline form, bone density risk factor. Blood form moved. Updated key for Table 29.

Section 8.1 – Clarification of consent for data collection

Section 8.1.3 – Additional wording on stopping te2 and options for pausing, switching and restarting.

Section 8.2 – New section about permitted breaks in SOC ADT treatment

Section 9.2 – Additional wording regarding analysis of “enzalutamide + abiraterone comparison”

Section 9.5 – Additional wording regarding analysis of “enzalutamide + abiraterone comparison”

Section 9.7.4 – New section detailing enhanced safety monitoring of combination new SOC and transdermal oestradiol

Section 9.10 – removal of Mann-Whitney test as relevant for original comparisons now closed.

Section 9.10.2 - Additional wording regarding analysis of “enzalutamide + abiraterone comparison”

Section 10.1 – Minor clarification to wording

Section 10.1.2 – Clarification of central monitoring processes

Section 10.1.3 – Wording updated in line with current protocol template

Section 11.1.1 – Clarification of notable events (NEs) to be collected, new cancers no longer included.

Section 11.1.2 – Addition of new SOC enzalutamide and apalutamide

Section 11.2 – Update to add requirement for investigator absence cover, updated AE, SAE and NE notification period. Figure 5 added.

Section 11.2.2 – Updated expedited reporting exemptions

Section 11.2.3.C – Expectedness removed from site investigator responsibilities. Table 37 updated

Section 11.2.3.D – Figure 6 updated. Box 1 updated

Section 11.3 – Updated process for causality queries. Clarification of Swiss reporting responsibilities

Section 11.3.1 – Expectedness added to sponsor responsibilities

Section 12.1.1.A – Updated with new SOC enzalutamide and apalutamide

Section 13 – CTA number updated

Section 15 - Clarification for SOC enza and addition of SOC apalutamide

Section 16.2 - Clarification on frequency of TSC meetings

Section 16.4 – subgroups updated

Section 16.5 – Figure 7 updated

Section 17.1 – Addition that secure email now permitted for sending CRFs

Section 17.2.2 – Minor changes, sub study is now closed

Section 17.2.4 – Removed details of biomarker sub study as now closed

Section 17.5 – New section added for metformin metabolic sub study

Section 20 – Clarification that any data released must be approved by TMG, TSC and subject to agreements

Section 22 – References updated, removal of several references linked to protocol v18 which was not released to sites

## **21.1.22 Amendments made to Protocol Version 20.0 (Oct-2020)**

Minor amendment to correct typographical, spelling, formatting and cross-reference error, or clarify wording throughout.

Minor updates to Summary of Trial table

Table 2 – ECG removed from Cardiac assessment row, weight added to waist measurement row

4.2.2 – Timeframe for pre - SOC docetaxel bloods updated from 4 months to 16 weeks in line with other timeframes.

4.4 Header title changed

4.6 Footnote 1 restored

5.2 Wording revised to allow participants to continue on STAMPEDE research treatment while co-enrolled in IMP trial, providing no interactions.

6.1.2 Header title changed

6.1.3.A Header title changed

6.2 Footnote 2 removed from Table 10

6.2.3.C – Restoration of Table 11, deleted in error when accepting tracked changes. Table 11 outlines 3 monthly blood pressure monitoring as specified in section 7.1.5.B

6.3 Header title changed

11.2.2 – Correction to bullet list exemption, text removed

## 22 REFERENCES

1. James ND, Sydes MR, Clarke NW, Mason MD, Dearnaley DP, Spears MR, et al. Addition of docetaxel, zoledronic acid, or both to first-line long-term hormone therapy in prostate cancer (STAMPEDE): survival results from an adaptive, multiarm, multistage, platform randomised controlled trial. *Lancet*. 2016;387(10024):1163-77.
2. Mason MD, Clarke NW, James ND, Dearnaley DP, Spears MR, W.S.R. A, et al. Adding celecoxib with or without zoledronic acid for hormone-naive prostate cancer: long-term survival results from an adaptive, multi-arm, multi-stage, platform, randomised controlled trial. 2017. In press. DOI: 10.1200/JCO.2016.69.0677.
3. James ND, de Bono JS, Spears MR, Clarke NW, Mason MD, Dearnaley DP, et al. Abiraterone for Prostate Cancer Not Previously Treated with Hormone Therapy. *N Engl J Med*. 2017;377(4):338-51.
4. Parker CC, James ND, Brawley CD, Clarke NW, Hoyle AP, Ali A, et al. Radiotherapy to the primary tumour for newly diagnosed, metastatic prostate cancer (STAMPEDE): a randomised controlled phase 3 trial. *Lancet*. 2018;392(10162):2353-66.
5. cancerresearchuk. Prostate cancer statistics 2015 [Available from: <http://www.cancerresearchuk.org/health-professional/cancer-statistics/statistics-by-cancer-type/prostate-cancer>].
6. Sharifi N, Gulley JL, Dahut WL, Sharifi N, Gulley JL, Dahut WL. An update on androgen deprivation therapy for prostate cancer. *Endocrine-Related Cancer*. 2010;17(4):R305-15.
7. Widmark A, Klepp O, Solberg A, Damber JE, Angelsen A, Fransson P, et al. Endocrine treatment, with or without radiotherapy, in locally advanced prostate cancer (SPCG-7/SFUO-3): an open randomised phase III trial. *Lancet*. 2009;373(9660):301-8.
8. Warde PR, Mason MD, Sydes MR, Gospodarowicz MK, Swanson GP, Kirkbride P, et al. Intergroup randomized phase III study of androgen deprivation therapy (ADT) plus radiation therapy (RT) in locally advanced prostate cancer (CaP) (NCIC-CTG, SWOG, MRC-UK, INT: T94-0110; NCT00002633). *J Clin Oncol*. 2010;28(18s Supplement: Proceedings of ASCO 2010):Abstr CRA4504.
9. Warde P, Mason M, Ding K, Kirkbride P, Brundage M, Cowan R, et al. Survival Benefit with Combined Androgen Deprivation and Radiation Therapy in Locally Advanced Prostate Cancer – Results of a Phase III Trial. *The Lancet*. 2011 - in press.
10. Mason M, Sydes M, Parulekar W, Parmar M, Anderson J, Barber J, et al. Final analysis of intergroup randomized phase III study of androgen deprivation therapy (ADT) + radiation therapy (RT) in locally advanced prostate cancer (CaP) (NCIC-CTG, SWOG, MRC-UK, INT: T94-0110). National Cancer Research Institute (NCRI) Cancer Conference 2012. 2012;2012.
11. Warde P, Mason M, Ding K, Kirkbride P, Brundage M, Cowan R, et al. Combined androgen deprivation therapy and radiation therapy for locally advanced prostate cancer: a randomised, phase 3 trial. *The Lancet*. 2011;378:2104-11.
12. Nicholas D James MRS, Noel W Clarke, David P Dearnaley, Malcolm D Mason, Christopher C Parker, Alastair W S Ritchie, J. Martin Russell, Francesca Schiavone, Gerhardt Attard, Johann S de Bono, Alison Birtle, Daniel S Engeler, Tony Elliott, David Matheson, Joe O'Sullivan, Delia Pudney, Narayanan Srihari, Jan Wallace, Jim Barber, Isabel Syndikus, Mahesh K B Parmar, Matthew R Sydes. Failure-free survival and the impact of radiotherapy in patients with newly diagnosed non metastatic prostate cancer: Data from patients in the control arm of the STAMPEDE trial (MRC PR08, CRUK/06/019). *JAMA Oncology*. 2015.
13. Sweeney CJ, Chen YH, Carducci M, Liu G, Jarrard DF, Eisenberger M, et al. Chemohormonal Therapy in Metastatic Hormone-Sensitive Prostate Cancer. *N Engl J Med*. 2015;373(8):737-46.
14. Vale CL, Burdett S, Rydzewska LH, Albiges L, Clarke NW, Fisher D, et al. Addition of docetaxel or bisphosphonates to standard of care in men with localised or metastatic, hormone-sensitive

- prostate cancer: a systematic review and meta-analyses of aggregate data. *Lancet Oncol*. 2016;17(2):243-56.
15. James ND, Ingleby FC, Clarke NW, Amos C, Attard G, Cross W, et al. Docetaxel for hormone-naive prostate cancer (PCa): Results from long-term follow-up of non-metastatic (M0) patients in the STAMPEDE randomised trial. *Annals of Oncology* [Internet]. 2019 Oct; 30. Available from: <https://doi.org/10.1093/annonc/mdz248.008a>.
  16. Fizazi K, Tran N, Fein L, Matsubara N, Rodriguez-Antolin A, Alekseev BY, et al. Abiraterone plus Prednisone in Metastatic, Castration-Sensitive Prostate Cancer. *N Engl J Med*. 2017;377(4):352-60.
  17. Hoyle AP, Ali A, James ND, Cook A, Parker CC, de Bono JS, et al. Abiraterone in "High-" and "Low-risk" Metastatic Hormone-sensitive Prostate Cancer. *Eur Urol*. 2019;76(6):719-28.
  18. Davis ID, Martin AJ, Stockler MR, Begbie S, Chi KN, Chowdhury S, et al. Enzalutamide with Standard First-Line Therapy in Metastatic Prostate Cancer. *N Engl J Med*. 2019;381(2):121-31.
  19. Chi KN, Agarwal N, Bjartell A, Chung BH, Pereira de Santana Gomes AJ, Given R, et al. Apalutamide for Metastatic, Castration-Sensitive Prostate Cancer. *N Engl J Med*. 2019;381(1):13-24.
  20. James ND, Sydes MR, Clarke NW, Mason MD, Dearnaley DP, Spears MR, et al. Addition of docetaxel, zoledronic acid, or both to first-line long-term hormone therapy in prostate cancer (STAMPEDE): survival results from an adaptive, multiarm, multistage, platform randomised controlled trial. *Lancet*. 2015.
  21. Smith MR, Finkelstein JS, McGovern FJ, Zietman AL, Fallon MA, Schoenfeld DA, et al. Changes in body composition during androgen deprivation therapy for prostate cancer. *J Clin Endocrinol Metab*. 2002;87(2):599-603.
  22. Eriksson A, Attvall S, Bonnier M, Eriksson JW, Rosander B, Karlsson FA. Short-term effects of metformin in type 2 diabetes. *Diabetes Obes Metab*. 2007;9(4):483-9.
  23. Bailey CJ. Treating insulin resistance in type 2 diabetes with metformin and thiazolidinediones. *Diabetes Obes Metab*. 2005;7(6):675-91.
  24. Ohira M, Miyashita Y, Ebisuno M, Saiki A, Endo K, Koide N, et al. Effect of metformin on serum lipoprotein lipase mass levels and LDL particle size in type 2 diabetes mellitus patients. *Diabetes Res Clin Pract*. 2007;78(1):34-41.
  25. Wulfele MG, Kooy A, de Zeeuw D, Stehouwer CD, Gansevoort RT. The effect of metformin on blood pressure, plasma cholesterol and triglycerides in type 2 diabetes mellitus: a systematic review. *J Intern Med*. 2004;256(1):1-14.
  26. Lubik AA, Gunter JH, Hendy SC, Locke JA, Adomat HH, Thompson V, et al. Insulin increases de novo steroidogenesis in prostate cancer cells. *Cancer Res*. 2011;71(17):5754-64.
  27. Venkateswaran V, Haddad AQ, Fleshner NE, Fan R, Sugar LM, Nam R, et al. Association of diet-induced hyperinsulinemia with accelerated growth of prostate cancer (LNCaP) xenografts. *J Natl Cancer Inst*. 2007;99(23):1793-800.
  28. Noto H, Goto A, Tsujimoto T, Noda M. Cancer risk in diabetic patients treated with metformin: a systematic review and meta-analysis. *PLoS One*. 2012;7(3):e33411.
  29. Rothermundt C, Hayoz S, Templeton AJ, Winterhalder R, Strebel RT, Bartschi D, et al. Metformin in chemotherapy-naive castration-resistant prostate cancer: a multicenter phase 2 trial (SAKK 08/09). *Eur Urol*. 2014;66(3):468-74.
  30. Krupski TL, Smith MR, Lee WC, Pashos CL, Brandman J, Wang Q, et al. Natural history of bone complications in men with prostate carcinoma initiating androgen deprivation therapy. *Cancer*. 2004;101(3):541-9.
  31. Langley RE, Cafferty FH, Alhasso AA, Rosen SD, Sundaram SK, Freeman SC, et al. Cardiovascular outcomes in patients with locally advanced and metastatic prostate cancer treated with luteinising-hormone-releasing-hormone agonists or transdermal oestrogen: the randomised, phase 2 MRC PATCH trial (PR09). *Lancet Oncol*. 2013;14(4):306-16.
  32. Byar DP. Proceedings: The Veterans Administration Cooperative Urological Research Group's studies of cancer of the prostate. *Cancer*. 1973;32(5):1126-30.

33. Hedlund PO, Henriksson P. Parenteral estrogen versus total androgen ablation in the treatment of advanced prostate carcinoma: effects on overall survival and cardiovascular mortality. The Scandinavian Prostatic Cancer Group (SPCG)-5 Trial Study. *Urology*. 2000;55(3):328-33.
34. Gilbert DC, Duong T, Kynaston HG, Alhasso AA, Cafferty FH, Rosen SD, et al. Quality-of-life outcomes from the Prostate Adenocarcinoma: TransCutaneous Hormones (PATCH) trial evaluating luteinising hormone-releasing hormone agonists versus transdermal oestradiol for androgen suppression in advanced prostate cancer. *BJU Int*. 2016.
35. Smith DC, Redman BG, Flaherty LE, Li L, Strawderman M, Pienta KJ. A phase II trial of oral diethylstilbestrol as a second-line hormonal agent in advanced prostate cancer. *Urology*. 1998;52(2):257-60.
36. Hsueh AJ, Peck EJ, Jr., Clark JH. Progesterone antagonism of the oestrogen receptor and oestrogen-induced uterine growth. *Nature*. 1975;254(5498):337-9.
37. Hsueh AJW, Peck Jr EJ, Clark JH. Progesterone antagonism of the oestrogen receptor and oestrogen-induced uterine growth. *Nature*. 1975;254:337.
38. Janssen. L. ZYTIGA® (abiraterone acetate) Investigator Brochure. 13 ed2017.
39. BNF. Abiraterone interactions [Available from: <https://www.medicinescomplete.com/#/content/bnf/293081460/interactions>].
40. Woo HH, Begbie S, Gogna K, Mainwaring PN, Murphy DG, Parnis F, et al. Multidisciplinary consensus: a practical guide for the integration of abiraterone into clinical practice. *Asia Pac J Clin Oncol*. 2014;10(3):228-36.
41. Zentiva. Tamsulosin 400 microgram prolonged-release hard capsules, Summary of Product Characteristics [Available from: <https://www.medicines.org.uk/emc/product/9245/smpc>].
42. Tucci M, Roca E, Ferrari L, Pia A, Dalla Volta A, Bedussi F, et al. Abiraterone and prednisone therapy may cause severe hypoglycemia when administered to prostate cancer patients with type 2 diabetes receiving glucose-lowering agents. *Endocrine*. 2019;64(3):724-6.
43. Astellas. Xtandi® (enzalutamide, MDV3100) Investigator Brochure. 11 ed2019.
44. Lipska KJ, Bailey CJ, Inzucchi SE. Use of metformin in the setting of mild-to-moderate renal insufficiency. *Diabetes Care*. 2011;34(6):1431-7.
45. Merck. Glucophage 500 mg film coated tablets Summary of Product Characteristics [Available from: <https://www.medicines.org.uk/emc/product/987/smpc>].
46. Salpeter SR, Greyber E, Pasternak GA, Salpeter EE. Risk of fatal and nonfatal lactic acidosis with metformin use in type 2 diabetes mellitus: systematic review and meta-analysis. *Arch Intern Med*. 2003;163(21):2594-602.
47. Viani GA, Bernardes da Silva LG, Stefano EJ. Prevention of gynecomastia and breast pain caused by androgen deprivation therapy in prostate cancer: tamoxifen or radiotherapy? *International journal of radiation oncology, biology, physics*. 2012;83(4):e519-24.
48. Hussain M, Tangen CM, Berry DL, Higano CS, Crawford ED, Liu G, et al. Intermittent versus continuous androgen deprivation in prostate cancer. *N Engl J Med*. 2013;368(14):1314-25.
49. Royston P, Parmar MKB, Qian W. Novel designs for multi-arm clinical trials with survival outcomes with an application in ovarian cancer. *Statistics in Medicine*. 2003;22(14):2239-56.
50. Royston P, Barthel FMS, Parmar MKB, Choodari-Oskooei B, Isham V. Designs for clinical trials with time-to-event outcomes based on stopping guidelines for lack of benefit. *Trials*. 2011;12(1):81.
51. Royston P. nstage: MAMS trial sample size calculator. MRC Clinical Trials Unit, London2009.
52. Mason MD, Parulekar WR, Sydes MR, Brundage M, Kirkbride P, Gospodarowicz M, et al. Final Report of the Intergroup Randomized Study of Combined Androgen-Deprivation Therapy Plus Radiotherapy Versus Androgen-Deprivation Therapy Alone in Locally Advanced Prostate Cancer. *J Clin Oncol*. 2015;33(19):2143-50.
53. James ND, Sydes MR, Mason MD, Clarke NW, Anderson J, Dearnaley DP, et al. Celecoxib plus hormone therapy versus hormone therapy alone for hormone-sensitive prostate cancer: first results from the STAMPEDE multiarm, multistage, randomised controlled trial. *The Lancet Oncology*. 2012;13(5):549-58.

54. Haybittle JL. Repeated assessment of results in clinical trials of cancer treatment. *Br J Radiol.* 1971;44(526):793-7.
55. Peto R, Pike MC, Armitage P, Breslow NE, Cox DR, Howard SV, et al. Design and analysis of randomized clinical trials requiring prolonged observation of each patient. I. Introduction and design. *Br J Cancer.* 1976;34(6):585-612.



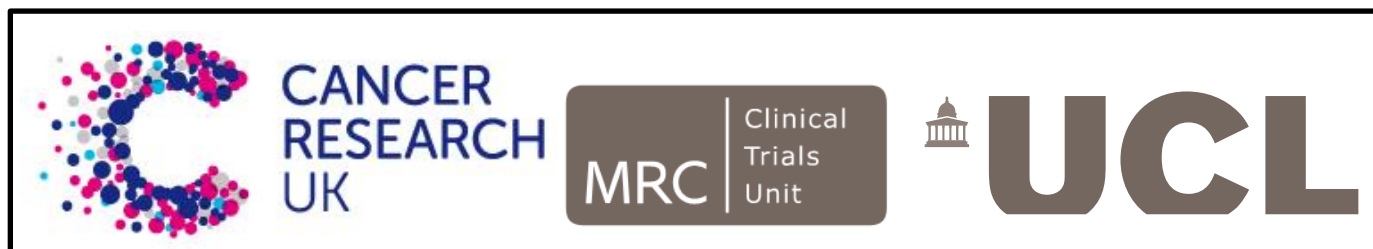

# STAMPEDE

## Systemic Therapy in Advancing or Metastatic Prostate Cancer: Evaluation of Drug Efficacy

### A multi-arm multi-stage randomised controlled trial

#### MRC PR08

ISRCTN number: ISRCTN78818544  
EUDRACT number: 2004-000193-31  
CTA number: 00316/0026/001-0001  
NCT number: NCT00268476

## STATISTICAL ANALYSIS PLAN for analysis of the “Enzalutamide + abiraterone comparison” including appendix A describing meta-analyses of M0 and M1 patients with the “abiraterone comparison”

---

#### MRC Clinical Trials Unit at UCL

**Tel:** +44 (0)20 7670 4798  
**Fax:** +44 (0)20 7670 4818  
**Email:** mrcctu.stampede@ucl.ac.uk

**Version date:** 4.0, 07-June-2022  
Will replace version 3.0 (30-July-2021)

#### Contacts

Laura Murphy  
Chris Brawley  
Louise Brown

This template and all preceding versions will be stored in the Statistical Analysis Master File for this trial held in S:\MRCCTU\_Stampede\_Stats\SAP

---

**CONTENTS**

|            |                                                                                     |           |
|------------|-------------------------------------------------------------------------------------|-----------|
| <b>1</b>   | <b>ABBREVIATIONS</b> .....                                                          | <b>4</b>  |
| <b>2</b>   | <b>BACKGROUND AND DESIGN</b> .....                                                  | <b>6</b>  |
| <b>2.1</b> | <b>TRIAL SUMMARY</b> .....                                                          | <b>6</b>  |
| <b>2.2</b> | <b>COMPARISONS</b> .....                                                            | <b>7</b>  |
| <b>2.3</b> | <b>ELIGIBILITY CRITERIA</b> .....                                                   | <b>9</b>  |
| <b>2.4</b> | <b>METHOD OF RANDOMISATION</b> .....                                                | <b>10</b> |
| <b>2.5</b> | <b>ALLOCATION RATIO</b> .....                                                       | <b>10</b> |
| <b>3</b>   | <b>DATA COLLECTION AND PROCESSING</b> .....                                         | <b>11</b> |
| <b>3.1</b> | <b>CASE REPORT FORMS AND VARIABLES</b> .....                                        | <b>11</b> |
| <b>3.2</b> | <b>DATA COMPLETION SCHEDULE FOR CONSENT, BASELINE, TREATMENT &amp; FOLLOW-UP</b> .. | <b>11</b> |
| <b>3.3</b> | <b>DATA COMPLETION SCHEDULE FOR OTHER 'NON-SCHEDULED' CRFS</b> .....                | <b>12</b> |
| <b>3.4</b> | <b>MANAGEMENT OF DATASETS</b> .....                                                 | <b>12</b> |
| 3.4.1      | Data Cleaning .....                                                                 | 12        |
| 3.4.2      | Data verification.....                                                              | 13        |
| 3.4.3      | Database Lock .....                                                                 | 14        |
| <b>3.5</b> | <b>DATA CODING</b> .....                                                            | <b>14</b> |
| 3.5.1      | Free-text variables .....                                                           | 14        |
| <b>3.6</b> | <b>PRE-PLANNED DATA CHECKS</b> .....                                                | <b>14</b> |
| <b>3.7</b> | <b>DATA RETURNS</b> .....                                                           | <b>15</b> |
| <b>3.8</b> | <b>DATA MATURITY</b> .....                                                          | <b>15</b> |
| <b>3.9</b> | <b>MISSING DATA</b> .....                                                           | <b>15</b> |
| <b>4</b>   | <b>OUTCOME MEASURES</b> .....                                                       | <b>16</b> |
| <b>5</b>   | <b>SAMPLE SIZE CALCULATIONS</b> .....                                               | <b>20</b> |
| <b>5.1</b> | <b>SAMPLE SIZE</b> .....                                                            | <b>20</b> |
| <b>5.2</b> | <b>SAMPLE SIZE FOR INTERMEDIATE ANALYSES</b> .....                                  | <b>20</b> |
| <b>5.3</b> | <b>FURTHER DETAILS IN SAMPLE SIZE CALCULATIONS AND DESIGN</b> .....                 | <b>21</b> |
| <b>6</b>   | <b>STATISTICAL ANALYSIS</b> .....                                                   | <b>22</b> |
| <b>6.1</b> | <b>TIME PERIODS</b> .....                                                           | <b>22</b> |
| <b>6.2</b> | <b>POPULATIONS FOR ANALYSIS</b> .....                                               | <b>23</b> |
| <b>6.3</b> | <b>RECRUITMENT AND PATIENT FLOW</b> .....                                           | <b>24</b> |
| 6.3.1      | Recruitment.....                                                                    | 24        |
| 6.3.2      | patient flow through the trial.....                                                 | 24        |
| <b>6.4</b> | <b>BASELINE CHARACTERISTICS</b> .....                                               | <b>24</b> |
| <b>6.5</b> | <b>STANDARD OF CARE TREATMENT</b> .....                                             | <b>25</b> |
| <b>6.6</b> | <b>TRIAL TREATMENT</b> .....                                                        | <b>26</b> |
| <b>6.7</b> | <b>SURVIVAL OUTCOME MEASURES</b> .....                                              | <b>27</b> |
| 6.7.1      | primary outcome measure .....                                                       | 27        |
| 6.7.2      | secondary outcome measures .....                                                    | 27        |
| 6.7.3      | statistical analysis methods .....                                                  | 27        |
| 6.7.4      | Proportional and non-proportional hazards .....                                     | 28        |
| 6.7.5      | Competing Risks .....                                                               | 29        |
| 6.7.7      | patients with no data post randomisation .....                                      | 29        |
| 6.7.8      | withdrawn patients with outcome data.....                                           | 29        |
| 6.7.9      | sensitivity analysis to assess impact of covid-19 pandemic.....                     | 29        |
| <b>6.8</b> | <b>PRE-SPECIFIED SUBGROUP ANALYSES</b> .....                                        | <b>29</b> |

---

|             |                                                    |           |
|-------------|----------------------------------------------------|-----------|
| 6.8.1       | Stratification Factors used for minimisation ..... | 30        |
| 6.8.2       | OTHER PRE-SPECIFIED SUBGROUP ANALYSIS .....        | 30        |
| 6.8.2.1     | Metastatic volume in M1 patients.....              | 30        |
| <b>6.9</b>  | <b>PSA RESPONSE .....</b>                          | <b>30</b> |
| <b>6.10</b> | <b>TOXICITY AND SAFETY ANALYSES.....</b>           | <b>31</b> |
| <b>6.11</b> | <b>QUALITY-OF-LIFE ANALYSIS.....</b>               | <b>33</b> |
| <b>6.12</b> | <b>HEALTH ECONOMICS.....</b>                       | <b>33</b> |
| <b>7</b>    | <b>SIGNATURES OF APPROVAL .....</b>                | <b>41</b> |

## 1 ABBREVIATIONS

| Abbreviation | Expansion                                                           |
|--------------|---------------------------------------------------------------------|
| <b>Abi</b>   | Abiraterone                                                         |
| <b>ADT</b>   | Androgen-deprivation therapy                                        |
| <b>AMP</b>   | Adenosine monophosphate                                             |
| <b>AS</b>    | Activity Stage                                                      |
| <b>BMD</b>   | Bone mineral density                                                |
| <b>CCI</b>   | Comparison Chief Investigator                                       |
| <b>Cel</b>   | Celecoxib                                                           |
| <b>CHF</b>   | Congestive heart failure                                            |
| <b>CI</b>    | Chief Investigator                                                  |
| <b>CI</b>    | Confidence interval                                                 |
| <b>CRF</b>   | Case Report Form                                                    |
| <b>CTCAE</b> | Common Toxicity Criteria for Adverse Events                         |
| <b>CTU</b>   | Clinical Trials Unit                                                |
| <b>CV</b>    | Cerebrovascular                                                     |
| <b>DAB</b>   | Dual Androgen Blockade                                              |
| <b>DMP</b>   | Data Management Plan                                                |
| <b>Doc</b>   | Docetaxel                                                           |
| <b>DAB</b>   | Dual Androgen Blockade (previously Maximum Androgen Blockade [MAB]) |
| <b>Enza</b>  | Enzalutamide                                                        |
| <b>ES</b>    | Efficacy Stage                                                      |
| <b>FFS</b>   | Failure-free survival                                               |
| <b>FPM</b>   | Flexible parametric models                                          |
| <b>HE</b>    | Health Economics                                                    |
| <b>HEAP</b>  | Health Economics Analysis Plan                                      |
| <b>HR</b>    | Hazard ratio                                                        |
| <b>HT</b>    | Hormone therapy                                                     |
| <b>IDMC</b>  | Independent Data Monitoring Committee                               |
| <b>ITT</b>   | Intention-to-treat                                                  |
| <b>KM</b>    | Kaplan-Meier                                                        |
| <b>LHRH</b>  | Luteinising hormone-releasing hormone                               |
| <b>LOB</b>   | Lack-of-benefit                                                     |
| <b>MO</b>    | Non-metastatic                                                      |
| <b>M1</b>    | Metastatic                                                          |
| <b>MACE</b>  | Major adverse cardiac event                                         |
| <b>MAMS</b>  | Multi-arm multi-stage                                               |
| <b>MCAR</b>  | Missing completely at random                                        |
| <b>MI</b>    | Myocardial infarction                                               |
| <b>MPFS</b>  | Metastatic progression-free survival                                |
| <b>MRC</b>   | Medical Research Council                                            |
| <b>N+</b>    | Lymph node-positive                                                 |
| <b>N0</b>    | Lymph node-negative                                                 |
| <b>NX</b>    | Lymph node stage unknown                                            |
| <b>NSAID</b> | Non-steroidal anti-inflammatory drug                                |
| <b>ONS</b>   | Office of National Statistics                                       |
| <b>OS</b>    | Overall survival                                                    |
| <b>PCa</b>   | Prostate cancer                                                     |
| <b>PH</b>    | Proportional hazards                                                |
| <b>PHE</b>   | Public Health England                                               |
| <b>PSA</b>   | Prostate specific antigen                                           |
| <b>q6wk</b>  | Every 6 weeks                                                       |
| <b>q12wk</b> | Every 12 weeks                                                      |
| <b>q6m</b>   | Every 6 months                                                      |

---

| <b>Abbreviation</b> | <b>Expansion</b>                       |
|---------------------|----------------------------------------|
| <b>q12m</b>         | Every 12 months                        |
| <b>QL</b>           | Quality of Life                        |
| <b>RMST</b>         | Restricted mean survival time          |
| <b>rPFS</b>         | Radiological progression-free survival |
| <b>RT</b>           | Radiotherapy                           |
| <b>RTOG</b>         | Radiation Therapy Oncology Group       |
| <b>SAE</b>          | Serious adverse event                  |
| <b>SAP</b>          | Statistical Analysis Plan              |
| <b>SOC</b>          | Standard-of-care                       |
| <b>SOP</b>          | Standard Operating Procedures          |
| <b>TBD</b>          | To be determined                       |
| <b>TMG</b>          | Trial Management Group                 |
| <b>TSC</b>          | Trial Steering Committee               |
| <b>WHO PS</b>       | WHO Performance Status                 |
| <b>ZA</b>           | Zoledronic acid                        |

## 2 BACKGROUND AND DESIGN

This section gives a brief summary of the trial, including the trial aims/objectives; treatment/randomisation arms; main outcomes; and the patient eligibility criteria.

Full details of the background to the trial and its design are presented within the current, activated version of the protocol (Version 23.0; Oct-2021).

### 2.1 TRIAL SUMMARY

STAMPEDE is a multi-centre, platform protocol, including a number of randomised controlled trials. It recruits patients with locally advanced (M0) or metastatic (M1) prostate cancer who are starting long-term androgen-deprivation therapy (ADT) for the first time. Patients can have either newly-diagnosed disease or have been previously treated with radical radiotherapy or surgery but now have a rising prostate specific antigen (PSA). Further details on eligibility can be found in section 2.3.

The trial uses multi-arm, multi-stage (MAMS) methods to simultaneously assess a number of different research treatments. The trial aims to assess the effects of adding one or two approaches to the standard-of-care (SOC).

The investigational agents to date are:

- (i) A bisphosphonate, zoledronic acid
- (ii) A cytotoxic chemotherapeutic agent, docetaxel
- (iii) A cyclooxygenase (Cox-2) inhibitor, celecoxib
- (iv) A CYP-17 inhibitor, abiraterone
- (v) Radiotherapy to the prostate amongst newly-diagnosed M1 patients only
- (vi) An androgen receptor signalling inhibitor, enzalutamide
- (vii) Metformin
- (viii) Transdermal oestradiol (tE2)

Patients on the control arm receive the standard-of-care; the research arms have this standard supplemented with other potential treatments, except for patients allocated to the tE2 arm who receive transdermal oestradiol in place of standard hormone treatment.

The standard-of-care is based on ADT, achieved through the use of luteinising hormone-releasing hormone (LHRH) analogues or antagonists, Dual Androgen Blockade (DAB: long-term anti-androgens in combination with LHRH agonist) or bilateral orchidectomy according to local practice (bicalutamide for non-metastatic (M0) patients was allowed in some early versions of the Protocol). This standard-of-care is also the backbone of therapy for the research arms.

Standard-of-care radiotherapy (RT) was mandated for all NOM0 patients (unless contraindicated) and encouraged for N+M0 patients. RT to the prostate was permitted for M1 patients, too, although whilst the M1|RT research Arm H was recruiting, radiotherapy was not permitted as SOC for newly-diagnosed M1 patients and should only be received through allocation to Arm H for patients corresponding to this sub-set.

Standard-of-care docetaxel was permitted from Protocol version 14.0 (Dec-2015) onwards, following the results of STAMPEDE's "original comparisons"<sup>1</sup>, along with other external trial results combined within a meta-analysis<sup>2</sup>.

Planned use of docetaxel, as reported at randomisation, is included as a stratification factor from this time.

## 2.2 COMPARISONS

A research comparison is defined by those patients allocated to the research arm, along with the corresponding contemporaneously randomised, eligible control arm patients. See Table 1 for the definition of each research comparison within STAMPEDE to date.

**Table 1: STAMPEDE Research Comparisons**

| COMPARISON NAME                          | INCLUDED ARMS | ELIGIBLE PATIENTS                                                            | ACCRUAL     |              | TIME PERIOD(s) | NB   |
|------------------------------------------|---------------|------------------------------------------------------------------------------|-------------|--------------|----------------|------|
|                                          |               |                                                                              | START DATE  | END DATE     |                |      |
| "Zoledronic acid comparison"             | A, B          | All patients                                                                 | 05-Oct-2005 | 31-Mar-2013  | 1-4            | Note |
| "Docetaxel comparison"                   | A, C          | All patients                                                                 | 05-Oct-2005 | 31-Mar-2013  | 1-4            | Note |
| "Celecoxib comparison"                   | A, D          | All patients                                                                 | 05-Oct-2005 | 06-Apr-2011  | 1              | Note |
| "Zoledronic acid + docetaxel comparison" | A, E          | All patients                                                                 | 05-Oct-2005 | 31-Mar-2013  | 1-4            | Note |
| "Zoledronic acid + celecoxib comparison" | A, F          | All patients                                                                 | 05-Oct-2005 | 06-Apr-2011  | 1              | Note |
| "Abiraterone comparison"                 | A, G          | All patients                                                                 | 15-Nov-2011 | 17-Jan-2014* | 3-5            | Note |
| "M1 RT comparison"                       | A, H          | Newly-diagnosed M1 pts<br>No contraindication to RT                          | 22-Jan-2013 | 02-Sep-2016  | 4-9            | Note |
| "Enzalutamide + abiraterone comparison"  | A, J          | All patients                                                                 | 29-Jul-2014 | 31-Mar-2016  | 7-9            | Note |
| "Metformin comparison"                   | A, K          | Non-diabetic pts<br>No contraindication to metformin                         | 05-Sep-2016 | TBD          | 10-TBD         | ---  |
| "tE2 comparison"                         | A, L          | <8wk anti-androgen use<br>Maximum 4wk LHRH t'py<br>No bilateral orchidectomy | 20-Jun-2017 | TBD          | 11-TBD         | ---  |

**\*Note:** One patient was manually randomised to Arm G after the cut-off of 17-Jan-2014

**D, F:** The celecoxib-containing arms closed accrual early due to lack of sufficient activity following their Activity Stage 2 analysis.

**B, C, E:** The remaining original research arms closed to recruitment having reached an acceptable sample size (based on time to analysis projections).

**G:** The abiraterone arm closed to recruitment having reached its revised sample size target (1800 pts) ahead of schedule.

**H:** The M1|RT arm closed to recruitment having reached its revised target sample size ahead of schedule.

**J:** The enzalutamide + abiraterone arm closed to recruitment having reached its target sample size ahead of schedule.

<sup>1</sup> [http://www.thelancet.com/pdfs/journals/lancet/PIIS0140-6736\(15\)01037-5.pdf](http://www.thelancet.com/pdfs/journals/lancet/PIIS0140-6736(15)01037-5.pdf)

<sup>2</sup> [http://www.thelancet.com/pdfs/journals/lanonc/PIIS1470-2045\(15\)00489-1.pdf](http://www.thelancet.com/pdfs/journals/lanonc/PIIS1470-2045(15)00489-1.pdf)

The trial is summarised at relevant times for this comparison in Figures 1 and 2. The trial initially started with Arms A to F. Additional research arms have been included in the trial over time.

At the time a new research arm is activated, the strata totals in the randomisation system are reset; the team checks for imbalances before this occurs. Consideration is given to applying a small weight to the reset total to help correct this only if there is a major imbalance, defined as a difference of 12 patients or more in any given strata (NB to date this has not been required).

**Figure 1: Recruiting arms from Jul-2014 to Mar-2016 (Protocol version 12.0)**

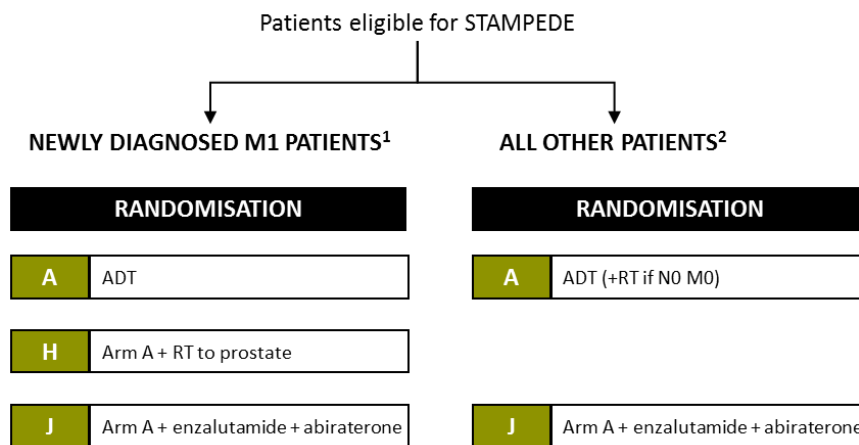

<sup>1</sup> except pts with a contra-indication to RT

<sup>2</sup> all suitable pts with newly diagnosed locally advanced disease should also have RT<sup>1</sup>



**Figure 2: Activity-by-time graph showing patients contributing to this comparison**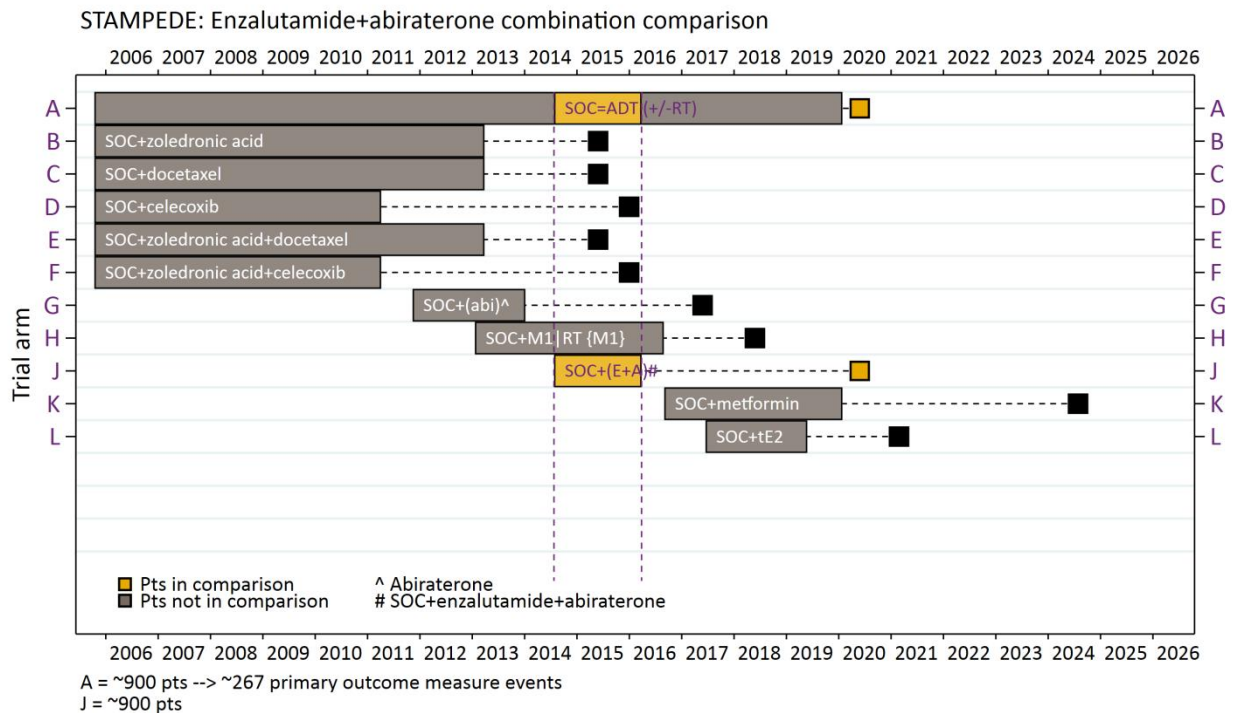

### 2.3 ELIGIBILITY CRITERIA

The eligibility criteria describe a broad population of patients unified by the need to start long-term ADT for the first time.

In the broadest terms, this includes patients who have had previous local therapy and now have high-risk relapse, along with patients with newly-diagnosed disease. For this comparison, this included patients with:

- High-risk locally advanced disease (at least two of: Stage T3/4 N0 M0 histologically confirmed prostate adenocarcinoma, PSA $\geq$ 40ng/ml or Gleason sum score 8-10)
- Nodal involvement
- Metastatic disease

All patients need to give written consent, be sufficiently fit for any protocol treatment and follow-up, and meet other detailed eligibility criteria.

The details of the eligibility criteria have changed a little over time; this is shown by protocol version in a specific document <sup>3</sup> which will continue to be updated throughout the trial.

<sup>3</sup> S:\MRCCTU\_Stampede\10 Audit & Quality Control\10.1\_Monitoring & QC\10.1.1\_Monitoring Tools



### 3 DATA COLLECTION AND PROCESSING

#### 3.1 CASE REPORT FORMS AND VARIABLES

Full details of data collection and timings are described in the protocol<sup>7</sup>.

A copy of the Case Report Forms (CRFs) and Quality of Life (QL) questionnaires are presented in the Statistical Master File and the Trial Master File. Details of the variables, and any corresponding validations, are presented in the metadata which forms part of the Trial Master File.

#### 3.2 DATA COMPLETION SCHEDULE FOR CONSENT, BASELINE, TREATMENT & FOLLOW-UP

A record of consent to trial participation in the J comparison is held by the MRC CTU for 1773/1976 patients randomised; for the remaining 203 patients, consent was collected by the local site prior to randomisation but a copy of the completed consent form was not available to the MRC CTU at the time the data were frozen. All patients are included in analyses to maintain the ITT integrity of the trial results.

Table 2 gives detail on the expected timing of scheduled CRFs. Please note that this only applies to arm J; please see earlier versions of the SAP for detail of timings for other comparisons.

**Table 2: Timings for completion of scheduled CRFs on arm J**

| TIMING OF ASSESSMENT | BASELINE          |         | TREATMENT |         | OUTCOMES  |       | FREQ      |
|----------------------|-------------------|---------|-----------|---------|-----------|-------|-----------|
|                      | RAND <sup>N</sup> | PRE-TRT | RT        | SOC Doc | FOLLOW-UP | QL HE |           |
| Yr 0 Wk 0            | ✓                 | ✓       |           |         |           | ✓     |           |
| Wk 6                 |                   |         |           |         | ✓         | ✓     | 6 weekly  |
| Wk 12                |                   |         |           |         | ✓         | ✓     |           |
| Wk 18                |                   |         |           |         | ✓         | ✓     |           |
| Wk 24                |                   |         |           | J only  | ✓         | ✓     |           |
| Wk 36                |                   |         |           |         | ✓         | ✓     | 12 weekly |
| Wk 48                |                   |         | M0 only   |         | ✓         | ✓     |           |
| Wk 60                |                   |         |           |         | ✓         | ✓     |           |
| Wk 72                |                   |         |           |         | ✓         | ✓     |           |
| Wk 84                |                   |         |           |         | ✓         | ✓     |           |
| Wk 96                |                   |         |           |         | ✓         | ✓     |           |
| Yr 2 Month 24        |                   |         |           |         | ✓         | ✓     | 6 monthly |
| Month 30             |                   |         |           |         | ✓         | ✓     |           |
| Yr 3 Month 36        |                   |         |           |         | ✓         | ✓     |           |
| Month 42             |                   |         |           |         | ✓         | ✓     |           |
| Yr 4 Month 48        |                   |         |           |         | ✓         | ✓     |           |
| Month 54             |                   |         |           |         | ✓         | ✓     |           |
| Yr 5 Month 60        |                   |         |           |         | ✓         | ✓     |           |
| Yr 6+                |                   |         |           |         | ✓         | ✓     | annual    |

**Note:**

<sup>7</sup> S:\MRCCTU\_Stampede\01 Study Protocol\_Key Documents\1.1 Signed Protocol

Pre-Trt assessment includes the following CRFs: baseline, cardiovascular, bone density risk factor questionnaire.

QL & HE data were collected for the first 700 patients randomised and then for all patients randomised from Protocol v8.0 onwards (Nov-2011) who opt-in.

QL & HE data is collected until disease progression.

SOC Doc forms are required for all patients randomised from 17-Dec-2015, when the change in SOC to permit upfront docetaxel use was implemented, and for any patients randomised before this date and receiving upfront docetaxel.

### 3.3 DATA COMPLETION SCHEDULE FOR OTHER 'NON-SCHEDULED' CRFS

The following CRFs should be completed as required:

- Hormone therapy log (All Arms)
- Abiraterone & enzalutamide treatment log (Arms G & J)
- Toxicity form (All Arms)
- RT acute toxicity form (All Arms, pts who received RT only)
- Progression log (All Arms)
- Additional treatment log (All Arms)
- Saliva pathology form (All Arms)
- Blood form (All Arms)
- SAE form (All Arms)
- End of research treatment form (Research Arms only)
- Co-enrolment form (All Arms)
- Death form (All Arms)

For all CRFs, details of associated timings and requirements are given within their guidance notes.

### 3.4 MANAGEMENT OF DATASETS

The datasets will be managed in accordance with CTU Standard Operating Procedures (SOPs) and in accordance with the Data Management Plan<sup>8</sup>. Full details of data cleaning, verification and lock procedures are contained in this document.

#### 3.4.1 DATA CLEANING

Routine data extracts are run on an approximate fortnightly basis. In preparation for an IDMC review and interim or final efficacy analysis, several of these extracts will be used, at least one to check the data and a final one for analysis. The statistician will work with the data managers to resolve as many queries and discrepancies as possible (entered onto MACRO prior to the final freeze) and this process will be formally documented with the exact details agreed prior to the analysis in the in the Database Lock Quality Checklist.

If any outstanding data queries are resolved during the analysis that relate to data in the final copied dataset (eg. problems that are found during analysis or amended CRFs that are returned to CTU), and it is desired to

---

<sup>8</sup> S:\MRCCTU\_Stampede\08 Data Management\8.6 Data Management Plan

include these changes in the report or analysis being run, corrections should be made in MACRO as usual but the data should not be extracted again. Rather, the corrections should be made in the Statistician's analysis files and appropriately highlighted and annotated (notably any confirmed changes should only be made within cr\_fieldupdates.do). For the primary analysis the Senior Statistician will decide on a case-by-case basis whether a correction warrants exporting the data again.

Datasets for all analyses will be constructed and analyses performed using Stata programs (\*.do).

### 3.4.2 DATA VERIFICATION

Data verification, consistency and range checks are performed at the data entry stage by the CTU, as well as checks for missing data, as documented in the trial working practices (copies of these checks can be found in the Trial Master File). Additional range, consistency and missing data checks will be performed automatically within the MACRO databases, as programmed in the database. Copies of the data chase and query report forms are stored electronically, with completed and returned forms stored in patient files. Some of the checks may be duplicated and others will be performed when the datasets for analysis are constructed by the statistician. All outcome variables (primary and secondary) including treatment details will be examined for unusual, outlying, unlabelled or inconsistent values by the Statistician.

In general, given the thorough nature of our follow-up procedure we expect the issue of missing data to be relatively minimal. We anticipate high compliance with initial data collection as this is close to the time of patient registration. If any data is missing, imputation will not routinely be done for the main analyses, but this may be reconsidered if recommended or requested. Sensitivity analyses may be undertaken which include additional variables in statistical models, e.g. alternative adjusted Cox models including other variables considered to be predictive of the outcome. For these analyses, missing values of adjustment variables may be multiply imputed under the Missing At Random (MAR) assumption to avoid reliance on complete case analysis.

Data from sites on overall survival, the definitive primary outcome for patients with baseline M1 disease and a component of the metastasis-free survival primary outcome for patients with baseline M0 disease, and other outcome measures may be supplemented by linked data from the Office of National Statistics (ONS) or a similar system. This would be used to ascertain the final survival status of those not reported as having died on the most recent follow-up, and additionally to help in the ascertainment of causes of death.

Any problems with trial data will be queried with the Trial Managers, Data Managers, or Statistician(s), as appropriate. Where possible, data queries will be resolved, although it is accepted that due to administrative reasons and data availability, the dataset cannot be perfect. Evidence of preferential data collection on one arm would be unacceptable and further data cleaning would be required.

Prior to formal final primary analyses an additional set of checks will be completed. These include a Trial Manager checking primary outcome data in MACRO against the original CRFs (including date of death) for a sample of patients to ensure concordance. These checks are detailed in the Trial Management File, kept by the STAMPEDE Trial Managers.

### 3.4.3 DATABASE LOCK

A copy of the trial databases will be locked before the primary activity analysis for each research comparison once the Database Lock Quality Checklist has been agreed and the conditions met. However, the live databases will remain open, as long-term follow-up data for patients may be collected in the database after this final activity stage analysis. Additionally, some patients contribute to multiple comparisons that may mature at differing times.

## 3.5 DATA CODING

The coding of the raw variables can be found in the metadata<sup>9</sup>. The latest version has the largest version number "X" at the end of the document name.

Coding of variables for analysis can be found in the [Analysis File Specification documentation](#)<sup>10</sup>.

### 3.5.1 FREE-TEXT VARIABLES

If required, review and (re-)coding of free-text variables is carried out by a clinical member of the TMG.

Such free-text variables to be reviewed and (re-)coded include:

- Those items reported as "other, specify", including reason for treatment action; toxicity; additional treatment; and place of death.
- Concomitant medications (collected as free-text at baseline; up to Protocol v15.0, Sep-2016)

## 3.6 PRE-PLANNED DATA CHECKS

- Current ADT on randomisation form *vs* baseline form (patients randomised before 05-Sep-2016; check for concordance)
- Broad disease category *vs* [pre-HT PSA value, metastatic status, nodal status, gleason score, previous treatment reported]; check for concordance
- Disease progression on FU form *vs* progression form; check for concordance
- Death on progression form *vs* death form [deaths reported before 05-Sep-2016]; check for concordance
- Death reported as an SAE on Death CRF *vs* SAE form with death reported
- Metastatic status (M0 versus M1) concordance between randomisation server and subsequent randomisation form. In a small number of patients, the assessment of metastatic status at randomisation can change on the basis of subsequent testing and imaging such that the randomisation form becomes a more correct representation of the true metastatic status of the patient. For the purposes of separating M0 and M1 analyses, the data from the randomisation form (rather than the rando server) will be used to select patients. The number of patients in whom this status changed will be described in any data report. It is acknowledged that the minimisation factors will differ slightly from the true status.

---

<sup>9</sup> S:\MRCCTU\_Stampede\08 Data Management\8.4 Metadata and Data Handling\Metadata\STAMPEDE Metadata vX

<sup>10</sup> S:\MRCCTU\_Stampede\_Stats\Data\Auto\_Macro\Analysis File Spec

### 3.7 DATA RETURNS

- Data Forms returned compared to expectations (routine forms only; randomisation, baseline (incl. cardiovascular & BD Risk), follow-up, radiotherapy detail/acute toxicity)
- Death, progression and end of trial participation forms received for the control arm
- FU forms expected vs number of FU forms received, for each patient
- Scatter plot of timing of most recent received FU for each patient vs time from randomisation, by treatment arm (including detail on number of patients randomised, number of deaths, number of withdrawals, number okay and number late for follow-up)
- Number of FU forms dated within each week since patient's randomisation
- Time since last FU form (KM graph; subgroup: randomised <24wks vs 24+wks)
- Duration of follow-up after randomisation (time from randomisation to last contact), by arm, with median using reverse KM plot
- For surviving patients, the time since last follow-up form received, by treatment arm
- Details of patients Lost-to-FU or for whom early stopping of follow-up and data collection has been reported

### 3.8 DATA MATURITY

Median follow-up time will be calculated using a "reversed" Kaplan-Meier approach, taking censor date (if alive) to be an event and death as the time of censorship. The median follow-up time will be detailed by arm and within any pre-defined sub-groups of interest. In patients who were last known to be alive, time to last follow-up will be presented using standard summary statistics. Date last seen (if alive) is as defined within the censor date in Table 4.

### 3.9 MISSING DATA

Missing data will be assumed to be missing completely at random (MCAR) in the main intention-to-treat analyses. Information on covariates included in the main pre-specified analysis models is collected at randomisation so these key variables should be complete in most cases.

Where appropriate, for sensitivity analyses and additional exploratory analyses, missing data on explanatory variables to be included in analysis models may be multiply imputed using the Missing At Random (MAR) assumption to avoid reliance on complete-case analysis. Evidence in favour of the MAR assumption will be presented at the same time and sensitivity analyses conducted to assess the impact of data being Missing Not At Random (MNAR) on estimates of treatment effect.

## 4 OUTCOME MEASURES

For all outcome measures the comparison is between patients on the relevant research arm and those contemporaneously randomised control arm patients eligible for the research arm of interest. Outcomes are listed in Table 3 and definitions are provided in Table 4.

**Note:** All arms are un-blinded so primary outcome measures for all comparisons are objectively measured, with caution to be taken around interpretation of more subjective secondary outcome measures such as symptomatic skeletal events.

As for other comparisons, the “enzalutamide+abiraterone comparison” (A-J) was originally designed to use Failure-Free-Survival (FFS) as the intermediate outcome and Overall Survival (OS) as the final primary outcome. However, the ICECaP meta-analysis of patients with M0 disease has demonstrated that Metastasis-Free-Survival (MFS), defined as time from randomisation to distant metastases confirmed by imaging or histological evidence or death from any cause, is a robust surrogate outcome measure for OS in this M0 patient group (9). Therefore, MFS was added to the list of outcome measures in 2021 and will become the primary outcome measure for M0 patients in the combined A-G and A-J analysis. Details for this analysis are provided in Appendix A. Primary outcome measure remains OS for M1 patients and details for meta-analysis methods combining the A-G and A-J comparisons are also provided in Appendix A.

**Table 3: Trial outcome measures by comparison stage for the A-J comparison**

| COMPARISON STAGE       | PRIMARY OUTCOME MEASURE                  | SECONDARY OUTCOME MEASURES <sup>T</sup>                                                                                                                                                                                                                                                                    |
|------------------------|------------------------------------------|------------------------------------------------------------------------------------------------------------------------------------------------------------------------------------------------------------------------------------------------------------------------------------------------------------|
| <b>Pilot phase(s)</b>  | Safety <sup>*</sup>                      | Feasibility                                                                                                                                                                                                                                                                                                |
| <b>Activity Stages</b> | Failure-free survival (FFS) <sup>†</sup> | Overall survival (OS) <sup>x</sup><br>Biochemical Failure<br>Progression-free-survival (PFS)<br>Disease-specific survival<br>Non-PCa death<br>Lymph node progression<br>Distant metastases (Metastatic Progression-Free Survival)<br>Toxicity<br>Skeletal related events (SREs)<br>Therapy for progression |
| <b>Efficacy Stage</b>  | Overall survival <sup>x</sup>            | All OMs as for Activity Stages plus:<br>Metastasis-Free-Survival <sup>^</sup><br>Cost effectiveness                                                                                                                                                                                                        |

<sup>T</sup> Presented at activity stages where data is mature

<sup>\*</sup> Based on toxicity

<sup>†</sup> Including biochemical failure (see Table 4 for definition of FFS)

<sup>x</sup> Cause of death with a view to cause-specific survival from PCa (with death from other causes as a competing risk) is considered under this.

<sup>^</sup> As defined in ICECaP 2017 JCO paper: DOI: 10.1200/JCO.2017.73.9987



**Table 4: Definition of outcome measures and censoring dates**

| TERM                                        | DEFINITION                                                                                                                                                                                                                                                                                                                                                                                                                                                                                                                                                                                    |
|---------------------------------------------|-----------------------------------------------------------------------------------------------------------------------------------------------------------------------------------------------------------------------------------------------------------------------------------------------------------------------------------------------------------------------------------------------------------------------------------------------------------------------------------------------------------------------------------------------------------------------------------------------|
| Overall survival (OS)                       | Time from randomisation until death from any cause. For surviving patients, censor date 1 is used; if ONS data is available use censor date 2.                                                                                                                                                                                                                                                                                                                                                                                                                                                |
| Failure-free Survival (FFS)                 | Time from randomisation until the first of the following events: <ul style="list-style-type: none"> <li>• Biochemical failure</li> <li>• Local progression</li> <li>• Lymph node progression</li> <li>• Distant metastases</li> <li>• Skeletal Related Event (where confirmed disease progression)</li> <li>• Death from prostate cancer</li> </ul> For patients who have not had an event, censor date 3 is used (see below).<br>If a suspected event is reported for any of: local progression, lymph node progression, distant metastases progression this will be counted as a FFS event. |
| Progression-free Survival (PFS)             | Time from randomisation until first of: <ul style="list-style-type: none"> <li>• Local progression</li> <li>• Lymph node progression</li> <li>• Distant metastases</li> <li>• Skeletal Related Event (where confirmed disease progression)</li> <li>• Death from prostate cancer</li> </ul> For patients who have not had an event, censor date 3 is used (see below).<br>If a suspected event is reported for any of: local progression, lymph node progression, distant metastases progression this will be counted as a PFS event.                                                         |
| Metastatic Progression-Free Survival (mPFS) | Time from randomisation until first of: <ul style="list-style-type: none"> <li>• Distant metastases</li> <li>• Skeletal Related Event (where confirmed disease progression)</li> <li>• Death from prostate cancer</li> </ul> For patients who have not had an event, censor date 3 is used (see below).<br>If a suspected event is reported for distant metastases progression this will be counted as an MPFS event                                                                                                                                                                          |
| Metastasis-Free Survival (MFS)              | Time from randomisation until first of: <ul style="list-style-type: none"> <li>• Radiologically-confirmed distant metastases</li> <li>• Death from any cause</li> </ul> For patients who have not had an event, censor date 3 is used (see below).                                                                                                                                                                                                                                                                                                                                            |
| Skeletal Related Event (SRE)                | <ul style="list-style-type: none"> <li>• Bone pain requiring radiotherapy and/or surgery</li> <li>• Pathological fracture with or without disease progression at that cancer site</li> <li>• Metastatic spinal cord compression</li> </ul>                                                                                                                                                                                                                                                                                                                                                    |
| Disease-specific survival                   | Time from randomisation until death from prostate cancer (see below).<br>For patients who have not had an event, censor date 1 is used; if ONS data is available use censor date 2 (see below).                                                                                                                                                                                                                                                                                                                                                                                               |

| TERM                       | DEFINITION                                                                                                                                                                                                                                                                                                                                                                                                                                                                                                                                                                                                                                                                                                                                                                                                                                                                                                                                                                                                                                                                                                                                                                                                                                                                                                                                                                                                                                                                                                                                                                                                                                                                                                                                                                                                                                                                                                                                                                                                                                                                                                                                                                                                                                                                                                                                                                                                                                                                                                                                                                                                                                                                                                                                                                                                                                                                                                                                                                                                                                                                                                            |             |  |             |   |                                                                                                                                               |     |   |                                                                                                           |     |   |                                                                                                                    |     |   |                                                                                                                |     |   |                                                                                |     |   |                                                                                                                                                                     |     |   |                                                                                |         |   |                                                                                              |         |   |                                                                                                                                                         |         |
|----------------------------|-----------------------------------------------------------------------------------------------------------------------------------------------------------------------------------------------------------------------------------------------------------------------------------------------------------------------------------------------------------------------------------------------------------------------------------------------------------------------------------------------------------------------------------------------------------------------------------------------------------------------------------------------------------------------------------------------------------------------------------------------------------------------------------------------------------------------------------------------------------------------------------------------------------------------------------------------------------------------------------------------------------------------------------------------------------------------------------------------------------------------------------------------------------------------------------------------------------------------------------------------------------------------------------------------------------------------------------------------------------------------------------------------------------------------------------------------------------------------------------------------------------------------------------------------------------------------------------------------------------------------------------------------------------------------------------------------------------------------------------------------------------------------------------------------------------------------------------------------------------------------------------------------------------------------------------------------------------------------------------------------------------------------------------------------------------------------------------------------------------------------------------------------------------------------------------------------------------------------------------------------------------------------------------------------------------------------------------------------------------------------------------------------------------------------------------------------------------------------------------------------------------------------------------------------------------------------------------------------------------------------------------------------------------------------------------------------------------------------------------------------------------------------------------------------------------------------------------------------------------------------------------------------------------------------------------------------------------------------------------------------------------------------------------------------------------------------------------------------------------------------|-------------|--|-------------|---|-----------------------------------------------------------------------------------------------------------------------------------------------|-----|---|-----------------------------------------------------------------------------------------------------------|-----|---|--------------------------------------------------------------------------------------------------------------------|-----|---|----------------------------------------------------------------------------------------------------------------|-----|---|--------------------------------------------------------------------------------|-----|---|---------------------------------------------------------------------------------------------------------------------------------------------------------------------|-----|---|--------------------------------------------------------------------------------|---------|---|----------------------------------------------------------------------------------------------|---------|---|---------------------------------------------------------------------------------------------------------------------------------------------------------|---------|
| Death from prostate cancer | <p>All deaths are reviewed following the death review process<sup>11</sup>. A Statistician runs and maintains the Stata program to automatically assign either PCa or non-PCa as a cause of death with the following rules:</p> <table border="1" data-bbox="376 324 1447 947"> <thead> <tr> <th data-bbox="376 324 427 353">Rule</th> <th data-bbox="427 324 1254 353"></th> <th data-bbox="1254 324 1447 353">Cause death</th> </tr> </thead> <tbody> <tr> <td data-bbox="376 353 427 416">1</td> <td data-bbox="427 353 1254 416">Primary cause of death is PCa and no secondary causes are reported; progression event prior to death; no evidence of another cancer as an SAE</td> <td data-bbox="1254 353 1447 416">PCa</td> </tr> <tr> <td data-bbox="376 416 427 479">2</td> <td data-bbox="427 416 1254 479">Primary cause of death is pneumonia and secondary cause of death is PCa; progression event prior to death</td> <td data-bbox="1254 416 1447 479">PCa</td> </tr> <tr> <td data-bbox="376 479 427 542">3</td> <td data-bbox="427 479 1254 542">Primary cause of death is neutropenic sepsis and secondary cause of death is PCa; progression event prior to death</td> <td data-bbox="1254 479 1447 542">PCa</td> </tr> <tr> <td data-bbox="376 542 427 604">4</td> <td data-bbox="427 542 1254 604">Primary cause of death is carcinomatosis and secondary cause of death is PCa; progression event prior to death</td> <td data-bbox="1254 542 1447 604">PCa</td> </tr> <tr> <td data-bbox="376 604 427 667">5</td> <td data-bbox="427 604 1254 667">Death is reported as caused by PCa treatment; progression event prior to death</td> <td data-bbox="1254 604 1447 667">PCa</td> </tr> <tr> <td data-bbox="376 667 427 741">8</td> <td data-bbox="427 667 1254 741">Site reports on Death CRF (version 13.0+) that responsible consultant considers death predominantly caused by PCa or protocol research / standard-of-care treatment</td> <td data-bbox="1254 667 1447 741">PCa</td> </tr> <tr> <td data-bbox="376 741 427 804">6</td> <td data-bbox="427 741 1254 804">Primary cause of death is other primary cancer, and is confirmed by SAE report</td> <td data-bbox="1254 741 1447 804">Non-PCa</td> </tr> <tr> <td data-bbox="376 804 427 866">7</td> <td data-bbox="427 804 1254 866">Primary cause of death is cardiovascular disease; PCa not listed as secondary cause of death</td> <td data-bbox="1254 804 1447 866">Non-PCa</td> </tr> <tr> <td data-bbox="376 866 427 947">9</td> <td data-bbox="427 866 1254 947">Site reports on Death CRF (version 13.0+) that responsible consultant considers death predominantly caused by cardiovascular disease or other condition</td> <td data-bbox="1254 866 1447 947">Non-PCa</td> </tr> </tbody> </table> <p>Any patients that cannot be classified by these rules will be reviewed by a clinician. Further information will be sought where there is insufficient information for the reviewer(s) to make a judgement. Where the review is not completed for any reason, the local investigator's opinion will be taken.</p> | Rule        |  | Cause death | 1 | Primary cause of death is PCa and no secondary causes are reported; progression event prior to death; no evidence of another cancer as an SAE | PCa | 2 | Primary cause of death is pneumonia and secondary cause of death is PCa; progression event prior to death | PCa | 3 | Primary cause of death is neutropenic sepsis and secondary cause of death is PCa; progression event prior to death | PCa | 4 | Primary cause of death is carcinomatosis and secondary cause of death is PCa; progression event prior to death | PCa | 5 | Death is reported as caused by PCa treatment; progression event prior to death | PCa | 8 | Site reports on Death CRF (version 13.0+) that responsible consultant considers death predominantly caused by PCa or protocol research / standard-of-care treatment | PCa | 6 | Primary cause of death is other primary cancer, and is confirmed by SAE report | Non-PCa | 7 | Primary cause of death is cardiovascular disease; PCa not listed as secondary cause of death | Non-PCa | 9 | Site reports on Death CRF (version 13.0+) that responsible consultant considers death predominantly caused by cardiovascular disease or other condition | Non-PCa |
| Rule                       |                                                                                                                                                                                                                                                                                                                                                                                                                                                                                                                                                                                                                                                                                                                                                                                                                                                                                                                                                                                                                                                                                                                                                                                                                                                                                                                                                                                                                                                                                                                                                                                                                                                                                                                                                                                                                                                                                                                                                                                                                                                                                                                                                                                                                                                                                                                                                                                                                                                                                                                                                                                                                                                                                                                                                                                                                                                                                                                                                                                                                                                                                                                       | Cause death |  |             |   |                                                                                                                                               |     |   |                                                                                                           |     |   |                                                                                                                    |     |   |                                                                                                                |     |   |                                                                                |     |   |                                                                                                                                                                     |     |   |                                                                                |         |   |                                                                                              |         |   |                                                                                                                                                         |         |
| 1                          | Primary cause of death is PCa and no secondary causes are reported; progression event prior to death; no evidence of another cancer as an SAE                                                                                                                                                                                                                                                                                                                                                                                                                                                                                                                                                                                                                                                                                                                                                                                                                                                                                                                                                                                                                                                                                                                                                                                                                                                                                                                                                                                                                                                                                                                                                                                                                                                                                                                                                                                                                                                                                                                                                                                                                                                                                                                                                                                                                                                                                                                                                                                                                                                                                                                                                                                                                                                                                                                                                                                                                                                                                                                                                                         | PCa         |  |             |   |                                                                                                                                               |     |   |                                                                                                           |     |   |                                                                                                                    |     |   |                                                                                                                |     |   |                                                                                |     |   |                                                                                                                                                                     |     |   |                                                                                |         |   |                                                                                              |         |   |                                                                                                                                                         |         |
| 2                          | Primary cause of death is pneumonia and secondary cause of death is PCa; progression event prior to death                                                                                                                                                                                                                                                                                                                                                                                                                                                                                                                                                                                                                                                                                                                                                                                                                                                                                                                                                                                                                                                                                                                                                                                                                                                                                                                                                                                                                                                                                                                                                                                                                                                                                                                                                                                                                                                                                                                                                                                                                                                                                                                                                                                                                                                                                                                                                                                                                                                                                                                                                                                                                                                                                                                                                                                                                                                                                                                                                                                                             | PCa         |  |             |   |                                                                                                                                               |     |   |                                                                                                           |     |   |                                                                                                                    |     |   |                                                                                                                |     |   |                                                                                |     |   |                                                                                                                                                                     |     |   |                                                                                |         |   |                                                                                              |         |   |                                                                                                                                                         |         |
| 3                          | Primary cause of death is neutropenic sepsis and secondary cause of death is PCa; progression event prior to death                                                                                                                                                                                                                                                                                                                                                                                                                                                                                                                                                                                                                                                                                                                                                                                                                                                                                                                                                                                                                                                                                                                                                                                                                                                                                                                                                                                                                                                                                                                                                                                                                                                                                                                                                                                                                                                                                                                                                                                                                                                                                                                                                                                                                                                                                                                                                                                                                                                                                                                                                                                                                                                                                                                                                                                                                                                                                                                                                                                                    | PCa         |  |             |   |                                                                                                                                               |     |   |                                                                                                           |     |   |                                                                                                                    |     |   |                                                                                                                |     |   |                                                                                |     |   |                                                                                                                                                                     |     |   |                                                                                |         |   |                                                                                              |         |   |                                                                                                                                                         |         |
| 4                          | Primary cause of death is carcinomatosis and secondary cause of death is PCa; progression event prior to death                                                                                                                                                                                                                                                                                                                                                                                                                                                                                                                                                                                                                                                                                                                                                                                                                                                                                                                                                                                                                                                                                                                                                                                                                                                                                                                                                                                                                                                                                                                                                                                                                                                                                                                                                                                                                                                                                                                                                                                                                                                                                                                                                                                                                                                                                                                                                                                                                                                                                                                                                                                                                                                                                                                                                                                                                                                                                                                                                                                                        | PCa         |  |             |   |                                                                                                                                               |     |   |                                                                                                           |     |   |                                                                                                                    |     |   |                                                                                                                |     |   |                                                                                |     |   |                                                                                                                                                                     |     |   |                                                                                |         |   |                                                                                              |         |   |                                                                                                                                                         |         |
| 5                          | Death is reported as caused by PCa treatment; progression event prior to death                                                                                                                                                                                                                                                                                                                                                                                                                                                                                                                                                                                                                                                                                                                                                                                                                                                                                                                                                                                                                                                                                                                                                                                                                                                                                                                                                                                                                                                                                                                                                                                                                                                                                                                                                                                                                                                                                                                                                                                                                                                                                                                                                                                                                                                                                                                                                                                                                                                                                                                                                                                                                                                                                                                                                                                                                                                                                                                                                                                                                                        | PCa         |  |             |   |                                                                                                                                               |     |   |                                                                                                           |     |   |                                                                                                                    |     |   |                                                                                                                |     |   |                                                                                |     |   |                                                                                                                                                                     |     |   |                                                                                |         |   |                                                                                              |         |   |                                                                                                                                                         |         |
| 8                          | Site reports on Death CRF (version 13.0+) that responsible consultant considers death predominantly caused by PCa or protocol research / standard-of-care treatment                                                                                                                                                                                                                                                                                                                                                                                                                                                                                                                                                                                                                                                                                                                                                                                                                                                                                                                                                                                                                                                                                                                                                                                                                                                                                                                                                                                                                                                                                                                                                                                                                                                                                                                                                                                                                                                                                                                                                                                                                                                                                                                                                                                                                                                                                                                                                                                                                                                                                                                                                                                                                                                                                                                                                                                                                                                                                                                                                   | PCa         |  |             |   |                                                                                                                                               |     |   |                                                                                                           |     |   |                                                                                                                    |     |   |                                                                                                                |     |   |                                                                                |     |   |                                                                                                                                                                     |     |   |                                                                                |         |   |                                                                                              |         |   |                                                                                                                                                         |         |
| 6                          | Primary cause of death is other primary cancer, and is confirmed by SAE report                                                                                                                                                                                                                                                                                                                                                                                                                                                                                                                                                                                                                                                                                                                                                                                                                                                                                                                                                                                                                                                                                                                                                                                                                                                                                                                                                                                                                                                                                                                                                                                                                                                                                                                                                                                                                                                                                                                                                                                                                                                                                                                                                                                                                                                                                                                                                                                                                                                                                                                                                                                                                                                                                                                                                                                                                                                                                                                                                                                                                                        | Non-PCa     |  |             |   |                                                                                                                                               |     |   |                                                                                                           |     |   |                                                                                                                    |     |   |                                                                                                                |     |   |                                                                                |     |   |                                                                                                                                                                     |     |   |                                                                                |         |   |                                                                                              |         |   |                                                                                                                                                         |         |
| 7                          | Primary cause of death is cardiovascular disease; PCa not listed as secondary cause of death                                                                                                                                                                                                                                                                                                                                                                                                                                                                                                                                                                                                                                                                                                                                                                                                                                                                                                                                                                                                                                                                                                                                                                                                                                                                                                                                                                                                                                                                                                                                                                                                                                                                                                                                                                                                                                                                                                                                                                                                                                                                                                                                                                                                                                                                                                                                                                                                                                                                                                                                                                                                                                                                                                                                                                                                                                                                                                                                                                                                                          | Non-PCa     |  |             |   |                                                                                                                                               |     |   |                                                                                                           |     |   |                                                                                                                    |     |   |                                                                                                                |     |   |                                                                                |     |   |                                                                                                                                                                     |     |   |                                                                                |         |   |                                                                                              |         |   |                                                                                                                                                         |         |
| 9                          | Site reports on Death CRF (version 13.0+) that responsible consultant considers death predominantly caused by cardiovascular disease or other condition                                                                                                                                                                                                                                                                                                                                                                                                                                                                                                                                                                                                                                                                                                                                                                                                                                                                                                                                                                                                                                                                                                                                                                                                                                                                                                                                                                                                                                                                                                                                                                                                                                                                                                                                                                                                                                                                                                                                                                                                                                                                                                                                                                                                                                                                                                                                                                                                                                                                                                                                                                                                                                                                                                                                                                                                                                                                                                                                                               | Non-PCa     |  |             |   |                                                                                                                                               |     |   |                                                                                                           |     |   |                                                                                                                    |     |   |                                                                                                                |     |   |                                                                                |     |   |                                                                                                                                                                     |     |   |                                                                                |         |   |                                                                                              |         |   |                                                                                                                                                         |         |
| Censor date 1 for OS       | <p>Date taken from the latest of the relevant variables defined below:</p> <ul style="list-style-type: none"> <li>• Date of randomisation (Form 1)</li> <li>• BMD assessment date (scan, blood sample, urine sample)</li> <li>• Date of treatment cycle (as taken from the bisphosphonate, docetaxel; Forms 4, 5, 6)</li> <li>• Date bloods taken (as taken from the bisphosphonate Forms 4, 5)</li> <li>• Date of last SOC docetaxel cycle (Form 21)</li> <li>• Date of any treatment action (Forms 7, 7B, 7C, 7D)</li> <li>• Date of any tE2 treatment action for Arm L patients (Form 25)</li> <li>• Date of tests recorded on hormone results log for Arm L patients (Form 24)</li> <li>• Dates reported on the Follow-up CRF (including date of PSA tests, date of any surgical interventions, date of any SRE, date of any metabolic or cardiovascular event; Forms 7, 7A)</li> <li>• Date of any reported progression event (Form 8)</li> <li>• Date additional treatment started or stopped (Forms 8, 8A)</li> <li>• Date of first/last RT fraction (Form 9A)</li> <li>• Date of late RT toxicity assessment (Form 10)</li> <li>• Date HT/research treatment ended (Form 11)</li> <li>• SAE date (onset, resolved, recent HT or trial treatment administration, start/end date of other treatment, test date) (Form 14)</li> <li>• Date of palliative RT fraction (Form 19)</li> <li>• Date blood or saliva sample obtained as reported on the pathology form (Form 18)</li> <li>• Date of co-enrolment to another trial (Form 15)</li> <li>• Date trial participation ended (Form 20)</li> <li>• Date last known alive (Form 7 from Version 13.0)</li> <li>• Date of death (Censoring date only for outcomes other than overall survival and disease-specific survival; Form 12)</li> </ul> <p><b>Notes:</b></p>                                                                                                                                                                                                                                                                                                                                                                                                                                                                                                                                                                                                                                                                                                                                                                                                                                                                                                                                                                                                                                                                                                                                                                                                                                                                                             |             |  |             |   |                                                                                                                                               |     |   |                                                                                                           |     |   |                                                                                                                    |     |   |                                                                                                                |     |   |                                                                                |     |   |                                                                                                                                                                     |     |   |                                                                                |         |   |                                                                                              |         |   |                                                                                                                                                         |         |

<sup>11</sup> : S:\MRCCTU\_Stampede\_Stats\Data\Death Review\

| TERM                                      | DEFINITION                                                                                                                                                                                                                                                                                                                                                                                                                                                                                                                                                    |
|-------------------------------------------|---------------------------------------------------------------------------------------------------------------------------------------------------------------------------------------------------------------------------------------------------------------------------------------------------------------------------------------------------------------------------------------------------------------------------------------------------------------------------------------------------------------------------------------------------------------|
|                                           | <ul style="list-style-type: none"> <li>• Dates from the QoL forms are no longer used as a censor date as these are completed by the patient and cannot be queried for errors.</li> <li>• Dates of form completion are no longer used as the CRF may have been completed retrospectively.</li> <li>• Any date pre-randomisation is ignored within the calculation.</li> </ul> <p>Unusual dates which have not yet been resolved or dates after the date of the corresponding data freeze will be ignored for the purposes of calculating this censor date.</p> |
| Censor date 2 for OS                      | For patients with successful flagging with ONS (or equivalent) a censoring date will be set as 4 or 8 weeks before the ONS data transfer                                                                                                                                                                                                                                                                                                                                                                                                                      |
| Censor date 3 for non-OS outcome measures | <p>Date taken from the latest of the relevant variables defined below:</p> <ul style="list-style-type: none"> <li>• Date of randomisation (Form 1)</li> <li>• Date of assessment on the Follow-up CRF (unless recorded as a missed visit; Form 7)</li> <li>• Date of any reported progression event (If type of progression not included as event; Form 8)</li> </ul>                                                                                                                                                                                         |

## 5 SAMPLE SIZE CALCULATIONS

### 5.1 SAMPLE SIZE

This comparison includes patients allocated to research Arm J and all patients contemporaneously allocated to the control Arm A who meet the eligibility criteria for the research treatment. The sample size calculations were performed using the latest update of `nstage` available at the time, with an allocation ratio of 1:1.

This comparison was added in Jul-2014 and was designed under similar assumptions as the original research comparisons; however a smaller HR for the intermediate outcome measure of 0.70 was targeted with only 2 pre-planned activity analyses.

Consideration was given to ceasing further randomisations to Arm J if it was not showing sufficient evidence of activity on the intermediate primary outcome measure (FFS), just as for the other research arms.

The patient mix for this comparison is likely to represent a more favourable prognosis on average than in earlier comparisons, due to concurrent recruitment of M1 but not M0 patients to Arm H (resulting in a lower proportion of M1 patients in the "enzalutamide + abiraterone comparison").

We anticipated that around 1,800 patients needed to be recruited within 3.5 years to observe ~269 control arm deaths within 6 years. For our target HR of 0.75 for SOC+enzalutamide+abiraterone vs SOC alone on OS this would give 90% power to detect a treatment difference of this magnitude with a one-sided significance level of 2.5%. The timing of the definitive analysis will be partly dependent on the observed overall survival. The default scenario assumed that (i) recruitment is constantly 70pts/m to the trial overall, (ii) the M1|RT Arm H accrues throughout and (iii) a further new research arm with an equal allocation ratio is introduced 18 months after activation of Arm J.

Note that these sample size calculations have been superseded by the new analysis plan set out for M0 patients in Appendix A but are presented for completeness and transparency.

### 5.2 SAMPLE SIZE FOR INTERMEDIATE ANALYSES

Intermediate analyses will be collated and reported to the IDMC. Data will be released to the TSC if required and on to the TMG if deemed appropriate. Not all comparisons will be featured in every intermediate reporting, depending on the stage of the trial, the need for the analysis and time pressures.

Table 5 gives details of the intermediate analyses for all research comparisons.

**Table 5: Intermediate and Final Activity Stage Analyses – Targeted vs Observed events**

| RESEARCH COMPARISON              | AS# | CONTROL ARM EVENTS |          | IDMC / MAIN REPORT | IDMC RECOMMENDATION      |
|----------------------------------|-----|--------------------|----------|--------------------|--------------------------|
|                                  |     | TARGET             | OBSERVED |                    |                          |
| Original (Arms B-F)              | 1   | 113 FFS            | 129 FFS  | 30-Mar-2010        | Continue as planned      |
|                                  | 2   | 216 FFS            | 209 FFS  | 31-Mar-2011        | Stop accrual to arms D&F |
|                                  | 3   | 334 FFS            | 341 FFS  | 30-May-2012        | Continue as planned      |
|                                  | 4   | 404 OS             | 415 OS   | 13-May-2015        | Main report              |
| Abiraterone (Arm G)              | 1   | 75 FFS             | 88 FFS   | 30-Aug-2013        | Continue as planned      |
|                                  | 2   | 142 FFS            | 162 FFS  | 07-Feb-2014        | Continue as planned      |
|                                  | 3   | 221 FFS            | 241 FFS  | 06-Jun-2014        | Continue as planned      |
|                                  | 4   | 267 OS             | 262 OS   | 10-Feb-2017        | Main report              |
| M1 RT (Arm H)                    | 1   | 75 FFS             | 69 FFS   | 06-Jun-2014        | Continue as planned      |
|                                  | 2   | 142 FFS            | 144 FFS  | 21-Nov-2014        | Continue as planned      |
|                                  | 3   | 221 FFS            | 255 FFS  | 13-May-2015        | Continue as planned      |
|                                  | 4   | 267 OS             | TBD OS   | Q2/3-2018          | Main report              |
| Enzalutamide+abiraterone (Arm J) | 1   | 66 FFS             | 85 FFS   | 05-Nov-2015        | Continue as planned      |
|                                  | 2   | 139 FFS            | 136 FFS  | 22-Mar-2016        | Continue as planned      |
|                                  | 3   | 269 OS             | 345 OS   | 21-Jun-2021        | Main report              |
| Metformin (Arm K)                | 1   | 121 OS*            | TBD OS*  | TBD                | TBD                      |
|                                  | 2   | 473 OS*            | TBD OS*  | TBD                | Main report              |

\* Events in M1 patients only

### 5.3 FURTHER DETAILS IN SAMPLE SIZE CALCULATIONS AND DESIGN

For further details relating to the sample size calculations and design for each research comparison, see the Statistical Design Document. All do-files, Stata logs, and related presentations can be found within the relevant section of the Statistical Master File.

## 6 STATISTICAL ANALYSIS

The results of the analyses will be reported following the principle of the ICH E3 guidelines on the Structure and Content of Clinical Study Reports.<sup>12</sup>

### 6.1 TIME PERIODS

The main analysis for all comparisons using Cox PH models will be stratified by each time period when the choice of treatment allocations at randomisation within STAMPEDE was changed, or another fundamental aspect which may affect the patient population being randomised. As of Jun-2017, there are eleven time-defined strata (see Table 6 and Figure 3 below). The main analysis of the enzalutamide + abiraterone comparison includes periods 7 and 8.

**Table 6: Time periods within STAMPEDE**

| TIME PERIOD | DEFINITION                                                                                               | ACCRUAL     |              | CO-RECRUITING RESEARCH ARMS |
|-------------|----------------------------------------------------------------------------------------------------------|-------------|--------------|-----------------------------|
|             |                                                                                                          | START DATE  | END DATE     |                             |
| 1           | From the start of the trial up to the stopping of the celecoxib-containing research Arms D & F           | 05-Oct-2005 | 06-Apr-2011  | B C D E F                   |
| 2           | Post-closure of Arms D & F up to the opening of the abiraterone research Arm G                           | 06-Apr-2011 | 14-Nov-2011  | B C E                       |
| 3           | Post-opening of Arm G up to the opening of the M1 radiotherapy research Arm H                            | 15-Nov-2011 | 21-Jan-2013  | B C E G                     |
| 4           | Post-opening of Arm H up to the closure of the remaining original research Arms B, C & E                 | 22-Jan-2013 | 31-Mar-2013  | B C E G H                   |
| 5           | Post-closure of Arms B, C & E up to the closure of abiraterone research Arm G                            | 01-Apr-2013 | 17-Jan-2014* | G H                         |
| 6           | Post-closure of Arm G up to the opening of the enzalutamide+abiraterone research Arm J                   | 18-Jan-2014 | 28-Jul-2014  | H                           |
| 7           | Post-opening of Arm J up to the update in SOC to permit planned use of docetaxel as first line treatment | 29-Jul-2014 | 16-Dec-2015  | H J                         |
| 8           | Post-update of SOC up to the closure of enzalutamide+abiraterone research Arm J                          | 17-Dec-2015 | 31-Mar-2016  | H J                         |
| 9           | Post closure of Arm J up to the close of M1 RT research Arm H and opening of metformin research Arm K    | 01-Apr-2016 | 02-Sep-2016  | H                           |
| 10          | Post-opening of Arm K to the opening of transdermal oestradiol research arm L                            | 03-Sep-2016 | 19-Jun-2017  | K                           |
| 11          | Post-opening of Arm L onwards                                                                            | 20-Jun-2017 | TBD          | K L                         |

\*Note: One patient was manually randomised to Arm G after the cut-off of 17-Jan-2014

<sup>12</sup> [http://www.ich.org/fileadmin/Public\\_Web\\_Site/ICH\\_Products/Guidelines/Efficacy/E3/E3\\_Guideline.pdf](http://www.ich.org/fileadmin/Public_Web_Site/ICH_Products/Guidelines/Efficacy/E3/E3_Guideline.pdf)

**Figure 3: Arms active over time (time strata)**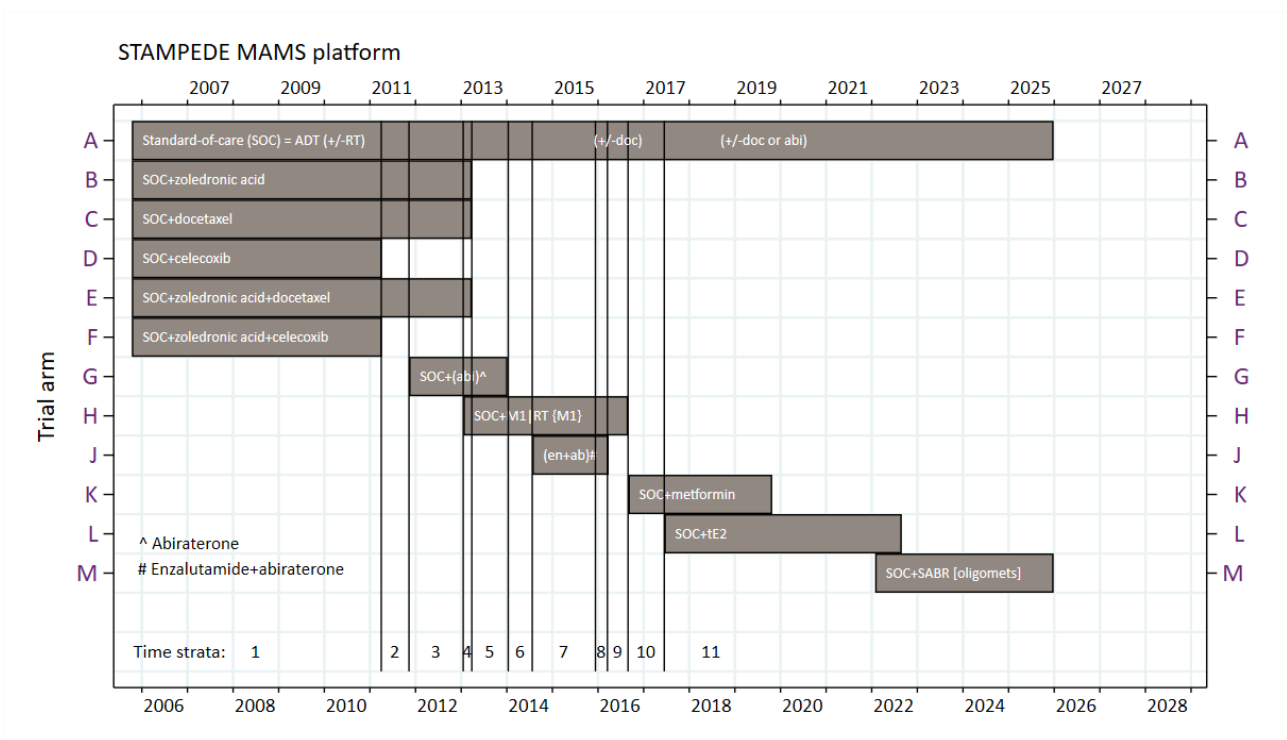

## 6.2 POPULATIONS FOR ANALYSIS

We define two populations for analysis; the intention-to-treat population and the safety population. The ITT population will be used for all analyses unless specified. The safety population will be included in analyses of adverse events, toxicity and other safety data (safety analyses).

### Intention-to-treat (ITT) population

- Comprised of all randomised patients, whether or not they actually received the allocated trial treatment.
- In ITT analyses by treatment arm, patients will be included in the treatment arm to which they were randomised.

### Safety population

- Comprised of patients who have been administered at least one dose of their allocated trial treatment.
- Patients will be classed as having started trial treatment if they report a treatment start date, report an SAE which is treatment related, or report death as being within 4 weeks of trial treatment (& related to trial treatment)
- In safety population analyses, patients will be included in the treatment arm corresponding to the treatment they actually started; for example, an Arm G or J patient not starting abiraterone or enzalutamide will be excluded from the analysis.

For visual illustration, a CONSORT flow diagram will clearly identify any patients found to be ineligible post-randomisation or stopping trial follow-up early; these patients will be included in relevant analyses where possible. For reference, a template flow diagram can be found in S:\MRCCTU\_Stampede\_Stats\SAP.

## 6.3 RECRUITMENT AND PATIENT FLOW

### 6.3.1 RECRUITMENT

- Graph of observed recruitment to the relevant comparison
- Table of recruitment by year & centre
- Table of recruitment across relevant time strata, by treatment arm

### 6.3.2 PATIENT FLOW THROUGH THE TRIAL

The flow of patients through the trial during the time the relevant comparison was recruited will be presented in a CONSORT diagram that also presents the ITT and safety populations (see section 6.2).

## 6.4 BASELINE CHARACTERISTICS

The following baseline characteristics will be presented, broken down by treatment arm unless otherwise stated, either as n (%) or median (IQR; min-max) as applicable. Any imbalances between the arms will be assessed using  $\chi^2$  or Fishers Exact tests for categorical data and t-tests or Mann-Whitney U tests for continuous data.

- All stratification factors (see section 2.4)
- Randomisation CRF data:
  - Age at randomisation (years)
  - PSA at randomisation (ng/ml; defined as PSA pre-HT)
  - Ln (PSA) at randomisation (defined as Ln (PSA) pre-HT)
  - Time from diagnosis to randomisation (days)
  - Pain from prostate cancer at randomisation: Absent; Present
  - Broad disease category: N0M0 new; N+M0 new; M1 new; Local treatment now relapsing
  - T-stage at randomisation
  - N-stage at randomisation
  - Any metastases at randomisation
  - Bone metastases at randomisation
  - Liver metastases at randomisation
  - Lung metastases at randomisation
  - Nodal metastases at randomisation
  - Other metastases at randomisation
  - Metastatic volume (when available)
  - Use of aspirin
  - Use of NSAIDs Use of short-term bisphosphonates (subgroup: broad disease category)



- Planned type of HT (randomisation CRF; subgroup: broad disease category)
- Planned use of long-term anti-androgens
- Planned use of radiotherapy (subgroup: nodal & metastatic status)
- Cumulative randomisations (subgroup: nodal, metastatic & planned RT status)
- Participation in QL study
- Time from randomisation to starting current HT (times negative if pt starts HT pre-randomisation)
- Previous HT type: None; LHRH (agonist or antagonist if known); AAs alone; DAB
- Previous local therapy type (if known): None; radical prostatectomy; radical radiotherapy; radical prostatectomy with post-operative radical radiotherapy; other
- Duration of previous HT (days)
- Months between end of previous HT and randomisation (subgroup: broad disease category)
- Baseline CRF data:
  - Gleason sum score at presentation
  - T-stage at presentation
  - N-stage at presentation
  - M-stage at presentation
  - PSA at first presentation (ng/ml)
  - Ln(PSA) at first presentation
  - Concomitant medications (to be clinically recoded)
- Cardiovascular assessment data
  - Smoking status (subgroup: broad disease category)
  - Diabetes and type (subgroup: broad disease category)
  - History of MI, CV disease, CHF, angina or hypertension (subgroup: broad disease category)

## 6.5 STANDARD OF CARE TREATMENT

For all standard-of-care treatments the following data will be presented, broken down by treatment arm:

- Hormone therapy details (from the FU CRF, HT CRF or the HT Log)
  - Numbers reporting treatment action of changing or stopping (N, %)
  - Time to treatment action
  - Reason for treatment action
- Docetaxel treatment details (from the SOC Docetaxel Treatment CRF; planned details from Randomisation CRF)
  - Reported vs planned docetaxel
  - Time from randomisation to first cycle of docetaxel (days)
  - Time from starting ADT to first cycle of docetaxel (days)
  - Number of cycles administered
  - Reason for less than 6 cycles
  - Daily steroid formulation

- Daily steroid dose
- Radiotherapy treatment details (from the RT detail CRF; planned details from the Randomisation CRF)
  - Reported vs planned use of RT
  - Timing from randomisation to first fraction of RT in:
    - All patients
    - Patients planned for RT
    - NOM0 patients
    - N+M0 patients

## 6.6 TRIAL TREATMENT

For **abiraterone** and **enzalutamide** research treatment data the following analyses are planned:

- Number of patients starting allocated trial treatment (N, %)
- Details of patients confirmed as not starting allocated trial treatment (as reported on the End of Research Treatment CRF)
- Time from randomisation to start of treatment (in all pts; censor those who don't report starting)
- Starting dose
- Number of treatments administered (where multiple allocated; i.e. Arm J enzalutamide + abiraterone)
- Treatment compliance/tolerance
  - Numbers reporting treatment action of changing or pausing or restarting (N, %)
  - Time to treatment action (only in pts who report starting)
  - Reason for treatment action (including associated toxicity details if relevant)
  - Length of each treatment break
  - Proportion of missed days
- Frequency and reason for dose modification and delays, treatment termination
  - Include detail of any protocol deviations in relation to overdoses.
- Permanent cessation of trial treatment (as reported on the End of Research Treatment CRF)
  - Numbers (N, %)
  - Time from randomisation to stopping (Overall & subgroup: metastatic status)
    - Censor at randomisation if explicitly reported as not starting
    - Censor at last contact if reported as starting but no report of permanent stopping
  - Time from starting treatment to stopping in patients who report starting (Overall & subgroup: metastatic status)
    - Censor at last contact if reported as starting but no report of permanent stopping
  - Reason (including associated toxicity details if relevant)

Plus

- Additional treatments given (as reported on the Additional Treatment CRF)
  - Include detail of any patients receiving non-protocol disease-directed interventions prior to study outcomes

## 6.7 SURVIVAL OUTCOME MEASURES

### 6.7.1 PRIMARY OUTCOME MEASURE

The primary outcome measure up to March 2021 was overall survival (see Table 4 for definition). From March 2021, for analyses where the M0 patients are analysed separately, the primary outcome measure for M0 patients will be metastasis-free-survival (MFS), see Table 4 for definition. This is based upon the ICECAP consortium recommendation that MFS is a suitable surrogate for overall survival in these patients. Overall survival remains the primary outcome measure for M1 patients.

The following data will be presented overall and split by metastatic status, if required:

- Incidence of death, by treatment arm
- Estimate of survival by year from randomisation, by treatment arm (% , 95% CI)
- Cause of death, by treatment arm (death form and death review process)
- Reported cause of death *vs* review cause of death
- Place of death, by treatment arm
- Death within 4 weeks of trial drug, by treatment arm
- Death related to trial treatment, by treatment arm
- Time from randomisation to death from any cause, by treatment arm
  - KM survival plot and median from FPM
  - Censor individuals at last contact if not died
- Comparisons of research vs control from Cox model
  - Adjusted for all stratification factors except centre and method of hormones; stratified by time period

### 6.7.2 SECONDARY OUTCOME MEASURES

For all secondary outcome measures the following analyses will be performed for the research comparison, overall and split by metastatic status, unless specified:

- Incidence of the outcome, by treatment arm
- Estimate of (*freedom from*) outcome by year from randomisation, by treatment arm (% , 95% CI)
- First reported progression event, by treatment arm [FFS only]
- Time from randomisation to outcome, by treatment arm
  - KM survival plot and median from FPM
  - Censor individuals at last contact if outcome not reported
- Comparisons of research vs control from Cox model adjusted for stratification factors (excluding centre and method of hormones); stratified by time period.

### 6.7.3 STATISTICAL ANALYSIS METHODS

Time-to-event data will be presented using Kaplan-Meier curves. Censoring dates will be used in all time-to-event analyses for patients who have not experienced the event in question (e.g. progression, death), as defined in Table 4. For KM plots, all patients randomised to the comparison being analysed will be included. Those patients

who have no reported event and contribute no information, such that they are censored at the date of randomisation, will be censored with a time of 0.1 days.

The HR will be analysed using a Cox proportional hazards model, adjusted for those stratification factors used at randomisation (see section 2.4) except for centre and method of hormones, and stratified by the relevant time period/strata for when the comparison was recruiting (see Table 6). This adjusted estimate will be the primary analysis estimate of treatment effect.

Differences in time-to-event outcomes will be assessed using the log-rank  $\chi^2$  test and expressed using a hazard ratio (HR) with both a one-sided 97.5% confidence interval and also a 2-sided 95% confidence interval; where the design alpha differs from 0.025 the upper limit of the corresponding one-sided confidence interval will be presented (for example, for an alpha of 0.25 this would be the upper limit of a one-sided 75% confidence interval). The number of events observed and the log-rank expected number of events will be presented.

Alternative estimation of the treatment effect will use exploratory methods e.g. log-rank hazard ratio. Flexible parametric models, modelling the difference between treatment groups over time, will be fitted to the time-to-event data with and without including time-dependent treatment effects.

#### 6.7.4 PROPORTIONAL AND NON-PROPORTIONAL HAZARDS

The assumption of proportional-hazards (PH) will be tested on the basis of Schoenfeld residuals after fitting the Cox model. Application in Stata will be using the command `-estat phtest-` with evidence of non-PH between the two treatment groups being the main focus. Appropriate methods will be applied to the data in the case of any violation and presented alongside the primary analysis to aid interpretation; see details below.

If there is no evidence of non-PH in the treatment effect, the HR for the adjusted Cox model takes primacy.

If there is evidence of non-PH in the treatment effect, the HRs can be difficult to interpret and the restricted mean survival time (RMST) (or "restricted mean time-to-event time") difference constructed from a flexible parametric model with time-varying treatment effect will take primacy. This analysis will use a flexible parametric model, adjusted for the stratification factors used at randomisation (except for centre and method of hormones) and relevant time strata, to determine the time-dependent treatment effect and then predict values needed for subsequent RMST analysis. The application of this methodology will be particularly useful in the case where there is adequate evidence that the proportional hazard assumptions are violated at the 5% level (i.e.  $P < 0.05$ ). Application in Stata will be using the command `-strmst-`.

RMST will be calculated and reported for the main treatment effects regardless of whether the PH assumption is violated, as this is recognised as a useful measure. The time within which RMST will be determined by the timing of events in the control arm (using the command `-maturity_rmst-` in Stata). For this purpose,  $t^*$  (the time up to when we want to compute the outcome measure of RMST) will be defined as the maximum available follow-up time (if clinically meaningful) where there is most power for the analysis, or a suitable salient time point otherwise, for the research comparison of interest at the time of the analysis.

### 6.7.5 COMPETING RISKS

Analysis of those outcomes where there are considered to be competing risks will be performed by fitting an adjusted Cox model as well as a competing risks regression model, with a competing risk defined as any event the patient would likely have experienced had they not experienced the outcome of interest first. To date, outcomes with competing risks are FFS, PFS, mPFS, SRE and disease-specific survival where the competing risk is death from non-PCa cause.

### 6.7.7 PATIENTS WITH NO DATA POST RANDOMISATION

All models used to estimate treatment effect will include those individuals with no reported outcome event and contributing no censoring information such that they are censored at their date of randomisation (t=0.1 days after randomisation).

### 6.7.8 WITHDRAWN PATIENTS WITH OUTCOME DATA

In May-2019 it was highlighted that a small number of patients who had withdrawn consent for further data collection had outcome data (e.g. death date) recorded in the database; as a result, they were included as events rather than censorings in analyses. To avoid this issue in future analyses, the code used to produce time-to-event and event indicator variables was updated. Any patients who withdraw consent for future data collection and for whom an outcome event has not been reported up to the date of withdrawal are now included as censored on the date of withdrawal in the relevant analysis (or earlier for non-OS outcomes, see Table 4).

### 6.7.9 SENSITIVITY ANALYSIS TO ASSESS IMPACT OF COVID-19 PANDEMIC

From March 2020, there was significant disruption to UK cancer services as a result of the COVID-19 pandemic. It is unclear whether this disruption had an impact on the ways in which patients were followed up or assessed for progressive disease. Therefore, for all analyses where it is considered possible that results could be affected by the pandemic, a sensitivity analysis will be undertaken where the administrative censoring date of 1<sup>st</sup> March 2020 is used as a truncation date. A visual (not statistical) comparison will be made between the point estimates from primary analyses that include and exclude data after this date and the numbers of events and censoring occurrences excluded will be summarised by randomised group.

## 6.8 PRE-SPECIFIED SUBGROUP ANALYSES

STAMPEDE recruits patients at high risk of dying from prostate cancer and who are starting long-term hormone therapy for the first time (hormone-naïve disease). This is a broad spectrum of patients including both men with metastases at randomisation and men without metastases, and men with de novo disease or disease relapsing after previous local therapy.

### 6.8.1 STRATIFICATION FACTORS USED FOR MINIMISATION

The stratification factors described in section 2.4 (apart from recruiting centre or hormone use) used for minimisation at the point of randomisation will form subgroups in which treatment effect will be assessed, with an interaction p-value of less than 0.1 used to suggest evidence of a potential difference in treatment effect across the relevant subgroups. As with all subgroups, we accept that there is limited power to detect an interaction and for analyses restricted to patients in a particular subgroup. The raised probability of a type 1 error from multiple testing will be acknowledged. As a result, these subgroup analyses will be regarded as exploratory.

### 6.8.2 OTHER PRE-SPECIFIED SUBGROUP ANALYSIS

#### 6.8.2.1 METASTATIC VOLUME AND RISK IN M1 PATIENTS

During the trial, interest has grown in estimating the "volume" of metastases, following analyses of docetaxel in CHARTED which divided its metastatic patients into "low volume" and "high volume" metastatic disease, and of abiraterone in LATITUDE which divided metastatic patients into "low risk" and "high risk", and only recruited the latter. Volume has been measured in A-G and is being measured in A-J using prospectively collected information on the presence of visceral metastases from the screening CRF and post-hoc review of the number of bone metastases using retrospectively collected baseline whole-body bone scintigraphy, CT and MRI scans. When available, subgroup analysis of treatment effect by volume and risk will be conducted. The following definitions will be used to classify patients into low and high volume for the purpose of this analysis:

High-volume disease: four or more bone metastases on bone scan, including one or more outside the vertebral bodies or pelvis, and/or visceral metastases

Low volume disease: Bone metastases on imaging as defined above not meeting high volume definition and no visceral metastases.

The following definition will be used to classify patients into high risk for the purpose of this analysis:

any two of the following: (1) three or more bone metastases on bone scan, (2) Gleason sum  $\geq 8$ , and (3) any visceral metastases.

Given that there may be an incomplete series of bone scans collected for volume assessment, and it is possible that scans will not be missing at random, subgroup analyses that combine the G and J comparisons will only be conducted by pooling the interaction HRs using deft meta-analysis methods (7).

## 6.9 PSA RESPONSE

PSA response data within the first 24 weeks on trial are used to determine a patient's biochemical progression category (see Protocol for details). Of interest is whether this differs by allocated treatment arm, therefore the following data should be presented by treatment arm on an intention-to-treat basis:

- Boxplot of Log of PSA nadir (to 24 weeks after randomisation)
  - Give data underpinning this including N, min, Q, Max, mean, SD
- Biochemical progression category, N (%)

## 6.10 TOXICITY AND SAFETY ANALYSES

Toxicity data will be reported using the NCI Common Toxicity Criteria for Adverse Events and presented in the **ITT populations for interim analysis reports and annual review reports** to the IDMC; however breakdown of safety/toxicity data should be presented in the **safety population for final analysis publication and reports**, with only headline figures shown for the ITT population to demonstrate comparability of the populations.

Data presented by treatment arm should be:

- KM plot of time to first G3-5 toxicity reported on the FU, Toxicity or SAE CRF; include maximum SAE grade
- Worst toxicity grade in any category (Overall & subgroup: metastatic status); in each category; proportion with grade 3-5, for the following time points/periods:
  - Within 6m from randomisation (up to and including week 30)
  - At 1 year (+/- 12 weeks)
  - At 2 years (+/- 12 weeks)
  - Ever on trial
- Time to first grade 3-5 SAE
- Time to any grade SAE
- Time to first grade 3-5 SAR
- Time to any grade SAR
- Time to first grade 3-5 SUSAR
- Time to any grade SUSAR
- Table of all reported SAEs reviewed as being related to treatment (classified as a SAR or SUSAR); table to include the following details ordered by trial arm and Patient ID:
  - Patient ID
  - Date of randomisation
  - Date of onset
  - Main diagnosis and associated symptom(s)
  - Grade (as determined by clinical reviewer; site-attributed grade used if not yet reviewed)
  - Why the event is serious
  - SAE status
  - Causal relationship to HT/trial drug; related? expected?
  - Reviewed relatedness; SAR or SUSAR

Safety analyses will be performed and presented on the safety population. All safety analyses will focus on adverse events experienced during treatment and up to 30 days after the end of research treatment (see Protocol).

Safety will be evaluated by tabulation of adverse events at or up to pre-defined follow-up time points. Adverse events will be classified using the NCI Common Toxicity Criteria for Adverse Events (CTCAE v4.03 for all assessments dated from Protocol v19.0 (26-Nov-2018) onwards; assessments made before this using CTCAE v3.0 and CTCAE v4.0 will be re-coded to fit with CTCAE v4.03) and summarised for each treatment arm. Reported grading is "0 = toxicity not experienced" up to "5 = fatal".

Adverse events (AEs) may be detected through several sources reported by sites on CRFs:

1. **Follow-up CRF** – routinely reported symptoms and "toxicities" (severity not seriousness reported)
  - AEs reported here up to Sep-2016.
2. **Toxicity CRF** – prompted reporting of symptoms and "toxicities" (severity not seriousness reported)
  - AEs reported here from Sep-2016 onwards.
  - Linked to routine follow-up visits, where sites are asked to report any toxicities experienced in the period covered by the follow-up assessment; and treatment actions and permanent stopping of treatment where toxicity is given as the reason for the action.
3. **SAE CRF** – spontaneously reported serious adverse events (severity and seriousness reported)

Not all serious events are severe nor are all severe events serious.

"Seriousness" is a term specific to the reporting of events to regulatory bodies. We have prioritised the consideration of "severity" for balancing evidence of treatment side-effects against activity data. SAE forms and follow-up forms both request the severity of events. Therefore, these sources can be merged to form one dataset for reporting the **severity** of toxicities experienced across different body systems specific disease categories. The focus of severity-reporting will be on toxicities with grade 3, 4 or 5 (fatal), however all toxicity grades will be reported for completeness.

For toxicity data reported **at** pre-specified set time points from randomisation (e.g. at one year since randomisation), this will be reported only for patients who have not progressed before the set time point; this is because for patients on either the control arm or research arms where trial treatment is to be stopped at progression, toxicity data is only expected up to the time of first reported progression. For patients on research arms where trial treatment can (and should) continue beyond first progression (i.e. beyond a first FFS event), namely current Arms G, J and K, an additional report of toxicity data at specific time points from randomisation will be presented only for research arm patients still on treatment at that time; this is because toxicity data for their contemporaneous control patients would not have toxicity collected after the FFS events. Reporting windows will be defined around these set time points which will be as close to the time of interest while accepting that clinical practice means that most patients will not be reviewed on a specific day. These windows are as follows:



- Toxicity at one year on trial: based on information provided for follow-up assessment or SAE report closest to a patient's 1-year anniversary of randomisation to the trial, within 12 weeks of this anniversary. Patients are included in the relevant cross-sectional analysis if progression / permanent treatment stopping has not been reported by 48 weeks since randomisation.
- Toxicity at two years on trial: based on information provided for follow-up assessment or SAE report closest to a patient's 2-year anniversary of randomisation, within 12 weeks of this anniversary. Patients are included in the relevant cross-sectional analysis if progression / permanent treatment stopping has not been reported by 96 weeks since randomisation.

For toxicity data reported **up to** pre-specified time points from randomisation this will include all patients with follow-up/toxicity/SAE data available within that time frame.

All patients receive ADT as standard-of-care and so interest will be in the additional toxicity reported for patients on research arm relative to control arm, compared informally. Interest will also be in any proportion of known treatment toxicity above that which is expected in this population.

"Relatedness" is only collected for SAEs and cannot be reported for all adverse events.

### 6.11 QUALITY-OF-LIFE ANALYSIS

Quality of life data will not be analysed as part of the primary analysis, but may be analysed separately at a later date. A separate SAP will be developed for such analyses.

### 6.12 HEALTH ECONOMICS

Health economic data will not be analysed as part of the primary analysis, but may be analysed separately at a later date. A separate SAP will be developed for such analyses.

## APPENDIX A – EXTENSION OF STATISTICAL ANALYSIS PLAN DESCRIBING THE COMBINED ANALYSES OF M0 AND M1 PATIENTS IN THE A-G AND A-J COMPARISONS

This appendix relates to a combined analysis of the patients recruited into either the Abiraterone (A-G) or Abiraterone + Enzalutamide (A-J) comparisons, separated by metastatic status. The appendix should be used in combination with the main J comparison statistical analysis plan that describes in more detail the methods for analysis of the whole comparison. The analysis for M0 patients was performed in August 2021 based on the requirement for the pre-defined number of events in the M0 control groups. Sections A1.2-A1.5 and the addendum are unchanged since July 2021. This appendix is being updated in March 2022 to describe the similar meta-analysis methods that will be employed to combine the M1 patients from the A-G and A-J comparisons. The timing of the M1 analysis was not dependent on pre-defined criteria but planned for after closure of the trial to collected of any further trial-related data.

Please note, in a small number of patients, the assessment of metastatic status at randomisation has changed based on subsequent testing and imaging such that the randomisation form becomes a more correct representation of the true metastatic status of the patient. For the purposes of separating M0 and M1 analyses, the data from the randomisation form (extracted from MACRO on 03-Aug-2021, rather than the randomisation server) will be used to select patients. The number of patients in whom this status changed will be described in any data report. It is acknowledged that the minimisation factors will differ slightly from the true status.

### A1.1 Recruitment and progress for A-G and A-J comparisons

Recruitment into the A-G (abiraterone) comparison commenced in Nov 2011 and closed in Jan 2014 with a total of 1917 patients randomised using a 1:1 ratio. The primary results were published in 2017 with results reported by M0 (N=915) and M1 (N=1002) subgroups.

Recruitment into the A-J (abiraterone + enzalutamide) comparison commenced in July 2014 and closed in March 2016 with a total of 1976 patients randomised using a 1:1 ratio. The primary analysis was planned to occur when 267 deaths had occurred in the control arm for all patients. We have already reached this event total but rather than undertake the final analysis in all patients, we aim to modify the final statistical analysis and the rationale for this is described below.

Follow-up continued in both A-G and A-J comparisons until November 2021. Patients still receiving abiraterone and/or enzalutamide will be given access to continued drug supply, but no further outcome data is being collected on them apart from SAE reporting.

### A1.2 New knowledge with implications for the final analysis of the A-J comparison

1. Abiraterone is more effective than was expected when Arm A-J was designed. The target HR for the Arm A-G comparison was 0.75 and the observed HR was 0.63, 95% confidence interval [CI], 0.52 to 0.76;  $P < 0.001$  (1). Failure free survival benefit was even greater: 0.29; 95% CI, 0.25 to 0.34;  $P < 0.001$ . These results were confirmed in the independent, industry-sponsored LATITUDE trial (2). Similar benefit has been observed with enzalutamide in the EnzaMet trial, although the comparison in the latter trial was ADT with a non-steroidal anti-androgen (3), and with the anti-androgen apalutamide in the industry-sponsored Titan trial (4). Given the high efficacy of abiraterone or enzalutamide as single agents, it is considered unlikely that we will detect superiority for the combination over the single agents in an unselected population. This is especially notable in the M0 cohort where only 34/460 patients in the active arm died at primary analysis of Arm A-G (1).
2. Two of three trials in mCRPC evaluating combination CYP17A1 and AR inhibition have been reported. Both found no increase in efficacy for the combination but a slight increase in toxicity (5). Most notably, the Alliance study randomized 1311 1st line mCRPC patients 1:1 to abiraterone and enzalutamide versus

enzalutamide. This was an open label trial, and no OS benefit was found ([NCT01949337](#), presented at ASCO 2019 by Morris et al.). The third trial is the industry-sponsored ACIS trial that randomised 983 1<sup>st</sup> line mCRPC patients to abiraterone with apalutamide versus abiraterone with placebo ([NCT02257736](#)) and is due to be reported in 2021.

Given the major differences in event rates for M0 and M1 patients we propose to split these two populations for the A-J primary analysis and combine them with the patients from the A-G comparison testing abiraterone alone. Thus, we will be testing the efficacy of androgen receptor (AR) therapy (using abiraterone alone or in combination with enzalutamide) in M1 and M0 patients separately. Further imaging and biomarker-stratified analyses are also planned to identify both prognostic and predictive biomarkers to inform de-escalation or escalation of AR therapy. Separate SAPs will be developed for these analyses.

### **A1.3 Proposed outcome measures for M0 patients**

As for other STAMPEDE comparisons, A-G and A-J have been designed to use Failure-Free-Survival (FFS) as the intermediate outcome and Overall Survival (OS) as the final primary outcome. However, the ICECAP meta-analysis of patients with M0 disease has demonstrated that Metastasis-Free-Survival (MFS), defined as time from randomisation to distant metastases confirmed by imaging or histological evidence or death from any cause, is a robust surrogate outcome measure for OS (6). A similar meta-analysis of patients with M1 disease is currently under way (STOPCAP) but has not yet reported. Therefore, we propose to use MFS as our primary outcome measure for the M0 patients but will keep OS as our primary outcome measure for the M1 patients. A full description of these outcome measures is provided in the main A-J comparison SAP.

See Addendum 1 for a summary of the number of events in the control arm for different outcome measures in the A-G and A-J comparisons based upon data extraction in July 2019 when this SAP was first updated.

### **A1.4 Proposed combined analysis of A-G and A-J comparisons for M0 patients**

By combining M0 patients from A-G and A-J into one meta-analysis we will have 920 M0 patients randomised between Abi and control in A-G and 1062 M0 patients randomised between Abi/Enza vs control in A-J => total meta-analysis size of 1982 patients equally randomised between AR therapy vs control over a 4.5 year recruitment period.

There was ~6 month gap in recruitment between Jan-June 2014 between close of A-G and activation of A-J. Thus, there are no shared control group issues for the M0 patients as each trial has their own set of unshared concurrent controls.

Addendum 1 summarises the number of MFS events in the control arms of the M0 patients in A-G and A-J, with a total of 135 (A-G) and 87 (A-J) = 222 MFS events having occurred by July 2019.

Addendum 2 provides the nstage software output from Stata indicating the number of events we need in the control arms of A-G and A-J to power a robust comparison in M0 patients. The following assumptions were used:

- Using 70% survival at 66 months (taken from the M0 patients in the A-G control arm curves)
- Assume a recruitment rate of 37 patients per month for 4.5 years (54 months) => 1998 patients
- Target power for primary analysis: 90%, significance level of 1.25% (one-sided) to account for one previous primary analysis of M0 patients in the A-G comparison.
- Target HR for treatment: 0.75

For a simple 2-arm trial as there are no shared M0 controls, we require 315 MFS events in the control arm. Further consideration of the number of shared events with the 2017 G analysis indicates that only one quarter of the events in the control arm have been used in that previous 2017 analysis so our one-sided significance level of 1.25% is conservative. Accounting for the actual number of shared events indicates that this can be relaxed to 2.18% and this would lead to the need for at least 277 MFS events to have occurred in M0 patients in the combined control arms of A-G and A-J. There will also be a small loss in power

associated with combining the datasets using a meta-analysis approach so boosting the power to 92% will require 299 events in the M0 control arms. Thus, we will aim for at least 300 MFS events to have occurred in the control arm before we undertake the analysis.

#### Timelines for reporting M0 results

We have used ARTPEP and other forecasting approaches to predict when ~300 control arm events will be reached, and this suggests that it will occur in Q2 2021 (see Addendum 3). Following data cleaning and analysis, we anticipate that this analysis of M0 patients will be able to report by Q4 2021 at the latest. It is possible we may be able to analyse earlier to coincide with presentation of results at ESMO 2021 but this will depend on the extent of data cleaning and quality by early August 2021.

#### **A1.5 Meta-analysis methods for the combined analysis of M0 patients in A-G and A-J**

An IPD meta-analysis will be undertaken to combine the A-G and A-J comparisons for M0 patients. Definition of outcomes, handling of data and analysis methods for survival outcomes will be as described in the main SAP for the primary analysis of the Abiraterone + Enzalutamide comparison (version 4.0). As for the main analysis the adjusted treatment effect estimate is regarded as the primary analysis and this pooled meta-analysis will combine the estimates adjusted for the minimisation strata.

After consultation with the MRC CTU meta-analysis group, it was agreed that a fixed effects meta-analysis would be most appropriate for the pooled estimation of treatment effects in this meta-analysis. Given the longer follow-up in the A-G comparison we anticipate a more precise estimate than that for the A-J comparison and it is possible that the A-J comparison treatment effect estimate will be larger than for A-G as it is testing a combination of two AR therapies. Both of these aspects are likely to generate some trial heterogeneity but a fixed rather than random effects meta-analysis was preferred as a) we are exploring the pooled effect of any AR therapy in these patients and b) all aspects of trial delivery have been almost identical for the two comparisons in terms of sites, protocols and eras of SoC. Forest plots will be used to present the adjusted estimates for each comparison separately alongside the pooled estimate. Any subgroup analyses or tests of interaction undertaken will be pooled using appropriate deft methods as described here (7)

#### **A1.6 Statistical analysis for the combined analysis of M1 patients in A-G and A-J**

Using the same methods as with the M0 patients, M1 patients from A-G and A-J comparisons will be combined for an IPD meta-analysis with OS as primary outcome. The A-G cohort represents the longest follow-up with trial-related data collected for ADT + 2nd generation hormone agent. A-J is the only cohort to have combined CYP3A4 inhibition with AR antagonism in mHSPC. The meta-analysis will include 1003 patients randomised between the control and "Abiraterone" arm, and 916 patients randomised between the control and "Enzalutamide and Abiraterone" arm. Any subgroup analyses or tests of interaction undertaken will be pooled using appropriate deft methods as described here (7). The primary result of interest for the community is evaluation of a difference in treatment effect (interaction HR) and between-trial heterogeneity for the A-G and A-J cohorts. These will be performed and reported as for the M0 cohorts. As this analysis indirectly compares the efficacy of adding enzalutamide to abiraterone, this is justified given a large benefit for the primary endpoint is likely to be required for a change in the current clinical practice of abiraterone with ADT to combination abiraterone and enzalutamide with ADT. Indirect comparisons with enzalutamide and ADT may also be required to change clinical practice.

#### **REFERENCES**

1. James ND, de Bono JS, Spears MR, Clarke NW, Mason MD, Dearnaley DP, et al. Abiraterone for Prostate Cancer Not Previously Treated with Hormone Therapy. *N Engl J Med*. 2017;377(4):338-51.
2. Fizazi K, Tran N, Fein L, Matsubara N, Rodriguez-Antolin A, Alekseev BY, et al. Abiraterone plus Prednisone in Metastatic, Castration-Sensitive Prostate Cancer. *N Engl J Med*. 2017;377(4):352-60.

3. Davis ID, Martin AJ, Stockler MR, Begbie S, Chi KN, Chowdhury S, et al. Enzalutamide with Standard First-Line Therapy in Metastatic Prostate Cancer. *N Engl J Med*. 2019;381(2):121-31.
4. Chi KN, Agarwal N, Bjartell A, Chung BH, Pereira de Santana Gomes AJ, Given R, et al. Apalutamide for Metastatic, Castration-Sensitive Prostate Cancer. *N Engl J Med*. 2019;381(1):13-24.
5. Attard G, Borre M, Gurney H, Lortot Y, Andresen-Daniil C, Kalleda R, et al. Abiraterone Alone or in Combination With Enzalutamide in Metastatic Castration-Resistant Prostate Cancer With Rising Prostate-Specific Antigen During Enzalutamide Treatment. *J Clin Oncol*. 2018;36(25):2639-46.
6. Xie W, Regan MM, Buyse M, Halabi S, Kantoff PW, Sartor O et al. Metastasis-Free Survival Is a Strong Surrogate of Overall Survival in Localized Prostate Cancer. *J Clin Oncol*. 2017 Sep 20;35(27):3097-3104. doi: 10.1200/JCO.2017.73.9987.
7. Fisher DJ, Carpenter JR, Morris TP, Freeman SC, Tierney JF. Meta-analytical methods to identify who benefits most from treatments: daft, deluded, or deft approach?. *bmj*. 2017 Mar 3;356.

**ADDENDUM 1 - Numbers of events in control arms by July 2019****Abiraterone comparison (A vs G) - control event numbers**

| Has FFS event<br>occured? | Mets status |     | Total |
|---------------------------|-------------|-----|-------|
|                           | M0          | M1  |       |
| No event                  | 263         | 69  | 332   |
| Yes event                 | 192         | 433 | 625   |
| Total                     | 455         | 502 | 957   |

| Has MFS event<br>(ICECAP<br>definition<br>) occurred? | Mets status |     | Total |
|-------------------------------------------------------|-------------|-----|-------|
|                                                       | M0          | M1  |       |
| No event                                              | 320         | 143 | 463   |
| Yes event                                             | 135         | 359 | 494   |
| Total                                                 | 455         | 502 | 957   |

| Has patient<br>died? | Mets status |     | Total |
|----------------------|-------------|-----|-------|
|                      | M0          | M1  |       |
| Not died             | 362         | 195 | 557   |
| Yes died             | 93          | 307 | 400   |
| Total                | 455         | 502 | 957   |

**Enz+Abi comparison (A vs J) - control event numbers**

| Has FFS event<br>occured? | Mets status |     | Total |
|---------------------------|-------------|-----|-------|
|                           | M0          | M1  |       |
| No event                  | 413         | 103 | 516   |
| Yes event                 | 120         | 351 | 471   |
| Total                     | 533         | 454 | 987   |

| Has MFS event<br>(ICECAP<br>definition<br>) occurred? | Mets status |     | Total |
|-------------------------------------------------------|-------------|-----|-------|
|                                                       | M0          | M1  |       |
| No event                                              | 446         | 188 | 634   |
| Yes event                                             | 87          | 266 | 353   |
| Total                                                 | 533         | 454 | 987   |

| Has patient<br>died? | Mets status |     | Total |
|----------------------|-------------|-----|-------|
|                      | M0          | M1  |       |
| Not died             | 479         | 258 | 737   |
| Yes died             | 54          | 196 | 250   |
| Total                | 533         | 454 | 987   |

**ADDENDUM 2 - Nstage calculation for target control arm event number, based on observed MFS in combined analysis of A-G and A-J for M0 patients**

nstage, s(0.7) t(66) tunit(4) accrue(37) alpha(0.0125) omega(0.9) hr0(1) hr1(0.75)  
tstop(54) nstage(1) aratio(1) arms(2)

n-stage trial design version 3.0.1, 10 Sept 2014

-----  
Sample size for a 2-arm 1-stage trial with time-to-event outcome  
based on Royston et al. (2011) Trials 12:81  
-----

Median survival time: 128.3 time units

## Operating characteristics

| Alpha(1S) | Power | HR H0 | HR H1 | Crit. HR | Duration |
|-----------|-------|-------|-------|----------|----------|
| 0.013     | 0.901 | 1.000 | 0.750 | 0.836    | 97.750   |

-----  
Patient accrual stopped at time 54.000

Duration is expressed in one month periods and assumes survival times are exponentially distributed

## Sample size and number of events

|           | Overall | Control | Exper. |
|-----------|---------|---------|--------|
| Arms      | 2       | 1       | 1      |
| Acc. rate | 37      | 19      | 19     |
| Patients  | 1998    | 999     | 999    |
| Events    | 563     | 315     | 248    |

### ADDENDUM 3 - Estimation of control arm event accrual for M0 patients, assuming linear increase based on observed quarterly accrual in 2018

As of the July 2019 data extraction, there were 135+87=222 MFS events in the combined G+J control arms. To account for the lag in reporting that is typically seen between a data extraction and return of the progression CRFs from sites, we add 16 additional events to the total of 222 observed leading to a total of 238 by Q3 2019.

Event forecast assuming rate of MFS event accrual continues as per 2018 for both comparisons (5 per quarter in A-G comparison; 6 per quarter in A-J comparison; total = 11 events per quarter). We anticipate reaching 315 events in the control arm of the combined comparisons at the end of Q2 2021. Therefore, we propose to close follow-up of both A-G and A-J comparisons at the end of June 2021. We would require 3 months for data cleaning and analysis with reporting in Q4 2021. Further close out funding would be required to complete the FSR and EuRACT upload by June 2022.

|     | quarter | quarter~y | tot_ev~s |                                          |
|-----|---------|-----------|----------|------------------------------------------|
| 1.  | 1       | Q3 2019   | 238      |                                          |
| 2.  | 2       | Q4 2019   | 249      |                                          |
| 3.  | 3       | Q1 2020   | 260      |                                          |
| 4.  | 4       | Q2 2020   | 271      |                                          |
| 5.  | 5       | Q3 2020   | 282      |                                          |
| 6.  | 6       | Q4 2020   | 293      |                                          |
| 7.  | 7       | Q1 2021   | 304      |                                          |
| 8.  | 8       | Q2 2021   | 315      | A-G and A-J comparisons closes follow-up |
| 9.  | 9       | Q3 2021   | 321      |                                          |
| 10. | 10      | Q4 2021   | 327      |                                          |
| 11. | 11      | Q1 2022   | 333      |                                          |
| 12. | 12      | Q2 2022   | 339      |                                          |



**7 SIGNATURES OF APPROVAL****Date:** 25-May-2022**Version:** 4.0**Signatures**

| <b>Name</b>   | <b>Trial Role</b>                            | <b>Signature</b>                                                                                                              | <b>Date</b> |
|---------------|----------------------------------------------|-------------------------------------------------------------------------------------------------------------------------------|-------------|
| Nick James    | Chief Investigator*                          | 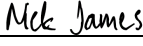<br>DocuSigned by:<br>C376081600384F4...   | 22-Jun-2022 |
| Gert Attard   | CCI: "Enzalutamide + abiraterone comparison" | <br>DocuSigned by:<br>9E5B0000084454...    | 21-Jun-2022 |
| Louise Brown  | Project Lead                                 | <br>DocuSigned by:<br>B2205196200494...    | 16-Jun-2022 |
| Chris Brawley | Trial statistician                           | <br>DocuSigned by:<br>F522850984B1A41...   | 22-Jun-2022 |
| Laura Murphy  | Trial statistician                           | <br>DocuSigned by:<br>D522850984B1A41... | 17-Jun-2022 |
| Max Parmar    | CTU Director and Programme Lead              | <br>DocuSigned by:<br>47F3FE2126EF4EE... | 23-Jun-2022 |

\*On behalf of the STAMPEDE Trial Management Group

**Credits:** Other statisticians involved in development of this SAP have been Rachael Jinks, Gordana Jovic and Melissa Spears**Reviewers:** Ian White (Apr-2018), Babak Oskooei-Choodari (Apr-2018)

## STAMPEDE OVERSIGHT COMMITTEES, STAFF AND COLLABORATORS

Version: 29-Mar-2023

### CONTENTS

|                                                             |                                     |
|-------------------------------------------------------------|-------------------------------------|
| NOTES.....                                                  | 2                                   |
| TRIAL MANAGEMENT GROUP.....                                 | 3                                   |
| INDEPENDENT DATA MONITORING COMMITTEE .....                 | 4                                   |
| TRIAL STEERING COMMITTEE .....                              | 5                                   |
| MRC CLINICAL TRIALS UNIT AT UCL STAFF.....                  | 6                                   |
| SWISS GROUP FOR CANCER CLINICAL RESEARCH (SAKK) STAFF ..... | 11                                  |
| BIOLOGY AND IMAGING SUBGROUPS .....                         | 12                                  |
| INVESTIGATORS AND COLLABORATORS: SITE STAFF.....            | <b>Error! Bookmark not defined.</b> |
| INDUSTRY COLLABORATORS.....                                 | 152                                 |
| PARTICIPANTS .....                                          | 153                                 |

## NOTES

Investigators and site staff are those who have formally appeared at any time on a site's Delegation Logs.

CTU staff are those who have worked on or contributed to the trial any time from the outset until the date of this report.

The independent members of the Independent Data Monitoring Committee and Trial Oversight Committee play an important role in the conduct of the trial.

Industry collaborators are a subset of the people who have worked, on relevant sections, with the trial staff to ensure the trial runs efficiently.

## TRIAL MANAGEMENT GROUP

(Listing only member external to the trials unit or senior staff at the trials unit)

| Area              | Status   | Member               | Geography                        | Role                        |
|-------------------|----------|----------------------|----------------------------------|-----------------------------|
| Clinical/Surgical | Current  | Gerhardt Attard      | London (UCL), UK                 | CCI                         |
| ~                 | ~        | Simon Chowdhury      | London (Guys), UK                |                             |
| ~                 | ~        | Noel Clarke          | Manchester, UK                   | Deputy CI, Co-CCI           |
| ~                 | ~        | William Cross        | Leeds, UK                        |                             |
| ~                 | ~        | David Dearnaley      | Sutton, UK                       |                             |
| ~                 | ~        | Silke Gillessen      | Lugano, Switzerland <sup>1</sup> | CCI                         |
| ~                 | ~        | Nicholas James       | London (ICR), UK <sup>2</sup>    | CI                          |
| ~                 | ~        | Rob Jones            | Glasgow, UK                      |                             |
| ~                 | ~        | Zafar Malik          | Wirral, UK                       |                             |
| ~                 | ~        | Chris Parker         | Sutton, UK                       | CCI                         |
| ~                 | ~        | J Martin Russell     | Glasgow, BOC                     |                             |
| ~                 | Previous | Daniel Aebersold     | Berne, Switzerland               |                             |
| ~                 | ~        | John Anderson        | Sheffield, UK                    |                             |
| ~                 | ~        | Johann de Bono       | Sutton, UK                       |                             |
| ~                 | ~        | Malcolm Mason        | Cardiff, UK                      |                             |
| ~                 | ~        | John Masters         | London, UK                       |                             |
| ~                 | ~        | Rick Popert          | London (Guys), UK                |                             |
| ~                 | ~        | Alastair Ritchie     | Gloucester, UK                   |                             |
| ~                 | ~        | George Thalmann      | Berne, Switzerland               |                             |
| PPI               | Current  | David Matheson       | Other                            |                             |
| ~                 | ~        | Robin Millman        | ~                                |                             |
| ~                 | Previous | John Dwyer           | ~                                |                             |
| ~                 | ~        | David Hoe-Richardson | ~                                |                             |
| ~                 | ~        | Jim Stansfeld        | ~                                |                             |
| Senior CTU        | Current  | Claire Amos          | MRC CTU at UCL                   |                             |
| ~                 | ~        | Louise Brown         | ~                                |                             |
| ~                 | ~        | Adrian Cook          | ~                                |                             |
| ~                 | ~        | Duncan Gilbert       | ~                                |                             |
| ~                 | ~        | Ruth Langley         | ~                                | CCI                         |
| ~                 | ~        | Mahesh Parmar        | ~                                | Programme Lead <sup>3</sup> |
| ~                 | ~        | Matthew Sydes        | ~                                |                             |
| ~                 | Previous | Nafisah Atako        | ~                                |                             |
| ~                 | ~        | Cheryl Pugh          | ~                                |                             |
| Clinical Fellow   | Current  | Hoda Abdely-Aty      | MRC CTU at UCL                   |                             |
| ~                 | ~        | Hannah Rush          | ~                                |                             |
| ~                 | Previous | Clare Gilson         | ~                                |                             |
| ~                 | ~        | Archie MacNair       | ~                                |                             |

**Key:** CI = Chief Investigator  
CCI = Comparison CI  
CoCCI = Comparison Co-CI

**Note:** The full list of MRC CTU at UCL staff is detailed below in a subsequent section.

<sup>1</sup> Previously Manchester, UK & St Gallen, Switzerland

<sup>2</sup> Previously Birmingham, UK & Warwick, UK

<sup>3</sup> Also CTU Director

## INDEPENDENT DATA MONITORING COMMITTEE

(All members independent)

| Member          | Status   | Role    |
|-----------------|----------|---------|
| Richard Emsley  | Current  |         |
| Bertrand Tombal | ~        | Chair 3 |
| Ronald de Wit   | ~        |         |
| Chris Williams  | Previous | Chair 1 |
| John Yarnold    | ~        | Chair 2 |
| Doug Altman     | ~        |         |
| Reg Hall        | ~        |         |

**TRIAL STEERING COMMITTEE**  
(Listing only independent members)

| <b>Member</b>      | <b>Status</b> | <b>Role</b> |
|--------------------|---------------|-------------|
| Paula Ghaneh       | Current       | Chair 3     |
| Tim Clayton        | ~             |             |
| Jan-Erik Dember    | ~             |             |
| Paul Nash          | ~             | PPI rep     |
| James Larkin       | ~             |             |
| Jonathan Ledermann | Previous      | Chair 1     |
| Richard Emsley     | ~             |             |
| John Fitzpatrick   | ~             |             |
| Alan Horwich       | ~             |             |
| David Kirk         | ~             |             |
| Jim Paul           | ~             |             |

## MRC CLINICAL TRIALS UNIT AT UCL STAFF

| Area          | Status                       | Name                 |                             |
|---------------|------------------------------|----------------------|-----------------------------|
| Statisticians | Current                      | Louise Brown         |                             |
|               | ~                            | Adrian Cook          |                             |
|               | ~                            | Peter Dutey-Magni    |                             |
|               | ~                            | Laura Murphy         |                             |
|               | ~                            | Matthew Nankivell    |                             |
|               | ~                            | Mahesh Parmar        |                             |
|               | ~                            | Matthew Sydes        |                             |
|               | ~                            | Yathushan Yogeswaran |                             |
|               | ~                            | Previous             | Sophie Barthel              |
|               | ~                            | ~                    | Daniel Bratton              |
|               | ~                            | ~                    | Christopher Brawley         |
|               | ~                            | ~                    | Babak Choodari-Oskooei      |
|               | ~                            | ~                    | Trinh Duong                 |
|               | ~                            | ~                    | Andrew Embleton             |
|               | ~                            | ~                    | Melissa Gannon (nee Spears) |
|               | ~                            | ~                    | Fiona Ingleby               |
|               | ~                            | ~                    | Elizabeth James             |
|               | ~                            | ~                    | Rachel Jinks (nee Morgan)   |
|               | ~                            | ~                    | Gordana Jovic               |
|               | ~                            | ~                    | Patrick Royston             |
|               | ~                            | ~                    | Melissa Spears              |
|               | Project and Trial Management | Current              | Claire Amos                 |
|               |                              | ~                    | Charlene Carvalho           |
| ~             |                              | Mazna Anjun          |                             |
| ~             |                              | Anna Griffiths       |                             |
| ~             |                              | Fleur Hudson         |                             |
| ~             |                              | Panos Maniatis       |                             |
| ~             |                              | Connor McAlpine      |                             |
| ~             |                              | Claire Murphy        |                             |
| ~             |                              | Horeja Njai          |                             |
| ~             |                              | Previous             | Shabinah Ali                |
| ~             |                              | ~                    | Sofeya Ishqa                |
| ~             |                              | ~                    | Dipa Noor                   |
| ~             |                              | ~                    | Malissa Richmond            |
| ~             |                              | ~                    | Karen Sanders               |
| ~             |                              | ~                    | Lily Clarke                 |
| ~             |                              | ~                    | Michelle Buckner            |
| ~             |                              | ~                    | Nafisah Atako               |
| ~             |                              | ~                    | Alanna Brown                |
| ~             |                              | ~                    | Joanna Calvert              |
| ~             |                              | ~                    | Rahela Choudhury            |
| ~             |                              | ~                    | Zoe Cotton                  |
| ~             |                              | ~                    | Adam Cursley                |
| ~             |                              | ~                    | Tom Fairfield               |
| ~             |                              | ~                    | Silvia Forcat               |
| ~             |                              | ~                    | Michelle Gabriel            |
| ~             |                              | ~                    | Charlene Green              |
| ~             |                              | ~                    | Adam Gregory                |
| ~             |                              | ~                    | Anna Herasimtschuk          |

## MRC CLINICAL TRIALS UNIT AT UCL STAFF

| Area                            | Status   | Name                 |
|---------------------------------|----------|----------------------|
| ~                               | ~        | Caroline Hogan       |
| ~                               | ~        | Brooke Jackson       |
| ~                               | ~        | Sarah Jackson        |
| ~                               | ~        | Neil Kelk            |
| ~                               | ~        | James Latham         |
| ~                               | ~        | Dymphna Lee          |
| ~                               | ~        | Sarah Miller         |
| ~                               | ~        | Sharon Naylor        |
| ~                               | ~        | Dipa Noor            |
| ~                               | ~        | Jacqui Nuttall       |
| ~                               | ~        | Jenny Petrie         |
| ~                               | ~        | Cheryl Pugh          |
| ~                               | ~        | Orla Prendiville     |
| ~                               | ~        | Cheryl Pugh          |
| ~                               | ~        | Karen Sanders        |
| ~                               | ~        | Francesca Schiavone  |
| ~                               | ~        | Clare Shakeshaft     |
| ~                               | ~        | Aminata Sy           |
| ~                               | ~        | Charlotte Tyson      |
| ~                               | ~        | Hannah Vaughan       |
| ~                               | ~        | Christopher Wanstall |
| ~                               | ~        | Katie Ward           |
| ~                               | ~        | Melanie Weiss        |
| ~                               | ~        | Arlen Wilcox         |
| Clinicians                      | Current  | Hoda Abdel-Aty       |
| ~                               | ~        | Duncan Gilbert       |
| ~                               | ~        | Ruth Langley         |
| ~                               | ~        | Hannah Rush          |
| ~                               | Previous | Clare Gilson         |
| ~                               | ~        | Archie Macnair       |
| ~                               | ~        | Sarah Meredith       |
| ~                               | ~        | Alastair Ritchie     |
| Data Scientists and Programmers | Current  | Christina Chung      |
| ~                               | ~        | Carlos Diaz-Montana  |
| ~                               | ~        | Georgia Marley       |
| ~                               | ~        | Lindsey Masters      |
| ~                               | ~        | Mary Rauchenberger   |
| ~                               | ~        | Stephen Townsend     |
| ~                               | ~        | Nadine Van-Looy      |
| ~                               | Previous | Carly Au             |
| ~                               | ~        | Will Cragg           |
| ~                               | ~        | Dominic Hague        |
| ~                               | ~        | Zaheer Islam         |
| ~                               | ~        | Sajad Khan           |
| ~                               | ~        | Dominic Mounsey      |
| ~                               | ~        | Nancy Tappenden      |
| ~                               | ~        | Nadine Van-Looy      |
| Data Management                 | Current  | Shaan Akbar          |
| ~                               | ~        | Yumna Ali            |



## MRC CLINICAL TRIALS UNIT AT UCL STAFF

| Area | Status   | Name                  |
|------|----------|-----------------------|
| ~    | ~        | Ify Ejizu-Allen       |
| ~    | ~        | Hanna Barghouty       |
| ~    | ~        | Sophia Bradshaw       |
| ~    | ~        | Daneil Clarke         |
| ~    | ~        | Hareesh Dadlani       |
| ~    | ~        | Donna Dobson          |
| ~    | ~        | Lawrence Evans        |
| ~    | ~        | Isabella Jaques       |
| ~    | ~        | Alexander Lawton      |
| ~    | ~        | Simona Wade           |
| ~    | Previous | Margaret Hook         |
|      |          | Nazia Parkar          |
|      |          | Eva Ades              |
| ~    | ~        | Carly Au              |
| ~    | ~        | Katherine Beaney      |
| ~    | ~        | Nargis Begum          |
| ~    | ~        | Katharine Bellenger   |
| ~    | ~        | Lina Bergstrom        |
| ~    | ~        | Veronica Birzu        |
| ~    | ~        | Robin Carpenter       |
| ~    | ~        | Elizabeth Clark       |
| ~    | ~        | Emma Donoghue         |
| ~    | ~        | Amy Fiddament         |
| ~    | ~        | Shree Gajjar          |
| ~    | ~        | Hannah Gardner        |
| ~    | ~        | Jenna Grabey          |
| ~    | ~        | Richard Gracie        |
| ~    | ~        | Charlene Green        |
| ~    | ~        | Adam Gregory          |
| ~    | ~        | Dominic Hague         |
| ~    | ~        | Shama Hassan          |
| ~    | ~        | Jordan Hedges         |
| ~    | ~        | Robyn Henry-Cockles   |
| ~    | ~        | William Hudson        |
| ~    | ~        | Sofeya Ishaq          |
| ~    | ~        | Danielle Johnson      |
| ~    | ~        | Saba Khan             |
| ~    | ~        | Zohrah Khan           |
| ~    | ~        | Linda Ly              |
| ~    | ~        | Adele Mabley          |
| ~    | ~        | Georgia Mannion-Krase |
| ~    | ~        | Jacque Millett        |
| ~    | ~        | Myfanwy Nicholas      |
| ~    | ~        | Rachel Ogunleye       |
| ~    | ~        | Meghna Pandya         |
| ~    | ~        | Reena Patel           |
| ~    | ~        | Sara Peres            |
| ~    | ~        | Tasmin Philips        |
| ~    | ~        | Philip Pollock        |
| ~    | ~        | Chathurika Rajapakse  |

## MRC CLINICAL TRIALS UNIT AT UCL STAFF

| Area                       | Status   | Name               |
|----------------------------|----------|--------------------|
| ~                          | ~        | Tim Smith          |
| ~                          | ~        | Hannah Sweeney     |
| ~                          | ~        | Arpita Upadhyaya   |
| ~                          | ~        | Laura Van Dyck     |
| ~                          | ~        | Hannah Vaughan     |
| ~                          | ~        | Peter Vaughan      |
| ~                          | ~        | Katie Ward         |
| ~                          | ~        | Steph Wetton       |
| ~                          | ~        | Andrew Whitney     |
| ~                          | ~        | Selin Yurdakul     |
| Other Operations           | Current  | Fleur Hudson       |
| ~                          | ~        | Nicola Joffe       |
| ~                          | ~        | Macey Murray       |
| Trial Assistants           | Current  | Tracey Fisher      |
| ~                          | ~        | Olivia Mahoro      |
| ~                          | ~        | Lynda Micklewright |
| ~                          | Previous | Elizabeth Adesanya |
| ~                          | ~        | Yumna Ali          |
| ~                          | ~        | Atma Amin          |
| ~                          | ~        | Hannah Babiker     |
| ~                          | ~        | Bryony Bathie      |
| ~                          | ~        | Helen Chapman      |
| ~                          | ~        | Georgia Cowley     |
| ~                          | ~        | Leigh Dobson       |
| ~                          | ~        | James Dunn         |
| ~                          | ~        | Robbie Dunn        |
| ~                          | ~        | Amy Fiddament      |
| ~                          | ~        | Ben Forson         |
| ~                          | ~        | Adam Gregory       |
| ~                          | ~        | Nasir Jamil        |
| ~                          | ~        | Tasheeka Jeyapalan |
| ~                          | ~        | Sherwen Kang       |
| ~                          | ~        | Harry Kitson       |
| ~                          | ~        | Rebecca Lo         |
| ~                          | ~        | Joseph Martin      |
| ~                          | ~        | Nour Merzouki      |
| ~                          | ~        | Lynda Micklewright |
| ~                          | ~        | Meghna Pandya      |
| ~                          | ~        | Ray Phillips       |
| ~                          | ~        | Jamie Simmons      |
| ~                          | ~        | Shanaz Sohail      |
| ~                          | ~        | Jeevan Sohal       |
| ~                          | ~        | Crystallynn The    |
| ~                          | ~        | Nat Thorogood      |
| ~                          | ~        | Stephanie Tsenti   |
| ~                          | ~        | Alexandra Wadia    |
| ~                          | ~        | Stephanie Wetton   |
| STOPCAP Meta-Analysis team | Current  | Sarah Burdett      |
| ~                          | ~        | David Fisher       |

## MRC CLINICAL TRIALS UNIT AT UCL STAFF

| Area                   | Status   | Name             |
|------------------------|----------|------------------|
| ~                      | ~        | Peter Godolphin  |
| ~                      | ~        | Larysa Rydzewska |
| ~                      | ~        | Jayne Tierney    |
| ~                      | ~        | Claire Vale      |
| Administration support | Current  | Sarah Banbury    |
| ~                      | ~        | Beth Jarman      |
| ~                      | Previous | Lesley Brempong  |
| ~                      | ~        | Emmanuel Harding |
| ~                      | ~        | Gillian Hurst    |
| ~                      | ~        | Nishat Tasnim    |
| ~                      | ~        | Jemima Thompson  |

## SWISS GROUP FOR CANCER CLINICAL RESEARCH (SAKK) STAFF

| Area            | Status | Name             |
|-----------------|--------|------------------|
| SAKK operations | ~      | Estelle Cassolly |
| ~               | ~      | Pierre Fustier   |
| ~               | ~      | Eloïse Kremer    |
| ~               | ~      | Corinne Schar    |

**BIOLOGY AND IMAGING SUBGROUPS**

(Members of translational subgroups or work packages; TMG members not repeated here)

| Person                          | Status   | Geography                              |
|---------------------------------|----------|----------------------------------------|
| Adnan Ali                       | Previous | Manchester, UK                         |
| Radhi Anand                     | Previous | London (UCL), UK                       |
| Hassan Douis                    | Previous | Birmingham, UK                         |
| Dan Berney                      | Current  | London (Barts), UK                     |
| Ros Eeles                       | ~        | London (ICR), UK                       |
| Stephenie Friedrich             | ~        | London (UCL), UK                       |
| Emily Grist                     | ~        | London (UCL), UK                       |
| Anis A Hamid                    | ~        | Melbourne, Aus & Boston (DFCI), USA    |
| Aine Haran                      | ~        | Manchester, UK                         |
| A M Mahedi Hassan               | ~        | London (UCL), UK                       |
| Alex Hoyle                      | ~        | Manchester, UK                         |
| Sakunthala Kudahetti            | ~        | London (Barts), UK                     |
| Sharanpreet Lall                | ~        | London (UCL), UK                       |
| Gianmarco Leone                 | ~        | London (UCL), UK                       |
| Hing Leung                      | ~        | Glasgow, BOC                           |
| Stefano Lise                    | ~        | London (UCL), UK                       |
| Larissa Mendes                  | ~        | London (UCL), UK                       |
| Karolina Nowakowska-Pawelkowicz | ~        | London (UCL), UK                       |
| Charles Parker                  | ~        | London (UCL), UK                       |
| Marina Parry                    | ~        | London (UCL), UK                       |
| Alison Parry-Jones              | ~        | Cardiff, UK                            |
| Chris Sweeney                   | ~        | Boston (DFCI), USA, Adelaide Australia |
| Suparna Thakali                 | ~        | London (UCL), UK                       |
| Nina Tinariu                    | ~        | London (ICR), UK                       |
| Maria Vico                      | ~        | London (UCL), UK                       |
| Sara Santos Vidal               | ~        | London (Barts), UK                     |
| Daniel Wetterskog               | ~        | London (UCL), UK                       |
| Anna Wingate                    | ~        | London (UCL), UK                       |
| Carla Bautista                  | Previous | London (UCL), UK                       |
| Paolo Cremaschi                 | ~        | London (UCL), UK                       |
| Thomas Hambrook                 | ~        | Manchester, UK                         |
| Alex Landless                   | ~        | London (UCL), UK                       |
| Nik Matthews                    | ~        | London (ICR), UK                       |
| Mariana Buongiorno Pereira      | ~        | London (UCL), UK                       |
| Kamila Sychowska                | ~        | London (UCL), UK                       |
| David Waugh                     | Previous | Belfast, UK                            |
| Leila Zakka                     | ~        | London (UCL), UK                       |

**INVESTIGATORS AND COLLABORATORS: SITE STAFF**

Staff on site delegation logs

| City        | Care site                  | Name                          | Site PI    |
|-------------|----------------------------|-------------------------------|------------|
| Abergavenny | Nevill Hall Hospital       | Christian Smith               |            |
| Aberystwyth | Bronglais General Hospital | Christine Kotonya             |            |
| Aberystwyth | Bronglais General Hospital | Elin Jones                    | PI         |
| Aberystwyth | Bronglais General Hospital | Helen Tench                   |            |
| Aberystwyth | Bronglais General Hospital | Mark Narain                   |            |
| Aberystwyth | Bronglais General Hospital | Philip Jones                  |            |
| Aberystwyth | Bronglais General Hospital | Russel Canavan                |            |
| Aberystwyth | Bronglais General Hospital | Sajid Durrani                 |            |
| Aberystwyth | Bronglais General Hospital | Emma Nurse                    | Pharmacist |
| Aberystwyth | Bronglais General Hospital | Gwenan Parry Jones            |            |
| Aberystwyth | Bronglais General Hospital | Kirsty Marie Dennett          |            |
| Aberystwyth | Bronglais General Hospital | Rhian Elin Jones              |            |
| Aberystwyth | Bronglais General Hospital | Sandra Griffiths nee Evens    |            |
| Aberystwyth | Bronglais General Hospital | Cerith Morgan                 |            |
| Aberystwyth | Bronglais General Hospital | Kenneth Richard Williams      |            |
| Aberystwyth | Bronglais General Hospital | Llinos Strange                | Pharmacist |
| Aberystwyth | Bronglais General Hospital | Sean Thomas                   |            |
| Aberystwyth | Bronglais General Hospital | Toby Frederick Trugeion-Smith |            |
| Aberystwyth | Bronglais General Hospital | Basharat Jameel               |            |
| Aberystwyth | Bronglais General Hospital | Bleddyn Edwards               |            |
| Aberystwyth | Bronglais General Hospital | Geraint Morgan                | Pharmacist |
| Aberystwyth | Bronglais General Hospital | John Edwards                  |            |
| Aberystwyth | Bronglais General Hospital | Donna Robson                  |            |
| Aberystwyth | Bronglais General Hospital | Heather McGuinness            |            |
| Aberystwyth | Bronglais General Hospital | Ronda Loosley                 |            |
| Aberystwyth | Bronglais General Hospital | Claire Duggan                 |            |
| Aberystwyth | Bronglais General Hospital | Sarah Jones                   |            |

|             |                            |                      |            |
|-------------|----------------------------|----------------------|------------|
| Aberystwyth | Bronglais General Hospital | Abigail Hynes        |            |
| Aberystwyth | Bronglais General Hospital | Rebecca Wolf-Roberts |            |
| Ashford     | William Harvey Hospital    | Albert Edwards       | Co-I       |
| Ashford     | William Harvey Hospital    | Charlotte Mott       |            |
| Ashford     | William Harvey Hospital    | Ifigenia Vasiliadou  |            |
| Ashford     | William Harvey Hospital    | Lavarniya Rajakumar  |            |
| Ashford     | William Harvey Hospital    | Mathini Sridharan    |            |
| Ashford     | William Harvey Hospital    | Patryk Brulinski     |            |
| Ashford     | William Harvey Hospital    | Rakesh Raman         | Co-I       |
| Ashford     | William Harvey Hospital    | Rohit Malde          |            |
| Ashford     | William Harvey Hospital    | Stephane Tankoua     |            |
| Ashford     | William Harvey Hospital    | Arafat Mizra         |            |
| Ashford     | William Harvey Hospital    | Carys Thomas         | PI         |
| Ashford     | William Harvey Hospital    | Clary Evans          |            |
| Ashford     | William Harvey Hospital    | Kannon Nathan        |            |
| Ashford     | William Harvey Hospital    | Kathryn Lees         |            |
| Ashford     | William Harvey Hospital    | Mathilda Cominos     |            |
| Ashford     | William Harvey Hospital    | Matthew Fenton       |            |
| Ashford     | William Harvey Hospital    | Mohammed Osman       |            |
| Ashford     | William Harvey Hospital    | Natasha Mithal       | Co-I       |
| Ashford     | William Harvey Hospital    | Sharon Beesley       |            |
| Ashford     | William Harvey Hospital    | Sugeeta Sukumar      |            |
| Ashford     | William Harvey Hospital    | Udaiveer Panwar      |            |
| Ashford     | William Harvey Hospital    | Coral Greenstreet    |            |
| Ashford     | William Harvey Hospital    | Hayley Blackgrove    |            |
| Ashford     | William Harvey Hospital    | Katy Taylor          |            |
| Ashford     | William Harvey Hospital    | Victoria Williamson  |            |
| Ashford     | William Harvey Hospital    | Natalie Catt         |            |
| Ashford     | William Harvey Hospital    | Arafat Mirza         |            |
| Ashford     | William Harvey Hospital    | Sam Gibson           |            |
| Ashford     | William Harvey Hospital    | Steve Dann           |            |
| Ashford     | William Harvey Hospital    | Andrew Gillian       | Pharmacist |
| Ashford     | William Harvey Hospital    | Miguel Capo-Mir      | Pharmacist |
| Ashford     | William Harvey Hospital    | Cindy Slater         |            |

|         |                         |                        |            |
|---------|-------------------------|------------------------|------------|
| Ashford | William Harvey Hospital | Hasmath Marjolin       |            |
| Ashford | William Harvey Hospital | Nikki Crisp            |            |
| Ashford | William Harvey Hospital | Rachel Larkins         |            |
| Ashford | William Harvey Hospital | Sandra Holness         |            |
| Ashford | William Harvey Hospital | Sarah Lines            |            |
| Ashford | William Harvey Hospital | Susan Rogers           |            |
| Ashford | William Harvey Hospital | Tessa Hammond          | Pharmacist |
| Ashford | William Harvey Hospital | Claire White           |            |
| Ashford | William Harvey Hospital | Julie Buckley          |            |
| Ashford | William Harvey Hospital | Laura Kehoe            |            |
| Ashford | William Harvey Hospital | Lesley Rose            |            |
| Ashford | William Harvey Hospital | Louise Gladwell        |            |
| Ashford | William Harvey Hospital | Sarah Lightfoot        | Pharmacist |
| Ashford | William Harvey Hospital | Tracy Boakes           |            |
| Ashford | William Harvey Hospital | Alba Tubau             |            |
| Ashford | William Harvey Hospital | Bonny Appleby          |            |
| Ashford | William Harvey Hospital | Linda Wray             | Pharmacist |
| Ashford | William Harvey Hospital | Louise Allen           |            |
| Ashford | William Harvey Hospital | Marian Wood            |            |
| Ashford | William Harvey Hospital | Adedolapo Sanni        |            |
| Ashford | William Harvey Hospital | Claire Pelham          |            |
| Ashford | William Harvey Hospital | Elizabeth Williamson   |            |
| Ashford | William Harvey Hospital | Hilary Zurakovsky      |            |
| Ashford | William Harvey Hospital | Jill Baker             |            |
| Ashford | William Harvey Hospital | Joanne Williams        |            |
| Ashford | William Harvey Hospital | Julie-Ann Davies       |            |
| Ashford | William Harvey Hospital | Karen Robinson         |            |
| Ashford | William Harvey Hospital | Kathleen (Kathy) Walsh |            |
| Ashford | William Harvey Hospital | Kim Mears              |            |
| Ashford | William Harvey Hospital | Kim Travis             |            |
| Ashford | William Harvey Hospital | Margaret Lipsham       |            |
| Ashford | William Harvey Hospital | Paula Whichelo         |            |
| Ashford | William Harvey Hospital | Sharon Middleton       |            |
| Ashford | William Harvey Hospital | Sue Kelly              |            |



|           |                           |                         |            |
|-----------|---------------------------|-------------------------|------------|
| Ashford   | William Harvey Hospital   | Susan Drakeley          |            |
| Ashford   | William Harvey Hospital   | Sydney Loveland         |            |
| Ashford   | William Harvey Hospital   | Molua Young             |            |
| Ashford   | William Harvey Hospital   | Denise Crawford         |            |
| Aylesbury | Stoke Mandeville Hospital | Ami Sabharwal           |            |
| Aylesbury | Stoke Mandeville Hospital | Andy Theobald           |            |
| Aylesbury | Stoke Mandeville Hospital | Janice Carpenter        |            |
| Aylesbury | Stoke Mandeville Hospital | Katherine Hyde          | PI         |
| Aylesbury | Stoke Mandeville Hospital | Thinn Pwint             | Co-I       |
| Aylesbury | Stoke Mandeville Hospital | Christopher Alcock      |            |
| Aylesbury | Stoke Mandeville Hospital | Gerard Andrade          |            |
| Aylesbury | Stoke Mandeville Hospital | Joanne Brady            |            |
| Aylesbury | Stoke Mandeville Hospital | Niki Panakis            |            |
| Aylesbury | Stoke Mandeville Hospital | Philip Camilleri        | Co-I       |
| Aylesbury | Stoke Mandeville Hospital | Prabir Chakraborti      |            |
| Aylesbury | Stoke Mandeville Hospital | Sean O'Cathail          |            |
| Aylesbury | Stoke Mandeville Hospital | Jonathan Greenland      |            |
| Aylesbury | Stoke Mandeville Hospital | Moncy Mathew            |            |
| Aylesbury | Stoke Mandeville Hospital | Rahul Kurup             |            |
| Aylesbury | Stoke Mandeville Hospital | Neil Trew-Smith         |            |
| Aylesbury | Stoke Mandeville Hospital | Alice Ngumo             |            |
| Aylesbury | Stoke Mandeville Hospital | Gail Varley             |            |
| Aylesbury | Stoke Mandeville Hospital | Janet Weir              |            |
| Aylesbury | Stoke Mandeville Hospital | Manisha Joshi           |            |
| Aylesbury | Stoke Mandeville Hospital | Siobhan Gettings        |            |
| Aylesbury | Stoke Mandeville Hospital | Cheryl Padilla-Harris   |            |
| Aylesbury | Stoke Mandeville Hospital | Maggie Aldersley        |            |
| Aylesbury | Stoke Mandeville Hospital | Margaret Bowerbank      |            |
| Aylesbury | Stoke Mandeville Hospital | Michelle Taylor-Siddons | Pharmacist |
| Aylesbury | Stoke Mandeville Hospital | Tracey Stammers         |            |
| Aylesbury | Stoke Mandeville Hospital | Anna Osadcow            |            |
| Aylesbury | Stoke Mandeville Hospital | Kathryn Herbert         |            |
| Aylesbury | Stoke Mandeville Hospital | Rossana Mancinelli      |            |
| Aylesbury | Stoke Mandeville Hospital | Sarah Manyangadze       |            |

|           |                           |                   |            |
|-----------|---------------------------|-------------------|------------|
| Aylesbury | Stoke Mandeville Hospital | Christine Collins |            |
| Aylesbury | Stoke Mandeville Hospital | Hazel Wynn        |            |
| Aylesbury | Stoke Mandeville Hospital | Iram Husain       |            |
| Aylesbury | Stoke Mandeville Hospital | Jasvinder Bains   |            |
| Aylesbury | Stoke Mandeville Hospital | Roisin Kavanagh   |            |
| Aylesbury | Stoke Mandeville Hospital | Andrew Protheroe  |            |
| Ayr       | Ayr Hospital              | Aisha Tufail      |            |
| Ayr       | Ayr Hospital              | David McIntosh    |            |
| Ayr       | Ayr Hospital              | Helena Belikova   |            |
| Ayr       | Ayr Hospital              | Jawaher Ansari    |            |
| Ayr       | Ayr Hospital              | Rebecca Muirhead  |            |
| Ayr       | Ayr Hospital              | Xia Ren           | Co-I       |
| Ayr       | Ayr Hospital              | Christina Lai     |            |
| Ayr       | Ayr Hospital              | Esfandiyar Khan   |            |
| Ayr       | Ayr Hospital              | Hilary Glen       | PI         |
| Ayr       | Ayr Hospital              | Lye Mun Tho       |            |
| Ayr       | Ayr Hospital              | Nicholas Macleod  |            |
| Ayr       | Ayr Hospital              | Rana Mahmood      |            |
| Ayr       | Ayr Hospital              | Stefan Nowich     |            |
| Ayr       | Ayr Hospital              | Kirsty O'Hara     |            |
| Ayr       | Ayr Hospital              | Kristy Ross       |            |
| Ayr       | Ayr Hospital              | Brian McGlynn     |            |
| Ayr       | Ayr Hospital              | Mark Wilson       |            |
| Ayr       | Ayr Hospital              | Philip Cannon     |            |
| Ayr       | Ayr Hospital              | Kathleen Smith    |            |
| Ayr       | Ayr Hospital              | Deborah Dunn      | Pharmacist |
| Ayr       | Ayr Hospital              | Jane McClements   |            |
| Ayr       | Ayr Hospital              | Susan Walton      | Pharmacist |
| Ayr       | Ayr Hospital              | Alison Murphy     | Pharmacist |
| Ayr       | Ayr Hospital              | Danielle Gilmour  |            |
| Ayr       | Ayr Hospital              | Elaine Watson     |            |
| Ayr       | Ayr Hospital              | Lillian White     |            |
| Ayr       | Ayr Hospital              | Lynne McNeil      | Pharmacist |
| Ayr       | Ayr Hospital              | Margaret McKernan |            |

|            |                               |                              |            |
|------------|-------------------------------|------------------------------|------------|
| Ayr        | Ayr Hospital                  | Sharon Meehan                |            |
| Ayr        | Ayr Hospital                  | Clare Love                   |            |
| Ayr        | Ayr Hospital                  | Claudia Coubrough (Turley)   |            |
| Ayr        | Ayr Hospital                  | Danna Yorston                | Pharmacist |
| Ayr        | Ayr Hospital                  | Diane Woodburn               | Pharmacist |
| Ayr        | Ayr Hospital                  | Dianne Hunter                |            |
| Ayr        | Ayr Hospital                  | Jenna Mitchell               |            |
| Ayr        | Ayr Hospital                  | Kirsten Laws (nee Borthwick) |            |
| Barnet     | Barnet General Hospital       | Ami Mehta                    |            |
| Barnet     | Barnet General Hospital       | Andrew Eichholz              |            |
| Barnet     | Barnet General Hospital       | Anita Mitra                  |            |
| Barnet     | Barnet General Hospital       | Annette Hawkins              |            |
| Barnet     | Barnet General Hospital       | Emily Scott                  |            |
| Barnet     | Barnet General Hospital       | Gehan Soosaipillai           |            |
| Barnet     | Barnet General Hospital       | Gillian Marks                |            |
| Barnet     | Barnet General Hospital       | Kate Smith                   | Co-I       |
| Barnet     | Barnet General Hospital       | Kimberley Durno              | Co-I       |
| Barnet     | Barnet General Hospital       | Magdalena Kubiak             | Co-I       |
| Barnet     | Barnet General Hospital       | Sarah Needleman              | PI         |
| Barnet     | Barnet General Hospital       | Ursula McGovern              |            |
| Barnet     | Barnet General Hospital       | Danielle Collier             |            |
| Barnet     | Barnet General Hospital       | Andie David                  |            |
| Barnet     | Barnet General Hospital       | Panayiotis Panayiotou        |            |
| Barnet     | Barnet General Hospital       | Heather Hughes               |            |
| Barnet     | Barnet General Hospital       | Prital Patel                 |            |
| Barnet     | Barnet General Hospital       | Sandra Faustino              |            |
| Barnet     | Barnet General Hospital       | Anita Amadi                  |            |
| Barnet     | Barnet General Hospital       | Alice Coady                  |            |
| Barnet     | Barnet General Hospital       | Christine Ellis              | Pharmacist |
| Barnet     | Barnet General Hospital       | Veronica Conteh              |            |
| Barnstable | North Devon District Hospital | Becky Holbrook               |            |
| Barnstaple | North Devon District Hospital | Ajaz Lone                    |            |
| Barnstaple | North Devon District Hospital | Chantal Oelofse              |            |
| Barnstaple | North Devon District Hospital | Elizabeth Kershaw            |            |

|            |                               |                      |            |
|------------|-------------------------------|----------------------|------------|
| Barnstaple | North Devon District Hospital | Faisal Hussain       |            |
| Barnstaple | North Devon District Hospital | Mohini Varughese     | PI         |
| Barnstaple | North Devon District Hospital | Peter Stephens       | Co-I       |
| Barnstaple | North Devon District Hospital | Philippa Smith       |            |
| Barnstaple | North Devon District Hospital | Sarah Park           |            |
| Barnstaple | North Devon District Hospital | Victoria Ford        | Co-I       |
| Barnstaple | North Devon District Hospital | Andy Bull            |            |
| Barnstaple | North Devon District Hospital | Denise Sheehan       |            |
| Barnstaple | North Devon District Hospital | Elizabeth Toy        |            |
| Barnstaple | North Devon District Hospital | Maria Martinez       |            |
| Barnstaple | North Devon District Hospital | Amy Thomas           |            |
| Barnstaple | North Devon District Hospital | Chloe Peters         |            |
| Barnstaple | North Devon District Hospital | Hannah Ong           |            |
| Barnstaple | North Devon District Hospital | Jenna Furse          |            |
| Barnstaple | North Devon District Hospital | Nyasha Manomano      | Pharmacist |
| Barnstaple | North Devon District Hospital | Jeffrey man sum Chan |            |
| Barnstaple | North Devon District Hospital | Joshua Gregory       | Pharmacist |
| Barnstaple | North Devon District Hospital | Michal Ian Lamparski | Pharmacist |
| Barnstaple | North Devon District Hospital | Thomas Baddick       | Pharmacist |
| Barnstaple | North Devon District Hospital | Eng Ong              |            |
| Barnstaple | North Devon District Hospital | Henry Goss           | Pharmacist |
| Barnstaple | North Devon District Hospital | Martin Moody         |            |
| Barnstaple | North Devon District Hospital | Rufus Smith          |            |
| Barnstaple | North Devon District Hospital | Ashley Hanson        |            |
| Barnstaple | North Devon District Hospital | Katherine Horder     |            |
| Barnstaple | North Devon District Hospital | Maria Beaumont       | Pharmacist |
| Barnstaple | North Devon District Hospital | Rebecca Davey        | Pharmacist |
| Barnstaple | North Devon District Hospital | Fiona Thomas         |            |
| Barnstaple | North Devon District Hospital | Helen Black          |            |
| Barnstaple | North Devon District Hospital | Laura Hanson         |            |
| Barnstaple | North Devon District Hospital | Lynne Van-Koutrik    |            |
| Barnstaple | North Devon District Hospital | Lynsey Balmbra-Jenks |            |
| Barnstaple | North Devon District Hospital | Natalie Kemp         | Pharmacist |
| Barnstaple | North Devon District Hospital | Samantha Ley         |            |

|             |                                          |                      |            |
|-------------|------------------------------------------|----------------------|------------|
| Barnstaple  | North Devon District Hospital            | Susan Collard        |            |
| Barnstaple  | North Devon District Hospital            | Alicia Leal-Santos   | Pharmacist |
| Barnstaple  | North Devon District Hospital            | Faye Windsor         |            |
| Barnstaple  | North Devon District Hospital            | Judyta Lomza         | Pharmacist |
| Barnstaple  | North Devon District Hospital            | Lynne Van Koutrik    |            |
| Basel       | Universitätsspital Basel                 | M Timmermann         |            |
| Basel       | Universitätsspital Basel                 | Cyrill Rentsch       | PI         |
| Basel       | Universitätsspital Basel                 | Frank Stenner-Liewen | Co-I       |
| Basel       | Universitätsspital Basel                 | Nicole Ebinger       |            |
| Basel       | Universitätsspital Basel                 | Stephen Wyler        |            |
| Basel       | Universitätsspital Basel                 | N Ott                |            |
| Basel       | Universitätsspital Basel                 | Cyrill Rentsch       |            |
| Basel       | Universitätsspital Basel                 | Eloise Kremer        |            |
| Basel       | Universitätsspital Basel                 | Heike Puschel        |            |
| Basel       | Universitätsspital Basel                 | Heike Puschel        |            |
| Basel       | Universitätsspital Basel                 | Mana Farsad          |            |
| Basel       | Universitätsspital Basel                 | Nicole Neumann       |            |
| Basel       | Universitätsspital Basel                 | Simone Marini        |            |
| Basel       | Universitätsspital Basel                 | Bettina Seifest      |            |
| Basel       | Universitätsspital Basel                 | Kristina Muller      |            |
| Basel       | Universitätsspital Basel                 | Alexander Bachmann   |            |
| Basel       | Universitätsspital Basel                 | Christoph Rochlitz   |            |
| Basingstoke | Basingstoke and North Hampshire Hospital | Dileep Soory         |            |
| Basingstoke | Basingstoke and North Hampshire Hospital | Hilawati Yusof       |            |
| Basingstoke | Basingstoke and North Hampshire Hospital | Ingrid White         |            |
| Basingstoke | Basingstoke and North Hampshire Hospital | Rosalyn Westley      |            |
| Basingstoke | Basingstoke and North Hampshire Hospital | Sangeeta Paisey      | PI         |
| Basingstoke | Basingstoke and North Hampshire Hospital | David Barlow         |            |
| Basingstoke | Basingstoke and North Hampshire Hospital | Eva Letalova         |            |
| Basingstoke | Basingstoke and North Hampshire Hospital | Jenny Nobes          |            |
| Basingstoke | Basingstoke and North Hampshire Hospital | Joanna Stokoe        |            |
| Basingstoke | Basingstoke and North Hampshire Hospital | Katharine Webb       |            |
| Basingstoke | Basingstoke and North Hampshire Hospital | Katherine Aitken     |            |
| Basingstoke | Basingstoke and North Hampshire Hospital | Katie Wood           |            |

|             |                                          |                           |            |
|-------------|------------------------------------------|---------------------------|------------|
| Basingstoke | Basingstoke and North Hampshire Hospital | Katie Wood                |            |
| Basingstoke | Basingstoke and North Hampshire Hospital | Rao Vuyyuru               |            |
| Basingstoke | Basingstoke and North Hampshire Hospital | Richard Shaffer           | PI         |
| Basingstoke | Basingstoke and North Hampshire Hospital | Sree Susaria              |            |
| Basingstoke | Basingstoke and North Hampshire Hospital | Teresa Guerrero-Urbano    |            |
| Basingstoke | Basingstoke and North Hampshire Hospital | Jo-Anna Conyngham         |            |
| Basingstoke | Basingstoke and North Hampshire Hospital | Jo-Anna Conyngham         |            |
| Basingstoke | Basingstoke and North Hampshire Hospital | Lauriane Kerwood          | Pharmacist |
| Basingstoke | Basingstoke and North Hampshire Hospital | Lorraine Poole            |            |
| Basingstoke | Basingstoke and North Hampshire Hospital | Louise Beattie            |            |
| Basingstoke | Basingstoke and North Hampshire Hospital | Rebecca Wills             | Pharmacist |
| Basingstoke | Basingstoke and North Hampshire Hospital | Zoe Finlay                |            |
| Basingstoke | Basingstoke and North Hampshire Hospital | Rachel Bryan              |            |
| Basingstoke | Basingstoke and North Hampshire Hospital | Duncan Cooke              |            |
| Basingstoke | Basingstoke and North Hampshire Hospital | Godfrey Bownie-Mukumbu    |            |
| Basingstoke | Basingstoke and North Hampshire Hospital | Roger Hudson              | Pharmacist |
| Basingstoke | Basingstoke and North Hampshire Hospital | Bintha Paruthickal        |            |
| Basingstoke | Basingstoke and North Hampshire Hospital | Catherine McLean          |            |
| Basingstoke | Basingstoke and North Hampshire Hospital | Jackie Smith              |            |
| Basingstoke | Basingstoke and North Hampshire Hospital | Nanda Basker              |            |
| Basingstoke | Basingstoke and North Hampshire Hospital | Pennie Porter             |            |
| Basingstoke | Basingstoke and North Hampshire Hospital | Abigail Edwards           |            |
| Basingstoke | Basingstoke and North Hampshire Hospital | Adrienn Fazekasne Fulep   |            |
| Basingstoke | Basingstoke and North Hampshire Hospital | Angela Frith              | Pharmacist |
| Basingstoke | Basingstoke and North Hampshire Hospital | Christine Podesta         |            |
| Basingstoke | Basingstoke and North Hampshire Hospital | Fasar Sarwar              |            |
| Basingstoke | Basingstoke and North Hampshire Hospital | Helen Richards            |            |
| Basingstoke | Basingstoke and North Hampshire Hospital | Victoria Corner           |            |
| Basingstoke | Basingstoke and North Hampshire Hospital | Carmen Wu                 | Pharmacist |
| Basingstoke | Basingstoke and North Hampshire Hospital | Catherine Rimington       |            |
| Basingstoke | Basingstoke and North Hampshire Hospital | Christina Narh            |            |
| Basingstoke | Basingstoke and North Hampshire Hospital | Claire Williams           |            |
| Basingstoke | Basingstoke and North Hampshire Hospital | Julie Gwilt               |            |
| Basingstoke | Basingstoke and North Hampshire Hospital | Kathryn Leach (nee Noake) |            |

|             |                                          |                      |            |
|-------------|------------------------------------------|----------------------|------------|
| Basingstoke | Basingstoke and North Hampshire Hospital | Liz Happle           |            |
| Basingstoke | Basingstoke and North Hampshire Hospital | Sara Fawcitt         |            |
| Bath        | Royal United Hospital                    | Abigail Gee          | Co-I       |
| Bath        | Royal United Hospital                    | Catherine McDonald   | Co-I       |
| Bath        | Royal United Hospital                    | Claire Dyke          |            |
| Bath        | Royal United Hospital                    | Frances Du Feu       |            |
| Bath        | Royal United Hospital                    | Georgina Gullick     | Co-I       |
| Bath        | Royal United Hospital                    | Ioana Fodor          |            |
| Bath        | Royal United Hospital                    | Kathryn Falconer     |            |
| Bath        | Royal United Hospital                    | Nathalie Webber      | Co-I       |
| Bath        | Royal United Hospital                    | Tom Wilson           | Co-I       |
| Bath        | Royal United Hospital                    | Abigail Jenner       |            |
| Bath        | Royal United Hospital                    | Chris Williams       |            |
| Bath        | Royal United Hospital                    | Christine Elwell     |            |
| Bath        | Royal United Hospital                    | Gareth Ayre          |            |
| Bath        | Royal United Hospital                    | Hugh Newman          |            |
| Bath        | Royal United Hospital                    | Lorna Hawley         |            |
| Bath        | Royal United Hospital                    | Mark Beresford       | PI         |
| Bath        | Royal United Hospital                    | Matthew Sephton      |            |
| Bath        | Royal United Hospital                    | Olivera Frim         | Co-I       |
| Bath        | Royal United Hospital                    | Penny Kehagioglou    |            |
| Bath        | Royal United Hospital                    | Susan Masson         |            |
| Bath        | Royal United Hospital                    | Abigail Pocock       |            |
| Bath        | Royal United Hospital                    | Claire Barron        |            |
| Bath        | Royal United Hospital                    | Jill MacDonald-Burn  | Pharmacist |
| Bath        | Royal United Hospital                    | Joanne Avis          |            |
| Bath        | Royal United Hospital                    | Leonie Harrison      |            |
| Bath        | Royal United Hospital                    | Rachael Bolitho      |            |
| Bath        | Royal United Hospital                    | Rachael Exley        |            |
| Bath        | Royal United Hospital                    | Samantha Williams    | Pharmacist |
| Bath        | Royal United Hospital                    | Shaolin Chidavaenzi  |            |
| Bath        | Royal United Hospital                    | Guillaume Livera     |            |
| Bath        | Royal United Hospital                    | Joseph Needham       |            |
| Bath        | Royal United Hospital                    | Roland Wynn-Williams |            |

|           |                                   |                            |            |
|-----------|-----------------------------------|----------------------------|------------|
| Bath      | Royal United Hospital             | Michael Daly               |            |
| Bath      | Royal United Hospital             | Tom Tylee                  |            |
| Bath      | Royal United Hospital             | Amy Singh                  |            |
| Bath      | Royal United Hospital             | Joanna Wilson              |            |
| Bath      | Royal United Hospital             | Kristelle Vassallo         |            |
| Bath      | Royal United Hospital             | Rowan Appleby              |            |
| Bath      | Royal United Hospital             | Vicki Portingale           |            |
| Bath      | Royal United Hospital             | Beatrice Hamilton          |            |
| Bath      | Royal United Hospital             | Carey Milsom (nee Logan)   |            |
| Bath      | Royal United Hospital             | Christine Cox              |            |
| Bath      | Royal United Hospital             | Kate Moloney               |            |
| Bath      | Royal United Hospital             | Ruth Brydon-Hill           |            |
| Bath      | Royal United Hospital             | Samantha Curtis            |            |
| Bath      | Royal United Hospital             | Sarah Murdoch              |            |
| Bath      | Royal United Hospital             | Yuko Francis               |            |
| Bath      | Royal United Hospital             | Agata Leonarska            |            |
| Bath      | Royal United Hospital             | Bryony Robertson           |            |
| Bath      | Royal United Hospital             | Carolina Juan Chofre       |            |
| Bath      | Royal United Hospital             | Claire Davis               |            |
| Bath      | Royal United Hospital             | Eve Tomlinson              |            |
| Bath      | Royal United Hospital             | Jane Crozier               |            |
| Bath      | Royal United Hospital             | Jess White                 |            |
| Bath      | Royal United Hospital             | Katarzyna Machura          |            |
| Bath      | Royal United Hospital             | Laura Cini                 |            |
| Bath      | Royal United Hospital             | Rebecca Wassall            |            |
| Bath      | Royal United Hospital             | Carly Laxon-Takooree       |            |
| Bath      | Royal United Hospital             | Claire Craige              |            |
| Bath      | Royal United Hospital             | Hannah Blades              |            |
| Bath      | Royal United Hospital             | Jackie Davies              |            |
| Bath      | Royal United Hospital             | Margaret Macmillan         | Pharmacist |
| Bath      | Royal United Hospital             | Vicki Clarke               |            |
| Bath      | Royal United Hospital             | Tania Williams (Née Allen) |            |
| Bebington | Clatterbridge Centre for Oncology | Amir Montazeri             |            |
| Bebington | Clatterbridge Centre for Oncology | Azman Ibrahim              | Co-I       |



|                |                                      |                           |            |
|----------------|--------------------------------------|---------------------------|------------|
| Bebington      | Clatterbridge Centre for Oncology    | Helen Innes               |            |
| Bebington      | Clatterbridge Centre for Oncology    | Isabel Syndikus           |            |
| Bebington      | Clatterbridge Centre for Oncology    | Peter Robson              |            |
| Bebington      | Clatterbridge Centre for Oncology    | Shaun Tolan               |            |
| Bebington      | Clatterbridge Centre for Oncology    | Zafar Malik               | PI         |
| Bebington      | Clatterbridge Centre for Oncology    | Elizabeth Gallimore       |            |
| Bebington      | Clatterbridge Centre for Oncology    | Jodie Henderson           |            |
| Bebington      | Clatterbridge Centre for Oncology    | Rachel Pritchard          |            |
| Bebington      | Clatterbridge Centre for Oncology    | Sarah Dalby               |            |
| Bebington      | Clatterbridge Centre for Oncology    | Emma Whitby               |            |
| Bebington      | Royal Liverpool University Hospital  | Emma Whitby               |            |
| Bebington      | Clatterbridge Centre for Oncology    | Laura McAllister          |            |
| Bebington      | Clatterbridge Centre for Oncology    | Ian Allen                 |            |
| bebington      | University Hospital Aintree          | Ian Allen                 |            |
| Bebington      | Clatterbridge Centre for Oncology    | Matthew Stott             |            |
| Bebington      | Clatterbridge Centre for Oncology    | Paul Griffiths            |            |
| Bebington      | Clatterbridge Centre for Oncology    | Priyank Patel             |            |
| Bebington      | Clatterbridge Centre for Oncology    | Burhan Zavery             | Pharmacist |
| Bebington      | Clatterbridge Centre for Oncology    | Wesley Artist             |            |
| Bebington      | Clatterbridge Centre for Oncology    | Annemieke Earnshaw        |            |
| Bebington      | Clatterbridge Centre for Oncology    | Elizabeth Harrison        |            |
| Bebington      | Clatterbridge Centre for Oncology    | Sharon Dunn (nee Johnson) |            |
| Bebington      | Clatterbridge Centre for Oncology    | Sue Green                 |            |
| Bebington      | Clatterbridge Centre for Oncology    | Diane Fildes              |            |
| Bebington      | Clatterbridge Centre for Oncology    | Helen Flint               | Pharmacist |
| Bebington      | Clatterbridge Centre for Oncology    | Sandra Robinson           | Pharmacist |
| Bebington      | Clatterbridge Centre for Oncology    | Caroline Dunn             |            |
| Bebington      | Clatterbridge Centre for Oncology    | Claire Harwood            |            |
| Bebington      | Clatterbridge Centre for Oncology    | Jess Hulse                |            |
| Bebington      | Clatterbridge Centre for Oncology    | Katie Sloan               |            |
| Bebington      | Clatterbridge Centre for Oncology    | Suzanne Maloney           |            |
| Bebington      | Clatterbridge Centre for Oncology    | Dawn Porter               |            |
| Bebington      | Clatterbridge Centre for Oncology    | Lisa Dobson (nee Child)   | Pharmacist |
| Beckett Street | St James University Hospital (Leeds) | Catherine Gray            |            |

|                |                                      |                    |      |
|----------------|--------------------------------------|--------------------|------|
| Beckett Street | St James University Hospital (Leeds) | Claire Daisey      |      |
| Belfast        | Belfast City Hospital                | Claire Rooney      |      |
| Belfast        | Belfast City Hospital                | Laura Feeney       |      |
| Belfast        | Belfast City Hospital                | Laura Mooney       |      |
| Belfast        | Belfast City Hospital                | Michael McMahon    |      |
| Belfast        | Belfast City Hospital                | Nicola Hill        |      |
| Belfast        | Belfast City Hospital                | Orla Houlihan      |      |
| Belfast        | Belfast City Hospital                | Patricia Calisaya  |      |
| Belfast        | Belfast City Hospital                | Peter Bryson       |      |
| Belfast        | Belfast City Hospital                | Phil Turner        |      |
| Belfast        | Belfast City Hospital                | Rachel Ellis       |      |
| Belfast        | Belfast City Hospital                | Sai Jonnada        |      |
| Belfast        | Belfast City Hospital                | Seosamh McCauley   |      |
| Belfast        | Belfast City Hospital                | Swati Ray          | Co-I |
| Belfast        | Belfast City Hospital                | Aiden Cole         |      |
| Belfast        | Belfast City Hospital                | Ciaran Fairmichael |      |
| Belfast        | Belfast City Hospital                | Darren Mitchell    |      |
| Belfast        | Belfast City Hospital                | David Stewart      |      |
| Belfast        | Belfast City Hospital                | Jackie Harney      |      |
| Belfast        | Belfast City Hospital                | Jonathan McAleese  |      |
| Belfast        | Belfast City Hospital                | Lois Mulholland    |      |
| Belfast        | Belfast City Hospital                | Lucy Jellett       |      |
| Belfast        | Belfast City Hospital                | Melvyn Ang         |      |
| Belfast        | Belfast City Hospital                | Paula McCloskey    |      |
| Belfast        | Belfast City Hospital                | Poh Lin Shum       | Co-I |
| Belfast        | Belfast City Hospital                | Prantik Das        |      |
| Belfast        | Belfast City Hospital                | Rebecca Goody      |      |
| Belfast        | Belfast City Hospital                | Rhun Evans         |      |
| Belfast        | Belfast City Hospital                | Ruth Eakin         |      |
| Belfast        | Belfast City Hospital                | Ruth Johnston      |      |
| Belfast        | Belfast City Hospital                | Salil Vengalil     |      |
| Belfast        | Belfast City Hospital                | Sarah McGahey      |      |
| Belfast        | Belfast City Hospital                | Stephen Stranex    |      |
| Belfast        | Belfast City Hospital                | Suneil Jain        | Co-I |

|         |                       |                           |            |
|---------|-----------------------|---------------------------|------------|
| Belfast | Belfast City Hospital | Aine McKeown              |            |
| Belfast | Belfast City Hospital | Alison Logie              |            |
| Belfast | Belfast City Hospital | Jemma Robinson            |            |
| Belfast | Belfast City Hospital | Karen McKenna             |            |
| Belfast | Belfast City Hospital | Benedict Dadebo           |            |
| Belfast | Belfast City Hospital | Keith Rooney              |            |
| Belfast | Belfast City Hospital | Michael Hanna             |            |
| Belfast | Belfast City Hospital | William Snelling          |            |
| Belfast | Belfast City Hospital | Chris Hagan               |            |
| Belfast | Belfast City Hospital | Jonathan Thompson         |            |
| Belfast | Belfast City Hospital | Patrick Keane             |            |
| Belfast | Belfast City Hospital | Peter Clarke              |            |
| Belfast | Belfast City Hospital | Ciara McIlmunn            |            |
| Belfast | Belfast City Hospital | Diane Law                 |            |
| Belfast | Belfast City Hospital | Ellen Brown               |            |
| Belfast | Belfast City Hospital | Fiona Tarpey              |            |
| Belfast | Belfast City Hospital | Karen Campfield           |            |
| Belfast | Belfast City Hospital | Kerry Nicholls            |            |
| Belfast | Belfast City Hospital | Margot Creighton          |            |
| Belfast | Belfast City Hospital | Eileen Dillon             |            |
| Belfast | Belfast City Hospital | Joanne McAllister         |            |
| Belfast | Belfast City Hospital | Kairen McCloy             |            |
| Belfast | Belfast City Hospital | Linda McNeice             | Pharmacist |
| Belfast | Belfast City Hospital | Lynsey Morrow             |            |
| Belfast | Belfast City Hospital | Stacey Hetherington       |            |
| Belfast | Belfast City Hospital | Wendy Cunningham          |            |
| Belfast | Belfast City Hospital | Adrina O'Donnell          |            |
| Belfast | Belfast City Hospital | Catherine Davidson        |            |
| Belfast | Belfast City Hospital | Chryelle McAlister        |            |
| Belfast | Belfast City Hospital | Grace Lavery              |            |
| Belfast | Belfast City Hospital | Karen Allen (nee Parsons) |            |
| Belfast | Belfast City Hospital | Sara McCusker(nee Stokes) |            |
| Belfast | Belfast City Hospital | Sharon McClean            |            |
| Belfast | Belfast City Hospital | Sophie Lynch              |            |

|            |                                             |                         |    |
|------------|---------------------------------------------|-------------------------|----|
| Belfast    | Belfast City Hospital                       | Aishleen Brunton        |    |
| Belfast    | Belfast City Hospital                       | Angela Morrison         |    |
| Belfast    | Belfast City Hospital                       | Angela Rosbotham        |    |
| Belfast    | Belfast City Hospital                       | Barbara Harvey          |    |
| Belfast    | Belfast City Hospital                       | Eimear Henry            |    |
| Belfast    | Belfast City Hospital                       | Emma Hanna              |    |
| Belfast    | Belfast City Hospital                       | Geraldine Douris        |    |
| Belfast    | Belfast City Hospital                       | Joanne Todd             |    |
| Belfast    | Belfast City Hospital                       | Mairead Devine          |    |
| Belfast    | Belfast City Hospital                       | Naomi Hill              |    |
| Belfast    | Belfast City Hospital                       | Ruth Boyd               |    |
| Belfast    | Belfast City Hospital                       | Sharon Hynds            |    |
| Belfast    | Belfast City Hospital                       | Shirley McKenna         |    |
| Belfast    | Belfast City Hospital                       | Joe O'Sullivan          | PI |
| Bellinzona | Istituto Oncologico della Svizzera Italiana | Gianfranco Pesce        |    |
| Bellinzona | Istituto Oncologico della Svizzera Italiana | Maria Delgrande         |    |
| Bellinzona | Istituto Oncologico della Svizzera Italiana | Ngwa Che Azinwi         |    |
| Bellinzona | Istituto Oncologico della Svizzera Italiana | Ricardo Pereira Mestre  | PI |
| Bellinzona | Istituto Oncologico della Svizzera Italiana | Vittoria Espeli         |    |
| Bellinzona | Istituto Oncologico della Svizzera Italiana | Carolina De Almeida     |    |
| Berne      | Inselspital (University Hospital Berne)     | Eloise Kremer           |    |
| Berne      | Inselspital (University Hospital Berne)     | Timo Nannen             |    |
| Berne      | Inselspital (University Hospital Berne)     | Beat Roth               |    |
| Berne      | Inselspital (University Hospital Berne)     | Simone Rimoldi          |    |
| Berne      | Inselspital (University Hospital Berne)     | Susan Meierhans         |    |
| Berne      | Inselspital (University Hospital Berne)     | Anselm Lafita           |    |
| Berne      | Inselspital (University Hospital Berne)     | Anna-Katharina Herrmann |    |
| Berne      | Inselspital (University Hospital Berne)     | Antje Ulrich            |    |
| Berne      | Inselspital (University Hospital Berne)     | Barbara Uhlmann         |    |
| Berne      | Inselspital (University Hospital Berne)     | Eloise Kremer           |    |
| Berne      | Inselspital (University Hospital Berne)     | Kathi Ochsner           |    |
| Berne      | Inselspital (University Hospital Berne)     | Daniel Aebersold        |    |
| Berne      | Inselspital (University Hospital Berne)     | Jörg Beyer              | PI |
| Berne      | Inselspital (University Hospital Berne)     | George Thalmann         |    |

|            |                                       |                          |      |
|------------|---------------------------------------|--------------------------|------|
| Biel       | Spitalzentrum Biel                    | Annette Winkler Vatter   |      |
| Biel       | Spitalzentrum Biel                    | Béatrice Zimmerli Schwab |      |
| Biel       | Spitalzentrum Biel                    | Eloise Kremer            |      |
| Biel       | Spitalzentrum Biel                    | Silvia Hanselmann        |      |
| Biel       | Spitalzentrum Biel                    | Markus Borner            | PI   |
| Birmingham | Queen Elizabeth Hospital (Birmingham) | Amarpal Bains            |      |
| Birmingham | Queen Elizabeth Hospital (Birmingham) | Arvind Tripathy          |      |
| Birmingham | Queen Elizabeth Hospital (Birmingham) | Daniel Henderson         |      |
| Birmingham | Birmingham Heartlands Hospital        | Frances Shaw             |      |
| Birmingham | Queen Elizabeth Hospital (Birmingham) | Jay Ansari               |      |
| Birmingham | City Hospital (Birmingham)            | Lalit Pallan             |      |
| Birmingham | City Hospital (Birmingham)            | Robert Stevenson         | Co-I |
| Birmingham | City Hospital (Birmingham)            | Sachin Trivedi           | Co-I |
| Birmingham | Queen Elizabeth Hospital (Birmingham) | Sameed Hussain           |      |
| Birmingham | Queen Elizabeth Hospital (Birmingham) | Sudha Karanam            |      |
| Birmingham | Queen Elizabeth Hospital (Birmingham) | Syed Tirmazy             |      |
| Birmingham | Queen Elizabeth Hospital (Birmingham) | Abel Zachariah           |      |
| Birmingham | Birmingham Heartlands Hospital        | Anjali Zarkar            | PI   |
| Birmingham | Queen Elizabeth Hospital (Birmingham) | Anjali Zarkar            |      |
| Birmingham | City Hospital (Birmingham)            | Daniel Ford              |      |
| Birmingham | Queen Elizabeth Hospital (Birmingham) | Daniel Ford              | Co-I |
| Birmingham | Queen Elizabeth Hospital (Birmingham) | David Fackrell           | PI   |
| Birmingham | City Hospital (Birmingham)            | Emilio Porfiri           | PI   |
| Birmingham | Queen Elizabeth Hospital (Birmingham) | Emilio Porfiri           | Co-I |
| Birmingham | Queen Elizabeth Hospital (Birmingham) | Erica Beaumont           |      |
| Birmingham | Queen Elizabeth Hospital (Birmingham) | Hannah Tween             |      |
| Birmingham | Queen Elizabeth Hospital (Birmingham) | Jenny Pascoe             |      |
| Birmingham | Queen Elizabeth Hospital (Birmingham) | Atiqa Ahmed              |      |
| Birmingham | Queen Elizabeth Hospital (Birmingham) | Charlotte Sabine         |      |
| Birmingham | Queen Elizabeth Hospital (Birmingham) | Charlotte Trinham        |      |
| Birmingham | Queen Elizabeth Hospital (Birmingham) | Daniella Lynch           |      |
| Birmingham | Queen Elizabeth Hospital (Birmingham) | Keia Spooner             |      |
| Birmingham | City Hospital (Birmingham)            | Laura Butler             |      |
| Birmingham | Queen Elizabeth Hospital (Birmingham) | Laura Butler             |      |

|            |                                       |                        |            |
|------------|---------------------------------------|------------------------|------------|
| Birmingham | Queen Elizabeth Hospital (Birmingham) | Laura Caley            |            |
| Birmingham | Queen Elizabeth Hospital (Birmingham) | Rosie Henvey           |            |
| Birmingham | Birmingham Heartlands Hospital        | Samarah Haq            |            |
| Birmingham | Birmingham Heartlands Hospital        | Sanya Shafiq           |            |
| Birmingham | Queen Elizabeth Hospital (Birmingham) | Sibil Fernandez        |            |
| Birmingham | Queen Elizabeth Hospital (Birmingham) | Stephanie Palmer       |            |
| Birmingham | Queen Elizabeth Hospital (Birmingham) | Zhane Peterkin         |            |
| Birmingham | Queen Elizabeth Hospital (Birmingham) | Andrew Palmer          |            |
| Birmingham | Queen Elizabeth Hospital (Birmingham) | Biruk Asfaw            |            |
| Birmingham | Queen Elizabeth Hospital (Birmingham) | Christopher McGhee     |            |
| Birmingham | Queen Elizabeth Hospital (Birmingham) | Fahd Niaz              |            |
| Birmingham | Birmingham Heartlands Hospital        | Michael Tarn           |            |
| Birmingham | Queen Elizabeth Hospital (Birmingham) | Richard Winter         |            |
| Birmingham | Queen Elizabeth Hospital (Birmingham) | Simon Horley           |            |
| Birmingham | City Hospital (Birmingham)            | Steven Shanu           | Pharmacist |
| Birmingham | Birmingham Heartlands Hospital        | Adrian Kelly           |            |
| Birmingham | City Hospital (Birmingham)            | Brian Gammon           |            |
| Birmingham | Birmingham Heartlands Hospital        | Chen Bartlett          | Pharmacist |
| Birmingham | Birmingham Heartlands Hospital        | James Whitehouse       |            |
| Birmingham | Queen Elizabeth Hospital (Birmingham) | Vijay Patel            |            |
| Birmingham | Queen Elizabeth Hospital (Birmingham) | Vishy Veeranna         |            |
| Birmingham | Queen Elizabeth Hospital (Birmingham) | Aliyah Mannan          |            |
| Birmingham | City Hospital (Birmingham)            | Amy Orme               |            |
| Birmingham | City Hospital (Birmingham)            | Debbie Devonport       |            |
| Birmingham | Queen Elizabeth Hospital (Birmingham) | Fiona Evans            |            |
| Birmingham | Queen Elizabeth Hospital (Birmingham) | Golaleh McGinnell      |            |
| Birmingham | Queen Elizabeth Hospital (Birmingham) | Gullinder Jokhi        |            |
| Birmingham | Queen Elizabeth Hospital (Birmingham) | Karen Tester           |            |
| Birmingham | Queen Elizabeth Hospital (Birmingham) | Kathryn Adams          |            |
| Birmingham | Queen Elizabeth Hospital (Birmingham) | Lea Booth              |            |
| Birmingham | Birmingham Heartlands Hospital        | Madhura Chandrashekara |            |
| Birmingham | Queen Elizabeth Hospital (Birmingham) | Michelle Bates         |            |
| Birmingham | Queen Elizabeth Hospital (Birmingham) | Nasreen Akhtar         |            |
| Birmingham | Queen Elizabeth Hospital (Birmingham) | Nicola Betteridge      |            |

|            |                                       |                         |
|------------|---------------------------------------|-------------------------|
| Birmingham | Queen Elizabeth Hospital (Birmingham) | Parminder Sohal         |
| Birmingham | Birmingham Heartlands Hospital        | Ellen Drew              |
| Birmingham | City Hospital (Birmingham)            | Joanne Dasgin           |
| Birmingham | Queen Elizabeth Hospital (Birmingham) | Pamela Jones            |
| Birmingham | City Hospital (Birmingham)            | Alice Longe             |
| Birmingham | Queen Elizabeth Hospital (Birmingham) | Alice Longe             |
| Birmingham | Queen Elizabeth Hospital (Birmingham) | Alison Grant            |
| Birmingham | Queen Elizabeth Hospital (Birmingham) | Amanda Davies           |
| Birmingham | Queen Elizabeth Hospital (Birmingham) | Amisha Desai            |
| Birmingham | Queen Elizabeth Hospital (Birmingham) | Amna Shah               |
| Birmingham | Birmingham Heartlands Hospital        | Ann Schumacher          |
| Birmingham | Birmingham Heartlands Hospital        | Arlene Oldan            |
| Birmingham | Queen Elizabeth Hospital (Birmingham) | Emma Bruce              |
| Birmingham | Queen Elizabeth Hospital (Birmingham) | Hannah Tolson           |
| Birmingham | Queen Elizabeth Hospital (Birmingham) | Heather Jones           |
| Birmingham | Queen Elizabeth Hospital (Birmingham) | Helen Jones             |
| Birmingham | Queen Elizabeth Hospital (Birmingham) | Helen Preston           |
| Birmingham | Birmingham Heartlands Hospital        | Janet Prentice          |
| Birmingham | City Hospital (Birmingham)            | Jasbinder Kaur          |
| Birmingham | Queen Elizabeth Hospital (Birmingham) | Jenny Hiley             |
| Birmingham | Birmingham Heartlands Hospital        | Jill Lyons              |
| Birmingham | Birmingham Heartlands Hospital        | Julia Sampson           |
| Birmingham | Birmingham Heartlands Hospital        | Kamaldeep Ajimal        |
| Birmingham | Queen Elizabeth Hospital (Birmingham) | Lisa Thomas             |
| Birmingham | Birmingham Heartlands Hospital        | Lisa - Marie Brueton    |
| Birmingham | Queen Elizabeth Hospital (Birmingham) | Mahmoda Begum           |
| Birmingham | Queen Elizabeth Hospital (Birmingham) | Maria Bandeira          |
| Birmingham | Queen Elizabeth Hospital (Birmingham) | Nicola Anderson         |
| Birmingham | Queen Elizabeth Hospital (Birmingham) | Salma Afzal             |
| Birmingham | Queen Elizabeth Hospital (Birmingham) | Sam Hopkins (nee Poole) |
| Birmingham | Queen Elizabeth Hospital (Birmingham) | Sara Diffley            |
| Birmingham | Queen Elizabeth Hospital (Birmingham) | Shaleen Bishop          |
| Birmingham | Queen Elizabeth Hospital (Birmingham) | Sharon Holmes           |
| Birmingham | Queen Elizabeth Hospital (Birmingham) | Tracy Soulsby           |

|            |                                       |                            |            |
|------------|---------------------------------------|----------------------------|------------|
| Birmingham | Queen Elizabeth Hospital (Birmingham) | Trish Brady                |            |
| Birmingham | Birmingham Heartlands Hospital        | Alison Maidment            | Pharmacist |
| Birmingham | City Hospital (Birmingham)            | Angela Williams            |            |
| Birmingham | Queen Elizabeth Hospital (Birmingham) | Claire Brown               |            |
| Birmingham | Queen Elizabeth Hospital (Birmingham) | Claire Draycott            |            |
| Birmingham | Queen Elizabeth Hospital (Birmingham) | Fiona Catherine Stead      |            |
| Birmingham | Queen Elizabeth Hospital (Birmingham) | Fiona Catherine Stead      |            |
| Birmingham | Queen Elizabeth Hospital (Birmingham) | Gemma Cole                 |            |
| Birmingham | City Hospital (Birmingham)            | Harriet Goddard            |            |
| Birmingham | Queen Elizabeth Hospital (Birmingham) | Helen Clarke               |            |
| Birmingham | Queen Elizabeth Hospital (Birmingham) | Jane Cook                  |            |
| Birmingham | Queen Elizabeth Hospital (Birmingham) | Joanna Gray (nee Finney)   |            |
| Birmingham | City Hospital (Birmingham)            | Julie Simpson              | Pharmacist |
| Birmingham | City Hospital (Birmingham)            | Marion Tatman              |            |
| Birmingham | Birmingham Heartlands Hospital        | Mary (Ellen) Drew          |            |
| Birmingham | Birmingham Heartlands Hospital        | Penny Goodby (nee Harbach) |            |
| Birmingham | Queen Elizabeth Hospital (Birmingham) | Rosemarie Seadon           | Pharmacist |
| Birmingham | City Hospital (Birmingham)            | Yin May Chin               |            |
| Birmingham | Queen Elizabeth Hospital (Birmingham) | Nicholas James             | PI         |
| Blackburn  | Royal Blackburn Hospital              | Ahmed Salah                |            |
| Blackburn  | Royal Blackburn Hospital              | Alexandra Ferrera          |            |
| Blackburn  | Royal Blackburn Hospital              | Andrew Brocklehurst        |            |
| Blackburn  | Royal Blackburn Hospital              | Anthea Cree                |            |
| Blackburn  | Royal Blackburn Hospital              | Danya Abdulwahid           |            |
| Blackburn  | Royal Blackburn Hospital              | Ilyas Ahmed                |            |
| Blackburn  | Royal Blackburn Hospital              | Jasima Latif               |            |
| Blackburn  | Royal Blackburn Hospital              | Jennifer King              |            |
| Blackburn  | Royal Blackburn Hospital              | Karan Patel                |            |
| Blackburn  | Royal Blackburn Hospital              | Omi Parikh                 | PI         |
| Blackburn  | Royal Blackburn Hospital              | Parth Desai                |            |
| Blackburn  | Royal Blackburn Hospital              | Prasad Kellati             |            |
| Blackburn  | Royal Blackburn Hospital              | Richard Walshaw            |            |
| Blackburn  | Royal Blackburn Hospital              | Sophia Callaghan           |            |
| Blackburn  | Royal Blackburn Hospital              | Sophie Raby                | Co-I       |



|           |                          |                     |            |
|-----------|--------------------------|---------------------|------------|
| Blackburn | Royal Blackburn Hospital | Twesige Mugisa      |            |
| Blackburn | Royal Blackburn Hospital | William Croxford    |            |
| Blackburn | Royal Blackburn Hospital | Zhu Oong            | Co-I       |
| Blackburn | Royal Blackburn Hospital | Ajay Mehta          |            |
| Blackburn | Royal Blackburn Hospital | Deborah Williamson  |            |
| Blackburn | Royal Blackburn Hospital | Falalu Danwata      |            |
| Blackburn | Royal Blackburn Hospital | Graham Read         |            |
| Blackburn | Royal Blackburn Hospital | Imran Haidar        |            |
| Blackburn | Royal Blackburn Hospital | Marcus Wise         |            |
| Blackburn | Royal Blackburn Hospital | Ruth Conroy         |            |
| Blackburn | Royal Blackburn Hospital | Tanmay Mukhopadhyay |            |
| Blackburn | Royal Blackburn Hospital | Win Soe             |            |
| Blackburn | Royal Blackburn Hospital | Zia Rehman          |            |
| Blackburn | Royal Blackburn Hospital | Rizwana Hussain     | Pharmacist |
| Blackburn | Royal Blackburn Hospital | Ana Batista         | Pharmacist |
| Blackburn | Royal Blackburn Hospital | Farrah Burrows      |            |
| Blackburn | Royal Blackburn Hospital | Fatima Butt         |            |
| Blackburn | Royal Blackburn Hospital | Humairaa Timol      |            |
| Blackburn | Royal Blackburn Hospital | Naomi Charlton      |            |
| Blackburn | Royal Blackburn Hospital | Bethany Fielding    |            |
| Blackburn | Royal Blackburn Hospital | Andrew Hunnisett    |            |
| Blackburn | Royal Blackburn Hospital | Andrew Lancaster    |            |
| Blackburn | Royal Blackburn Hospital | Darren Rusk         | Pharmacist |
| Blackburn | Royal Blackburn Hospital | James Grunshaw      |            |
| Blackburn | Royal Blackburn Hospital | Joseph Dykes        |            |
| Blackburn | Royal Blackburn Hospital | Matthew Lovell      |            |
| Blackburn | Royal Blackburn Hospital | Nicholas Pounder    |            |
| Blackburn | Royal Blackburn Hospital | Stephen Kilroy      |            |
| Blackburn | Royal Blackburn Hospital | Dayle Squires       |            |
| Blackburn | Royal Blackburn Hospital | Hani Hanna          | Pharmacist |
| Blackburn | Royal Blackburn Hospital | Alison Blackburn    |            |
| Blackburn | Royal Blackburn Hospital | Deborah Smith       |            |
| Blackburn | Royal Blackburn Hospital | Farzana Patel       |            |
| Blackburn | Burnley General Hospital | Jacqueline Thomas   |            |

|           |                          |                        |            |
|-----------|--------------------------|------------------------|------------|
| Blackburn | Royal Blackburn Hospital | Jacqueline Thomas      |            |
| Blackburn | Royal Blackburn Hospital | Kathryn Hayes          |            |
| Blackburn | Burnley General Hospital | Lynsey Waring          |            |
| Blackburn | Royal Blackburn Hospital | Lynsey Waring          |            |
| Blackburn | Royal Blackburn Hospital | Angela Hugill          |            |
| Blackburn | Royal Blackburn Hospital | Helen Frankland        |            |
| Blackburn | Royal Blackburn Hospital | Janet Ryan-Smith       |            |
| Blackburn | Royal Blackburn Hospital | Sue Ashworth           |            |
| Blackburn | Royal Blackburn Hospital | Alexandra McCarrick    |            |
| Blackburn | Royal Blackburn Hospital | Christina Robinson     |            |
| Blackburn | Royal Blackburn Hospital | Debbie Sutton          | Pharmacist |
| Blackburn | Royal Blackburn Hospital | Gaynor Bowen           |            |
| Blackburn | Royal Blackburn Hospital | Jackie Carey           |            |
| Blackburn | Royal Blackburn Hospital | Jackie Nuttall         |            |
| Blackburn | Royal Blackburn Hospital | Jan Flaherty           |            |
| Blackburn | Royal Blackburn Hospital | Jennifer McCallum      |            |
| Blackburn | Royal Blackburn Hospital | Jenny Cockerill-Taylor |            |
| Blackburn | Royal Blackburn Hospital | Jessica Whiston        |            |
| Blackburn | Royal Blackburn Hospital | Marianna Theodoulou    |            |
| Blackburn | Royal Blackburn Hospital | Maricica Zabrautanu    |            |
| Blackburn | Royal Blackburn Hospital | Philippa Springle      |            |
| Blackburn | Royal Blackburn Hospital | Rachel Bolton          |            |
| Blackburn | Royal Blackburn Hospital | Samatha Guy            |            |
| Blackburn | Royal Blackburn Hospital | Sarah Ainsworth        |            |
| Blackburn | Burnley General Hospital | Sarah Keith            |            |
| Blackburn | Royal Blackburn Hospital | Sarah Keith            |            |
| Blackburn | Royal Blackburn Hospital | Tracey Kilduff         |            |
| Blackburn | Royal Blackburn Hospital | Victoria Taylor        | Pharmacist |
| Blackburn | Royal Blackburn Hospital | Diane Forrest          |            |
| Blackburn | Royal Blackburn Hospital | Hazel Aston            |            |
| Blackburn | Royal Blackburn Hospital | Helene Chorley         |            |
| Blackburn | Royal Blackburn Hospital | Jeanette Hargreaves    |            |
| Blackburn | Royal Blackburn Hospital | Karen Beard            |            |
| Blackburn | Royal Blackburn Hospital | Karen Jewers           |            |

|           |                          |                            |            |
|-----------|--------------------------|----------------------------|------------|
| Blackburn | Royal Blackburn Hospital | Vivienne Tickle            |            |
| Bolton    | Royal Bolton Hospital    | Ajay Mehta                 |            |
| Bolton    | Royal Bolton Hospital    | Tony Elliott               |            |
| Bolton    | Royal Bolton Hospital    | Karen Lee                  | Pharmacist |
| Bolton    | Royal Bolton Hospital    | Gillian Mobb               |            |
| Bolton    | Royal Bolton Hospital    | Ling Lee                   | PI         |
| Bolton    | Royal Bolton Hospital    | Hemant Patel               |            |
| Bolton    | Royal Bolton Hospital    | Michael Pantelides         |            |
| Bolton    | Royal Bolton Hospital    | Richard Jones              |            |
| Bolton    | Royal Bolton Hospital    | Robert Hull                |            |
| Bolton    | Royal Bolton Hospital    | Janet Keegan               |            |
| Bolton    | Royal Bolton Hospital    | Shirley Cocks              |            |
| Bolton    | Royal Bolton Hospital    | Charlotte Lever            |            |
| Bolton    | Royal Bolton Hospital    | Debbie Forkin              |            |
| Bolton    | Royal Bolton Hospital    | Janine Hurst               |            |
| Bolton    | Royal Bolton Hospital    | Julie Chadwick             |            |
| Bolton    | Royal Bolton Hospital    | Louise Dawson              |            |
| Bolton    | Royal Bolton Hospital    | Raksha Mistry              |            |
| Bolton    | Royal Bolton Hospital    | Sally Shaw                 | Pharmacist |
| Bolton    | Royal Bolton Hospital    | Zoe Gall                   |            |
| Bolton    | Royal Bolton Hospital    | Collette Hunt              | Pharmacist |
| Bolton    | Royal Bolton Hospital    | Karen Jewers               |            |
| Bolton    | Royal Bolton Hospital    | Lindsay Rawlinson          | Pharmacist |
| Boston    | Pilgrim Hospital         | Ana Fernandez-Ots          | Co-I       |
| Boston    | Pilgrim Hospital         | Andrew Sloan               |            |
| Boston    | Pilgrim Hospital         | Christian Arias            | Co-I       |
| Boston    | Pilgrim Hospital         | David Ballesteros-Quintail | Co-I       |
| Boston    | Pilgrim Hospital         | Sekar (DV) Kittappa        | Co-I       |
| Boston    | Pilgrim Hospital         | Sindhu Ramamurthy          |            |
| Boston    | Pilgrim Hospital         | Miguel Panades             | PI         |
| Boston    | Pilgrim Hospital         | Prantik Das                |            |
| Boston    | Pilgrim Hospital         | Eileen Busby               |            |
| Boston    | Pilgrim Hospital         | Gunjan Phalod              |            |
| Boston    | Pilgrim Hospital         | Karen Metcalf              |            |

|             |                            |                               |            |
|-------------|----------------------------|-------------------------------|------------|
| Boston      | Pilgrim Hospital           | Sally Ann Molsher             |            |
| Boston      | Pilgrim Hospital           | Andrew Judd                   |            |
| Boston      | Pilgrim Hospital           | Simon Archer                  |            |
| Boston      | Pilgrim Hospital           | Beverley Mashegede            |            |
| Boston      | Pilgrim Hospital           | Isobel Thomas                 |            |
| Boston      | Pilgrim Hospital           | Kimberley Netherton           |            |
| Boston      | Pilgrim Hospital           | Kinga Szymiczek               |            |
| Boston      | Pilgrim Hospital           | Laura Walsh                   |            |
| Boston      | Pilgrim Hospital           | Kerry Pettitt                 |            |
| Boston      | Pilgrim Hospital           | Victoria Knight (n. Sherburn) |            |
| Boston      | Pilgrim Hospital           | Amanda Roper                  |            |
| Boston      | Pilgrim Hospital           | Amy Kirkby                    |            |
| Boston      | Pilgrim Hospital           | Giuseppe Banna                |            |
| Boston      | Pilgrim Hospital           | Helen Carolan                 |            |
| Boston      | Pilgrim Hospital           | Helen Palmer                  | Pharmacist |
| Boston      | Pilgrim Hospital           | Jayne Borley                  | Pharmacist |
| Boston      | Pilgrim Hospital           | Jenny Salmon                  |            |
| Boston      | Pilgrim Hospital           | Jo Fletcher                   |            |
| Boston      | Pilgrim Hospital           | Rebecca Spencer               | Pharmacist |
| Boston      | Pilgrim Hospital           | Tara Lawrence nee Palmer      |            |
| Boston      | Pilgrim Hospital           | Alice Latty                   |            |
| Boston      | Pilgrim Hospital           | Anita Young                   |            |
| Boston      | Pilgrim Hospital           | Bryony Saint                  |            |
| Boston      | Pilgrim Hospital           | Carol Lockwood                |            |
| Boston      | Pilgrim Hospital           | Trish Tsuro                   |            |
| Bournemouth | Royal Bournemouth Hospital | Kenneth Oguejiofor            |            |
| Bournemouth | Royal Bournemouth Hospital | Matthew Roberts               |            |
| Bournemouth | Royal Bournemouth Hospital | Deborah Hands                 |            |
| Bournemouth | Royal Bournemouth Hospital | George Astras                 |            |
| Bournemouth | Royal Bournemouth Hospital | Joe Davies                    |            |
| Bournemouth | Royal Bournemouth Hospital | Rao Vuyyuru                   |            |
| Bournemouth | Royal Bournemouth Hospital | Sue Brock                     | PI         |
| Bournemouth | Royal Bournemouth Hospital | Tom Geldart                   | Co-I       |
| Bournemouth | Royal Bournemouth Hospital | Julie Thomson                 |            |

|             |                            |                      |            |
|-------------|----------------------------|----------------------|------------|
| Bournemouth | Royal Bournemouth Hospital | Laura Purandare      |            |
| Bournemouth | Royal Bournemouth Hospital | Mirela Mukaj         |            |
| Bournemouth | Royal Bournemouth Hospital | Natasha Ottley       |            |
| Bournemouth | Royal Bournemouth Hospital | Taslima Rabbi        |            |
| Bournemouth | Royal Bournemouth Hospital | Alison Hogan         | Pharmacist |
| Bournemouth | Royal Bournemouth Hospital | Rachel Bower         |            |
| Bournemouth | Royal Bournemouth Hospital | Ben Loat             |            |
| Bournemouth | Royal Bournemouth Hospital | Cameron Huck         |            |
| Bournemouth | Royal Bournemouth Hospital | David Chrastek       |            |
| Bournemouth | Royal Bournemouth Hospital | Joseph Cavill        |            |
| Bournemouth | Royal Bournemouth Hospital | Luke Vamplew         |            |
| Bournemouth | Royal Bournemouth Hospital | Carlton Rowlands     |            |
| Bournemouth | Royal Bournemouth Hospital | Roger Hudson         |            |
| Bournemouth | Royal Bournemouth Hospital | Emma Sharland        |            |
| Bournemouth | Royal Bournemouth Hospital | Joanne Sheppard      |            |
| Bournemouth | Royal Bournemouth Hospital | Cathie Purnell       |            |
| Bournemouth | Royal Bournemouth Hospital | Linda Purandare      |            |
| Bournemouth | Royal Bournemouth Hospital | Min Wu               |            |
| Bournemouth | Royal Bournemouth Hospital | Katherine Major      |            |
| Bournemouth | Royal Bournemouth Hospital | Lynsey Houlton       |            |
| Bournemouth | Royal Bournemouth Hospital | Rebecca Miln         |            |
| Bournemouth | Royal Bournemouth Hospital | Sarah Savage         |            |
| Bournemouth | Royal Bournemouth Hospital | Sophie Jackson       |            |
| Bournemouth | Royal Bournemouth Hospital | Stephanie Jones      |            |
| Bournemouth | Royal Bournemouth Hospital | Tiffany Joyce        |            |
| Bournemouth | Royal Bournemouth Hospital | Eve Broadley         |            |
| Bournemouth | Royal Bournemouth Hospital | Kate Preece          |            |
| Bournemouth | Royal Bournemouth Hospital | Natalya Boyd         |            |
| Bradford    | Bradford Royal Infirmary   | Adel Jebar           | Co-I       |
| Bradford    | Bradford Royal Infirmary   | Andrew Viggars       | Co-I       |
| Bradford    | Bradford Royal Infirmary   | Ann Henry            |            |
| Bradford    | Bradford Royal Infirmary   | Anthi Zeniou         |            |
| Bradford    | Bradford Royal Infirmary   | Catherine Handforth  |            |
| Bradford    | Bradford Royal Infirmary   | Charlotte Richardson |            |

|          |                          |                      |            |
|----------|--------------------------|----------------------|------------|
| Bradford | Bradford Royal Infirmary | Christopher Williams |            |
| Bradford | Bradford Royal Infirmary | Eldho Joseph         | Co-I       |
| Bradford | Bradford Royal Infirmary | Emily Montague       |            |
| Bradford | Bradford Royal Infirmary | Finbar Slevin        |            |
| Bradford | Bradford Royal Infirmary | Ian Boon             |            |
| Bradford | Bradford Royal Infirmary | Jessica Pearce       | Co-I       |
| Bradford | Bradford Royal Infirmary | Leila Koudsi         |            |
| Bradford | Bradford Royal Infirmary | Louise Karsera       | Co-I       |
| Bradford | Bradford Royal Infirmary | Love Goyal           |            |
| Bradford | Bradford Royal Infirmary | Lucy Jones           | Co-I       |
| Bradford | Bradford Royal Infirmary | Lucy Ward            |            |
| Bradford | Bradford Royal Infirmary | Manjusha Soni        | Co-I       |
| Bradford | Bradford Royal Infirmary | Reem Mahmood         |            |
| Bradford | Bradford Royal Infirmary | Sally Martin         | Co-I       |
| Bradford | Bradford Royal Infirmary | Samuel Briggs        |            |
| Bradford | Bradford Royal Infirmary | Simon Brown          | PI         |
| Bradford | Bradford Royal Infirmary | Sohail Mughal        | Co-I       |
| Bradford | Bradford Royal Infirmary | Sree Rodda           |            |
| Bradford | Bradford Royal Infirmary | Carmel Loughrey      |            |
| Bradford | Bradford Royal Infirmary | Dan Lee              |            |
| Bradford | Bradford Royal Infirmary | Ganesan Jeyasangar   |            |
| Bradford | Bradford Royal Infirmary | Jamal Zekri          |            |
| Bradford | Bradford Royal Infirmary | Sue Cheeseman        |            |
| Bradford | St Luke's (Bradford)     | Susan Cheeseman      |            |
| Bradford | Bradford Royal Infirmary | You Yone             |            |
| Bradford | Bradford Royal Infirmary | Eleanor Waldron      |            |
| Bradford | Bradford Royal Infirmary | Jannika Lazarte      |            |
| Bradford | Bradford Royal Infirmary | Lucille Kenyon       |            |
| Bradford | Bradford Royal Infirmary | Qamar Akbar          |            |
| Bradford | Bradford Royal Infirmary | Declan Ryan-Wakeling |            |
| Bradford | Bradford Royal Infirmary | Kelvin Stewart       |            |
| Bradford | Bradford Royal Infirmary | Leslie Masters       |            |
| Bradford | Bradford Royal Infirmary | Umair Hamid          | Pharmacist |
| Bradford | Bradford Royal Infirmary | Mohammed Patel       |            |

|          |                              |                         |            |
|----------|------------------------------|-------------------------|------------|
| Bradford | Bradford Royal Infirmary     | Osman Chohan            | Pharmacist |
| Bradford | Bradford Royal Infirmary     | Richard Benton          |            |
| Bradford | Bradford Royal Infirmary     | Carol Firth             |            |
| Bradford | Bradford Royal Infirmary     | Dawn McNulty            |            |
| Bradford | Bradford Royal Infirmary     | Helen Wilson            |            |
| Bradford | Bradford Royal Infirmary     | Kay Cockroft            |            |
| Bradford | Bradford Royal Infirmary     | Manitha Vinod           |            |
| Bradford | Bradford Royal Infirmary     | Wendy Cardozo           |            |
| Bradford | Bradford Royal Infirmary     | Hayley Inman            |            |
| Bradford | Bradford Royal Infirmary     | Jane Sewell             |            |
| Bradford | Bradford Royal Infirmary     | Sarah Tinker            |            |
| Bradford | Bradford Royal Infirmary     | Chandran Nallathambi    |            |
| Bradford | Bradford Royal Infirmary     | Charlotte Johnson-Smith |            |
| Bradford | Bradford Royal Infirmary     | Elizabeth McIntosh      |            |
| Bradford | Bradford Royal Infirmary     | Gail Opio-Te            |            |
| Bradford | Bradford Royal Infirmary     | Jacqueline Quantrill    |            |
| Bradford | Bradford Royal Infirmary     | Kim Storton             |            |
| Bradford | Bradford Royal Infirmary     | Robina Ghulam           |            |
| Bradford | Bradford Royal Infirmary     | Shefali Parikh          |            |
| Bradford | Bradford Royal Infirmary     | Susan Shorter           |            |
| Bradford | Bradford Royal Infirmary     | Victoria Drew           |            |
| Bradford | Bradford Royal Infirmary     | Anne Marie Kay          |            |
| Bradford | Bradford Royal Infirmary     | Laura Jaques            |            |
| Bradford | Bradford Royal Infirmary     | Linda Bamford           |            |
| Bradford | Bradford Royal Infirmary     | Sophia Khan             |            |
| Bradford | Bradford Royal Infirmary     | Sophie Stephenson       |            |
| Brighton | Royal Sussex County Hospital | Ashok Nikapota          |            |
| Brighton | Royal Sussex County Hospital | Aun Mohammad            |            |
| Brighton | Royal Sussex County Hospital | George Plantaniotis     |            |
| Brighton | Royal Sussex County Hospital | Angus Robinson          | PI         |
| Brighton | Royal Sussex County Hospital | Daniel Henderson        |            |
| Brighton | Royal Sussex County Hospital | David Bloomfield        |            |
| Brighton | Royal Sussex County Hospital | George Devtsch          |            |
| Brighton | Royal Sussex County Hospital | George Plataniotis      | Co-I       |

|          |                              |                      |            |
|----------|------------------------------|----------------------|------------|
| Brighton | Royal Sussex County Hospital | Jackie Sham          |            |
| Brighton | Royal Sussex County Hospital | Marie Wilkins        |            |
| Brighton | Royal Sussex County Hospital | Tarun Durga          |            |
| Brighton | Royal Sussex County Hospital | Vivien Tse           |            |
| Brighton | Royal Sussex County Hospital | Angela Man           |            |
| Brighton | Royal Sussex County Hospital | Catherine Hunter     |            |
| Brighton | Royal Sussex County Hospital | Chritianne Whitfield |            |
| Brighton | Royal Sussex County Hospital | Lisa Furnival        |            |
| Brighton | Royal Sussex County Hospital | Rachel Rose Edmunds  |            |
| Brighton | Royal Sussex County Hospital | Samantha Hodges      |            |
| Brighton | Royal Sussex County Hospital | Summer Ibrahim       |            |
| Brighton | Royal Sussex County Hospital | Jean Tremlett        |            |
| Brighton | Royal Sussex County Hospital | Andrew Hart          |            |
| Brighton | Royal Sussex County Hospital | Matthew Seal         |            |
| Brighton | Royal Sussex County Hospital | Paul Frattaroli      |            |
| Brighton | Royal Sussex County Hospital | Sebastien Martin     |            |
| Brighton | Royal Sussex County Hospital | Tiago Rodrigues      |            |
| Brighton | Royal Sussex County Hospital | Simon Matthews       |            |
| Brighton | Royal Sussex County Hospital | Stephen Brown        |            |
| Brighton | Royal Sussex County Hospital | Caroline Walker      |            |
| Brighton | Royal Sussex County Hospital | Dorota Bak-Blaz      |            |
| Brighton | Royal Sussex County Hospital | Karen Walker         |            |
| Brighton | Royal Sussex County Hospital | Emma Foreman         | Pharmacist |
| Brighton | Royal Sussex County Hospital | Alison Porges        |            |
| Brighton | Royal Sussex County Hospital | Amy Murray           |            |
| Brighton | Royal Sussex County Hospital | Annie Oliver         |            |
| Brighton | Royal Sussex County Hospital | Elizabeth Corbett    |            |
| Brighton | Royal Sussex County Hospital | Jane Peterson        |            |
| Brighton | Royal Sussex County Hospital | Joanne Magennis      |            |
| Brighton | Royal Sussex County Hospital | Jodie Smith          |            |
| Brighton | Royal Sussex County Hospital | Katie Langford       |            |
| Brighton | Royal Sussex County Hospital | Lucy Curtis          |            |
| Brighton | Royal Sussex County Hospital | Poppy Lavender       |            |
| Brighton | Royal Sussex County Hospital | Ranee Lactao         |            |



|          |                                       |                     |            |
|----------|---------------------------------------|---------------------|------------|
| Brighton | Royal Sussex County Hospital          | Bobbie Yoong        |            |
| Brighton | Royal Sussex County Hospital          | Elaine Noon         |            |
| Brighton | Royal Sussex County Hospital          | Helen Mitchell      |            |
| Brighton | Royal Sussex County Hospital          | Jane Dexter         |            |
| Brighton | Royal Sussex County Hospital          | Jane Hanson         |            |
| Brighton | Royal Sussex County Hospital          | Julie Smith         |            |
| Brighton | Royal Sussex County Hospital          | Kirsty Bracewell    |            |
| Brighton | Royal Sussex County Hospital          | Lisa Barrott        |            |
| Brighton | Royal Sussex County Hospital          | Maggie Cole         |            |
| Brighton | Royal Sussex County Hospital          | Monika Musiol       |            |
| Brighton | Royal Sussex County Hospital          | Pauline Martin      |            |
| Brighton | Royal Sussex County Hospital          | Sue Trotter         |            |
| Brighton | Royal Sussex County Hospital          | Tamsin Kent         |            |
| Brighton | Royal Sussex County Hospital          | Tenesa Sargent      |            |
| Brighton | Royal Sussex County Hospital          | Victoria Sellick    |            |
| Bristol  | Bristol Haematology & Oncology Centre | Amit Bahl           | PI         |
| Bristol  | Bristol Haematology & Oncology Centre | Chris Herbert       |            |
| Bristol  | Bristol Haematology & Oncology Centre | Emily Foulstone     |            |
| Bristol  | Bristol Haematology & Oncology Centre | Hugh Newman         |            |
| Bristol  | Bristol Haematology & Oncology Centre | Jyothsna Chennupati |            |
| Bristol  | Bristol Haematology & Oncology Centre | Mark Beresford      |            |
| Bristol  | Bristol Haematology & Oncology Centre | Paula Wilson        |            |
| Bristol  | Bristol Haematology & Oncology Centre | Serena Hilman       |            |
| Bristol  | Bristol Haematology & Oncology Centre | Susan Masson        |            |
| Bristol  | Bristol Haematology & Oncology Centre | Eve Watson          |            |
| Bristol  | Bristol Haematology & Oncology Centre | Kay Drury           |            |
| Bristol  | Bristol Haematology & Oncology Centre | Azeem Arshad        |            |
| Bristol  | Bristol Haematology & Oncology Centre | Nick Robins         |            |
| Bristol  | Bristol Haematology & Oncology Centre | Sibusiso Dhladhla   |            |
| Bristol  | Bristol Haematology & Oncology Centre | Harvey Dymond       |            |
| Bristol  | Bristol Haematology & Oncology Centre | Ian Penwarden       | Pharmacist |
| Bristol  | Bristol Haematology & Oncology Centre | Lloyd Abood         |            |
| Bristol  | Bristol Haematology & Oncology Centre | Marc Coe            |            |
| Bristol  | Bristol Haematology & Oncology Centre | Robert Hollister    |            |

|         |                                       |                             |            |
|---------|---------------------------------------|-----------------------------|------------|
| Bristol | Bristol Haematology & Oncology Centre | Stephen Lang                |            |
| Bristol | Bristol Haematology & Oncology Centre | Tristan Grey                |            |
| Bristol | Bristol Haematology & Oncology Centre | Shalini Mohan               |            |
| Bristol | Bristol Haematology & Oncology Centre | Beth Thorne                 |            |
| Bristol | Bristol Haematology & Oncology Centre | Amy Holloway                | Pharmacist |
| Bristol | Bristol Haematology & Oncology Centre | Bryony Parrish              |            |
| Bristol | Bristol Haematology & Oncology Centre | Helen Saldanha              |            |
| Bristol | Bristol Haematology & Oncology Centre | Hayley Jones                |            |
| Bristol | Bristol Haematology & Oncology Centre | Jayne Leonard               |            |
| Bristol | Bristol Haematology & Oncology Centre | Kimberly Rockley            |            |
| Bristol | Bristol Haematology & Oncology Centre | Lindsay Ball                | Pharmacist |
| Bristol | Bristol Royal Infirmary               | Lindsay Ball                |            |
| Bristol | Bristol Haematology & Oncology Centre | Polly Gingell               |            |
| Bristol | Bristol Haematology & Oncology Centre | Sally-Ann Hall              | Pharmacist |
| Bristol | Bristol Haematology & Oncology Centre | Sandra Williams (nee Price) | Pharmacist |
| Bristol | Bristol Haematology & Oncology Centre | Sarah Bishop                |            |
| Bristol | Bristol Haematology & Oncology Centre | Seonaid Wright              |            |
| Bristol | Bristol Haematology & Oncology Centre | Sharon Short                |            |
| Burnley | Burnley General Hospital              | Ahmed Salah                 |            |
| Burnley | Burnley General Hospital              | Andrew Brocklehurst         |            |
| Burnley | Burnley General Hospital              | Anthea Cree                 |            |
| Burnley | Burnley General Hospital              | Danya Abdulwahid            |            |
| Burnley | Burnley General Hospital              | Ilyas Ahmed                 |            |
| Burnley | Burnley General Hospital              | Karan Patel                 |            |
| Burnley | Burnley General Hospital              | Omi Parikh                  | PI         |
| Burnley | Burnley General Hospital              | Prasad Kellati              |            |
| Burnley | Burnley General Hospital              | Richard Walshaw             |            |
| Burnley | Burnley General Hospital              | Twesige Mugisa              |            |
| Burnley | Burnley General Hospital              | Deborah Williamson          |            |
| Burnley | Burnley General Hospital              | Imran Haidar                |            |
| Burnley | Burnley General Hospital              | Marcus Wise                 |            |
| Burnley | Burnley General Hospital              | Ruth Conroy                 |            |
| Burnley | Burnley General Hospital              | Tanmay Mukhopadhyay         |            |
| Burnley | Burnley General Hospital              | Win Soe                     |            |

|         |                          |                     |            |
|---------|--------------------------|---------------------|------------|
| Burnley | Burnley General Hospital | Zia Rehman          |            |
| Burnley | Burnley General Hospital | Rizwana Hussain     | Pharmacist |
| Burnley | Burnley General Hospital | Ana Batista         | Pharmacist |
| Burnley | Burnley General Hospital | Fatima Butt         |            |
| Burnley | Burnley General Hospital | Humairaa Timol      |            |
| Burnley | Burnley General Hospital | Bethany Fielding    |            |
| Burnley | Burnley General Hospital | Darren Rusk         |            |
| Burnley | Burnley General Hospital | Matthew Lovell      |            |
| Burnley | Burnley General Hospital | Stephen Kilroy      |            |
| Burnley | Burnley General Hospital | Dayle Squires       |            |
| Burnley | Burnley General Hospital | Hani Hanna          | Pharmacist |
| Burnley | Burnley General Hospital | Farzana Patel       |            |
| Burnley | Burnley General Hospital | Angela Hugill       |            |
| Burnley | Burnley General Hospital | Helen Frankland     |            |
| Burnley | Burnley General Hospital | Janet Ryan-Smith    |            |
| Burnley | Burnley General Hospital | Sue Ashworth        |            |
| Burnley | Burnley General Hospital | Alexandra McCarrick |            |
| Burnley | Burnley General Hospital | Christina Robinson  |            |
| Burnley | Burnley General Hospital | Debbie Sutton       |            |
| Burnley | Burnley General Hospital | Gaynor Bowen        |            |
| Burnley | Burnley General Hospital | Jackie Carey        |            |
| Burnley | Burnley General Hospital | Jan Flaherty        |            |
| Burnley | Burnley General Hospital | Karen Riley         |            |
| Burnley | Royal Blackburn Hospital | Karen Riley         |            |
| Burnley | Burnley General Hospital | Philippa Springle   |            |
| Burnley | Burnley General Hospital | Samatha Guy         |            |
| Burnley | Burnley General Hospital | Sarah Ainsworth     |            |
| Burnley | Burnley General Hospital | Tracey Kilduff      |            |
| Burnley | Burnley General Hospital | Victoria Taylor     | Pharmacist |
| Burnley | Burnley General Hospital | Diane Forrest       |            |
| Burnley | Burnley General Hospital | Helene Chorley      |            |
| Burnley | Burnley General Hospital | Jeanette Hargreaves |            |
| Burnley | Burnley General Hospital | Karen Beard         |            |
| Burnley | Burnley General Hospital | Karen Jewers        |            |

|                   |                          |                            |            |
|-------------------|--------------------------|----------------------------|------------|
| Burnley           | Burnley General Hospital | Louise Dawson              |            |
| Burnley           | Burnley General Hospital | Vivienne Tickle            |            |
| Burton upon Trent | Queen's Hospital Burton  | Prabir Chakraborti         |            |
| Burton upon Trent | Queen's Hospital Burton  | Rosemary Corfield          |            |
| Burton-on-Trent   | Queen's Hospital Burton  | Anita Szita                |            |
| Burton-on-Trent   | Queen's Hospital Burton  | Chandrani Mallik           |            |
| Burton-on-Trent   | Queen's Hospital Burton  | Rohit Malde                |            |
| Burton-on-Trent   | Queen's Hospital Burton  | Seheli Bandyopahdyay       |            |
| Burton-on-Trent   | Queen's Hospital Burton  | Sudipta Datta              |            |
| Burton-on-Trent   | Queen's Hospital Burton  | Chris Curtis               |            |
| Burton-on-Trent   | Queen's Hospital Burton  | Dakshinamoorthy Muthukumar |            |
| Burton-on-Trent   | Queen's Hospital Burton  | Divya Ramadasan            |            |
| Burton-on-Trent   | Queen's Hospital Burton  | Hanine Medani              |            |
| Burton-on-Trent   | Queen's Hospital Burton  | Karzan Hama                |            |
| Burton-on-Trent   | Queen's Hospital Burton  | Mike Smith-Howell          | PI         |
| Burton-on-Trent   | Queen's Hospital Burton  | Rajeev Kaushal             |            |
| Burton-on-Trent   | Queen's Hospital Burton  | Shahzad Ahmed              |            |
| Burton-on-Trent   | Queen's Hospital Burton  | Shan Chetiyawardana        |            |
| Burton-on-Trent   | Queen's Hospital Burton  | V Gajek                    |            |
| Burton-on-Trent   | Queen's Hospital Burton  | Pugazhenthii Pattu         |            |
| Burton-on-Trent   | Queen's Hospital Burton  | Ali Mahmmod                |            |
| Burton-on-Trent   | Queen's Hospital Burton  | Lorraine Carter            |            |
| Burton-on-Trent   | Queen's Hospital Burton  | Annette Fleet              |            |
| Burton-on-Trent   | Queen's Hospital Burton  | Elizabeth Kemp             |            |
| Burton-on-Trent   | Queen's Hospital Burton  | Jennifer Moyes             | Pharmacist |
| Burton-on-Trent   | Queen's Hospital Burton  | Gill Bell                  |            |
| Burton-on-Trent   | Queen's Hospital Burton  | Jo Burns                   |            |
| Burton-on-Trent   | Queen's Hospital Burton  | Katy English (nee Parkes)  |            |
| Burton-on-Trent   | Queen's Hospital Burton  | Sarah Hathaway-Lees        |            |
| Burton-on-Trent   | Queen's Hospital Burton  | Ann Adams                  | Pharmacist |
| Burton-on-Trent   | Queen's Hospital Burton  | Clare Mewies               |            |
| Burton-on-Trent   | Queen's Hospital Burton  | Helen Cox                  |            |
| Burton-on-Trent   | Queen's Hospital Burton  | Helena Cox                 |            |
| Burton-on-Trent   | Queen's Hospital Burton  | Jacqueline Elliott         |            |

|                  |                                                 |                            |            |
|------------------|-------------------------------------------------|----------------------------|------------|
| Bury St Edmunds  | West Suffolk Hospital                           | Alex Martin                | Co-I       |
| Bury St Edmunds  | West Suffolk Hospital                           | Yvonne Rimmer              |            |
| Bury St Edmunds  | West Suffolk Hospital                           | David Matter               |            |
| Bury St Edmunds  | West Suffolk Hospital                           | Fred Tuck                  |            |
| Bury St Edmunds  | West Suffolk Hospital                           | John Raja Ravendar         |            |
| Bury St Edmunds  | West Suffolk Hospital                           | Mark Heath                 |            |
| Bury St Edmunds  | West Suffolk Hospital                           | Amanda Neal                |            |
| Bury St Edmunds  | West Suffolk Hospital                           | Jill Thain                 |            |
| Bury St Edmunds  | West Suffolk Hospital                           | Lisa Patterson             |            |
| Bury St Edmunds  | West Suffolk Hospital                           | Rachel Stocking            |            |
| Bury St Edmunds  | West Suffolk Hospital                           | Susan Hale                 |            |
| Bury St Edmunds  | West Suffolk Hospital                           | Yvonne Field               |            |
| Bury St Edmunds  | West Suffolk Hospital                           | Deborah Clements-Dimmock   |            |
| Bury St Edmunds  | West Suffolk Hospital                           | Frances Flynn              |            |
| Bury St Edmunds  | West Suffolk Hospital                           | Joanne Kellett             |            |
| Bury St Edmunds  | West Suffolk Hospital                           | Elizabeth Devoy            |            |
| Bury St Edmunds  | West Suffolk Hospital                           | Gill Brett                 |            |
| Bury St Edmunds  | West Suffolk Hospital                           | Helen Small                |            |
| Bury St Edmunds  | West Suffolk Hospital                           | Tracey Murray              |            |
| Bury St. Edmonds | West Suffolk Hospital                           | Cathryn Woodward           | PI         |
| Bury St. Edmonds | West Suffolk Hospital                           | James Curtis               | Pharmacist |
| Bury St. Edmonds | West Suffolk Hospital                           | Cherri Blades              |            |
| Camarthen        | Glangwili General (formerly West Wales General) | Mau-Don Phan               | PI         |
| Camarthen        | Glangwili General (formerly West Wales General) | Sonya Goriah               | Co-I       |
| Camarthen        | Glangwili General (formerly West Wales General) | Sandra Griffiths nee Evens |            |
| Camarthen        | Glangwili General (formerly West Wales General) | Bryan Phillips             |            |
| Camarthen        | Glangwili General (formerly West Wales General) | Bleddyn Edwards            |            |
| Camarthen        | Glangwili General (formerly West Wales General) | Meena Raj                  |            |
| Camarthen        | Glangwili General (formerly West Wales General) | Ann Hewins                 |            |
| Camarthen        | Glangwili General (formerly West Wales General) | Samantha Coetzee           |            |
| Camarthen        | Glangwili General (formerly West Wales General) | Rocio Riba                 | Pharmacist |
| Camarthen        | Glangwili General (formerly West Wales General) | Zohra Omar                 |            |
| Cambridge        | Addenbrooke's Hospital                          | Gin Lee                    |            |
| Cambridge        | Addenbrooke's Hospital                          | Andrew Styling             |            |

|           |                                           |                            |            |
|-----------|-------------------------------------------|----------------------------|------------|
| Cambridge | Addenbrooke's Hospital                    | Hossameldin Attia          | Co-I       |
| Cambridge | Addenbrooke's Hospital                    | James Jones                |            |
| Cambridge | Addenbrooke's Hospital                    | James Tanner               |            |
| Cambridge | Addenbrooke's Hospital                    | Kamarul Zaki               |            |
| Cambridge | Addenbrooke's Hospital                    | Mirela Hategan             |            |
| Cambridge | Addenbrooke's Hospital                    | Nicola Thompson            |            |
| Cambridge | Addenbrooke's Hospital                    | Sian Pugh                  |            |
| Cambridge | Addenbrooke's Hospital                    | Simon Pacey                |            |
| Cambridge | Addenbrooke's Hospital                    | Danish Mazhar              | PI         |
| Cambridge | Addenbrooke's Hospital                    | Han Wong                   |            |
| Cambridge | Addenbrooke's Hospital                    | Luke Hughes-Davies         |            |
| Cambridge | Addenbrooke's Hospital                    | Richard Benson             |            |
| Cambridge | Addenbrooke's Hospital                    | Kate Beesley               |            |
| Cambridge | Addenbrooke's Hospital                    | Safaa Therese              |            |
| Cambridge | Addenbrooke's Hospital                    | James Watson               |            |
| Cambridge | Addenbrooke's Hospital                    | Matthew Stone              |            |
| Cambridge | Addenbrooke's Hospital                    | Isaac Opara                |            |
| Cambridge | Addenbrooke's Hospital                    | Amy Strong n.Chandradass   |            |
| Cambridge | Addenbrooke's Hospital                    | Jane Bushen                |            |
| Cambridge | Addenbrooke's Hospital                    | Sandra Cunningham          |            |
| Cambridge | Addenbrooke's Hospital                    | Svitlana Iyevkova          |            |
| Cambridge | Addenbrooke's Hospital                    | Tatiana Hernandez          | Co-I       |
| Cambridge | Addenbrooke's Hospital                    | Anita Chhabra              | Pharmacist |
| Cambridge | Addenbrooke's Hospital                    | Abigail Frost              |            |
| Cambridge | Addenbrooke's Hospital                    | Carole Hewitt              |            |
| Cambridge | Addenbrooke's Hospital                    | Ellie Couch                |            |
| Cambridge | Addenbrooke's Hospital                    | Gemma Cullen (née Godsall) |            |
| Cambridge | Addenbrooke's Hospital                    | Rachel Lister              |            |
| Cambridge | Addenbrooke's Hospital                    | Rebecca Bradley            |            |
| Cambridge | Addenbrooke's Hospital                    | Amanda Walker              |            |
| Cambridge | Addenbrooke's Hospital                    | Debra Mansergh             | Pharmacist |
| Cambridge | Addenbrooke's Hospital                    | Glynn Rolland              |            |
| Cambridge | Addenbrooke's Hospital                    | Vanessa Moreira            |            |
| Cantebry  | Queen Elizabeth The Queen Mother Hospital | Jessica Little             | Co-I       |

|            |                                           |                      |      |
|------------|-------------------------------------------|----------------------|------|
| Cantebury  | Queen Elizabeth The Queen Mother Hospital | Jennifer Turner      | Co-I |
| Cantebury  | William Harvey Hospital                   | Jennifer Turner      | Co-I |
| Cantebury  | William Harvey Hospital                   | Jessica Little       | Co-I |
| Canterbury | Kent and Canterbury Hospital              | Albert Edwards       | Co-I |
| Canterbury | Kent and Canterbury Hospital              | Charlotte Mott       |      |
| Canterbury | Kent and Canterbury Hospital              | Fiora Elwes          | Co-I |
| Canterbury | Kent and Canterbury Hospital              | Ifigenia Vasiliadou  |      |
| Canterbury | Kent and Canterbury Hospital              | Ilyas Ahmed          |      |
| Canterbury | Kent and Canterbury Hospital              | Ioannis Trigonis     | Co-I |
| Canterbury | Kent and Canterbury Hospital              | Jennifer Turner      | Co-I |
| Canterbury | Kent and Canterbury Hospital              | Jessica Gough        | Co-I |
| Canterbury | Kent and Canterbury Hospital              | Lavarniya Rajakumar  |      |
| Canterbury | Kent and Canterbury Hospital              | Mathini Sridharan    |      |
| Canterbury | Kent and Canterbury Hospital              | Patryk Brulinski     | Co-I |
| Canterbury | Kent and Canterbury Hospital              | Rakesh Raman         | Co-I |
| Canterbury | Kent and Canterbury Hospital              | Rohit Malde          |      |
| Canterbury | Kent and Canterbury Hospital              | Sarah Beasley        |      |
| Canterbury | Kent and Canterbury Hospital              | Stephane Tankoua     |      |
| Canterbury | Kent and Canterbury Hospital              | Alice Rendall        | Co-I |
| Canterbury | Kent and Canterbury Hospital              | Arafat Mizra         |      |
| Canterbury | Kent and Canterbury Hospital              | Carys Thomas         | PI   |
| Canterbury | Kent and Canterbury Hospital              | Christos Mikropoulos |      |
| Canterbury | Kent and Canterbury Hospital              | Clary Evans          |      |
| Canterbury | Kent and Canterbury Hospital              | Gemma Hegarty        |      |
| Canterbury | Kent and Canterbury Hospital              | Jessica Little       | Co-I |
| Canterbury | Kent and Canterbury Hospital              | Joao Galante         | Co-I |
| Canterbury | Kent and Canterbury Hospital              | Kannon Nathan        |      |
| Canterbury | Kent and Canterbury Hospital              | Kathryn Lees         |      |
| Canterbury | Kent and Canterbury Hospital              | Mathilda Cominos     |      |
| Canterbury | Kent and Canterbury Hospital              | Matthew Fenton       |      |
| Canterbury | Kent and Canterbury Hospital              | Mohammed Osman       | Co-I |
| Canterbury | Kent and Canterbury Hospital              | Natasha Mithal       | Co-I |
| Canterbury | Kent and Canterbury Hospital              | Sharon Beesley       |      |
| Canterbury | Kent and Canterbury Hospital              | Sugeeta Sukumar      |      |

|            |                              |                     |            |
|------------|------------------------------|---------------------|------------|
| Canterbury | Kent and Canterbury Hospital | Udaiveer Panwar     |            |
| Canterbury | Kent and Canterbury Hospital | Van Sim             | Co-I       |
| Canterbury | Kent and Canterbury Hospital | Coral Greenstreet   |            |
| Canterbury | Kent and Canterbury Hospital | Hayley Blackgrove   |            |
| Canterbury | Kent and Canterbury Hospital | Katy Taylor         |            |
| Canterbury | Kent and Canterbury Hospital | Victoria Williamson |            |
| Canterbury | Kent and Canterbury Hospital | Natalie Catt        |            |
| Canterbury | Kent and Canterbury Hospital | Arafat Mirza        |            |
| Canterbury | Kent and Canterbury Hospital | Sam Gibson          |            |
| Canterbury | Kent and Canterbury Hospital | Steve Dann          |            |
| Canterbury | Kent and Canterbury Hospital | Andrew Gillian      | Pharmacist |
| Canterbury | Kent and Canterbury Hospital | Miguel Capo-Mir     | Pharmacist |
| Canterbury | Kent and Canterbury Hospital | Cindy Slater        |            |
| Canterbury | Kent and Canterbury Hospital | Diane Long          |            |
| Canterbury | Kent and Canterbury Hospital | Hasmath Marjolin    |            |
| Canterbury | Kent and Canterbury Hospital | Laura Mould         |            |
| Canterbury | Kent and Canterbury Hospital | Nikki Crisp         |            |
| Canterbury | Kent and Canterbury Hospital | Rachel Larkins      |            |
| Canterbury | Kent and Canterbury Hospital | Sandra Holness      |            |
| Canterbury | Kent and Canterbury Hospital | Sarah Lines         |            |
| Canterbury | Kent and Canterbury Hospital | Susan Rogers        |            |
| Canterbury | Kent and Canterbury Hospital | Claire White        |            |
| Canterbury | Kent and Canterbury Hospital | Julie Buckley       |            |
| Canterbury | Kent and Canterbury Hospital | Laura Kehoe         |            |
| Canterbury | Kent and Canterbury Hospital | Lesley Rose         |            |
| Canterbury | Kent and Canterbury Hospital | Louise Gladwell     |            |
| Canterbury | Kent and Canterbury Hospital | Sarah Lightfoot     | Pharmacist |
| Canterbury | Kent and Canterbury Hospital | Tracy Boakes        |            |
| Canterbury | Kent and Canterbury Hospital | Alba Tubau          |            |
| Canterbury | Kent and Canterbury Hospital | Bonny Appleby       |            |
| Canterbury | Kent and Canterbury Hospital | Caroline Sunderland |            |
| Canterbury | Kent and Canterbury Hospital | Carolyn Hargreaves  |            |
| Canterbury | Kent and Canterbury Hospital | Linda Wray          |            |
| Canterbury | Kent and Canterbury Hospital | Louise Allen        |            |



|            |                              |                            |      |
|------------|------------------------------|----------------------------|------|
| Canterbury | Kent and Canterbury Hospital | Marian Wood                |      |
| Canterbury | Kent and Canterbury Hospital | Adedolapo Sanni            |      |
| Canterbury | Kent and Canterbury Hospital | Claire Pelham              |      |
| Canterbury | Kent and Canterbury Hospital | Elizabeth Williamson       |      |
| Canterbury | Kent and Canterbury Hospital | Hilary Zurakovsky          |      |
| Canterbury | Kent and Canterbury Hospital | Jill Baker                 |      |
| Canterbury | Kent and Canterbury Hospital | Joanne Williams            |      |
| Canterbury | Kent and Canterbury Hospital | Julie-Ann Davies           |      |
| Canterbury | Kent and Canterbury Hospital | Karen Robinson             |      |
| Canterbury | Kent and Canterbury Hospital | Kathleen (Kathy) Walsh     |      |
| Canterbury | Kent and Canterbury Hospital | Kim Mears                  |      |
| Canterbury | Kent and Canterbury Hospital | Kim Travis                 |      |
| Canterbury | Kent and Canterbury Hospital | Margaret Lipsham           |      |
| Canterbury | Kent and Canterbury Hospital | Paula Whichelo             |      |
| Canterbury | Kent and Canterbury Hospital | Sharon Middleton           |      |
| Canterbury | Kent and Canterbury Hospital | Sue Kelly                  |      |
| Canterbury | Kent and Canterbury Hospital | Susan Drakeley             |      |
| Canterbury | Kent and Canterbury Hospital | Sydney Loveland            |      |
| Canterbury | Kent and Canterbury Hospital | Molua Young                |      |
| Canterbury | Kent and Canterbury Hospital | Denise Crawford            |      |
| Cardiff    | Velindre Hospital            | Aida Hanim Kamarudin       | Co-I |
| Cardiff    | Velindre Hospital            | Alok Chand                 |      |
| Cardiff    | Velindre Hospital            | Andrew Kidd                | Co-I |
| Cardiff    | Velindre Hospital            | Clair Brunner              |      |
| Cardiff    | Velindre Hospital            | Lisa Victoria Jane Clayton |      |
| Cardiff    | Velindre Hospital            | Michael Button             | Co-I |
| Cardiff    | Velindre Hospital            | Nida Hassan                |      |
| Cardiff    | Velindre Hospital            | Satish Kumar               | Co-I |
| Cardiff    | Velindre Hospital            | Srijith Sashidharan        |      |
| Cardiff    | Velindre Hospital            | Diana Mort                 |      |
| Cardiff    | Velindre Hospital            | Jacob Tanguay              | PI   |
| Cardiff    | Velindre Hospital            | Jason Lester               |      |
| Cardiff    | Velindre Hospital            | Jim Barber                 | Co-I |
| Cardiff    | Velindre Hospital            | John Staffurth             | Co-I |

|         |                              |                             |            |
|---------|------------------------------|-----------------------------|------------|
| Cardiff | Velindre Hospital            | Louise Harris               |            |
| Cardiff | Velindre Hospital            | Nachiappan Palaniappan      | Co-I       |
| Cardiff | University Hospital of Wales | Elizabeth Bois (nee Harris) |            |
| Cardiff | Velindre Hospital            | Emily Rumney                |            |
| Cardiff | Velindre Hospital            | Emma Cook                   |            |
| Cardiff | Velindre Hospital            | Naomi Woods                 |            |
| Cardiff | Velindre Hospital            | Rebecca Mitchell            |            |
| Cardiff | Velindre Hospital            | Sandra Greenslade           |            |
| Cardiff | Velindre Hospital            | Christian Smith             |            |
| Cardiff | Velindre Hospital            | Gareth Hunt                 | Pharmacist |
| Cardiff | Velindre Hospital            | James Morgan                |            |
| Cardiff | University Hospital of Wales | Krishna Narahari            | PI         |
| Cardiff | Velindre Hospital            | Phillip Morgan              |            |
| Cardiff | Velindre Hospital            | Rashmi Jadon                |            |
| Cardiff | Velindre Hospital            | Robert Henley               |            |
| Cardiff | Velindre Hospital            | Ross McLeish                |            |
| Cardiff | Velindre Hospital            | Toby Hiscott                |            |
| Cardiff | University Hospital of Wales | Kevin Pearse                |            |
| Cardiff | Velindre Hospital            | Michael Brown               | Pharmacist |
| Cardiff | University Hospital of Wales | Richard Coulthard           |            |
| Cardiff | Velindre Hospital            | Amanda Jcekia               |            |
| Cardiff | Velindre Hospital            | Gillian Willetts            |            |
| Cardiff | University Hospital of Wales | Helen Clark                 |            |
| Cardiff | Velindre Hospital            | Helen Clark                 |            |
| Cardiff | Velindre Hospital            | Jayne Richards              |            |
| Cardiff | Velindre Hospital            | Lynda Holman                |            |
| Cardiff | University Hospital of Wales | Samantha Holliday           |            |
| Cardiff | Velindre Hospital            | Tracy Rees                  |            |
| Cardiff | Velindre Hospital            | Caroline Vitolo             |            |
| Cardiff | University Hospital of Wales | Clare Geere (nee Jones)     |            |
| Cardiff | Velindre Hospital            | Hana Thomas                 |            |
| Cardiff | Velindre Hospital            | Kay Wilson                  |            |
| Cardiff | University Hospital of Wales | Lynne Harry                 |            |
| Cardiff | Velindre Hospital            | Alison Johnson              |            |

|          |                              |                             |             |
|----------|------------------------------|-----------------------------|-------------|
| Cardiff  | Velindre Hospital            | Catherine Sullivan          |             |
| Cardiff  | Velindre Hospital            | Clare Donnithorne           | Pharmacist  |
| Cardiff  | University Hospital of Wales | Colette Clements            |             |
| Cardiff  | Velindre Hospital            | Colette Kemp                |             |
| Cardiff  | Velindre Hospital            | Debbie O'Connor             |             |
| Cardiff  | Velindre Hospital            | Gladys Makuta               |             |
| Cardiff  | Velindre Hospital            | Jessica Dermott (nee Platt) |             |
| Cardiff  | Velindre Hospital            | Joanne Preece               |             |
| Cardiff  | Velindre Hospital            | Lisa Stafford               |             |
| Cardiff  | Velindre Hospital            | Loretta Sweeney             |             |
| Cardiff  | Velindre Hospital            | Louise Morgan               |             |
| Cardiff  | Velindre Hospital            | Lucy Chestney               |             |
| Cardiff  | Velindre Hospital            | Necia Jones                 |             |
| Cardiff  | Velindre Hospital            | Renata Poole                | Pharmacist  |
| Cardiff  | Velindre Hospital            | Sarah Fry                   |             |
| Cardiff  | Velindre Hospital            | Sonya Osborne               |             |
| Cardiff  | Velindre Hospital            | Amanda Jackson              |             |
| Cardiff  | Velindre Hospital            | Bethan Tranter              |             |
| Cardiff  | Velindre Hospital            | Catherine John              |             |
| Cardiff  | Velindre Hospital            | Cathy Richards              | Pharmacist  |
| Cardiff  | Velindre Hospital            | Charlotte Young             |             |
| Cardiff  | Velindre Hospital            | Clare Boobier               |             |
| Cardiff  | Velindre Hospital            | Donna Lear                  |             |
| Cardiff  | Velindre Hospital            | Karen Pow                   | Pharmacist  |
| Cardiff  | Velindre Hospital            | Kathy Bishop                |             |
| Cardiff  | Velindre Hospital            | Leanne Quinn                |             |
| Cardiff  | Velindre Hospital            | Lucy Wilbraham              |             |
| Cardiff  | Velindre Hospital            | Vicki Reynolds              |             |
| Cardiff  | University Hospital of Wales | Howard Kynaston             |             |
| Cardiff  | Velindre Hospital            | Malcolm Mason               | Co-I        |
| Cardiff  | Velindre Hospital            | Lynette Lane                |             |
| Carlisle | Cumberland Infirmary         | Fiona Douglas               |             |
| Carlisle | Cumberland Infirmary         | Anil Kumar                  | PI          |
| Carlisle | Cumberland Infirmary         | Fergus Young                | Pathologist |

|            |                      |                           |            |
|------------|----------------------|---------------------------|------------|
| Carlisle   | Cumberland Infirmary | Jonathan Nicoll           |            |
| Carlisle   | Cumberland Infirmary | Muhammad Rahman           |            |
| Carlisle   | Cumberland Infirmary | Norma Sidek               |            |
| Carlisle   | Cumberland Infirmary | Jenna Wildey              |            |
| Carlisle   | Cumberland Infirmary | Christopher Brewer        | Pharmacist |
| Carlisle   | Cumberland Infirmary | Ivor Hughes               | Pharmacist |
| Carlisle   | Cumberland Infirmary | Beverley Wilkinson        |            |
| Carlisle   | Cumberland Infirmary | Patricia Nicholls         |            |
| Carlisle   | Cumberland Infirmary | Charlotte Eyles           |            |
| Carlisle   | Cumberland Infirmary | Grace Fryer               |            |
| Carlisle   | Cumberland Infirmary | Angela Birt               |            |
| Carlisle   | Cumberland Infirmary | Diane Donnelly            | Pharmacist |
| Chelmsford | Broomfield Hospital  | Isabella Maund            |            |
| Chelmsford | Broomfield Hospital  | Abdel Hamid               | PI         |
| Chelmsford | Broomfield Hospital  | Gopalakrishnan Srinivasan | Co-I       |
| Chelmsford | Broomfield Hospital  | Kiran Kancherla           |            |
| Chelmsford | Broomfield Hospital  | Priscilla Leone           |            |
| Chelmsford | Broomfield Hospital  | Udaiveer Panwar           |            |
| Chelmsford | Broomfield Hospital  | You Yone                  |            |
| Chelmsford | Broomfield Hospital  | Jennifer Child            |            |
| Chelmsford | Broomfield Hospital  | Emma Mitchell             |            |
| Chelmsford | Broomfield Hospital  | Amon Wijunamai            |            |
| Chelmsford | Broomfield Hospital  | Dane Goodere-Bennett      |            |
| Chelmsford | Broomfield Hospital  | Bryan Singizi             |            |
| Chelmsford | Broomfield Hospital  | Christian Barnett         |            |
| Chelmsford | Broomfield Hospital  | Melanie Boxall            |            |
| Chelmsford | Broomfield Hospital  | Melanie Ruben             |            |
| Chelmsford | Broomfield Hospital  | Victoria Apps             |            |
| Chelmsford | Broomfield Hospital  | Donna Briggs              | Pharmacist |
| Chelmsford | Broomfield Hospital  | Emma Cannon               | Pharmacist |
| Chelmsford | Broomfield Hospital  | Jane Giles                | Pharmacist |
| Chelmsford | Broomfield Hospital  | Elizabeth Dawson          |            |
| Chelmsford | Broomfield Hospital  | Emma Cannon               |            |
| Chelmsford | Broomfield Hospital  | Lucy Willsher             |            |

|            |                             |                     |            |
|------------|-----------------------------|---------------------|------------|
| Chelmsford | Broomfield Hospital         | Nicola Cutmore      |            |
| Chelmsford | Broomfield Hospital         | Victoria Scott      |            |
| Chelmsford | Broomfield Hospital         | Edel Spruce         |            |
| Chelmsford | Broomfield Hospital         | Frances Cairns      | Pharmacist |
| Chelmsford | Broomfield Hospital         | Lucy Cooper         | Pharmacist |
| Chelmsford | Broomfield Hospital         | Sarah Ferguson      |            |
| Chelmsford | Broomfield Hospital         | Sian Gibson         |            |
| Chelmsford | Broomfield Hospital         | Yvonne Lester       |            |
| Chelmsford | Broomfield Hospital         | Tracey Camburn      |            |
| Chelmsford | Broomfield Hospital         | Enca Parsons        |            |
| Cheltenham | Cheltenham General Hospital | Caitlin Bowden      |            |
| Cheltenham | Cheltenham General Hospital | Laura Malins        |            |
| Cheltenham | Cheltenham General Hospital | Sai Jonnada         |            |
| Cheltenham | Cheltenham General Hospital | Victoria Bell       |            |
| Cheltenham | Cheltenham General Hospital | Vishal Bhalla       |            |
| Cheltenham | Cheltenham General Hospital | Alex Williams       |            |
| Cheltenham | Cheltenham General Hospital | Audrey Cook         |            |
| Cheltenham | Cheltenham General Hospital | Duncan Stow         |            |
| Cheltenham | Cheltenham General Hospital | Jo Bowen            | PI         |
| Cheltenham | Cheltenham General Hospital | Jyothsna Chennupati |            |
| Cheltenham | Cheltenham General Hospital | Peter Jenkins       | Co-I       |
| Cheltenham | Cheltenham General Hospital | Roger Owen          |            |
| Cheltenham | Cheltenham General Hospital | Amy Skelton         |            |
| Cheltenham | Cheltenham General Hospital | Bethan Cartwright   |            |
| Cheltenham | Cheltenham General Hospital | Louise Kidner       |            |
| Cheltenham | Cheltenham General Hospital | Lucy Blake          |            |
| Cheltenham | Cheltenham General Hospital | Madelaine Smith     |            |
| Cheltenham | Cheltenham General Hospital | Sarah Stanley       |            |
| Cheltenham | Cheltenham General Hospital | Rachel Carter       |            |
| Cheltenham | Cheltenham General Hospital | Sarah Beazer        |            |
| Cheltenham | Cheltenham General Hospital | Matthew Tan         |            |
| Cheltenham | Cheltenham General Hospital | Samuel Croly        |            |
| Cheltenham | Cheltenham General Hospital | Ian Ingledew        |            |
| Cheltenham | Cheltenham General Hospital | Richard Wallis      | Pharmacist |

|            |                              |                          |            |
|------------|------------------------------|--------------------------|------------|
| Cheltenham | Cheltenham General Hospital  | Helen Babbage            |            |
| Cheltenham | Cheltenham General Hospital  | Jennifer Dewett          |            |
| Cheltenham | Cheltenham General Hospital  | Jennifer Smith           |            |
| Cheltenham | Cheltenham General Hospital  | Jill Chittock            |            |
| Cheltenham | Cheltenham General Hospital  | Julia Hall               |            |
| Cheltenham | Cheltenham General Hospital  | Julie Allen              |            |
| Cheltenham | Cheltenham General Hospital  | Lin Crossley             |            |
| Cheltenham | Cheltenham General Hospital  | Nicola Robinson          |            |
| Cheltenham | Cheltenham General Hospital  | Rachel Durrant           | Pharmacist |
| Cheltenham | Cheltenham General Hospital  | Rachel Sayers            |            |
| Cheltenham | Cheltenham General Hospital  | Chris Ford               |            |
| Cheltenham | Cheltenham General Hospital  | Kate Trigg-Hogarth       |            |
| Cheltenham | Cheltenham General Hospital  | Sue Wronski              |            |
| Cheltenham | Cheltenham General Hospital  | Susan Anderson           |            |
| Cheltenham | Cheltenham General Hospital  | Abi Stuart               |            |
| Cheltenham | Cheltenham General Hospital  | Charlotte Ayrton         |            |
| Cheltenham | Cheltenham General Hospital  | Elaine Sizer             |            |
| Cheltenham | Cheltenham General Hospital  | Elisabeth Read           | Pharmacist |
| Cheltenham | Cheltenham General Hospital  | Rebecca Mesher           |            |
| Cheltenham | Cheltenham General Hospital  | Catherine Stuart-Grumbar |            |
| Cheltenham | Cheltenham General Hospital  | Janet Forkes             |            |
| Cheltenham | Cheltenham General Hospital  | Jennifer Healey-Mariano  |            |
| Cheltenham | Cheltenham General Hospital  | Rehana Bakawala          |            |
| Chester    | Countess of Chester Hospital | Azman Ibrahim            | PI         |
| Chester    | Countess of Chester Hospital | Elizabeth Gallimore      |            |
| Chester    | Countess of Chester Hospital | Emma Barry               |            |
| Chester    | Countess of Chester Hospital | Grace McGrath            |            |
| Chester    | Countess of Chester Hospital | Jenny Miller             |            |
| Chester    | Countess of Chester Hospital | Lucy Beresford           |            |
| Chester    | Countess of Chester Hospital | Shannon Spicer           |            |
| Chester    | Countess of Chester Hospital | Joshua Williams          |            |
| Chester    | Countess of Chester Hospital | Judith Prince            |            |
| Chester    | Countess of Chester Hospital | Wesley Artist            | Pharmacist |
| Chester    | Countess of Chester Hospital | Chelcie Faulkner         |            |

|            |                              |                            |            |
|------------|------------------------------|----------------------------|------------|
| Chester    | Countess of Chester Hospital | Helen Jeffrey              |            |
| Chester    | Countess of Chester Hospital | Jenny Grounds              |            |
| Chester    | Countess of Chester Hospital | Kathryn Cawley             |            |
| Chester    | Countess of Chester Hospital | Rebecca Grogan             |            |
| Chester    | Countess of Chester Hospital | Rebecca Hopcroft           |            |
| Chester    | Countess of Chester Hospital | Sarah Illingworth          |            |
| Chester    | Countess of Chester Hospital | Sue Green                  |            |
| Chester    | Countess of Chester Hospital | Helen Eccleson             |            |
| Chester    | Countess of Chester Hospital | Denise Archer              |            |
| Chester    | Countess of Chester Hospital | Janet Spriggs              |            |
| Chester    | Countess of Chester Hospital | Lisa Dobson (nee Child)    | Pharmacist |
| Chester    | Countess of Chester Hospital | Mary Aldous                |            |
| Chur       | Kantonsspital Graubünden     | Dirk Kienle                |            |
| Chur       | Kantonsspital Graubünden     | M Mark                     |            |
| Chur       | Kantonsspital Graubünden     | Michael Schwitter          |            |
| Chur       | Kantonsspital Graubünden     | Raeto Strebel              | PI         |
| Chur       | Kantonsspital Graubünden     | Richard Cathomas           |            |
| Chur       | Kantonsspital Graubünden     | Roger von Moos             |            |
| Chur       | Kantonsspital Graubünden     | Carin Aebli                |            |
| Chur       | Kantonsspital Graubünden     | Eloise Kremer              |            |
| Chur       | Kantonsspital Graubünden     | Gabriela Manetsch          |            |
| Chur       | Kantonsspital Graubünden     | Radmila Moudry             | Pharmacist |
| Colchester | Colchester General Hospital  | Anita Szita                | Co-I       |
| Colchester | Colchester General Hospital  | Muthar Kumar               |            |
| Colchester | Essex County Hospital        | Muthar Kumar               |            |
| Colchester | Colchester General Hospital  | Sunil Skaria               |            |
| Colchester | Colchester General Hospital  | Bruce Sizer                | Co-I       |
| Colchester | Essex County Hospital        | Bruce Sizer                |            |
| Colchester | Colchester General Hospital  | Dakshinamoorthy Muthukumar | PI         |
| Colchester | Colchester General Hospital  | Devy Basu                  | Co-I       |
| Colchester | Essex County Hospital        | Devy Basu                  |            |
| Colchester | Colchester General Hospital  | Rana Mahmood               | Co-I       |
| Colchester | Colchester General Hospital  | Nicola Taylor              |            |
| Colchester | Essex County Hospital        | Pugazhenthii Pattu         |            |

|            |                             |                     |            |
|------------|-----------------------------|---------------------|------------|
| Colchester | Colchester General Hospital | Richard Gant        | Pharmacist |
| Colchester | Colchester General Hospital | Louies Mabelin      |            |
| Colchester | Colchester General Hospital | Liz Hunting         |            |
| Colchester | Essex County Hospital       | Liz Hunting         |            |
| Colchester | Colchester General Hospital | Lucy Thorogood      |            |
| Colchester | Essex County Hospital       | Lucy Thorogood      |            |
| Colchester | Colchester General Hospital | Katrina Cooke       |            |
| Colchester | Colchester General Hospital | Michelle Fisher     |            |
| Colchester | Colchester General Hospital | Nicola Cutmore      |            |
| Colchester | Colchester General Hospital | Celine Driscoll     |            |
| Colchester | Essex County Hospital       | Celine Driscoll     |            |
| Colchester | Colchester General Hospital | Daisuke Takeuchi    |            |
| Colchester | Colchester General Hospital | Hayley Hewer        |            |
| Colchester | Essex County Hospital       | Hayley Hewer        |            |
| Colchester | Colchester General Hospital | Jane Ketley-O'Donel | Pharmacist |
| Colchester | Essex County Hospital       | Jane Ketley-O'Donel |            |
| Colchester | Essex County Hospital       | Lorna Dewar         |            |
| Colchester | Colchester General Hospital | Michelle Marshall   |            |
| Colchester | Essex County Hospital       | Michelle Marshall   |            |
| Cookridge  | Cookridge Hospital          | Carmel Loughrey     |            |
| Cosham     | Queen Alexandra Hospital    | Robert Keating      |            |
| Cottingham | Castle Hill Hospital        | Dulani Ranatunge    |            |
| Cottingham | Castle Hill Hospital        | George Bozat        |            |
| Cottingham | Castle Hill Hospital        | Iqtedar Muazzam     |            |
| Cottingham | Castle Hill Hospital        | Jenny Marsden       |            |
| Cottingham | Castle Hill Hospital        | Khawaje Zahid       |            |
| Cottingham | Castle Hill Hospital        | Louise Karsera      |            |
| Cottingham | Castle Hill Hospital        | Mohan Hingorani     | Co-I       |
| Cottingham | Castle Hill Hospital        | Faheem Bashir       | Co-I       |
| Cottingham | Castle Hill Hospital        | Mateen Akhtar       |            |
| Cottingham | Castle Hill Hospital        | Mohammad Butt       | Co-I       |
| Cottingham | Castle Hill Hospital        | Bob Bush            | Pharmacist |
| Cottingham | Castle Hill Hospital        | A Yousuff           |            |
| Cottingham | Castle Hill Hospital        | Adam Wolstencroft   | Pharmacist |



|            |                                               |                           |            |
|------------|-----------------------------------------------|---------------------------|------------|
| Cottingham | Castle Hill Hospital                          | Ian Beckley               |            |
| Cottingham | Castle Hill Hospital                          | John Hetherington         |            |
| Cottingham | Castle Hill Hospital                          | Jonathan Gill             |            |
| Cottingham | Castle Hill Hospital                          | Kristian Plowman          |            |
| Cottingham | Castle Hill Hospital                          | Matthew Simms             | PI         |
| Cottingham | Castle Hill Hospital                          | Karen Stubbs              |            |
| Cottingham | Castle Hill Hospital                          | Linzi Bone                |            |
| Cottingham | Castle Hill Hospital                          | Paula O'Reilly            |            |
| Cottingham | Castle Hill Hospital                          | Julie Rawlings            |            |
| Cottingham | Castle Hill Hospital                          | Lucy Richardson           |            |
| Cottingham | Castle Hill Hospital                          | Mary Garthwaite           |            |
| Cottingham | Castle Hill Hospital                          | Sarah Moffat              |            |
| Cottingham | Castle Hill Hospital                          | Suzy Bunton               |            |
| Cottingham | Castle Hill Hospital                          | Carol Hodson              |            |
| Cottingham | Castle Hill Hospital                          | Linda Hoggarth            |            |
| Cottingham | Castle Hill Hospital                          | Sarah Brown               |            |
| Cottingham | Castle Hill Hospital                          | Sarah Palmer              |            |
| Cottingham | Castle Hill Hospital                          | Vicki Lowthorpe           |            |
| Coventry   | University Hospital Coventry and Warwickshire | Michael Tilby             | PI         |
| Coventry   | University Hospital Coventry and Warwickshire | Shah Rafique              | Co-I       |
| Coventry   | University Hospital Coventry and Warwickshire | Andrew Chan               |            |
| Coventry   | University Hospital Coventry and Warwickshire | Andrew Stockdale          |            |
| Coventry   | University Hospital Coventry and Warwickshire | Jane Worliding            |            |
| Coventry   | University Hospital Coventry and Warwickshire | Joanna Hamilton           | Co-I       |
| Coventry   | University Hospital Coventry and Warwickshire | Senthil Kumar Athmanathan |            |
| Coventry   | University Hospital Coventry and Warwickshire | Yakhub Khan               | PI         |
| Coventry   | University Hospital Coventry and Warwickshire | Fiona McGurk              | Pharmacist |
| Coventry   | University Hospital Coventry and Warwickshire | Lucy Miller               |            |
| Coventry   | University Hospital Coventry and Warwickshire | Mariam Bharuchi           |            |
| Coventry   | University Hospital Coventry and Warwickshire | Rajbinder Deol            |            |
| Coventry   | University Hospital Coventry and Warwickshire | Vicky Sturgess            |            |
| Coventry   | University Hospital Coventry and Warwickshire | Donald Macdonald          |            |
| Coventry   | University Hospital Coventry and Warwickshire | Mohamed Mooradun          |            |
| Coventry   | University Hospital Coventry and Warwickshire | Mohammed Khan             | Pharmacist |

|          |                                               |                       |            |
|----------|-----------------------------------------------|-----------------------|------------|
| Coventry | University Hospital Coventry and Warwickshire | Albert Mislav         |            |
| Coventry | University Hospital Coventry and Warwickshire | Jason Allen           |            |
| Coventry | University Hospital Coventry and Warwickshire | Karandeepu Pachoo     | Pharmacist |
| Coventry | University Hospital Coventry and Warwickshire | Kieran Jefferson      |            |
| Coventry | University Hospital Coventry and Warwickshire | Mark Whitmore         |            |
| Coventry | University Hospital Coventry and Warwickshire | Sukhbinder Salh       | Pharmacist |
| Coventry | Coventry and Warwickshire Hospital            | Kathleen Rose         |            |
| Coventry | University Hospital Coventry and Warwickshire | Kathleen Rose         |            |
| Coventry | University Hospital Coventry and Warwickshire | Laura Stanley         |            |
| Coventry | Coventry and Warwickshire Hospital            | Leila Fortunato       |            |
| Coventry | University Hospital Coventry and Warwickshire | Noor Ayesha Shah      |            |
| Coventry | University Hospital Coventry and Warwickshire | Zoe O'Neill           |            |
| Coventry | University Hospital Coventry and Warwickshire | Elaine Simmons        |            |
| Coventry | University Hospital Coventry and Warwickshire | Rachel Bazeley        |            |
| Coventry | University Hospital Coventry and Warwickshire | Sonia Powell          |            |
| Coventry | University Hospital Coventry and Warwickshire | Theresa Griffiths     |            |
| Coventry | University Hospital Coventry and Warwickshire | Vikki Browne          |            |
| Coventry | University Hospital Coventry and Warwickshire | Charlie-marie Suddens |            |
| Coventry | University Hospital Coventry and Warwickshire | Dannielle Burgess     |            |
| Coventry | University Hospital Coventry and Warwickshire | Fiona Tranter         |            |
| Coventry | University Hospital Coventry and Warwickshire | Jenny Warmington      |            |
| Coventry | University Hospital Coventry and Warwickshire | Luanne Carey          |            |
| Coventry | University Hospital Coventry and Warwickshire | Padama Singh          | Pharmacist |
| Coventry | University Hospital Coventry and Warwickshire | Sarah O'Toole         |            |
| Coventry | University Hospital Coventry and Warwickshire | Stacey Clarke         | Pharmacist |
| Coventry | University Hospital Coventry and Warwickshire | Su Ngwenya            |            |
| Coventry | University Hospital Coventry and Warwickshire | Sue Robinson          |            |
| Coventry | University Hospital Coventry and Warwickshire | Tammi-Lea Beeby       |            |
| Coventry | University Hospital Coventry and Warwickshire | Linda Wimbush         |            |
| Coventry | University Hospital Coventry and Warwickshire | Maggie Brown          |            |
| Coventry | University Hospital Coventry and Warwickshire | Rachel Thompson       | Pharmacist |
| Coventry | University Hospital Coventry and Warwickshire | Rebecca Aaron         | Pharmacist |
| Crewe    | Leighton Hospital                             | William Croxford      |            |
| Crewe    | Leighton Hospital                             | Anna Tran             | PI         |

|       |                   |                     |            |
|-------|-------------------|---------------------|------------|
| Crewe | Leighton Hospital | Catherine Thompson  |            |
| Crewe | Leighton Hospital | David Butterworth   |            |
| Crewe | Leighton Hospital | James Wylie         |            |
| Crewe | Leighton Hospital | Michael Braun       |            |
| Crewe | Leighton Hospital | Adele Hough         |            |
| Crewe | Leighton Hospital | Annabel Tomlinson   |            |
| Crewe | Leighton Hospital | Gemma Nash          |            |
| Crewe | Leighton Hospital | Karen Hillyer       |            |
| Crewe | Leighton Hospital | Katherine Hampton   |            |
| Crewe | Leighton Hospital | Sarah Tinsley       | Pharmacist |
| Crewe | Leighton Hospital | Andrew Ritchings    | Pharmacist |
| Crewe | Leighton Hospital | Osman Chohan        |            |
| Crewe | Leighton Hospital | P Irwin             |            |
| Crewe | Leighton Hospital | P Javle             |            |
| Crewe | Leighton Hospital | Carole Bennion      |            |
| Crewe | Leighton Hospital | Caroline Walker     |            |
| Crewe | Leighton Hospital | Joanne Hughes       |            |
| Crewe | Leighton Hospital | Julie Meir          |            |
| Crewe | Leighton Hospital | Karen Wilson        |            |
| Crewe | Leighton Hospital | Kim Best            |            |
| Crewe | Leighton Hospital | Leanne Overall      |            |
| Crewe | Leighton Hospital | Lydia Buxton        |            |
| Crewe | Leighton Hospital | Nicola Ritchings    |            |
| Crewe | Leighton Hospital | Chris Hough         |            |
| Crewe | Leighton Hospital | Bethan Roberts      |            |
| Crewe | Leighton Hospital | Emma Margerum       |            |
| Crewe | Leighton Hospital | Jane Sellman        |            |
| Crewe | Leighton Hospital | Karen Gilbert       |            |
| Crewe | Leighton Hospital | Rachel Smith        |            |
| Crewe | Leighton Hospital | Taya Jones          | Pharmacist |
| Crewe | Leighton Hospital | Thiraviyam Elumalai |            |
| Crewe | Leighton Hospital | Tracy Larcombe      |            |
| Crewe | Leighton Hospital | Carolyn Mansfield   |            |
| Crewe | Leighton Hospital | Julia Gemmell       |            |

|            |                              |                       |            |
|------------|------------------------------|-----------------------|------------|
| Crewe      | Leighton Hospital            | Sarah Hoswell         |            |
| Crewe      | Leighton Hospital            | Vanessa Adamson       |            |
| Croydon    | Croydon University Hospital  | Yvonne Campbell       |            |
| Croydon    | Croydon University Hospital  | Ann Payne             |            |
| Croydon    | Croydon University Hospital  | Anne Haldeos          |            |
| Croydon    | Croydon University Hospital  | Cheryl Batish         |            |
| Darlington | Darlington Memorial Hospital | Mohammed Kagzi        | PI         |
| Darlington | Darlington Memorial Hospital | Clive Peedell         |            |
| Darlington | Darlington Memorial Hospital | John Hardman          |            |
| Darlington | Darlington Memorial Hospital | Julia McBride         |            |
| Darlington | Darlington Memorial Hospital | Steven Pratt          |            |
| Darlington | Darlington Memorial Hospital | Tanmay Mukhopadhyay   |            |
| Darlington | Darlington Memorial Hospital | Rachel Chatt          |            |
| Darlington | Darlington Memorial Hospital | Jonathan Stoddard     |            |
| Darlington | Darlington Memorial Hospital | Richard Nendick       | Pharmacist |
| Darlington | Darlington Memorial Hospital | Calum Polwart         | Pharmacist |
| Darlington | Darlington Memorial Hospital | Hyder Latif           |            |
| Darlington | Darlington Memorial Hospital | John Vickers          |            |
| Darlington | Darlington Memorial Hospital | Asia Sarwar           |            |
| Darlington | Darlington Memorial Hospital | Helen Haley           |            |
| Darlington | Darlington Memorial Hospital | Kimberly Stamp        |            |
| Darlington | Darlington Memorial Hospital | Lynsey Stephenson     | Pharmacist |
| Darlington | Darlington Memorial Hospital | Alison Chilvers       |            |
| Darlington | Darlington Memorial Hospital | Claire Henderson      |            |
| Darlington | Darlington Memorial Hospital | Susan Wadd            |            |
| Darlington | Darlington Memorial Hospital | Lorna Morgan          |            |
| Darlington | Darlington Memorial Hospital | Fiona Strong          |            |
| Darlington | Darlington Memorial Hospital | Jane Shaw             |            |
| Darlington | Darlington Memorial Hospital | Penny Gamble          |            |
| Dartford   | Darent Valley Hospital       | Louise Lacey          |            |
| Derb       | Queen's Hospital Burton      | Christopher Kent      |            |
| Derby      | Royal Derby Hospital         | Ajith Gopinathan Nair |            |
| Derby      | Royal Derby Hospital         | Alastair McCabe       |            |
| Derby      | Royal Derby Hospital         | Ayman Ramadan         |            |

|       |                                |                            |            |
|-------|--------------------------------|----------------------------|------------|
| Derby | Royal Derby Hospital           | Chin-Hiong Chong           |            |
| Derby | Royal Derby Hospital           | Jun Hao Lim                |            |
| Derby | Royal Derby Hospital           | Kiran Das                  |            |
| Derby | Royal Derby Hospital           | Lauren Jones               |            |
| Derby | Royal Derby Hospital           | Maeve Pomeroy              |            |
| Derby | Royal Derby Hospital           | Peter Mason                |            |
| Derby | Royal Derby Hospital           | Sadia Abdullah             |            |
| Derby | Royal Derby Hospital           | Seheli Bandyopahdyay       |            |
| Derby | Royal Derby Hospital           | Thangarajah Mugunthan      |            |
| Derby | Royal Derby Hospital           | Timothy Podd               |            |
| Derby | Royal Derby Hospital           | Virgil Sivoglo             |            |
| Derby | Royal Derby Hospital           | Christopher Kent           |            |
| Derby | London Road Community Hospital | Dakshinamoorthy Muthukumar |            |
| Derby | Royal Derby Hospital           | Dakshinamoorthy Muthukumar |            |
| Derby | Royal Derby Hospital           | Jessica Davies             |            |
| Derby | Royal Derby Hospital           | Lokesh Puttarachaiah       |            |
| Derby | Royal Derby Hospital           | Louise Brookes             |            |
| Derby | Royal Derby Hospital           | Mike Smith-Howell          |            |
| Derby | London Road Community Hospital | Prabir Chakraborti         |            |
| Derby | Royal Derby Hospital           | Prabir Chakraborti         |            |
| Derby | Royal Derby Hospital           | Prantik Das                | PI         |
| Derby | Royal Derby Hospital           | Rania Mohammed             |            |
| Derby | Royal Derby Hospital           | Sarah Taylor               |            |
| Derby | Royal Derby Hospital           | Sathan Boonyaprapa         |            |
| Derby | Royal Derby Hospital           | Shahzad Ahmed              |            |
| Derby | Royal Derby Hospital           | Caroline Coulson           |            |
| Derby | Royal Derby Hospital           | Georgia Wright             |            |
| Derby | Royal Derby Hospital           | Helen Beveridge            |            |
| Derby | Royal Derby Hospital           | Marie Ann Goldsworthy      | Pharmacist |
| Derby | London Road Community Hospital | Heini Jussila              |            |
| Derby | London Road Community Hospital | Keeley Smith               |            |
| Derby | Royal Derby Hospital           | Chris Worth                |            |
| Derby | Royal Derby Hospital           | James Aldous               |            |
| Derby | Royal Derby Hospital           | Pugazhenthii Pattu         |            |

|       |                                |                          |            |
|-------|--------------------------------|--------------------------|------------|
| Derby | Royal Derby Hospital           | Aaron Gallagher          |            |
| Derby | London Road Community Hospital | Colin Ward               |            |
| Derby | Royal Derby Hospital           | Colin Ward               | Pharmacist |
| Derby | Royal Derby Hospital           | Fanuel Magaya            |            |
| Derby | Royal Derby Hospital           | Alison Carrick           |            |
| Derby | Royal Derby Hospital           | Charlotte Downes         |            |
| Derby | Royal Derby Hospital           | Donna Beal               |            |
| Derby | Royal Derby Hospital           | Elizabeth Nadin          |            |
| Derby | Royal Derby Hospital           | Joely Morgan             |            |
| Derby | Royal Derby Hospital           | Kashmira Subramanian     |            |
| Derby | Royal Derby Hospital           | Margaret Harper          |            |
| Derby | London Road Community Hospital | Wendy Morrisroe          |            |
| Derby | Royal Derby Hospital           | Wendy Morrisroe          |            |
| Derby | Royal Derby Hospital           | Elizabeth Bedford        |            |
| Derby | Royal Derby Hospital           | Ellie Piggott            |            |
| Derby | Royal Derby Hospital           | Josephine Chmiel         |            |
| Derby | Royal Derby Hospital           | Liz Bedford              |            |
| Derby | Royal Derby Hospital           | Lucy McCandless          |            |
| Derby | Royal Derby Hospital           | Manni Sandhu             |            |
| Derby | Royal Derby Hospital           | Nicole McKee             |            |
| Derby | Royal Derby Hospital           | Nicole McKee (nee Isitt) |            |
| Derby | Royal Derby Hospital           | Wendy Abbott             | Pharmacist |
| Derby | Royal Derby Hospital           | Claire Wintle            |            |
| Derby | Royal Derby Hospital           | Emily Mignott            |            |
| Derby | Royal Derby Hospital           | Emma Brooks              |            |
| Derby | Royal Derby Hospital           | Hege Strand              |            |
| Derby | Royal Derby Hospital           | Janet Tomlinson          |            |
| Derby | Royal Derby Hospital           | Jennifer Mitchell        |            |
| Derby | Royal Derby Hospital           | Jodie Fitzgerald         |            |
| Derby | Royal Derby Hospital           | Julie Edmonds            |            |
| Derby | London Road Community Hospital | Sarah Hathaway-Lees      |            |
| Derby | Royal Derby Hospital           | Sarah Longhurst          |            |
| Derby | London Road Community Hospital | Debbie Davis             |            |
| Derby | Royal Derby Hospital           | Gemma Irvine             |            |

|           |                                 |                       |      |
|-----------|---------------------------------|-----------------------|------|
| Derby     | Royal Derby Hospital            | Gemma Redfern         |      |
| Derby     | London Road Community Hospital  | Jane Lawrie           |      |
| Derby     | Royal Derby Hospital            | Julie Dockree         |      |
| Derby     | London Road Community Hospital  | Karen Simmonds        |      |
| Derby     | Royal Derby Hospital            | Karen Simmonds        |      |
| Derby     | London Road Community Hospital  | Kay Bowdler           |      |
| Derby     | London Road Community Hospital  | Kristina Duggleby     |      |
| Derby     | Royal Derby Hospital            | Lorraine McDonald     |      |
| Derby     | Royal Derby Hospital            | Mishelle Fanuncio     |      |
| Derby     | London Road Community Hospital  | Sarah Hare            |      |
| Derby     | Royal Derby Hospital            | Sarah Hare            |      |
| Derby     | Royal Derby Hospital            | Shobha Saravanasuthan |      |
| Derby     | Royal Derby Hospital            | Sonya Bradshaw        |      |
| Derby     | Royal Derby Hospital            | Susan Smith           |      |
| Devon     | Royal Devon and Exeter Hospital | Anna Lydon            |      |
| Doncaster | Doncaster Royal Infirmary       | Jessica Tay           | Co-I |
| Doncaster | Doncaster Royal Infirmary       | Muneeb Qureshi        |      |
| Doncaster | Doncaster Royal Infirmary       | Pooja Iyer            |      |
| Doncaster | Doncaster Royal Infirmary       | Virgil Sivoglo        | PI   |
| Doncaster | Doncaster Royal Infirmary       | Carmel Pezaro         | PI   |
| Doncaster | Doncaster Royal Infirmary       | Catherine Ferguson    |      |
| Doncaster | Doncaster Royal Infirmary       | Georgia Hooton        |      |
| Doncaster | Doncaster Royal Infirmary       | Janet Field           |      |
| Doncaster | Doncaster Royal Infirmary       | Jennifer Taylor       |      |
| Doncaster | Doncaster Royal Infirmary       | Alexandra Firth       |      |
| Doncaster | Doncaster Royal Infirmary       | Robert Chadwick       |      |
| Doncaster | Doncaster Royal Infirmary       | Ben East              |      |
| Doncaster | Doncaster Royal Infirmary       | Amy Neal              |      |
| Doncaster | Doncaster Royal Infirmary       | Deborah Walstow       |      |
| Doncaster | Doncaster Royal Infirmary       | Lisa Warren           |      |
| Doncaster | Doncaster Royal Infirmary       | Meredyth Harris       |      |
| Doncaster | Doncaster Royal Infirmary       | Nicola Wilkinson      |      |
| Doncaster | Doncaster Royal Infirmary       | Nicole Jeffcutt       |      |
| Doncaster | Doncaster Royal Infirmary       | Sharon Ann Allen      |      |

|            |                           |                             |            |
|------------|---------------------------|-----------------------------|------------|
| Doncaster  | Doncaster Royal Infirmary | Janine Smedley (nee McCabe) |            |
| Doncaster  | Doncaster Royal Infirmary | Joanne McNally              | Pharmacist |
| Doncaster  | Doncaster Royal Infirmary | Rachel Codling              |            |
| Doncaster  | Doncaster Royal Infirmary | Barbara Burlace             |            |
| Doncaster  | Doncaster Royal Infirmary | Joanne Derx                 |            |
| Doncaster  | Doncaster Royal Infirmary | Laura Ellis                 |            |
| Doncaster  | Doncaster Royal Infirmary | Lucy Smith                  | Co-I       |
| Doncaster  | Doncaster Royal Infirmary | Sarah Brown                 |            |
| Doncaster  | Doncaster Royal Infirmary | Kim Wood                    |            |
| Dorchester | Dorset County Hospital    | Benjamin Masters            | PI         |
| Dorchester | Dorset County Hospital    | Perric Crellin              |            |
| Dorchester | Dorset County Hospital    | Kate Taylor                 |            |
| Dorchester | Dorset County Hospital    | Ananda Chakrabarti          |            |
| Dorchester | Dorset County Hospital    | Andrew Rees                 |            |
| Dorchester | Dorset County Hospital    | Naveed Afzal                |            |
| Dorchester | Dorset County Hospital    | Robert Blegay               |            |
| Dorchester | Dorset County Hospital    | Stephen Andrews             |            |
| Dorchester | Dorset County Hospital    | Andrew Cornaby              |            |
| Dorchester | Dorset County Hospital    | Andrew Gibbins              |            |
| Dorchester | Dorset County Hospital    | Piet Bakker                 |            |
| Dorchester | Dorset County Hospital    | Simon Sharpe                |            |
| Dorchester | Dorset County Hospital    | Louise O'Shea               |            |
| Dorchester | Dorset County Hospital    | Sally Love                  |            |
| Dorchester | Dorset County Hospital    | Sarah Williams              |            |
| Dorchester | Dorset County Hospital    | Susan Carr                  |            |
| Dorchester | Dorset County Hospital    | Jackie Gibbins              |            |
| Dorchester | Dorset County Hospital    | Josie Goodsell              |            |
| Dorchester | Dorset County Hospital    | Beverley Anderson           |            |
| Dorchester | Dorset County Hospital    | Delia Whiteman              |            |
| Dorchester | Dorset County Hospital    | Laura Bough                 |            |
| Dorchester | Dorset County Hospital    | Stephanie Jones             |            |
| Dorchester | Dorset County Hospital    | Tracy Glen                  |            |
| Dorchester | Dorset County Hospital    | Lynn Billett                |            |
| Dorchester | Dorset County Hospital    | Pauline Ashcroft            | Pharmacist |



|                             |                          |                     |            |
|-----------------------------|--------------------------|---------------------|------------|
| Dorchester                  | Dorset County Hospital   | Sally Breakspear    |            |
| Dorchester                  | Dorset County Hospital   | Sarah Horton        |            |
| Dorchester                  | Dorset County Hospital   | Suzy Wignall        |            |
| Duckworth Lane,<br>Bradford | Bradford Royal Infirmary | Helen Robertshaw    |            |
| Dudley                      | Russells Hall Hospital   | Georgi Georgiev     |            |
| Dudley                      | Russells Hall Hospital   | Joseph Mano         | Co-I       |
| Dudley                      | Russells Hall Hospital   | Pek Keng-Koh        | PI         |
| Dudley                      | Russells Hall Hospital   | Syed Tirmazy        |            |
| Dudley                      | Russells Hall Hospital   | Abel Zachariah      |            |
| Dudley                      | Russells Hall Hospital   | Mano Joseph         | Co-I       |
| Dudley                      | Russells Hall Hospital   | Prakash Ramachandra |            |
| Dudley                      | Russells Hall Hospital   | Emily McDonald      |            |
| Dudley                      | Russells Hall Hospital   | Joann Atkinson      |            |
| Dudley                      | Russells Hall Hospital   | Julie Matthews      |            |
| Dudley                      | Russells Hall Hospital   | Andrew Moores       |            |
| Dudley                      | Russells Hall Hospital   | David Edwards       |            |
| Dudley                      | Russells Hall Hospital   | Lawrence Emtage     |            |
| Dudley                      | Russells Hall Hospital   | Manesh Patel        |            |
| Dudley                      | Russells Hall Hospital   | Paul Anderson       |            |
| Dudley                      | Russells Hall Hospital   | Irene Gardner       |            |
| Dudley                      | Russells Hall Hospital   | Vanessa Moore       | Pharmacist |
| Dudley                      | Russells Hall Hospital   | Ruckie Kahlon       |            |
| Dudley                      | Russells Hall Hospital   | Anna Summerfield    |            |
| Dudley                      | Russells Hall Hospital   | Ellen Shirley       |            |
| Dudley                      | Russells Hall Hospital   | Heather McClure     |            |
| Dudley                      | Russells Hall Hospital   | Karen Pearson       |            |
| Dudley                      | Russells Hall Hospital   | Nadira Jilani       |            |
| Dudley                      | Russells Hall Hospital   | Angela Watts        |            |
| Dudley                      | Russells Hall Hospital   | Dee Harris          |            |
| Dudley                      | Russells Hall Hospital   | Ellie Traverse      |            |
| Dudley                      | Russells Hall Hospital   | Hayley Pearson      |            |
| Dudley                      | Russells Hall Hospital   | Jayne Kanwar        |            |
| Dudley                      | Russells Hall Hospital   | Jenny O'Grady       |            |

|                  |                                      |                            |            |
|------------------|--------------------------------------|----------------------------|------------|
| Dudley           | Russells Hall Hospital               | Karen Kanyi                |            |
| Dudley           | Russells Hall Hospital               | Karen McGarry              |            |
| Dudley           | Russells Hall Hospital               | Lesley Edwards             |            |
| Dudley           | Russells Hall Hospital               | Lucie Smith (nee Williams) | Pharmacist |
| Dudley           | Russells Hall Hospital               | Sally Keates-Porter        |            |
| Dudley           | Russells Hall Hospital               | Sara Smith                 |            |
| Dudley           | Russells Hall Hospital               | Kath Harrow                |            |
| Dundee           | Ninewells Hospital                   | Sangeetha Ponnusamy        |            |
| Durham           | University Hospital of North Durham  | Sarah Welsh                |            |
| Durham           | University Hospital of North Durham  | Rhona McMenemin            |            |
| Durham           | University Hospital of North Durham  | Andrew Parker              |            |
| Durham           | University Hospital of North Durham  | Lorna Morgan               |            |
| Durham           | University Hospital of North Durham  | Dorothy Turnbull           |            |
| Durham           | University Hospital of North Durham  | Jean Dent                  |            |
| Durham           | University Hospital of North Durham  | Jeanette Maughan           |            |
| Durham           | University Hospital of North Durham  | Julie Elliot               | Pharmacist |
| Durham           | University Hospital of North Durham  | Julie Elliott              | Pharmacist |
| East Bournemouth | Royal Bournemouth Hospital           | Nicky Naraine              |            |
| East Sussex      | Eastbourne District General Hospital | Graham Watson              |            |
| Eastbourne       | Eastbourne District General Hospital | Aspasia Soultati           |            |
| Eastbourne       | Conquest Hospital                    | Caroline Manetta           | PI         |
| Eastbourne       | Eastbourne District General Hospital | Caroline Manetta           | PI         |
| Eastbourne       | Conquest Hospital                    | Duncan Gilbert             |            |
| Eastbourne       | Eastbourne District General Hospital | Duncan Gilbert             |            |
| Eastbourne       | Eastbourne District General Hospital | Fiona McKinna              |            |
| Eastbourne       | Eastbourne District General Hospital | Peter Rimington            |            |
| Eastbourne       | Eastbourne District General Hospital | David Sharp                |            |
| Eastbourne       | Eastbourne District General Hospital | Mark Whitfield             |            |
| Eastbourne       | Eastbourne District General Hospital | Neville Sharma             | Pharmacist |
| Eastbourne       | Eastbourne District General Hospital | William Lawrence           |            |
| Eastbourne       | Eastbourne District General Hospital | Jo-Anne Taylor             |            |
| Eastbourne       | Eastbourne District General Hospital | Kay Jones-Skipper          |            |
| Eastbourne       | Eastbourne District General Hospital | Angie Bowey                |            |
| Eastbourne       | Eastbourne District General Hospital | Lauren McCrisken           |            |

|            |                                      |                  |            |
|------------|--------------------------------------|------------------|------------|
| Eastbourne | Eastbourne District General Hospital | Prudence Hobbs   | Pharmacist |
| Eastbourne | Eastbourne District General Hospital | Shelley Baumber  |            |
| Eastbourne | Eastbourne District General Hospital | Theresa Baumber  |            |
| Eastbourne | Eastbourne District General Hospital | Joanna Howard    |            |
| Edinburgh  | Western General Hospital             | Alistair Law     | Co-I       |
| Edinburgh  | Western General Hospital             | Amy Cooper       |            |
| Edinburgh  | Western General Hospital             | Archie Macnar    |            |
| Edinburgh  | Western General Hospital             | Caroline Bruce   |            |
| Edinburgh  | Western General Hospital             | Mark Stares      |            |
| Edinburgh  | Western General Hospital             | Martin Doak      |            |
| Edinburgh  | Western General Hospital             | Olvola Faluyi    |            |
| Edinburgh  | Western General Hospital             | Claire Arthur    |            |
| Edinburgh  | Western General Hospital             | Duncan McLaren   | PI         |
| Edinburgh  | Western General Hospital             | Ewan Brown       |            |
| Edinburgh  | Western General Hospital             | Grahame Howard   |            |
| Edinburgh  | Western General Hospital             | Hannah Lord      |            |
| Edinburgh  | Western General Hospital             | John McGrane     |            |
| Edinburgh  | Western General Hospital             | Katie Wood       |            |
| Edinburgh  | Western General Hospital             | Sanjana Masinghe |            |
| Edinburgh  | Western General Hospital             | Emma Lewis       |            |
| Edinburgh  | Western General Hospital             | Heather Howie    |            |
| Edinburgh  | Western General Hospital             | Nikki Gilluley   | Pharmacist |
| Edinburgh  | Western General Hospital             | Ben Elliott      | Pharmacist |
| Edinburgh  | Western General Hospital             | Jahangeer Malik  | Co-I       |
| Edinburgh  | Western General Hospital             | Richard Allan    |            |
| Edinburgh  | Western General Hospital             | Roland Donat     |            |
| Edinburgh  | Western General Hospital             | Alan McNeill     |            |
| Edinburgh  | Western General Hospital             | Brian Rogers     |            |
| Edinburgh  | Western General Hospital             | David Jeffrey    |            |
| Edinburgh  | Western General Hospital             | David Tulloch    |            |
| Edinburgh  | Western General Hospital             | Prasad Bollina   |            |
| Edinburgh  | Western General Hospital             | Lynn Ho          |            |
| Edinburgh  | Western General Hospital             | Vivienne Wilson  |            |
| Edinburgh  | Western General Hospital             | Barbara Mayne    |            |

|           |                          |                       |            |
|-----------|--------------------------|-----------------------|------------|
| Edinburgh | Western General Hospital | Alison Clark          |            |
| Edinburgh | Western General Hospital | Alison McKinlay       |            |
| Edinburgh | Western General Hospital | Beverley Mitchell     |            |
| Edinburgh | Western General Hospital | Catherine Woods       |            |
| Edinburgh | Western General Hospital | Jennifer Baxter       |            |
| Edinburgh | Western General Hospital | Kirsty Peebles        |            |
| Edinburgh | Western General Hospital | Sarah Thompson        |            |
| Edinburgh | Western General Hospital | Tracy Brear           |            |
| Edinburgh | Western General Hospital | Ailsa Liddle          |            |
| Edinburgh | Western General Hospital | Andrea Stanton        |            |
| Edinburgh | Western General Hospital | Ann Cochrane          |            |
| Edinburgh | Western General Hospital | Fiona Gardiner        |            |
| Edinburgh | Western General Hospital | Fionagh Ross          | Pharmacist |
| Edinburgh | Western General Hospital | Hazel Milligan        |            |
| Edinburgh | Western General Hospital | Heather Dalrymple     |            |
| Edinburgh | Western General Hospital | Heather McVicar       |            |
| Edinburgh | Western General Hospital | Lisa Egan             |            |
| Edinburgh | Western General Hospital | Lois Pollock          |            |
| Edinburgh | Western General Hospital | Susan Forman          |            |
| Edinburgh | Western General Hospital | Theresa Savage        |            |
| Edmonton  | North Middlesex Hospital | Anna Thompson         |            |
| Edmonton  | North Middlesex Hospital | Lucinda Melcher       |            |
| Edmonton  | North Middlesex Hospital | Mausam Singhera       |            |
| Edmonton  | North Middlesex Hospital | Nishi Gupta           | PI         |
| Edmonton  | North Middlesex Hospital | Stephen Karp          |            |
| Edmonton  | North Middlesex Hospital | Ursula McGovern       |            |
| Edmonton  | North Middlesex Hospital | Ayesha Ahmed Surti    |            |
| Edmonton  | North Middlesex Hospital | Chloe Van Someren     |            |
| Edmonton  | North Middlesex Hospital | Sagal Kullane         |            |
| Edmonton  | North Middlesex Hospital | Girish Bhome          | Pharmacist |
| Edmonton  | North Middlesex Hospital | Tom Caumont           |            |
| Edmonton  | North Middlesex Hospital | Tessa Light           |            |
| Edmonton  | North Middlesex Hospital | Kerri Rees            |            |
| Edmonton  | North Middlesex Hospital | Beatrice Balachandran |            |

|          |                                 |                         |      |
|----------|---------------------------------|-------------------------|------|
| Edmonton | North Middlesex Hospital        | Bernadette Collins      |      |
| Edmonton | North Middlesex Hospital        | Ferrial Syed            |      |
| Edmonton | North Middlesex Hospital        | Kathy O'Farrell         |      |
| Edmonton | North Middlesex Hospital        | Pauline Lee             |      |
| Exeter   | Royal Devon and Exeter Hospital | Ayman Nassar            |      |
| Exeter   | Royal Devon and Exeter Hospital | David Jonathan Chambers |      |
| Exeter   | Royal Devon and Exeter Hospital | Lyndon Ridges-Jones     | Co-I |
| Exeter   | Royal Devon and Exeter Hospital | Mohini Varughese        | PI   |
| Exeter   | Royal Devon and Exeter Hospital | Natalie Nityey          |      |
| Exeter   | Royal Devon and Exeter Hospital | Peter Stephens          | Co-I |
| Exeter   | Royal Devon and Exeter Hospital | Shiv Uppal              |      |
| Exeter   | Royal Devon and Exeter Hospital | Victoria Ford           | Co-I |
| Exeter   | Royal Devon and Exeter Hospital | Anne Hong               |      |
| Exeter   | Royal Devon and Exeter Hospital | Denise Sheehan          |      |
| Exeter   | Royal Devon and Exeter Hospital | Elizabeth Toy           |      |
| Exeter   | Royal Devon and Exeter Hospital | Rajaguru Srinivasan     | Co-I |
| Exeter   | Royal Devon and Exeter Hospital | San Aung                | Co-I |
| Exeter   | Royal Devon and Exeter Hospital | Tim Norris              |      |
| Exeter   | Royal Devon and Exeter Hospital | Ceri Davies             |      |
| Exeter   | Royal Devon and Exeter Hospital | Eleonor (Alethea) Brown |      |
| Exeter   | Royal Devon and Exeter Hospital | Grace Justice           |      |
| Exeter   | Royal Devon and Exeter Hospital | Kerri-ellen Oakley      |      |
| Exeter   | Royal Devon and Exeter Hospital | Sophie James            |      |
| Exeter   | Royal Devon and Exeter Hospital | Stephanie Ann Ellis     |      |
| Exeter   | Royal Devon and Exeter Hospital | Theresa Lawless         |      |
| Exeter   | Royal Devon and Exeter Hospital | Susan Downer            |      |
| Exeter   | Royal Devon and Exeter Hospital | Alan Betts              |      |
| Exeter   | Royal Devon and Exeter Hospital | James Leavy             |      |
| Exeter   | Royal Devon and Exeter Hospital | Matt Trivett            |      |
| Exeter   | Royal Devon and Exeter Hospital | Petar Hitev             |      |
| Exeter   | Royal Devon and Exeter Hospital | Christoph Lohan         |      |
| Exeter   | Royal Devon and Exeter Hospital | John Anderson           |      |
| Exeter   | Royal Devon and Exeter Hospital | Ross Curwen             |      |
| Exeter   | Royal Devon and Exeter Hospital | Elaine Vandcandelaere   |      |

|            |                                 |                          |            |
|------------|---------------------------------|--------------------------|------------|
| Exeter     | Royal Devon and Exeter Hospital | Emma Guerin              |            |
| Exeter     | Royal Devon and Exeter Hospital | Frances Hood             |            |
| Exeter     | Royal Devon and Exeter Hospital | Melissa Davey            |            |
| Exeter     | Royal Devon and Exeter Hospital | Alison Augstburger       |            |
| Exeter     | Royal Devon and Exeter Hospital | Claire Webb              |            |
| Exeter     | Royal Devon and Exeter Hospital | Emma Robjohns            |            |
| Exeter     | Royal Devon and Exeter Hospital | Ingrid Seath             |            |
| Exeter     | Royal Devon and Exeter Hospital | Kate O'Connor            |            |
| Exeter     | Royal Devon and Exeter Hospital | Alison Roantree          |            |
| Exeter     | Royal Devon and Exeter Hospital | Jane Piper               |            |
| Exeter     | Royal Devon and Exeter Hospital | Rosie Mew                | Co-I       |
| Exeter     | Royal Devon and Exeter Hospital | Sophie Warren            |            |
| Exeter     | Royal Devon and Exeter Hospital | Susan Davenport          | Pharmacist |
| Exeter     | Royal Devon and Exeter Hospital | Tracey Foss              |            |
| Exeter     | Royal Devon and Exeter Hospital | Beverley Kemp            |            |
| Exeter     | Royal Devon and Exeter Hospital | Claire Ridler            |            |
| Exeter     | Royal Devon and Exeter Hospital | Dawn Edwards             |            |
| Exeter     | Royal Devon and Exeter Hospital | Elizabeth Davey          |            |
| Exeter     | Royal Devon and Exeter Hospital | Fiona Walters (nee Hall) | Pharmacist |
| Exeter     | Royal Devon and Exeter Hospital | Kizzy Baines             |            |
| Exeter     | Royal Devon and Exeter Hospital | Lyndel Moore             |            |
| Exeter     | Royal Devon and Exeter Hospital | Shirley Todd             | Pharmacist |
| Exeter     | Royal Devon and Exeter Hospital | Suzy Tasker              |            |
| Exeter     | Royal Devon and Exeter Hospital | Tamika Chapter           | Pharmacist |
| Fulwood    | Blackburn Royal Infirmary       | Natalie Charnley         |            |
| Fulwood    | Burnley General Hospital        | Natalie Charnley         |            |
| Fulwood    | Royal Preston Hospital          | Hazel Aston              |            |
| Gillingham | Medway Maritime Hospital        | Afroditi Karathanasi     |            |
| Gillingham | Medway Maritime Hospital        | Diletta Bianchini        |            |
| Gillingham | Medway Maritime Hospital        | Stergios Boussios        | PI         |
| Gillingham | Medway Maritime Hospital        | Swapna Thomas            |            |
| Gillingham | Medway Maritime Hospital        | Charlotte Abson          | Co-I       |
| Gillingham | Medway Maritime Hospital        | Christos Mikropoulos     | Co-I       |
| Gillingham | Medway Maritime Hospital        | Henry Taylor             | PI         |

|            |                          |                        |            |
|------------|--------------------------|------------------------|------------|
| Gillingham | Medway Maritime Hospital | Tessa Lawrence         |            |
| Gillingham | Medway Maritime Hospital | Agne Sadauskaite       |            |
| Gillingham | Medway Maritime Hospital | Corinne Borley         |            |
| Gillingham | Medway Maritime Hospital | Durga Maya Gurung      |            |
| Gillingham | Medway Maritime Hospital | Jodie Seymour          |            |
| Gillingham | Medway Maritime Hospital | Mary Everett           |            |
| Gillingham | Medway Maritime Hospital | Charles Davis          |            |
| Gillingham | Medway Maritime Hospital | James Sawyer           | Pharmacist |
| Gillingham | Medway Maritime Hospital | Kevin Naicker          |            |
| Gillingham | Medway Maritime Hospital | Khalid Abdalla         | Pharmacist |
| Gillingham | Medway Maritime Hospital | Peter Milverton        |            |
| Gillingham | Medway Maritime Hospital | Philip Adeniran        |            |
| Gillingham | Medway Maritime Hospital | Simon Wan              |            |
| Gillingham | Medway Maritime Hospital | Parool Darbar          | Pharmacist |
| Gillingham | Medway Maritime Hospital | Richard Thornton       |            |
| Gillingham | Medway Maritime Hospital | Alba Tuban             |            |
| Gillingham | Medway Maritime Hospital | Alison Richards        |            |
| Gillingham | Medway Maritime Hospital | Clarissa Madla         |            |
| Gillingham | Medway Maritime Hospital | Deirdre Cooke          |            |
| Gillingham | Medway Maritime Hospital | Elizabeth Newman-Horne |            |
| Gillingham | Medway Maritime Hospital | Gayzel Vallejera       |            |
| Gillingham | Medway Maritime Hospital | Katarzyna Urbanczyk    |            |
| Gillingham | Medway Maritime Hospital | Kay Jones              |            |
| Gillingham | Medway Maritime Hospital | Lisa Parker            |            |
| Gillingham | Medway Maritime Hospital | Louise Black           |            |
| Gillingham | Medway Maritime Hospital | Louise Brassington     |            |
| Gillingham | Medway Maritime Hospital | Marie Louise Hollands  |            |
| Gillingham | Medway Maritime Hospital | Nicola Southwell       |            |
| Gillingham | Medway Maritime Hospital | Emma Sutton            |            |
| Gillingham | Medway Maritime Hospital | Judy Filmer            |            |
| Gillingham | Medway Maritime Hospital | Suzie Reyner           |            |
| Gillingham | Medway Maritime Hospital | Adedolapo Sanni        |            |
| Gillingham | Medway Maritime Hospital | Carol Mayger           | Pharmacist |
| Gillingham | Medway Maritime Hospital | Tamara Diamond         |            |

|         |                                        |                   |      |
|---------|----------------------------------------|-------------------|------|
| Glasgow | Beatson West of Scotland Cancer Centre | Aisha Tufail      |      |
| Glasgow | Beatson West of Scotland Cancer Centre | Almudena Cascales |      |
| Glasgow | Beatson West of Scotland Cancer Centre | Ashleigh Kerr     |      |
| Glasgow | Beatson West of Scotland Cancer Centre | Brendan McCann    |      |
| Glasgow | Beatson West of Scotland Cancer Centre | Cicely Cunningham |      |
| Glasgow | Beatson West of Scotland Cancer Centre | Derek Grose       | Co-I |
| Glasgow | Beatson West of Scotland Cancer Centre | Ian Sanders       |      |
| Glasgow | Beatson West of Scotland Cancer Centre | Jawaher Ansari    |      |
| Glasgow | Beatson West of Scotland Cancer Centre | Kathryn Banfill   | Co-I |
| Glasgow | Beatson West of Scotland Cancer Centre | Miranda Ashton    |      |
| Glasgow | Beatson West of Scotland Cancer Centre | Rebecca Muirhead  |      |
| Glasgow | Beatson West of Scotland Cancer Centre | Stephen McKay     |      |
| Glasgow | Beatson West of Scotland Cancer Centre | Abdulla Al-hasso  |      |
| Glasgow | Beatson West of Scotland Cancer Centre | Aqilah Othman     |      |
| Glasgow | Beatson West of Scotland Cancer Centre | Awris Jalil       |      |
| Glasgow | Beatson West of Scotland Cancer Centre | Azmat Sadozye     |      |
| Glasgow | Beatson West of Scotland Cancer Centre | Balaji Venugopal  |      |
| Glasgow | Beatson West of Scotland Cancer Centre | Ben Fulton        |      |
| Glasgow | Beatson West of Scotland Cancer Centre | Carolynn Lamb     | Co-I |
| Glasgow | Beatson West of Scotland Cancer Centre | Christina Wilson  |      |
| Glasgow | Beatson West of Scotland Cancer Centre | David Dodds       |      |
| Glasgow | Beatson West of Scotland Cancer Centre | Esfandiyar Khan   |      |
| Glasgow | Beatson West of Scotland Cancer Centre | Hilary Glen       |      |
| Glasgow | Beatson West of Scotland Cancer Centre | Husam Marashi     |      |
| Glasgow | Beatson West of Scotland Cancer Centre | Jan Wallace       |      |
| Glasgow | Beatson West of Scotland Cancer Centre | Janet Graham      |      |
| Glasgow | Beatson West of Scotland Cancer Centre | John Graham       | PI   |
| Glasgow | Beatson West of Scotland Cancer Centre | Kathryn Graham    |      |
| Glasgow | Beatson West of Scotland Cancer Centre | Lye Mun Tho       |      |
| Glasgow | Beatson West of Scotland Cancer Centre | Martin Russell    |      |
| Glasgow | Beatson West of Scotland Cancer Centre | Maryon Hardie     |      |
| Glasgow | Beatson West of Scotland Cancer Centre | Mohammed Alfayez  |      |
| Glasgow | Beatson West of Scotland Cancer Centre | Nicholas Macleod  |      |
| Glasgow | Beatson West of Scotland Cancer Centre | Norma Sidek       |      |



|         |                                        |                        |            |
|---------|----------------------------------------|------------------------|------------|
| Glasgow | Beatson West of Scotland Cancer Centre | Patricia Roxburgh      |            |
| Glasgow | Beatson West of Scotland Cancer Centre | Paula Henry-Stephenson |            |
| Glasgow | Beatson West of Scotland Cancer Centre | Rana Mahmood           |            |
| Glasgow | Beatson West of Scotland Cancer Centre | Rob Jones              | PI         |
| Glasgow | Beatson West of Scotland Cancer Centre | Sally Hall             |            |
| Glasgow | Beatson West of Scotland Cancer Centre | Saranya Kakumanu       |            |
| Glasgow | Beatson West of Scotland Cancer Centre | Sophie Barrett         |            |
| Glasgow | Beatson West of Scotland Cancer Centre | Stefan Nowicki         |            |
| Glasgow | Beatson West of Scotland Cancer Centre | Tareq Abdullah         |            |
| Glasgow | Beatson West of Scotland Cancer Centre | Diann Taggart          |            |
| Glasgow | Beatson West of Scotland Cancer Centre | Katie Galbraith        |            |
| Glasgow | Beatson West of Scotland Cancer Centre | Nicola Cairns          |            |
| Glasgow | Beatson West of Scotland Cancer Centre | Gerard Forrest         |            |
| Glasgow | Beatson West of Scotland Cancer Centre | Calum Innes            |            |
| Glasgow | Beatson West of Scotland Cancer Centre | Graeme Lumsden         |            |
| Glasgow | Beatson West of Scotland Cancer Centre | Martin Ball            | Pharmacist |
| Glasgow | Beatson West of Scotland Cancer Centre | Nathan Richardson      |            |
| Glasgow | Beatson West of Scotland Cancer Centre | Ross Carruthers        |            |
| Glasgow | Beatson West of Scotland Cancer Centre | Hannah Weir            |            |
| Glasgow | Beatson West of Scotland Cancer Centre | Linzi Rae              |            |
| Glasgow | Beatson West of Scotland Cancer Centre | Maureen Connolly       |            |
| Glasgow | Beatson West of Scotland Cancer Centre | Ailsa Griffen          |            |
| Glasgow | Beatson West of Scotland Cancer Centre | Jacqueline Gourlay     | Pharmacist |
| Glasgow | Beatson West of Scotland Cancer Centre | Jan Graham             |            |
| Glasgow | Beatson West of Scotland Cancer Centre | Karen Bell             |            |
| Glasgow | Beatson West of Scotland Cancer Centre | Alice Coy              |            |
| Glasgow | Beatson West of Scotland Cancer Centre | Gemma Johnson          |            |
| Glasgow | Beatson West of Scotland Cancer Centre | Gillian Barmack        |            |
| Glasgow | Beatson West of Scotland Cancer Centre | Jennifer Petrie        |            |
| Glasgow | Beatson West of Scotland Cancer Centre | Annette Charlick       |            |
| Glasgow | Beatson West of Scotland Cancer Centre | Antonia MacMillan      |            |
| Glasgow | Beatson West of Scotland Cancer Centre | Catriona Cowan         |            |
| Glasgow | Beatson West of Scotland Cancer Centre | Claire Steele          |            |
| Glasgow | Beatson West of Scotland Cancer Centre | Fiona McQueen          | Pharmacist |

|            |                                        |                              |            |
|------------|----------------------------------------|------------------------------|------------|
| Glasgow    | Beatson West of Scotland Cancer Centre | Jenny Brown                  | Pharmacist |
| Glasgow    | Beatson West of Scotland Cancer Centre | Judith Dixon                 |            |
| Glasgow    | Beatson West of Scotland Cancer Centre | Kirsteen Stuart              |            |
| Glasgow    | Beatson West of Scotland Cancer Centre | Kirsten Laws (nee Borthwick) |            |
| Glasgow    | Beatson West of Scotland Cancer Centre | Lorraine Barwell             |            |
| Glasgow    | Beatson West of Scotland Cancer Centre | Louise Bruce                 |            |
| Glasgow    | Beatson West of Scotland Cancer Centre | Lynne Grieve                 |            |
| Glasgow    | Beatson West of Scotland Cancer Centre | Maria Nicol                  |            |
| Glasgow    | Beatson West of Scotland Cancer Centre | Patricia Baird               |            |
| Glasgow    | Beatson West of Scotland Cancer Centre | Ruth Orr                     |            |
| Glasgow    | Beatson West of Scotland Cancer Centre | Sai Juan Jia                 |            |
| Gloucester | Gloucestershire Royal Hospital         | Laura Malins                 |            |
| Gloucester | Gloucestershire Royal Hospital         | Sai Jonnada                  |            |
| Gloucester | Gloucestershire Royal Hospital         | Victoria Bell                |            |
| Gloucester | Gloucestershire Royal Hospital         | Audrey Cook                  |            |
| Gloucester | Gloucestershire Royal Hospital         | Jo Bowen                     | PI         |
| Gloucester | Gloucestershire Royal Hospital         | Peter Jenkins                | Co-I       |
| Gloucester | Gloucestershire Royal Hospital         | Roger Owen                   |            |
| Gloucester | Gloucestershire Royal Hospital         | Amy Skelton                  |            |
| Gloucester | Gloucestershire Royal Hospital         | Bethan Cartwright            |            |
| Gloucester | Gloucestershire Royal Hospital         | Sarah Stanley                |            |
| Gloucester | Gloucestershire Royal Hospital         | Sarah Beazer                 |            |
| Gloucester | Gloucestershire Royal Hospital         | Samuel Croly                 |            |
| Gloucester | Gloucestershire Royal Hospital         | Richard Wallis               |            |
| Gloucester | Gloucestershire Royal Hospital         | Julia Hall                   |            |
| Gloucester | Gloucestershire Royal Hospital         | Julie Allen                  |            |
| Gloucester | Gloucestershire Royal Hospital         | Lin Crossley                 |            |
| Gloucester | Gloucestershire Royal Hospital         | Rachel Sayers                |            |
| Gloucester | Gloucestershire Royal Hospital         | Chris Ford                   |            |
| Gloucester | Gloucestershire Royal Hospital         | Kate Trigg-Hogarth           |            |
| Gloucester | Gloucestershire Royal Hospital         | Sue Wronski                  |            |
| Gloucester | Gloucestershire Royal Hospital         | Abi Stuart                   |            |
| Gloucester | Gloucestershire Royal Hospital         | Charlotte Ayrton             |            |
| Gloucester | Gloucestershire Royal Hospital         | Claire Salter                |            |

|            |                                |                        |      |
|------------|--------------------------------|------------------------|------|
| Gloucester | Gloucestershire Royal Hospital | Elaine Sizer           |      |
| Gloucester | Gloucestershire Royal Hospital | Elisabeth Read         |      |
| Gloucester | Gloucestershire Royal Hospital | Louise Moore           |      |
| Gloucester | Gloucestershire Royal Hospital | Sarah Matthews         |      |
| Glouster   | Gloucestershire Royal Hospital | Janet Forkes           |      |
| Guildford  | Royal Surrey County Hospital   | Carla Perna            | PI   |
| Guildford  | Royal Surrey County Hospital   | Emmanuel Larbi         |      |
| Guildford  | Royal Surrey County Hospital   | James Lowe             |      |
| Guildford  | Royal Surrey County Hospital   | Leslie Cheng           | Co-I |
| Guildford  | Royal Surrey County Hospital   | Mahwish Karim          | Co-I |
| Guildford  | Royal Surrey County Hospital   | Melanie Bofo-Yirenkyi  |      |
| Guildford  | Royal Surrey County Hospital   | Sara Khaksar           |      |
| Guildford  | Royal Surrey County Hospital   | Charlotte Shelley      |      |
| Guildford  | Royal Surrey County Hospital   | Jenny Nobes            |      |
| Guildford  | Royal Surrey County Hospital   | Joanna Stokoe          |      |
| Guildford  | Royal Surrey County Hospital   | Julian Money-Kyrle     |      |
| Guildford  | Royal Surrey County Hospital   | Katie Wood             |      |
| Guildford  | Royal Surrey County Hospital   | Katie Wood             |      |
| Guildford  | Royal Surrey County Hospital   | Mahomed Moosa          |      |
| Guildford  | Royal Surrey County Hospital   | Maria Drzymala         |      |
| Guildford  | Royal Surrey County Hospital   | Richard Shaffer        |      |
| Guildford  | Royal Surrey County Hospital   | Robert Laing           |      |
| Guildford  | Royal Surrey County Hospital   | Sree Susaria           |      |
| Guildford  | Royal Surrey County Hospital   | Teresa Guerrero-Urbano |      |
| Guildford  | Royal Surrey County Hospital   | Imogen Heenan          |      |
| Guildford  | Royal Surrey County Hospital   | Kavita Bhat            |      |
| Guildford  | Royal Surrey County Hospital   | Lesley Harden          |      |
| Guildford  | Royal Surrey County Hospital   | Nick Pilkington        |      |
| Guildford  | Royal Surrey County Hospital   | Richmond Abeseabe      |      |
| Guildford  | Royal Surrey County Hospital   | Angela Morgan          |      |
| Guildford  | Royal Surrey County Hospital   | Miriam White           |      |
| Guildford  | Royal Surrey County Hospital   | Adele Hugg             |      |
| Guildford  | Royal Surrey County Hospital   | Caterina Bissa         |      |
| Guildford  | Royal Surrey County Hospital   | Jane Woods             |      |

|           |                                      |                      |            |
|-----------|--------------------------------------|----------------------|------------|
| Guildford | Royal Surrey County Hospital         | Julie Wilkinson      |            |
| Guildford | Royal Surrey County Hospital         | Veronica Davis       |            |
| Guildford | Royal Surrey County Hospital         | Frances Sidi         |            |
| Guildford | Royal Surrey County Hospital         | Jen Julius           |            |
| Guildford | Royal Surrey County Hospital         | Julia Whittle        |            |
| Guildford | Royal Surrey County Hospital         | Kate Penhaligon      |            |
| Guildford | Royal Surrey County Hospital         | Kathrin Narvaez-Vega | Pharmacist |
| Guildford | Royal Surrey County Hospital         | Lucinda Scott        |            |
| Guildford | Royal Surrey County Hospital         | Marianne Dabbs       |            |
| Guildford | Royal Surrey County Hospital         | Stephy Joseph        |            |
| Guildford | Royal Surrey County Hospital         | Catherine Medcalf    | Pharmacist |
| Guildford | Royal Surrey County Hospital         | Celia Harris         |            |
| Guildford | Royal Surrey County Hospital         | Daisy Floyd          |            |
| Guildford | Royal Surrey County Hospital         | Fiona Butler         | Pharmacist |
| Guildford | Royal Surrey County Hospital         | Linda Nardone        |            |
| Guildford | Royal Surrey County Hospital         | Sarah De Swert       |            |
| Guildford | Royal Surrey County Hospital         | Sue Sargent          |            |
| Guildford | Royal Surrey County Hospital         | Teresa Keating       |            |
| Guildford | Royal Surrey County Hospital         | Zephyrine King       |            |
| Halifax   | Calderdale Royal Hospital            | Miranda Usher        |            |
| Halifax   | Calderdale Royal Hospital            | Lisa Gledhill        |            |
| Halton    | Halton Hospital                      | Carrie Lowthian      |            |
| Hampstead | Royal Free Hospital                  | R Bradford           |            |
| Harlow    | Princess Alexandra Hospital (Harlow) | Albert Edwards       |            |
| Harlow    | Princess Alexandra Hospital (Harlow) | Hamoun Rozati        | Co-I       |
| Harlow    | Princess Alexandra Hospital (Harlow) | Paul Kabuubi         |            |
| Harlow    | Princess Alexandra Hospital (Harlow) | Shroma De Silva      |            |
| Harlow    | Princess Alexandra Hospital (Harlow) | Tasia Aghadiuno      | Co-I       |
| Harlow    | Princess Alexandra Hospital (Harlow) | Zainab Wasim         | Co-I       |
| Harlow    | Princess Alexandra Hospital (Harlow) | Anna Lerner          | Co-I       |
| Harlow    | Princess Alexandra Hospital (Harlow) | Lucinda Melcher      | PI         |
| Harlow    | Princess Alexandra Hospital (Harlow) | Nishi Gupta          | Co-I       |
| Harlow    | Princess Alexandra Hospital (Harlow) | Reena Davda          |            |
| Harlow    | Princess Alexandra Hospital (Harlow) | Reena Davda          | Co-I       |

|                |                                      |                            |            |
|----------------|--------------------------------------|----------------------------|------------|
| Harlow         | Princess Alexandra Hospital (Harlow) | Nikki White (nee Staines)  |            |
| Harlow         | Princess Alexandra Hospital (Harlow) | Sylwia Golaszewska         |            |
| Harlow         | Princess Alexandra Hospital (Harlow) | Ahmed Hnoosh               |            |
| Harlow         | Princess Alexandra Hospital (Harlow) | Ervin Shpuza               |            |
| Harlow         | Princess Alexandra Hospital (Harlow) | Sunjalee Fernando          | Pharmacist |
| Harlow         | Princess Alexandra Hospital (Harlow) | Cait Rees                  |            |
| Harlow         | Princess Alexandra Hospital (Harlow) | Amanda Lewis               |            |
| Harlow         | Princess Alexandra Hospital (Harlow) | Amelia Daniel              |            |
| Harlow         | Princess Alexandra Hospital (Harlow) | Amy Lewis                  |            |
| Harlow         | Princess Alexandra Hospital (Harlow) | Gemma Cook                 |            |
| Harlow         | Princess Alexandra Hospital (Harlow) | Hana Malinkovicova         |            |
| Harlow         | Princess Alexandra Hospital (Harlow) | Joanne Kellaway            |            |
| Harlow         | Princess Alexandra Hospital (Harlow) | Tracey White               |            |
| Harlow         | Princess Alexandra Hospital (Harlow) | Evelyn Holmes              | Pharmacist |
| Harlow         | Princess Alexandra Hospital (Harlow) | Jodie Johnson              |            |
| Harlow         | Princess Alexandra Hospital (Harlow) | Teresa Light               |            |
| Haverford West | Withybush General Hospital           | Sandra Griffiths nee Evens |            |
| Headington     | Churchill Hospital                   | James Wakelin              |            |
| Headington     | Churchill Hospital                   | Jane Gibbard               |            |
| Headington     | Churchill Hospital                   | Leigh Burns                |            |
| Headington     | Churchill Hospital                   | Sandie Wellman             |            |
| Hereford       | Hereford County Hospital             | Caitlin Bowden             |            |
| Hereford       | Hereford County Hospital             | Cara Watson                |            |
| Hereford       | Hereford County Hospital             | David Stow                 |            |
| Hereford       | Hereford County Hospital             | Timothy Spencer            |            |
| Hereford       | Hereford County Hospital             | Vishal Bhalla              |            |
| Hereford       | Hereford County Hospital             | Warren Grant               | PI         |
| Hereford       | Hereford County Hospital             | Audrey Cook                |            |
| Hereford       | Hereford County Hospital             | Duncan Stow                |            |
| Hereford       | Hereford County Hospital             | Maxine Flubacher           |            |
| Hereford       | Hereford County Hospital             | Nina Reeve                 |            |
| Hereford       | Hereford County Hospital             | Bethan Richards            |            |
| Hereford       | Hereford County Hospital             | Jolanta PUESKACZ           |            |
| Hereford       | Hereford County Hospital             | Linda Moseley              | Pharmacist |

|          |                          |                            |            |
|----------|--------------------------|----------------------------|------------|
| Hereford | Hereford County Hospital | Lisa King                  |            |
| Hereford | Hereford County Hospital | Nicola Williamson          |            |
| Hereford | Hereford County Hospital | Sarah Chapman              |            |
| Hereford | Hereford County Hospital | Serrafina Carini           |            |
| Hereford | Hereford County Hospital | Sophie Cooper              |            |
| Hereford | Hereford County Hospital | Stacey Turner              |            |
| Hereford | Hereford County Hospital | Harriet Taylor             |            |
| Hereford | Hereford County Hospital | Jagdish Chana              | Pharmacist |
| Hereford | Hereford County Hospital | Terry Watson               |            |
| Hereford | Hereford County Hospital | Andy Hedges                | Pharmacist |
| Hereford | Hereford County Hospital | Amanda Davies              |            |
| Hereford | Hereford County Hospital | Isabel Martin (Whitehouse) |            |
| Hereford | Hereford County Hospital | June Thomas                |            |
| Hereford | Hereford County Hospital | Laura Lees                 |            |
| Hereford | Hereford County Hospital | Melanie Evans              |            |
| Hereford | Hereford County Hospital | Rebecca Bengree            |            |
| Hereford | Hereford County Hospital | Susan Anderson             |            |
| Hereford | Hereford County Hospital | Zara Roberts               |            |
| Hereford | Hereford County Hospital | Bethany Wellington         |            |
| Hereford | Hereford County Hospital | Janine Jones (Birch)       |            |
| Hereford | Hereford County Hospital | Naeem Musani               |            |
| Hereford | Hereford County Hospital | Susan Anderson             |            |
| Hereford | Hereford County Hospital | Caroline Thomas            | Pharmacist |
| Hereford | Hereford County Hospital | Catherine Reed             |            |
| Hereford | Hereford County Hospital | Claire Hughes              |            |
| Hereford | Hereford County Hospital | Gill Horsfield             |            |
| Hereford | Hereford County Hospital | Jenny Howls                | Pharmacist |
| Hereford | Hereford County Hospital | Kate Hammerton             |            |
| Hereford | Hereford County Hospital | Rachel Lowe                |            |
| Hereford | Hereford County Hospital | Sophie Boyd (nee Evans)    |            |
| Hereford | Hereford County Hospital | Anita Ashton               |            |
| Hereford | Hereford County Hospital | Janet Forkes               |            |
| Hereford | Hereford County Hospital | Sophie Boyd                |            |
| Herts    | Lister Hospital          | Rachel Low                 |            |

|              |                           |                         |            |
|--------------|---------------------------|-------------------------|------------|
| High Wycombe | Wycombe Hospital          | Ami Sabharwal           | PI         |
| High Wycombe | Wycombe Hospital          | Avinash Gupta           |            |
| High Wycombe | Wycombe Hospital          | Janice Carpenter        |            |
| High Wycombe | Wycombe Hospital          | Katherine Hyde          | PI         |
| High Wycombe | Wycombe Hospital          | Thinn Pwint             | Co-I       |
| High Wycombe | Wycombe Hospital          | Benjamin Fairfax        |            |
| High Wycombe | Wycombe Hospital          | Gerard Andrade          | Co-I       |
| High Wycombe | Wycombe Hospital          | Niki Panakis            |            |
| High Wycombe | Wycombe Hospital          | Philip Camilleri        | Co-I       |
| High Wycombe | Wycombe Hospital          | Prabir Chakraborti      | Co-I       |
| High Wycombe | Wycombe Hospital          | Sally Trent             |            |
| High Wycombe | Wycombe Hospital          | Sean O'Cathail          | Co-I       |
| High Wycombe | Wycombe Hospital          | Vivek Mohan             |            |
| High Wycombe | Wycombe Hospital          | Wasiru Saka             |            |
| High Wycombe | Stoke Mandeville Hospital | Chrissie Butcher        |            |
| High Wycombe | Wycombe Hospital          | Chrissie Butcher        |            |
| High Wycombe | Wycombe Hospital          | Claire Fernandez        |            |
| High Wycombe | Wycombe Hospital          | Amarjit Bdesha          |            |
| High Wycombe | Wycombe Hospital          | Moncy Mathew            |            |
| High Wycombe | Wycombe Hospital          | Neil Haldar             |            |
| High Wycombe | Wycombe Hospital          | Rahul Kurup             |            |
| High Wycombe | Wycombe Hospital          | John Patrick Kelleher   |            |
| High Wycombe | Wycombe Hospital          | Neil Trew-Smith         |            |
| High Wycombe | Wycombe Hospital          | Alice Ngumo             |            |
| High Wycombe | Wycombe Hospital          | Anita Cserbane          |            |
| High Wycombe | Wycombe Hospital          | Gail Varley             |            |
| High Wycombe | Wycombe Hospital          | Janet Weir              |            |
| High Wycombe | Wycombe Hospital          | Manisha Joshi           |            |
| High Wycombe | Wycombe Hospital          | Penny Carter            |            |
| High Wycombe | Wycombe Hospital          | Siobhan Gettings        |            |
| High Wycombe | Wycombe Hospital          | Maggie Aldersley        |            |
| High Wycombe | Wycombe Hospital          | Michelle Taylor-Siddons | Pharmacist |
| High Wycombe | Wycombe Hospital          | Tracey Stammers         |            |
| High Wycombe | Wycombe Hospital          | Ans-Mari Bester         |            |

|              |                              |                         |            |
|--------------|------------------------------|-------------------------|------------|
| High Wycombe | Wycombe Hospital             | Aruna Nair              |            |
| High Wycombe | Wycombe Hospital             | Catherine Northey       |            |
| High Wycombe | Wycombe Hospital             | Emma Hogbin             |            |
| High Wycombe | Wycombe Hospital             | Erica Lieberman         | Pharmacist |
| High Wycombe | Wycombe Hospital             | Helena Stone            |            |
| High Wycombe | Wycombe Hospital             | Kathryn Herbert         |            |
| High Wycombe | Wycombe Hospital             | Rossana Mancinelli      |            |
| High Wycombe | Wycombe Hospital             | Samantha Thomas         |            |
| High Wycombe | Wycombe Hospital             | Sarah Manyangadze       |            |
| High Wycombe | Wycombe Hospital             | Susan McLain-Smith      |            |
| High Wycombe | Wycombe Hospital             | Tiffany Chan            | Pharmacist |
| High Wycombe | Stoke Mandeville Hospital    | Bhavna Badiani          |            |
| High Wycombe | Wycombe Hospital             | Bhavna Badiani          |            |
| High Wycombe | Wycombe Hospital             | Christine Collins       |            |
| High Wycombe | Wycombe Hospital             | Evelyn Chan             |            |
| High Wycombe | Wycombe Hospital             | Hazel Wynn              |            |
| High Wycombe | Wycombe Hospital             | Ileana Nguyen           |            |
| High Wycombe | Wycombe Hospital             | Jasvinder Bains         |            |
| High Wycombe | Wycombe Hospital             | Nicola Bowers           |            |
| High Wycombe | Wycombe Hospital             | Roisin Kavanagh         |            |
| High Wycombe | Wycombe Hospital             | Andrew Protheroe        |            |
| Huddersfield | Huddersfield Royal Infirmary | Omer Babiker            | Co-I       |
| Huddersfield | Huddersfield Royal Infirmary | Rob Turner              |            |
| Huddersfield | Huddersfield Royal Infirmary | Samantha Turnbull       | Co-I       |
| Huddersfield | Huddersfield Royal Infirmary | Barbara Crosse          |            |
| Huddersfield | Huddersfield Royal Infirmary | Emma Woodward           |            |
| Huddersfield | Huddersfield Royal Infirmary | Jane Hook               |            |
| Huddersfield | Huddersfield Royal Infirmary | Uschi Hofmann           | PI         |
| Huddersfield | Huddersfield Royal Infirmary | Hannah Riley            |            |
| Huddersfield | Huddersfield Royal Infirmary | Sanya Anjum             |            |
| Huddersfield | Huddersfield Royal Infirmary | Sarah Hanley            |            |
| Huddersfield | Huddersfield Royal Infirmary | Adam Mawer              | Pharmacist |
| Huddersfield | Huddersfield Royal Infirmary | Deivasikamani Ramanujam | Co-I       |
| Huddersfield | Huddersfield Royal Infirmary | Mohammad Irfan Alam     |            |



|              |                                |                      |            |
|--------------|--------------------------------|----------------------|------------|
| Huddersfield | Huddersfield Royal Infirmary   | Nicolas Bryan        | Co-I       |
| Huddersfield | Huddersfield Royal Infirmary   | Hayley Webster       | Pharmacist |
| Huddersfield | Huddersfield Royal Infirmary   | Julie Millward       |            |
| Huddersfield | Huddersfield Royal Infirmary   | Kathryn Smith        |            |
| Huddersfield | Huddersfield Royal Infirmary   | Kully Sandhu         |            |
| Huddersfield | Huddersfield Royal Infirmary   | Lear Matapure        |            |
| Huddersfield | Huddersfield Royal Infirmary   | Lee-Ann Bayo         |            |
| Huddersfield | Huddersfield Royal Infirmary   | Melanie Quesne       |            |
| Huddersfield | Huddersfield Royal Infirmary   | Nicky Daker          |            |
| Huddersfield | Huddersfield Royal Infirmary   | Hayley Inman         |            |
| Huddersfield | Huddersfield Royal Infirmary   | Lisa Shaw            |            |
| Huddersfield | Huddersfield Royal Infirmary   | Miranda Usher        |            |
| Huddersfield | Huddersfield Royal Infirmary   | Belinda McLean       |            |
| Huddersfield | Huddersfield Royal Infirmary   | Diane Kelly          |            |
| Huddersfield | Huddersfield Royal Infirmary   | Karen Bicknell       |            |
| Huddersfield | Huddersfield Royal Infirmary   | Katherine Tighe      |            |
| Huddersfield | Huddersfield Royal Infirmary   | Lindsay Greenhalgh   | Pharmacist |
| Huddersfield | Huddersfield Royal Infirmary   | Lucy Jones           | Co-I       |
| Huddersfield | Huddersfield Royal Infirmary   | Monica Narasimham    |            |
| Huddersfield | Huddersfield Royal Infirmary   | Naledi Mzwimbi       |            |
| Huddersfield | Huddersfield Royal Infirmary   | Paula Gomes          | Pharmacist |
| Huddersfield | Huddersfield Royal Infirmary   | Christine Turner     |            |
| Huddersfield | Huddersfield Royal Infirmary   | Denise Hancock       |            |
| Huddersfield | Huddersfield Royal Infirmary   | Lisa Gledhill        |            |
| Huddersfield | Huddersfield Royal Infirmary   | Mandy Madigan        |            |
| Huddersfield | Huddersfield Royal Infirmary   | Rachel Parker        |            |
| Huddersfield | Huddersfield Royal Infirmary   | Sharon Woolley       |            |
| Huddersfield | Huddersfield Royal Infirmary   | Stacey Freeth        |            |
| Huddersfield | Huddersfield Royal Infirmary   | Tracy Wood           |            |
| Huddersfield | Huddersfield Royal Infirmary   | Ibrar Hussain        |            |
| Hull         | Princess Royal Hospital (Hull) | Christopher Hamilton |            |
| Hull         | Princess Royal Hospital (Hull) | Robert Dealey        | PI         |
| Hull         | Princess Royal Hospital (Hull) | Emma Bertram         | Pharmacist |
| Hull         | Princess Royal Hospital (Hull) | Sarah Moffat         |            |

|           |                                |                          |            |
|-----------|--------------------------------|--------------------------|------------|
| Hull      | Princess Royal Hospital (Hull) | Suzy Bunton              |            |
| Hull      | Princess Royal Hospital (Hull) | Claire Levesley          |            |
| Hull      | Princess Royal Hospital (Hull) | Linda Hoggarth           |            |
| Ilford    | King George Hospital           | Ramachandran Subramaniam |            |
| Ilford    | King George Hospital           | Neil Fisher              |            |
| Inverness | Raigmore Hospital              | Alison Nicholls          |            |
| Inverness | Raigmore Hospital              | Anne Marie Pollock       |            |
| Inverness | Raigmore Hospital              | Charles Kodikara         |            |
| Inverness | Raigmore Hospital              | Feng Yi Soh              |            |
| Inverness | Raigmore Hospital              | Marion Paterson          |            |
| Inverness | Raigmore Hospital              | Neil McPhail             | PI         |
| Inverness | Raigmore Hospital              | Sin Ting (Amy) Chan      | Co-I       |
| Inverness | Raigmore Hospital              | Aristoula Papakostidi    |            |
| Inverness | Raigmore Hospital              | Azmat Sadozye            |            |
| Inverness | Raigmore Hospital              | Carol Macgregor          |            |
| Inverness | Raigmore Hospital              | David Whillis            |            |
| Inverness | Raigmore Hospital              | Kay Kelly                |            |
| Inverness | Raigmore Hospital              | Martin Russell           |            |
| Inverness | Raigmore Hospital              | Steve Nicholson          |            |
| Inverness | Raigmore Hospital              | Denise Campbell          |            |
| Inverness | Raigmore Hospital              | Graeme Jervis            | Pharmacist |
| Inverness | Raigmore Hospital              | Ian Shread               |            |
| Inverness | Raigmore Hospital              | Michael Loynd            |            |
| Inverness | Raigmore Hospital              | Jude Madeleine           | Pharmacist |
| Inverness | Raigmore Hospital              | Sean Neville             |            |
| Inverness | Raigmore Hospital              | Sudhir Borgaonkar        |            |
| Inverness | Raigmore Hospital              | Anglise Addison          |            |
| Inverness | Raigmore Hospital              | Karina McQuiston         |            |
| Inverness | Raigmore Hospital              | Mary McKenzie            | Pharmacist |
| Inverness | Raigmore Hospital              | Melanie McIlroy          |            |
| Inverness | Raigmore Hospital              | Rachel Mackay            |            |
| Inverness | Raigmore Hospital              | Una Taylor               | Pharmacist |
| Inverness | Raigmore Hospital              | Alison Macdonald         |            |
| Inverness | Raigmore Hospital              | Angela Macgregor         |            |

|           |                   |                           |            |
|-----------|-------------------|---------------------------|------------|
| Inverness | Raigmore Hospital | Florence Anderson         |            |
| Inverness | Raigmore Hospital | Georgina Simpson          |            |
| Inverness | Raigmore Hospital | Jane Campbell             |            |
| Inverness | Raigmore Hospital | Sandra Brown              |            |
| Inverness | Raigmore Hospital | Seonaid Arnott            |            |
| Inverness | Raigmore Hospital | Anna Robertson            |            |
| Inverness | Raigmore Hospital | Anna Skene                |            |
| Inverness | Raigmore Hospital | Jane Sinclair             |            |
| Inverness | Raigmore Hospital | Joan Stewart              |            |
| Inverness | Raigmore Hospital | Karen Callum              |            |
| Inverness | Raigmore Hospital | Laura Maclennan           |            |
| Inverness | Raigmore Hospital | Margaret Chisholm         |            |
| Inverness | Raigmore Hospital | Melissa Lynch             |            |
| Inverness | Raigmore Hospital | Zoe Urquhart              | Pharmacist |
| Inverness | Raigmore Hospital | Audrey Campbell           |            |
| Inverness | Raigmore Hospital | Catriona Morrison         |            |
| Inverness | Raigmore Hospital | Fiona Campbell            |            |
| Inverness | Raigmore Hospital | Glenda Sinclair           |            |
| Inverness | Raigmore Hospital | Susan Bain                |            |
| Ipswich   | Ipswich Hospital  | Deborah Abrams            |            |
| Ipswich   | Ipswich Hospital  | Kevin Redshaw             |            |
| Ipswich   | Ipswich Hospital  | Sam Obay                  |            |
| Ipswich   | Ipswich Hospital  | William Ine               | Co-I       |
| Ipswich   | Ipswich Hospital  | Adiba Hoodbhoy            |            |
| Ipswich   | Ipswich Hospital  | Christopher Scrase        |            |
| Ipswich   | Ipswich Hospital  | Jennifer Collins          |            |
| Ipswich   | Ipswich Hospital  | Ramachandran Venkitaraman | PI         |
| Ipswich   | Ipswich Hospital  | Sarah Treece              |            |
| Ipswich   | Ipswich Hospital  | Sheen Cherian             |            |
| Ipswich   | Ipswich Hospital  | TJ Podd                   | Co-I       |
| Ipswich   | Ipswich Hospital  | Debbie Austin             |            |
| Ipswich   | Ipswich Hospital  | Andy Dann                 |            |
| Ipswich   | Ipswich Hospital  | Chris Rose                |            |
| Ipswich   | Ipswich Hospital  | Joe Wells                 |            |

|               |                              |                           |            |
|---------------|------------------------------|---------------------------|------------|
| Ipswich       | Ipswich Hospital             | Matt Mendoza              |            |
| Ipswich       | Ipswich Hospital             | Gautam Banerjee           |            |
| Ipswich       | Ipswich Hospital             | Ian Floodgate             | Pharmacist |
| Ipswich       | Ipswich Hospital             | John Parry                |            |
| Ipswich       | Ipswich Hospital             | Mohsen Habib              |            |
| Ipswich       | Ipswich Hospital             | Paul Ridley               |            |
| Ipswich       | Ipswich Hospital             | Peter Donaldson           |            |
| Ipswich       | Ipswich Hospital             | Robert Brierly            | PI         |
| Ipswich       | Ipswich Hospital             | Charlotte Etheridge       |            |
| Ipswich       | Ipswich Hospital             | Karen Bass                |            |
| Ipswich       | Ipswich Hospital             | Kerry Howlett (nee Brown) | Pharmacist |
| Ipswich       | Ipswich Hospital             | Mandy Riley (nee Evans)   |            |
| Ipswich       | Ipswich Hospital             | Susan Teh (Seok San)      |            |
| Ipswich       | Ipswich Hospital             | Sonia Kerridge            |            |
| Ipswich       | Ipswich Hospital             | Susan Upson               |            |
| Ipswich       | Ipswich Hospital             | Yvonne Tricker            |            |
| Ipswich       | Ipswich Hospital             | Harriet Williambi         |            |
| Ipswich       | Ipswich Hospital             | Jo Woor                   |            |
| Ipswich       | Ipswich Hospital             | Julie Simpson             |            |
| Ipswich       | Ipswich Hospital             | Angharad Williams         |            |
| Ipswich       | Ipswich Hospital             | Julie Spurgeon            |            |
| Ipswich       | Ipswich Hospital             | Natalie Lloyd             |            |
| Isle of Wight | St Mary's Hospital (Newport) | Elizabeth Harrison        |            |
| Keighley      | Airedale General Hospital    | Ann Henry                 |            |
| Keighley      | Airedale General Hospital    | Charlotte Richardson      |            |
| Keighley      | Airedale General Hospital    | Clara Sentamans           |            |
| Keighley      | Airedale General Hospital    | Nathalie Casanova         |            |
| Keighley      | Airedale General Hospital    | Simon Brown               | PI         |
| Keighley      | Airedale General Hospital    | Sohail Mughal             | Co-I       |
| Keighley      | Airedale General Hospital    | Dan Lee                   |            |
| Keighley      | Airedale General Hospital    | Ganesan Jeyasangar        |            |
| Keighley      | Airedale General Hospital    | Michael Crawford          |            |
| Keighley      | Airedale General Hospital    | Sue Cheeseman             |            |
| Keighley      | Airedale General Hospital    | Amy Pendrill              |            |

|               |                                |                   |            |
|---------------|--------------------------------|-------------------|------------|
| Keighley      | Airedale General Hospital      | Andrew Gash       |            |
| Keighley      | Airedale General Hospital      | Joseph Quinn      |            |
| Keighley      | Airedale General Hospital      | Satti Saggu       |            |
| Keighley      | Airedale General Hospital      | Carl Booth        | Pharmacist |
| Keighley      | Airedale General Hospital      | Anita Ratcliffe   |            |
| Keighley      | Airedale General Hospital      | Josie Snell       |            |
| Keighley      | Airedale General Hospital      | Lisa Bullough     |            |
| Keighley      | Airedale General Hospital      | Liz Shenton       |            |
| Keighley      | Airedale General Hospital      | Pip Hill          |            |
| Keighley      | Airedale General Hospital      | Rachel Kennedy    |            |
| Keighley      | Airedale General Hospital      | Sharron Parkinson |            |
| Keighley      | Airedale General Hospital      | Alison Shaw       |            |
| Keighley      | Airedale General Hospital      | Gillian Darnbrook | Pharmacist |
| Keighley      | Airedale General Hospital      | Jasmine Hartley   |            |
| Keighley      | Airedale General Hospital      | Alison Swindells  | Pharmacist |
| Keighley      | Airedale General Hospital      | Hayley Bates      |            |
| Keighley      | Airedale General Hospital      | Louise Binns      |            |
| Keighley      | Airedale General Hospital      | Ruth Johnson      |            |
| Keighley      | Airedale General Hospital      | Fiona Farquhar    |            |
| Keighley      | Airedale General Hospital      | Helen Henson      |            |
| Keighley      | Airedale General Hospital      | Judy McAlister    |            |
| Keighley      | Airedale General Hospital      | Maxine Briggs     |            |
| Keighley      | Airedale General Hospital      | Mandy Swanepoel   |            |
| Kidderminster | Kidderminster General Hospital | Ayyaz Munawar     | Co-I       |
| Kidderminster | Kidderminster General Hospital | Kirsty Clarke     | Co-I       |
| Kidderminster | Kidderminster General Hospital | M Habib Khan      |            |
| Kidderminster | Kidderminster General Hospital | Shaikh Rana       | Co-I       |
| Kidderminster | Kidderminster General Hospital | Lisa Capaldi      | PI         |
| Kidderminster | Kidderminster General Hospital | Mark Churn        |            |
| Kidderminster | Kidderminster General Hospital | Paul Flinders     | Co-I       |
| Kidderminster | Kidderminster General Hospital | Hugh Morrow       |            |
| Kidderminster | Kidderminster General Hospital | Monica Gauntlett  | Pharmacist |
| Kidderminster | Kidderminster General Hospital | Veronica Rowlands |            |
| Kidderminster | Kidderminster General Hospital | Emma Marshall     |            |

|               |                                |                               |            |
|---------------|--------------------------------|-------------------------------|------------|
| Kidderminster | Kidderminster General Hospital | Hayley Hodson                 |            |
| Kidderminster | Kidderminster General Hospital | Helen Tranter                 |            |
| Kidderminster | Kidderminster General Hospital | Julie Wollaston               |            |
| Kidderminster | Kidderminster General Hospital | Kate Field                    |            |
| Kidderminster | Kidderminster General Hospital | Patricia Rimell               |            |
| Kidderminster | Kidderminster General Hospital | Sarah Moss                    |            |
| Kidderminster | Kidderminster General Hospital | Sally Stringer (pr. Davis)    |            |
| Kidderminster | Kidderminster General Hospital | Alison Rosoman                |            |
| Kidderminster | Kidderminster General Hospital | Jayne Tyler                   |            |
| Kidderminster | Kidderminster General Hospital | Linda Higgins                 |            |
| Kilmarnock    | Ayr Hospital                   | Ricky Hunter                  | Pharmacist |
| Kilmarnock    | Ayr Hospital                   | Jennifer Keith                |            |
| Kilmarnock    | Crosshouse Hospital            | Margaret McKernan             |            |
| Kilmarnock    | Ayr Hospital                   | Maureen Templeton             |            |
| Lancaster     | Royal Lancaster Infirmary      | Sophie Raby                   |            |
| Larbert       | Forth Valley Royal Hospital    | Adam Peters                   |            |
| Larbert       | Forth Valley Royal Hospital    | Amy Martin                    |            |
| Larbert       | Forth Valley Royal Hospital    | Caroline Lowrie               |            |
| Larbert       | Forth Valley Royal Hospital    | John Martin Russell           |            |
| Larbert       | Forth Valley Royal Hospital    | Saurabh Borgaonkar            |            |
| Larbert       | Forth Valley Royal Hospital    | Stephen McKay                 |            |
| Larbert       | Forth Valley Royal Hospital    | Carolynn Lamb                 |            |
| Larbert       | Forth Valley Royal Hospital    | Nadja Melquiot                |            |
| Larbert       | Forth Valley Royal Hospital    | Norma Sidek                   | PI         |
| Larbert       | Forth Valley Royal Hospital    | Eilidh Henderson              |            |
| Larbert       | Forth Valley Royal Hospital    | Kirsty Young                  |            |
| Larbert       | Forth Valley Royal Hospital    | Mhari TTaylor                 |            |
| Larbert       | Forth Valley Royal Hospital    | Stephanie Brogan (nee Roddie) |            |
| Larbert       | Forth Valley Royal Hospital    | Seamus Teahan                 |            |
| Larbert       | Forth Valley Royal Hospital    | Anna Hamilton                 |            |
| Larbert       | Forth Valley Royal Hospital    | Anne Todd                     |            |
| Larbert       | Forth Valley Royal Hospital    | Joanne Robinson               | Pharmacist |
| Larbert       | Forth Valley Royal Hospital    | Lesley Symon                  |            |
| Larbert       | Forth Valley Royal Hospital    | Patricia Turner               |            |

|          |                                                 |                         |    |
|----------|-------------------------------------------------|-------------------------|----|
| Larbert  | Forth Valley Royal Hospital                     | Lynn Prentice           |    |
| Larbert  | Forth Valley Royal Hospital                     | Maureen Hamill          |    |
| Larbert  | Forth Valley Royal Hospital                     | Sally Young             |    |
| Larbert  | Forth Valley Royal Hospital                     | Alison Yule             |    |
| Larbert  | Beatson West of Scotland Cancer Centre          | Maureen Hamill          |    |
| Lausanne | Centre Hospitalier Universitaire Vaudois (CHUV) | Geert Van Driessche     |    |
| Lausanne | Centre Hospitalier Universitaire Vaudois (CHUV) | Benangene Midez         |    |
| Lausanne | Centre Hospitalier Universitaire Vaudois (CHUV) | Angela Orcurto          |    |
| Lausanne | Centre Hospitalier Universitaire Vaudois (CHUV) | Antonella Diciolla      |    |
| Lausanne | Centre Hospitalier Universitaire Vaudois (CHUV) | Claire Perrinjaquet     |    |
| Lausanne | Centre Hospitalier Universitaire Vaudois (CHUV) | Dominik Berthold        | PI |
| Lausanne | Centre Hospitalier Universitaire Vaudois (CHUV) | Louis Parisod           |    |
| Lausanne | Centre Hospitalier Universitaire Vaudois (CHUV) | Sofiya Latifyan         |    |
| Lausanne | Centre Hospitalier Universitaire Vaudois (CHUV) | Fernanda Herrera        |    |
| Lausanne | Centre Hospitalier Universitaire Vaudois (CHUV) | Akram Farhat            |    |
| Lausanne | Centre Hospitalier Universitaire Vaudois (CHUV) | Yohan Boillat           |    |
| Lausanne | Centre Hospitalier Universitaire Vaudois (CHUV) | Alexandra Rideau        |    |
| Lausanne | Centre Hospitalier Universitaire Vaudois (CHUV) | Fabrice Lalubin         |    |
| Lausanne | Centre Hospitalier Universitaire Vaudois (CHUV) | Hans-peter Roth         |    |
| Lausanne | Centre Hospitalier Universitaire Vaudois (CHUV) | Jean-Philippe Zurcher   |    |
| Lausanne | Centre Hospitalier Universitaire Vaudois (CHUV) | Tewfik Abedlaziz        |    |
| Lausanne | Centre Hospitalier Universitaire Vaudois (CHUV) | Kaniana Ntanga Muambayi |    |
| Lausanne | Centre Hospitalier Universitaire Vaudois (CHUV) | Sandra Toffanin         |    |
| Lausanne | Centre Hospitalier Universitaire Vaudois (CHUV) | Agnes Hiou Feige        |    |
| Lausanne | Centre Hospitalier Universitaire Vaudois (CHUV) | Alice Abdallah          |    |
| Lausanne | Centre Hospitalier Universitaire Vaudois (CHUV) | Aline Voidey            |    |
| Lausanne | Centre Hospitalier Universitaire Vaudois (CHUV) | Anabela Costa           |    |
| Lausanne | Centre Hospitalier Universitaire Vaudois (CHUV) | Anna-Sophia Briod       |    |
| Lausanne | Centre Hospitalier Universitaire Vaudois (CHUV) | Carmen Castagna         |    |
| Lausanne | Centre Hospitalier Universitaire Vaudois (CHUV) | Catherine Bender        |    |
| Lausanne | Centre Hospitalier Universitaire Vaudois (CHUV) | Celine Yerly            |    |
| Lausanne | Centre Hospitalier Universitaire Vaudois (CHUV) | Cosette Schuler         |    |
| Lausanne | Centre Hospitalier Universitaire Vaudois (CHUV) | Cynthia Leclerc         |    |
| Lausanne | Centre Hospitalier Universitaire Vaudois (CHUV) | Eloise Kremer           |    |

|          |                                                 |                      |      |
|----------|-------------------------------------------------|----------------------|------|
| Lausanne | Centre Hospitalier Universitaire Vaudois (CHUV) | Floriane Bouilly     |      |
| Lausanne | Centre Hospitalier Universitaire Vaudois (CHUV) | Margaret McLauchlan  |      |
| Lausanne | Centre Hospitalier Universitaire Vaudois (CHUV) | May-Lucie Meyer      | Co-I |
| Lausanne | Centre Hospitalier Universitaire Vaudois (CHUV) | Nathalie Divorne     |      |
| Lausanne | Centre Hospitalier Universitaire Vaudois (CHUV) | Nicole James Faresse |      |
| Lausanne | Centre Hospitalier Universitaire Vaudois (CHUV) | Norlene Silva        |      |
| Lausanne | Centre Hospitalier Universitaire Vaudois (CHUV) | Rebecca Oppenheim    |      |
| Lausanne | Centre Hospitalier Universitaire Vaudois (CHUV) | Sophie Voegtlin      |      |
| Lausanne | Centre Hospitalier Universitaire Vaudois (CHUV) | Sylvie Haudidier     |      |
| Lausanne | Centre Hospitalier Universitaire Vaudois (CHUV) | Veronica Aedo        |      |
| Lausanne | Centre Hospitalier Universitaire Vaudois (CHUV) | Patrice Jichlinski   |      |
| Lausanne | Centre Hospitalier Universitaire Vaudois (CHUV) | Galaad Bernard       |      |
| Lausanne | Centre Hospitalier Universitaire Vaudois (CHUV) | Marc Schnety         |      |
| Lausanne | Centre Hospitalier Universitaire Vaudois (CHUV) | Sabine Galland       |      |
| Lausanne | Centre Hospitalier Universitaire Vaudois (CHUV) | Sophia Murel         |      |
| Leeds    | St James University Hospital (Leeds)            | Ann Henry            |      |
| Leeds    | St James University Hospital (Leeds)            | Ann Henry            |      |
| Leeds    | St James University Hospital (Leeds)            | Christopher Williams |      |
| Leeds    | St James University Hospital (Leeds)            | Christy Ralph        |      |
| Leeds    | Bradford Royal Infirmary                        | Ee Siang Choong      |      |
| Leeds    | Bradford Royal Infirmary                        | Emma Dugdale         |      |
| Leeds    | St James University Hospital (Leeds)            | Ian Boon             |      |
| Leeds    | St James University Hospital (Leeds)            | Joseph Joji          |      |
| Leeds    | Airedale General Hospital                       | Katy Clarke          |      |
| Leeds    | Bradford Royal Infirmary                        | Katy Clarke          |      |
| Leeds    | Bradford Royal Infirmary                        | Michael Flatley      | Co-I |
| Leeds    | St James University Hospital (Leeds)            | Naveen Vasudev       | Co-I |
| Leeds    | Cookridge Hospital                              | Anne Kiltie          |      |
| Leeds    | St James University Hospital (Leeds)            | Anne Kiltie          |      |
| Leeds    | St James University Hospital (Leeds)            | Carmel Loughrey      |      |
| Leeds    | St James University Hospital (Leeds)            | David Bottomley      |      |
| Leeds    | St James University Hospital (Leeds)            | Hima Bindu Musunuru  |      |
| Leeds    | St James University Hospital (Leeds)            | Janet Brown          |      |
| Leeds    | St James University Hospital (Leeds)            | John Chester         |      |



|       |                                      |                         |      |
|-------|--------------------------------------|-------------------------|------|
| Leeds | St James University Hospital (Leeds) | Kevin Franks            |      |
| Leeds | St James University Hospital (Leeds) | Krishna Shastry         |      |
| Leeds | Bradford Royal Infirmary             | Lisa Owen               | Co-I |
| Leeds | St James University Hospital (Leeds) | Luis Daverede           |      |
| Leeds | St James University Hospital (Leeds) | Richard Khafagy         |      |
| Leeds | St James University Hospital (Leeds) | Satinder Jagdev         |      |
| Leeds | St James University Hospital (Leeds) | Claire Posnett          |      |
| Leeds | St James University Hospital (Leeds) | Hannah Roberts          |      |
| Leeds | St James University Hospital (Leeds) | Javeria Akhtar          |      |
| Leeds | St James University Hospital (Leeds) | Jodene Hill             |      |
| Leeds | St James University Hospital (Leeds) | Judith Evans            |      |
| Leeds | St James University Hospital (Leeds) | Svetoslava Doshmanonska |      |
| Leeds | St James University Hospital (Leeds) | Liz Hudson              |      |
| Leeds | St James University Hospital (Leeds) | Christopher Main        |      |
| Leeds | St James University Hospital (Leeds) | Ruiyang Yan             |      |
| Leeds | St James University Hospital (Leeds) | Sanjeev Kotwal          |      |
| Leeds | St James University Hospital (Leeds) | William Cross           | PI   |
| Leeds | Leeds General Infirmary              | Adrian Joyce            |      |
| Leeds | St James University Hospital (Leeds) | Adrian Joyce            |      |
| Leeds | St James University Hospital (Leeds) | Alan Paul               |      |
| Leeds | St James University Hospital (Leeds) | James Cavanagh          |      |
| Leeds | St James University Hospital (Leeds) | Peter Whelan            | PI   |
| Leeds | St James University Hospital (Leeds) | Rafal Turo              |      |
| Leeds | St James University Hospital (Leeds) | Sam Lotfi               |      |
| Leeds | St James University Hospital (Leeds) | Stephen Prescott        |      |
| Leeds | St James University Hospital (Leeds) | Sunjay Jain             |      |
| Leeds | St James University Hospital (Leeds) | Catherine Parbutt       |      |
| Leeds | St James University Hospital (Leeds) | Jude Clarke             |      |
| Leeds | St James University Hospital (Leeds) | Lorraine Wiseman        |      |
| Leeds | St James University Hospital (Leeds) | Polapo Ajayi            |      |
| Leeds | St James University Hospital (Leeds) | Angela Morgan           |      |
| Leeds | St James University Hospital (Leeds) | Anne Crossley           |      |
| Leeds | St James University Hospital (Leeds) | Dolapo Ajayi            |      |
| Leeds | St James University Hospital (Leeds) | Hannah Wigginton        |      |

|         |                                      |                            |            |
|---------|--------------------------------------|----------------------------|------------|
| Leeds   | St James University Hospital (Leeds) | Lorraine Wiseman           |            |
| Leeds   | Leeds General Infirmary              | Caroline Bedford           |            |
| Leeds   | St James University Hospital (Leeds) | Caroline Bedford           | Pharmacist |
| Leeds   | St James University Hospital (Leeds) | Charlotte Pool             |            |
| Leeds   | St James University Hospital (Leeds) | Emily Davies               |            |
| Leeds   | St James University Hospital (Leeds) | Emma Lundy                 | Pharmacist |
| Leeds   | St James University Hospital (Leeds) | Gemma Austin (nee Glover)  |            |
| Leeds   | St James University Hospital (Leeds) | Helen Payne                |            |
| Leeds   | St James University Hospital (Leeds) | Jade McCann                |            |
| Leeds   | St James University Hospital (Leeds) | Judith Chapman             |            |
| Leeds   | St James University Hospital (Leeds) | Maria Hall                 |            |
| Leeds   | St James University Hospital (Leeds) | Mercy Kaiga                |            |
| Leeds   | St James University Hospital (Leeds) | Sue Rodwell                |            |
| Leeds   | St James University Hospital (Leeds) | Sue Sibson                 |            |
| Leeds   | Cookridge Hospital                   | Richard Kaplan             |            |
| Leeds   | St James University Hospital (Leeds) | Richard Kaplan             |            |
| Liestal | Kantonsspital Liestal                | Eloise Kremer              |            |
| Liestal | Kantonsspital Liestal                | Simone Marini              |            |
| Liestal | Kantonsspital Liestal                | Vanessa Fuhrer             |            |
| Liestal | Kantonsspital Liestal                | Andreas Lohri              |            |
| Lincoln | Lincoln County Hospital              | Ana Fernandez-Ots          | Co-I       |
| Lincoln | Lincoln County Hospital              | Andrew Sloan               |            |
| Lincoln | Lincoln County Hospital              | Christian Arias            |            |
| Lincoln | Lincoln County Hospital              | David Ballesteros-Quintail |            |
| Lincoln | Lincoln County Hospital              | Elena Macleod              |            |
| Lincoln | Lincoln County Hospital              | Sindhu Ramarwothy          | Co-I       |
| Lincoln | Lincoln County Hospital              | Yogesh Nishchal            |            |
| Lincoln | Lincoln County Hospital              | Alfredo Addeo              |            |
| Lincoln | Lincoln County Hospital              | Karin Baria                |            |
| Lincoln | Lincoln County Hospital              | Miguel Panades             | PI         |
| Lincoln | Lincoln County Hospital              | Prantik Das                | Co-I       |
| Lincoln | Lincoln County Hospital              | Thiagarajan Sreenivasan    | PI         |
| Lincoln | Pilgrim Hospital                     | Thiagarajan Sreenivasan    | PI         |
| Lincoln | Lincoln County Hospital              | Gunjan Phalod              |            |

|           |                                     |                   |            |
|-----------|-------------------------------------|-------------------|------------|
| Lincoln   | Lincoln County Hospital             | Andrew Judd       |            |
| Lincoln   | Lincoln County Hospital             | Ray McDermott     |            |
| Lincoln   | Lincoln County Hospital             | Stephen Audu      | Pharmacist |
| Lincoln   | Lincoln County Hospital             | Simon Archer      |            |
| Lincoln   | Lincoln County Hospital             | Alyson Wilson     |            |
| Lincoln   | Lincoln County Hospital             | Diane Carey       |            |
| Lincoln   | Lincoln County Hospital             | Kathryn Pearson   |            |
| Lincoln   | Lincoln County Hospital             | Kerri Johnson     |            |
| Lincoln   | Lincoln County Hospital             | Laura Walsh       |            |
| Lincoln   | Lincoln County Hospital             | Maryanne Okubanjo |            |
| Lincoln   | Lincoln County Hospital             | Olesya Francis    |            |
| Lincoln   | Lincoln County Hospital             | Caroline Taylor   | Pharmacist |
| Lincoln   | Lincoln County Hospital             | Suzanne Archer    |            |
| Lincoln   | Lincoln County Hospital             | Giuseppe Banna    |            |
| Lincoln   | Lincoln County Hospital             | Helen Carolan     |            |
| Lincoln   | Lincoln County Hospital             | Janet Tomlinson   |            |
| Lincoln   | Lincoln County Hospital             | Jayne Borley      | Pharmacist |
| Lincoln   | Lincoln County Hospital             | Jenny Salmon      |            |
| Lincoln   | Lincoln County Hospital             | Kathryn Hoare     |            |
| Lincoln   | Lincoln County Hospital             | Rebecca Spencer   |            |
| Lincoln   | Lincoln County Hospital             | Rhiannan Pegg     |            |
| Lincoln   | Lincoln County Hospital             | Sarah Bell        | Pharmacist |
| Lincoln   | Lincoln County Hospital             | Sarah Coombs      |            |
| Lincoln   | Lincoln County Hospital             | Stephanie Barker  |            |
| Lincoln   | Lincoln County Hospital             | Annette Hilldrith |            |
| Lincoln   | Lincoln County Hospital             | Carol Lockwood    |            |
| Lincoln   | Lincoln County Hospital             | Rachel Newton     |            |
| Lincoln   | Lincoln County Hospital             | Susie Butler      |            |
| Liverpool | Royal Liverpool University Hospital | Jasima Latif      |            |
| Liverpool | Royal Liverpool University Hospital | Chinnamani Eswar  | Co-I       |
| Liverpool | University Hospital Aintree         | Paul Hill         |            |
| Liverpool | Royal Liverpool University Hospital | Peter Robson      |            |
| Liverpool | University Hospital Aintree         | Peter Robson      | PI         |
| Liverpool | Royal Liverpool University Hospital | Zafar Malik       | PI         |

|           |                                     |                           |            |
|-----------|-------------------------------------|---------------------------|------------|
| Liverpool | University Hospital Aintree         | Lucy Berresford           |            |
| Liverpool | University Hospital Aintree         | Rachael Fergusson         |            |
| Liverpool | Royal Liverpool University Hospital | Katy Treherne             |            |
| Liverpool | Royal Liverpool University Hospital | Kevin McDonald            |            |
| Liverpool | Royal Liverpool University Hospital | Paul Griffiths            |            |
| Liverpool | Royal Liverpool University Hospital | Philip Reynolds           |            |
| Liverpool | University Hospital Aintree         | Wesley Artist             |            |
| Liverpool | University Hospital Aintree         | Lorraine Lancaster        |            |
| Liverpool | Royal Liverpool University Hospital | Nidhi Sibal               |            |
| Liverpool | Royal Liverpool University Hospital | Sharon Dunn (nee Johnson) |            |
| Liverpool | Royal Liverpool University Hospital | Sue Green                 |            |
| Liverpool | Royal Liverpool University Hospital | Sandra Robinson           |            |
| Liverpool | University Hospital Aintree         | Sandra Robinson           | Pharmacist |
| Liverpool | Royal Liverpool University Hospital | Nicola Bermingham         |            |
| Liverpool | Royal Liverpool University Hospital | Pembe Yesildag            |            |
| Liverpool | Royal Liverpool University Hospital | Dawn Porter               |            |
| Liverpool | University Hospital Aintree         | Haley McCulloch           |            |
| Liverpool | Royal Liverpool University Hospital | Julie Griffiths           |            |
| Liverpool | University Hospital Aintree         | Julie Griffiths           |            |
| Liverpool | University Hospital Aintree         | Leigh Pauls               |            |
| Liverpool | Royal Liverpool University Hospital | Lisa Dobson (nee Child)   |            |
| Liverpool | University Hospital Aintree         | Lisa Dobson (nee Child)   | Pharmacist |
| Liverpool | Royal Liverpool University Hospital | Lizzie Dale               |            |
| Liverpool | Royal Liverpool University Hospital | Pauline Pilkington        |            |
| London    | Royal Marsden Hospital (London)     | Adnan Akhtar              |            |
| London    | Guy's Hospital (London)             | Ajay Aggarwal             |            |
| London    | University College Hospital         | Anita Mitra               |            |
| London    | Royal Marsden Hospital (London)     | Anna Wilkins              |            |
| London    | University College Hospital         | Anuradha Jayaram          |            |
| London    | University College Hospital         | Bianca Tryillo            |            |
| London    | University College Hospital         | Bihani Kularatne          |            |
| London    | Guy's Hospital (London)             | Caterina Aversa           |            |
| London    | St Bartholomews Hospital (London)   | Cavitha Vivekananthan     |            |
| London    | Guy's Hospital (London)             | Chara Stavraka            | Co-I       |

|        |                                     |                       |      |
|--------|-------------------------------------|-----------------------|------|
| London | Guy's Hospital (London)             | Charalampos Gousis    |      |
| London | Guy's Hospital (London)             | Charleen Chan Wah Hak |      |
| London | Guy's Hospital (London)             | Clare Gilson          |      |
| London | Guy's Hospital (London)             | Deborah Enting        |      |
| London | Guy's Hospital (London)             | Delali Adjogatse      |      |
| London | University College Hospital         | Dieo Ottaviani        |      |
| London | Guy's Hospital (London)             | Eirini Tsotra         |      |
| London | Guy's Hospital (London)             | Eleni Josephides      |      |
| London | Guy's Hospital (London)             | Elias Pintus          |      |
| London | Queen Elizabeth Hospital (Woolwich) | Elias Pintus          | Co-I |
| London | Royal Marsden Hospital (London)     | Emily Durie           |      |
| London | Royal Free Hospital                 | Emily Scott           | Co-I |
| London | Royal Marsden Hospital (London)     | Ewan Chapman          | Co-I |
| London | St Georges Hospital (London)        | Gelareh Eslamian      |      |
| London | University College Hospital         | Gianmarco Leone       |      |
| London | Royal Free Hospital                 | Grant Stewart         | Co-I |
| London | Guy's Hospital (London)             | Hannah Rush           |      |
| London | Royal Marsden Hospital (London)     | James Lowe            |      |
| London | Royal Marsden Hospital (London)     | Jana McHugh           |      |
| London | Guy's Hospital (London)             | Jennifer Turner       |      |
| London | Royal Marsden Hospital (London)     | Kallol Bhadra         |      |
| London | Guy's Hospital (London)             | Kamarul Zaki          |      |
| London | St Bartholomews Hospital (London)   | Karen Tipples         | PI   |
| London | Royal Free Hospital                 | Kate Smith            | Co-I |
| London | Guy's Hospital (London)             | Kiruthikah Thillai    |      |
| London | St Georges Hospital (London)        | Laura Camburn         | Co-I |
| London | Royal Marsden Hospital (London)     | Leron Okonta          |      |
| London | Royal Free Hospital                 | Magdalena Kubiak      | Co-I |
| London | University College Hospital         | Maise Albakir         |      |
| London | Guy's Hospital (London)             | Mark Voskoboynik      |      |
| London | Guy's Hospital (London)             | Matthaius Kapiris     |      |
| London | St Georges Hospital (London)        | Mohammed Mahgoub      |      |
| London | Guy's Hospital (London)             | Muhammad Khan         |      |
| London | Royal Marsden Hospital (London)     | Nicholas Vanas        |      |

|        |                                     |                         |      |
|--------|-------------------------------------|-------------------------|------|
| London | Royal Free Hospital                 | Nicola Rosenfelder      | Co-I |
| London | Guy's Hospital (London)             | Nikolaos Tsoukalas      |      |
| London | Charing Cross Hospital              | Paul Kabuubi            |      |
| London | Guy's Hospital (London)             | Rosalind Kieran         |      |
| London | St Georges Hospital (London)        | Roxane Mather           |      |
| London | Royal Free Hospital                 | Ruochen Li              |      |
| London | Guy's Hospital (London)             | Sabeeh Butt             |      |
| London | Guy's Hospital (London)             | Sarah Howiett           | Co-I |
| London | Royal Free Hospital                 | Sarah Needleman         | PI   |
| London | Charing Cross Hospital              | Stephen Mangar          | Co-I |
| London | Hammersmith Hospital                | Stephen Mangar          | Co-I |
| London | St Marys Hospital (London)          | Stephen Mangar          |      |
| London | Guy's Hospital (London)             | Stephen Morris          |      |
| London | Guy's Hospital (London)             | Thomas Bird             |      |
| London | Guy's Hospital (London)             | Thubeena Manickavasagar |      |
| London | Royal Marsden Hospital (London)     | Tzveta porrovska        |      |
| London | Royal Marsden Hospital (London)     | Vedang Murthy           |      |
| London | Guy's Hospital (London)             | Vinod Mullassery        |      |
| London | Queen Elizabeth Hospital (Woolwich) | Vinod Mullassery        | Co-I |
| London | Guy's Hospital (London)             | Vishal Manik            | Co-I |
| London | Guy's Hospital (London)             | Yin Wu                  |      |
| London | Charing Cross Hospital              | Alison Falconer         | PI   |
| London | Hammersmith Hospital                | Alison Falconer         | PI   |
| London | St Marys Hospital (London)          | Alison Falconer         | PI   |
| London | Royal Marsden Hospital (London)     | Alison Reid             |      |
| London | Guy's Hospital (London)             | Angel Garcia-Imhof      |      |
| London | Guy's Hospital (London)             | Anna Karpathakis        |      |
| London | Guy's Hospital (London)             | Archie Macnair          |      |
| London | Queen Elizabeth Hospital (Woolwich) | Arunansu Kar            |      |
| London | North Middlesex Hospital            | Asim Ray                |      |
| London | Royal Free Hospital                 | Daniel Smith            |      |
| London | Guy's Hospital (London)             | Daniel Tong             |      |
| London | Guy's Hospital (London)             | Danielle Crawley        |      |
| London | Guy's Hospital (London)             | Debra Josephs           |      |

|        |                                     |                       |      |
|--------|-------------------------------------|-----------------------|------|
| London | Charing Cross Hospital              | Ethna Mannion         |      |
| London | North Middlesex Hospital            | Farhad Neave          |      |
| London | Guy's Hospital (London)             | Hartmut Kristeleit    |      |
| London | Queen Elizabeth Hospital (Woolwich) | Hartmut Kristeleit    |      |
| London | University College Hospital         | Heather Payne         | Co-I |
| London | North Middlesex Hospital            | Jackie Newby          |      |
| London | St Georges Hospital (London)        | Jason Chow            | Co-I |
| London | St Bartholomews Hospital (London)   | Jonathon Shamash      |      |
| London | University College Hospital         | Judith Cave           |      |
| London | Royal Marsden Hospital (London)     | Karen Chan            |      |
| London | Royal Free Hospital                 | Katherine Pigott      |      |
| London | Guy's Hospital (London)             | Lawrence Krieger      |      |
| London | St Georges Hospital (London)        | Lisa Pickering        |      |
| London | Guy's Hospital (London)             | Lucy Juggins          |      |
| London | Royal Free Hospital                 | Maria Vilarino-Varela | PI   |
| London | University College Hospital         | Mark Linch            | Co-I |
| London | St Georges Hospital (London)        | Mehran Afshar         | PI   |
| London | Charing Cross Hospital              | Naveed Sarwar         |      |
| London | Royal Marsden Hospital (London)     | Nicholas Van As       |      |
| London | Queen Elizabeth Hospital (Woolwich) | Nick Maisey           |      |
| London | St Bartholomews Hospital (London)   | Paula Wells           | Co-I |
| London | Guy's Hospital (London)             | Ramin Ajami           |      |
| London | University College Hospital         | Reena Davda           |      |
| London | Guy's Hospital (London)             | Ronald Beaney         |      |
| London | Royal Marsden Hospital (London)     | Rosalind Eeles        |      |
| London | Guy's Hospital (London)             | Rushan Sylva          |      |
| London | Guy's Hospital (London)             | Sarah Hargreaves      |      |
| London | Guy's Hospital (London)             | Sarah Rudman          | PI   |
| London | Guy's Hospital (London)             | Sharmistha Ghosh      |      |
| London | Guy's Hospital (London)             | Sheeba Irshad         |      |
| London | Guy's Hospital (London)             | Simon Chowdhury       |      |
| London | Guy's Hospital (London)             | Simon Hughes          |      |
| London | Queen Elizabeth Hospital (Woolwich) | Simon Hughes          |      |
| London | St Marys Hospital (London)          | Simon Stewart         |      |

|        |                                     |                        |            |
|--------|-------------------------------------|------------------------|------------|
| London | Queen Elizabeth Hospital (Woolwich) | Sindu Vivekanandan     | PI         |
| London | St Georges Hospital (London)        | Sophie McGrath         |            |
| London | St Bartholomews Hospital (London)   | Stephanie Gibbs        |            |
| London | University College Hospital         | Stephen Harland        |            |
| London | Guy's Hospital (London)             | Susanne Allan          |            |
| London | Guy's Hospital (London)             | Teresa Guerrero-Urbano |            |
| London | University College Hospital         | Ursula McGovern        | PI         |
| London | University College Hospital         | Uzma Asghar            |            |
| London | Guy's Hospital (London)             | Vasiliki Michalarea    |            |
| London | Royal Marsden Hospital (London)     | Vincent Khoo           | PI         |
| London | St Bartholomews Hospital (London)   | Wing-Kin Liu           |            |
| London | University College Hospital         | Thomas Amoaten         |            |
| London | St Georges Hospital (London)        | Alice Dainty           |            |
| London | Guy's Hospital (London)             | Anita Soma             | Pharmacist |
| London | St Georges Hospital (London)        | Asha Mistry            |            |
| London | St Georges Hospital (London)        | Claire Gilmartin       |            |
| London | Royal Marsden Hospital (London)     | Eleanor Quinn          |            |
| London | Royal Free Hospital                 | Emma Douch             |            |
| London | St Bartholomews Hospital (London)   | Hannah Payne           |            |
| London | Royal Marsden Hospital (London)     | Holly Hogan            |            |
| London | Royal Marsden Hospital (London)     | Jennyfa Ali            |            |
| London | Royal Free Hospital                 | Jessica Hunt           |            |
| London | Charing Cross Hospital              | Kerry Richards         |            |
| London | Royal Free Hospital                 | Kharishma Makani       |            |
| London | Guy's Hospital (London)             | Louisa McDonald        |            |
| London | University College Hospital         | Martha Wilson          |            |
| London | Royal Marsden Hospital (London)     | Nicola Lucas           |            |
| London | University College Hospital         | Nicole Bonsu           |            |
| London | St Bartholomews Hospital (London)   | Olivia Bolton          |            |
| London | University College Hospital         | Samirah Rokib          |            |
| London | Guy's Hospital (London)             | Sarah King             |            |
| London | St Georges Hospital (London)        | Serena Dover           |            |
| London | St Bartholomews Hospital (London)   | Sultana Begum          |            |
| London | Guy's Hospital (London)             | Tahereh Ghadimi        |            |



|        |                                     |                        |            |
|--------|-------------------------------------|------------------------|------------|
| London | St Georges Hospital (London)        | Uforma Ogrigri         | Pharmacist |
| London | Royal Marsden Hospital (London)     | Vijitha Vijayakumar    |            |
| London | Guy's Hospital (London)             | Vivien Quan            |            |
| London | Queen Elizabeth Hospital (Woolwich) | Melody Ncube           |            |
| London | Queen Elizabeth Hospital (Woolwich) | Abel Jalloh            |            |
| London | Queen Elizabeth Hospital (Woolwich) | Abhijit Jadhav         |            |
| London | Guy's Hospital (London)             | Antonio Querol-Rubiera |            |
| London | Guy's Hospital (London)             | Declan Cahill          |            |
| London | Guy's Hospital (London)             | Fahim Ahmed            |            |
| London | St Bartholomews Hospital (London)   | Fatjon Dekaj           |            |
| London | Charing Cross Hospital              | Gareth Barker          | Pharmacist |
| London | St Marys Hospital (London)          | Gareth Barker          |            |
| London | St Georges Hospital (London)        | Geoffrey Howell        |            |
| London | St Georges Hospital (London)        | Hakim Guessous         |            |
| London | University College Hospital         | Ignacio Blanch         |            |
| London | Queen Elizabeth Hospital (Woolwich) | Jagdev Bains           | Pharmacist |
| London | University College Hospital         | Joel Watson            |            |
| London | St Bartholomews Hospital (London)   | Jude Nixon             |            |
| London | St Georges Hospital (London)        | Juel Tuazon            |            |
| London | University College Hospital         | Kristian Warnes        | Pharmacist |
| London | Royal Marsden Hospital (London)     | Li Wancheung           |            |
| London | Queen Elizabeth Hospital (Woolwich) | Luke Maidment          |            |
| London | St Georges Hospital (London)        | Michael Brown          |            |
| London | Royal Marsden Hospital (London)     | Michael Money Penny    |            |
| London | St Bartholomews Hospital (London)   | Oscar Riches           |            |
| London | St Bartholomews Hospital (London)   | P Cathcart             |            |
| London | Guy's Hospital (London)             | Rayhan Ahmed           |            |
| London | Queen Elizabeth Hospital (Woolwich) | Rayhan Ahmed           |            |
| London | Guy's Hospital (London)             | Rick Popert            |            |
| London | St Georges Hospital (London)        | Robert Varro           |            |
| London | Charing Cross Hospital              | Ross Dalton-Short      |            |
| London | St Georges Hospital (London)        | Sam Hollingworth       |            |
| London | St Bartholomews Hospital (London)   | Sebastien Martin       |            |
| London | Whittington Hospital (London)       | Simon Wan              |            |

|        |                                     |                         |            |
|--------|-------------------------------------|-------------------------|------------|
| London | Guy's Hospital (London)             | Sumeet Sisodia          |            |
| London | Queen Elizabeth Hospital (Woolwich) | Vinod Muellesey         | PI         |
| London | St Bartholomews Hospital (London)   | Alastair Nicholson      |            |
| London | Royal Marsden Hospital (London)     | Bernard Sill            |            |
| London | Royal Marsden Hospital (London)     | Bernard Siu             |            |
| London | North Middlesex Hospital            | Chris Abbott            | Pharmacist |
| London | University College Hospital         | Danny Garrett           |            |
| London | Guy's Hospital (London)             | Gerry Trillana          |            |
| London | Hammersmith Hospital                | Ilyas Ali               |            |
| London | Guy's Hospital (London)             | Jozer Calara            |            |
| London | Charing Cross Hospital              | Kwame Ansu              |            |
| London | Queen Elizabeth Hospital (Woolwich) | Lee Porin               |            |
| London | St Georges Hospital (London)        | Mark Quarrell           |            |
| London | Queen Elizabeth Hospital (Woolwich) | Nigel Holmes            |            |
| London | Guy's Hospital (London)             | Philip Reynolds         |            |
| London | Queen Elizabeth Hospital (Woolwich) | Philip Reynolds         |            |
| London | Charing Cross Hospital              | Steve Edwards           |            |
| London | Hammersmith Hospital                | Steve Edwards           |            |
| London | St Marys Hospital (London)          | Steve Edwards           |            |
| London | Queen Elizabeth Hospital (Woolwich) | Thomas Sarkodie         |            |
| London | Guy's Hospital (London)             | Thomas Spencer          |            |
| London | Guy's Hospital (London)             | Trevor Bott             |            |
| London | Royal Marsden Hospital (London)     | Trevor Bott             |            |
| London | University College Hospital         | Adrienne Abioye         |            |
| London | Queen Elizabeth Hospital (Woolwich) | Joyce Maravi            |            |
| London | Royal Free Hospital                 | Kaliyane Ramtohol       |            |
| London | Guy's Hospital (London)             | Ngozi Muoneke           |            |
| London | St Georges Hospital (London)        | Nia Alsamarrai          |            |
| London | St Bartholomews Hospital (London)   | Resmi Jayachandran      |            |
| London | University College Hospital         | Roshni Goel             |            |
| London | Royal Marsden Hospital (London)     | Ruth Stafferton         |            |
| London | St Bartholomews Hospital (London)   | Samantha Chetiyawardana |            |
| London | Queen Elizabeth Hospital (Woolwich) | Samia Pilgrim           |            |
| London | Royal Marsden Hospital (London)     | Sarah Storrs            |            |

|        |                                     |                         |            |
|--------|-------------------------------------|-------------------------|------------|
| London | Charing Cross Hospital              | Zohanon Sabine Loko     |            |
| London | St Marys Hospital (London)          | Zohanon Sabine Loko     |            |
| London | Charing Cross Hospital              | Andrea Davis-Cook       | Pharmacist |
| London | St Marys Hospital (London)          | Andrea Davis-Cook       |            |
| London | Guy's Hospital (London)             | Chi Yee Chung           | Pharmacist |
| London | Royal Marsden Hospital (London)     | Debra Townsend-Thorn    |            |
| London | University College Hospital         | Holly Baker (nee. Wing) | Pharmacist |
| London | University College London           | Holly Baker (nee. Wing) |            |
| London | Hammersmith Hospital                | Regina Storch           | Pharmacist |
| London | Guy's Hospital (London)             | Sharon McPherson        |            |
| London | Royal Marsden Hospital (London)     | Sijy Pillai             |            |
| London | Royal Free Hospital                 | Aarti Nandani           | Pharmacist |
| London | Queen Elizabeth Hospital (Woolwich) | Aarti Shah              |            |
| London | University Hospital Lewisham        | Aarti Shah              |            |
| London | University College Hospital         | Agnieska Zielonka       |            |
| London | University College Hospital         | Aileen Austria          |            |
| London | Royal Free Hospital                 | Anna Osadcow            |            |
| London | St Georges Hospital (London)        | Anne Haldeos            |            |
| London | Queen Elizabeth Hospital (Woolwich) | Anne-Marie Vindidu      | Pharmacist |
| London | Royal Marsden Hospital (London)     | Annette Musallam        |            |
| London | Royal Marsden Hospital (London)     | Asma Varachia           |            |
| London | Guy's Hospital (London)             | Awo Abdi                |            |
| London | Charing Cross Hospital              | Bindu Chikkamuniyappa   |            |
| London | St Marys Hospital (London)          | Bindu Chikkamuniyappa   |            |
| London | St Georges Hospital (London)        | Chandni Patel           |            |
| London | Guy's Hospital (London)             | Claire Glendon          |            |
| London | Royal Free Hospital                 | Claire Jarvis           |            |
| London | St Georges Hospital (London)        | Deirdre Daly            |            |
| London | St Bartholomews Hospital (London)   | Denise Humfress         |            |
| London | Guy's Hospital (London)             | Emma O'Connor           |            |
| London | Guy's Hospital (London)             | Eva Batovska            |            |
| London | Royal Marsden Hospital (Sutton)     | Eva Batovska            | Pharmacist |
| London | Royal Marsden Hospital (London)     | Giulia Carlino          |            |
| London | Royal Free Hospital                 | Hannah Powell           |            |

|        |                                     |                      |            |
|--------|-------------------------------------|----------------------|------------|
| London | Royal Marsden Hospital (London)     | Helen Stidwell       |            |
| London | University College Hospital         | Helene Zilkha        |            |
| London | St Georges Hospital (London)        | Jane Gregg           |            |
| London | University College Hospital         | Jane Leach           | Pharmacist |
| London | University College Hospital         | Javeria Akhtar       |            |
| London | Queen Elizabeth Hospital (Woolwich) | Jennifer Martin      | Pharmacist |
| London | Royal Marsden Hospital (London)     | Juliet Owusu         |            |
| London | Guy's Hospital (London)             | Kafui Dossa          |            |
| London | Royal Marsden Hospital (London)     | Karen Brooks         |            |
| London | Royal Marsden Hospital (London)     | Lexi Vick            |            |
| London | Guy's Hospital (London)             | Linda Shephard       |            |
| London | Royal Free Hospital                 | Lorna O'Shea         |            |
| London | Guy's Hospital (London)             | Louisa Fleure        |            |
| London | St Bartholomews Hospital (London)   | Marina Baccarini     |            |
| London | Royal Marsden Hospital (London)     | Marisa Pinto Peixoto |            |
| London | Queen Elizabeth Hospital (Woolwich) | Martha Handousa      |            |
| London | Queen Elizabeth Hospital (Woolwich) | Miriam Cottle        |            |
| London | Queen Elizabeth Hospital (Woolwich) | Nadia El-Sayed       |            |
| London | Royal Free Hospital                 | Naomi Anderson       |            |
| London | University College Hospital         | Natasha Aslam        |            |
| London | Royal Marsden Hospital (London)     | Nicola Harman        |            |
| London | Hammersmith Hospital                | Nikki Kettley        |            |
| London | Guy's Hospital (London)             | Rebecca Way          |            |
| London | Royal Free Hospital                 | Sabina Melander      |            |
| London | Queen Elizabeth Hospital (Woolwich) | Sagira Khatun        | Pharmacist |
| London | Guy's Hospital (London)             | Sally Walker         |            |
| London | St Marys Hospital (London)          | Severine Rey         |            |
| London | St Bartholomews Hospital (London)   | Shahanara Ferdous    |            |
| London | Queen Elizabeth Hospital (Woolwich) | Shahreen Ahmed       |            |
| London | Queen Elizabeth Hospital (Woolwich) | Shanna Wilson        |            |
| London | Guy's Hospital (London)             | Susie Slater         |            |
| London | Queen Elizabeth Hospital (Woolwich) | Suzanne Chukundah    |            |
| London | University College Hospital         | Suzy Lowi            |            |
| London | Royal Free Hospital                 | Tesha Suddason       |            |

|        |                                     |                          |            |
|--------|-------------------------------------|--------------------------|------------|
| London | Queen Elizabeth Hospital (Woolwich) | Theodorah Nago           |            |
| London | University College Hospital         | Yemi Ilumoka             |            |
| London | Charing Cross Hospital              | Akeema Paul              |            |
| London | St Marys Hospital (London)          | Akeema Paul              |            |
| London | St Marys Hospital (London)          | Angela Chamberlain       |            |
| London | Royal Free Hospital                 | Angela McCadden          |            |
| London | Guy's Hospital (London)             | Anna Parker              |            |
| London | University College Hospital         | Annelies Gillesen        |            |
| London | Guy's Hospital (London)             | Belinda Chitando         |            |
| London | Queen Elizabeth Hospital (Woolwich) | Belinda Chitando         |            |
| London | Queen Elizabeth Hospital (Woolwich) | Bridget Kabagambe        |            |
| London | Guy's Hospital (London)             | Catherine Rogers         |            |
| London | Guy's Hospital (London)             | Cheryl Lawrence          |            |
| London | St Bartholomews Hospital (London)   | Cheryl Lawrence          | Pharmacist |
| London | Royal Marsden Hospital (London)     | Chloe McCormack          |            |
| London | Charing Cross Hospital              | Daisy Floyd              |            |
| London | St Marys Hospital (London)          | Daisy Floyd              |            |
| London | North Middlesex Hospital            | Debbie Blois             |            |
| London | Royal Marsden Hospital (London)     | Debbie Rolfe             |            |
| London | St Georges Hospital (London)        | Debbie Rolfe             |            |
| London | University College Hospital         | Didem Agdiran            |            |
| London | Guy's Hospital (London)             | Donna Cassidy            |            |
| London | Royal Free Hospital                 | Elizabeth Woodford       | Pharmacist |
| London | Guy's Hospital (London)             | Emilia Caverly           |            |
| London | Hammersmith Hospital                | Emily Pickford           |            |
| London | Queen Elizabeth Hospital (Woolwich) | Eti Omoregie             |            |
| London | Guy's Hospital (London)             | Francesca Curran         |            |
| London | St Marys Hospital (London)          | Gillian Hornzee          |            |
| London | University College Hospital         | Hannah Ansell            | Pharmacist |
| London | Queen Elizabeth Hospital (Woolwich) | Hazel Harrop             |            |
| London | Guy's Hospital (London)             | Helen Snow               |            |
| London | St Georges Hospital (London)        | Helen Tighe              |            |
| London | Charing Cross Hospital              | Ibiyemi Sadare (Olaleye) |            |
| London | St Bartholomews Hospital (London)   | Janet Kiff               |            |

|        |                                     |                       |            |
|--------|-------------------------------------|-----------------------|------------|
| London | St Bartholomews Hospital (London)   | Janet Oladimeji       |            |
| London | Guy's Hospital (London)             | Janette Nichol        |            |
| London | Royal Marsden Hospital (London)     | Jennifer Morrison     |            |
| London | Charing Cross Hospital              | Jill Gallagher        |            |
| London | St Marys Hospital (London)          | Joy Liao              |            |
| London | St Marys Hospital (London)          | Joy Liao              |            |
| London | North Middlesex Hospital            | Judy Hill             |            |
| London | Royal Free Hospital                 | Juniebel Cooke        | Pharmacist |
| London | Guy's Hospital (London)             | Kate Williams         |            |
| London | Royal Marsden Hospital (London)     | Laillah-Crystal Banda |            |
| London | Queen Elizabeth Hospital (Woolwich) | Laura Beschizza       |            |
| London | St Marys Hospital (London)          | Laura Custins         |            |
| London | North Middlesex Hospital            | Lorraine Hurl         |            |
| London | Guy's Hospital (London)             | Lucy Reed             |            |
| London | Queen Elizabeth Hospital (Woolwich) | Maria Liskova         |            |
| London | Royal Free Hospital                 | Marisa Lanzman        |            |
| London | St Marys Hospital (London)          | Melloney Allnut       |            |
| London | Guy's Hospital (London)             | Michelle Dutton       |            |
| London | Charing Cross Hospital              | Najma Ahmed           |            |
| London | University College Hospital         | Noan-Minh Chau        |            |
| London | University College Hospital         | Patricia Danaswamy    |            |
| London | Queen Elizabeth Hospital (Woolwich) | Rachel Harper         |            |
| London | Guy's Hospital (London)             | Rebecca Todd          |            |
| London | Guy's Hospital (London)             | Ruth Johnson          |            |
| London | Charing Cross Hospital              | Samantha Weller       |            |
| London | Royal Free Hospital                 | Sara Fawcitt          |            |
| London | Queen Elizabeth Hospital (Woolwich) | Sharai Chitando       |            |
| London | Guy's Hospital (London)             | Sharon Clovis         |            |
| London | St Georges Hospital (London)        | Sophie Golden         |            |
| London | Guy's Hospital (London)             | Srivani Kandasamy     |            |
| London | Guy's Hospital (London)             | Stephanie Argue       |            |
| London | Charing Cross Hospital              | Stephanie Steadman    |            |
| London | Royal Free Hospital                 | Su Fung Lo            | Pharmacist |
| London | St Georges Hospital (London)        | Sue Cromarty          |            |

|           |                                 |                      |            |
|-----------|---------------------------------|----------------------|------------|
| London    | Royal Marsden Hospital (London) | Suraya Quadir        |            |
| London    | Guy's Hospital (London)         | Suzanne Vizor        |            |
| London    | Guy's Hospital (London)         | Temi Olusi           | Pharmacist |
| London    | Guy's Hospital (London)         | Ursula Kirwan        |            |
| London    | University College Hospital     | John Masters         |            |
| London    | Royal Marsden Hospital (London) | Nicholas James       |            |
| London    | Guy's Hospital (London)         | Peter Harper         |            |
| London    | University College Hospital     | Richard Kaplan       | Co-I       |
| Maidstone | Maidstone Hospital              | Amanda Clarke        |            |
| Maidstone | Maidstone Hospital              | Claire Baldry        |            |
| Maidstone | Maidstone Hospital              | Delali Adjogatse     |            |
| Maidstone | Maidstone Hospital              | Patryk Brulinski     | PI         |
| Maidstone | Maidstone Hospital              | Alicia Synowiec      |            |
| Maidstone | Maidstone Hospital              | Clary Evans          |            |
| Maidstone | Maidstone Hospital              | Emma Kipps           |            |
| Maidstone | Maidstone Hospital              | Henry Taylor         |            |
| Maidstone | Maidstone Hospital              | Jess Brady           |            |
| Maidstone | Maidstone Hospital              | Kathryn Lees         |            |
| Maidstone | Maidstone Hospital              | Matthew Fittall      |            |
| Maidstone | Maidstone Hospital              | Romaana Mir          |            |
| Maidstone | Maidstone Hospital              | Sharon Beesley       |            |
| Maidstone | Maidstone Hospital              | Amie Thomas          |            |
| Maidstone | Maidstone Hospital              | Anna English         |            |
| Maidstone | Maidstone Hospital              | Katy Taylor          |            |
| Maidstone | Maidstone Hospital              | Gavin Fossey         |            |
| Maidstone | Maidstone Hospital              | Ian Pamphlett        |            |
| Maidstone | Maidstone Hospital              | Alison Davison       |            |
| Maidstone | Maidstone Hospital              | Ann Phillips         |            |
| Maidstone | Maidstone Hospital              | Jane Murray          |            |
| Maidstone | Maidstone Hospital              | Louise Hooper-Gilham |            |
| Maidstone | Maidstone Hospital              | Alison Richards      |            |
| Maidstone | Maidstone Hospital              | Carmel Jope          |            |
| Maidstone | Maidstone Hospital              | Clare Calvert        |            |
| Maidstone | Maidstone Hospital              | Jane Brown           |            |

|            |                      |                       |            |
|------------|----------------------|-----------------------|------------|
| Maidstone  | Maidstone Hospital   | Julia Sunnucks        |            |
| Maidstone  | Maidstone Hospital   | Laura Clayton         |            |
| Maidstone  | Maidstone Hospital   | Verity Roberts        |            |
| Maidstone  | Maidstone Hospital   | Claudia Woodger       |            |
| Maidstone  | Maidstone Hospital   | Emma Craske           |            |
| Maidstone  | Maidstone Hospital   | Joanne Patterson      | Pharmacist |
| Maidstone  | Maidstone Hospital   | Joanne Williams       |            |
| Maidstone  | Maidstone Hospital   | Lisa Tribe            |            |
| Maidstone  | Maidstone Hospital   | Sarah Martins         |            |
| Maidstone  | Maidstone Hospital   | Su Burrage            |            |
| Maidstone  | Maidstone Hospital   | Vivienne Breen        |            |
| Manchester | Christie Hospital    | Andrew Hudson         |            |
| Manchester | Christie Hospital    | Ather Kazmi           |            |
| Manchester | Christie Hospital    | Christoph Oing        | Co-I       |
| Manchester | Christie Hospital    | Hebalalla Abdelaal    |            |
| Manchester | Christie Hospital    | Martin Swinton        |            |
| Manchester | Christie Hospital    | Robin Portner         |            |
| Manchester | Christie Hospital    | Sreeja Aruketty       |            |
| Manchester | Christie Hospital    | Stefanie Fisder       |            |
| Manchester | Christie Hospital    | Stephen Chin          |            |
| Manchester | Christie Hospital    | Yee Pei Song          |            |
| Manchester | Christie Hospital    | A Jegannathen         |            |
| Manchester | Christie Hospital    | Ananya Choudhury      |            |
| Manchester | Christie Hospital    | Anna Bruzzan          |            |
| Manchester | Christie Hospital    | Anna Tran             |            |
| Manchester | Withington Hospital  | Beatriz Duran Jimenez | Pharmacist |
| Manchester | Wythenshawe Hospital | Beatriz Duran Jimenez |            |
| Manchester | Christie Hospital    | Catherine Coyle       |            |
| Manchester | Christie Hospital    | Clara Chan            |            |
| Manchester | Christie Hospital    | David Thompson        |            |
| Manchester | Christie Hospital    | Jacqueline Livsey     |            |
| Manchester | Christie Hospital    | James Wylie           |            |
| Manchester | Withington Hospital  | James Wylie           |            |
| Manchester | Christie Hospital    | John Logue            |            |



|            |                      |                                  |            |
|------------|----------------------|----------------------------------|------------|
| Manchester | Christie Hospital    | Michael Braun                    |            |
| Manchester | Christie Hospital    | Richard Cowan                    |            |
| Manchester | Christie Hospital    | Ruth Conroy                      | Co-I       |
| Manchester | Christie Hospital    | Shaun Tolan                      |            |
| Manchester | Christie Hospital    | Silke Gillessen                  |            |
| Manchester | Christie Hospital    | Tony Elliott                     |            |
| Manchester | Christie Hospital    | You Yone                         |            |
| Manchester | Christie Hospital    | Amber Hart                       |            |
| Manchester | Withington Hospital  | Anna Gipson                      |            |
| Manchester | Christie Hospital    | Charlotte Heywood                |            |
| Manchester | Christie Hospital    | Kim Fair                         |            |
| Manchester | Christie Hospital    | Laura Flanagan                   |            |
| Manchester | Christie Hospital    | Maria Petsa                      |            |
| Manchester | Christie Hospital    | Samah Mughal                     |            |
| Manchester | Christie Hospital    | Sarah Green                      |            |
| Manchester | Christie Hospital    | Sarah-Ellen Ellen (née McCarthy) |            |
| Manchester | Withington Hospital  | Tania Cutts                      |            |
| Manchester | Christie Hospital    | Willemijn Spoor                  |            |
| Manchester | Christie Hospital    | Alkesh Patel                     |            |
| Manchester | Christie Hospital    | Kamlesh Patel                    |            |
| Manchester | Christie Hospital    | Tony Elliott                     |            |
| Manchester | Withington Hospital  | A. Emara                         |            |
| Manchester | Wythenshawe Hospital | A. Emara                         |            |
| Manchester | Christie Hospital    | Ali Al-Hashimi                   | Pharmacist |
| Manchester | Christie Hospital    | Damian McCall                    |            |
| Manchester | Withington Hospital  | Damian McCall                    |            |
| Manchester | Christie Hospital    | Damian McCaul                    |            |
| Manchester | Christie Hospital    | Ekugbe Onogbe                    |            |
| Manchester | Christie Hospital    | Ekugbe Onoge                     |            |
| Manchester | Christie Hospital    | Ian Bottomley                    |            |
| Manchester | Christie Hospital    | Vijay Ramani                     |            |
| Manchester | Withington Hospital  | Vijay Ramani                     | Co-I       |
| Manchester | Christie Hospital    | Vijay Sangar                     |            |
| Manchester | Withington Hospital  | Vijay Sangar                     | PI         |

|            |                      |                      |    |
|------------|----------------------|----------------------|----|
| Manchester | Wythenshawe Hospital | Vijay Sangar         | PI |
| Manchester | Withington Hospital  | Helen Haydock        |    |
| Manchester | Withington Hospital  | Vivienne Benson      |    |
| Manchester | Wythenshawe Hospital | Vivienne Benson      |    |
| Manchester | Christie Hospital    | Kate O'Connor        |    |
| Manchester | Christie Hospital    | Sue Davison          |    |
| Manchester | Withington Hospital  | Annie Duffy          |    |
| Manchester | Wythenshawe Hospital | Annie Duffy          |    |
| Manchester | Christie Hospital    | Catherine Pettersen  |    |
| Manchester | Wythenshawe Hospital | Claire McGuire       |    |
| Manchester | Withington Hospital  | Humera Ahmed         |    |
| Manchester | Wythenshawe Hospital | Julie Fielding       |    |
| Manchester | Withington Hospital  | Kathryn Fellows      |    |
| Manchester | Wythenshawe Hospital | Kathryn Slevin       |    |
| Manchester | Wythenshawe Hospital | Kirsty Melia         |    |
| Manchester | Withington Hospital  | Linda Bailey         |    |
| Manchester | Wythenshawe Hospital | Linda Bailey         |    |
| Manchester | Christie Hospital    | Lucy Worsley         |    |
| Manchester | Christie Hospital    | Megan Bunce          |    |
| Manchester | Wythenshawe Hospital | Molly Bennett        |    |
| Manchester | Withington Hospital  | Rebecca Corless      |    |
| Manchester | Christie Hospital    | Roonak Nazari        |    |
| Manchester | Christie Hospital    | salina tsui          |    |
| Manchester | Wythenshawe Hospital | Sarah Liptrott       |    |
| Manchester | Christie Hospital    | Sharon Capper        |    |
| Manchester | Withington Hospital  | Stephanie Hargreaves |    |
| Manchester | Christie Hospital    | Thiraviyam Elumalai  |    |
| Manchester | Christie Hospital    | Trishna Uttamlal     |    |
| Manchester | Wythenshawe Hospital | Wendy Guest          |    |
| Manchester | Christie Hospital    | Zhara Mahmood        |    |
| Manchester | Wythenshawe Hospital | Angela Chrisopoulou  |    |
| Manchester | Wythenshawe Hospital | Angela Gowrie        |    |
| Manchester | Christie Hospital    | Anna Bowron          |    |
| Manchester | Christie Hospital    | Catherine Redshaw    |    |

|            |                                           |                     |            |
|------------|-------------------------------------------|---------------------|------------|
| Manchester | Withington Hospital                       | Catherine Redshaw   |            |
| Manchester | Christie Hospital                         | Cathryn James       |            |
| Manchester | Christie Hospital                         | Cathryn Jones       |            |
| Manchester | Christie Hospital                         | Emma Burke          |            |
| Manchester | Christie Hospital                         | Emma Lowther        |            |
| Manchester | Withington Hospital                       | Fiona Murtagh       |            |
| Manchester | Withington Hospital                       | Janet Smith         |            |
| Manchester | Christie Hospital                         | Jeanette Lyons      |            |
| Manchester | Christie Hospital                         | Joanne Oliver       |            |
| Manchester | Withington Hospital                       | Julie Bramley       |            |
| Manchester | Withington Hospital                       | Karen Robb          |            |
| Manchester | Withington Hospital                       | Lillian Partington  | Pharmacist |
| Manchester | Withington Hospital                       | Lindsay Piper       |            |
| Manchester | Wythenshawe Hospital                      | Lindsay Piper       |            |
| Manchester | Withington Hospital                       | Lorraine Turner     |            |
| Manchester | Christie Hospital                         | Lydia Sutherland    | Pharmacist |
| Manchester | Christie Hospital                         | Lynne Gilmore       |            |
| Manchester | Christie Hospital                         | Marie Woolley       |            |
| Manchester | Christie Hospital                         | Sarah-Ellen Smith   |            |
| Manchester | Christie Hospital                         | Sue Seifi           |            |
| Manchester | Christie Hospital                         | Susan Arrand        |            |
| Manchester | Withington Hospital                       | Tarnya Hulme        |            |
| Manchester | Withington Hospital                       | Thobekile Mthethwa  |            |
| Manchester | Wythenshawe Hospital                      | Thobekile Mthethwa  |            |
| Manchester | Withington Hospital                       | Tracey Platt        |            |
| Manchester | Wythenshawe Hospital                      | Tracey Platt        |            |
| Manchester | Christie Hospital                         | Noel Clarke         | PI         |
| Manchester | Christie Hospital                         | Jackie O'Dwyer      |            |
| Manchester | Christie Hospital                         | Viv Thomas          |            |
| Margate    | Queen Elizabeth The Queen Mother Hospital | Albert Edwards      | Co-I       |
| Margate    | Queen Elizabeth The Queen Mother Hospital | Charlotte Mott      |            |
| Margate    | Queen Elizabeth The Queen Mother Hospital | Ifigenia Vasiliadou | Co-I       |
| Margate    | Queen Elizabeth The Queen Mother Hospital | Lavarniya Rajakumar |            |
| Margate    | Queen Elizabeth The Queen Mother Hospital | Mathini Sridharan   |            |

|         |                                           |                     |            |
|---------|-------------------------------------------|---------------------|------------|
| Margate | Queen Elizabeth The Queen Mother Hospital | Patryk Brulinski    |            |
| Margate | Queen Elizabeth The Queen Mother Hospital | Rakesh Raman        | Co-I       |
| Margate | Queen Elizabeth The Queen Mother Hospital | Rohit Malde         |            |
| Margate | Queen Elizabeth The Queen Mother Hospital | Stephane Tankoua    |            |
| Margate | Queen Elizabeth The Queen Mother Hospital | Arafat Mizra        |            |
| Margate | Queen Elizabeth The Queen Mother Hospital | Carys Thomas        | PI         |
| Margate | Queen Elizabeth The Queen Mother Hospital | Clary Evans         |            |
| Margate | Queen Elizabeth The Queen Mother Hospital | Kannon Nathan       |            |
| Margate | Queen Elizabeth The Queen Mother Hospital | Kathryn Lees        |            |
| Margate | Queen Elizabeth The Queen Mother Hospital | Mathilda Cominos    |            |
| Margate | Queen Elizabeth The Queen Mother Hospital | Matthew Fenton      |            |
| Margate | Queen Elizabeth The Queen Mother Hospital | Mohammed Osman      |            |
| Margate | Queen Elizabeth The Queen Mother Hospital | Natasha Mithal      | Co-I       |
| Margate | Queen Elizabeth The Queen Mother Hospital | Sharon Beesley      |            |
| Margate | Queen Elizabeth The Queen Mother Hospital | Sugeeta Sukumar     |            |
| Margate | Queen Elizabeth The Queen Mother Hospital | Udaiveer Panwar     |            |
| Margate | Queen Elizabeth The Queen Mother Hospital | Coral Greenstreet   |            |
| Margate | Queen Elizabeth The Queen Mother Hospital | Hayley Blackgrove   |            |
| Margate | Queen Elizabeth The Queen Mother Hospital | Katy Taylor         |            |
| Margate | Queen Elizabeth The Queen Mother Hospital | Victoria Williamson |            |
| Margate | Queen Elizabeth The Queen Mother Hospital | Natalie Catt        |            |
| Margate | Queen Elizabeth The Queen Mother Hospital | Arafat Mirza        |            |
| Margate | Queen Elizabeth The Queen Mother Hospital | Sam Gibson          |            |
| Margate | Queen Elizabeth The Queen Mother Hospital | Steve Dann          |            |
| Margate | Queen Elizabeth The Queen Mother Hospital | Andrew Gillian      | Pharmacist |
| Margate | Queen Elizabeth The Queen Mother Hospital | Miguel Capo-Mir     | Pharmacist |
| Margate | Queen Elizabeth The Queen Mother Hospital | Cindy Slater        |            |
| Margate | Queen Elizabeth The Queen Mother Hospital | Hasmath Marjolin    |            |
| Margate | Queen Elizabeth The Queen Mother Hospital | Nikki Crisp         |            |
| Margate | Queen Elizabeth The Queen Mother Hospital | Rachel Larkins      |            |
| Margate | Queen Elizabeth The Queen Mother Hospital | Sandra Holness      |            |
| Margate | Queen Elizabeth The Queen Mother Hospital | Sarah Lines         |            |
| Margate | Queen Elizabeth The Queen Mother Hospital | Susan Rogers        |            |
| Margate | Queen Elizabeth The Queen Mother Hospital | Claire White        |            |

|                |                                                |                        |            |
|----------------|------------------------------------------------|------------------------|------------|
| Margate        | Queen Elizabeth The Queen Mother Hospital      | Julie Buckley          |            |
| Margate        | Queen Elizabeth The Queen Mother Hospital      | Laura Kehoe            |            |
| Margate        | Queen Elizabeth The Queen Mother Hospital      | Lesley Rose            |            |
| Margate        | Queen Elizabeth The Queen Mother Hospital      | Louise Gladwell        |            |
| Margate        | Queen Elizabeth The Queen Mother Hospital      | Sarah Lightfoot        | Pharmacist |
| Margate        | Queen Elizabeth The Queen Mother Hospital      | Tracy Boakes           |            |
| Margate        | Queen Elizabeth The Queen Mother Hospital      | Alba Tubau             |            |
| Margate        | Queen Elizabeth The Queen Mother Hospital      | Bonny Appleby          |            |
| Margate        | Queen Elizabeth The Queen Mother Hospital      | Jo Williams            |            |
| Margate        | Queen Elizabeth The Queen Mother Hospital      | Linda Wray             | Pharmacist |
| Margate        | Queen Elizabeth The Queen Mother Hospital      | Louise Allen           |            |
| Margate        | Queen Elizabeth The Queen Mother Hospital      | Marian Wood            |            |
| Margate        | Queen Elizabeth The Queen Mother Hospital      | Adedolapo Sanni        |            |
| Margate        | Queen Elizabeth The Queen Mother Hospital      | Claire Pelham          |            |
| Margate        | Queen Elizabeth The Queen Mother Hospital      | Elizabeth Williamson   |            |
| Margate        | Queen Elizabeth The Queen Mother Hospital      | Hilary Zurakovsky      |            |
| Margate        | Queen Elizabeth The Queen Mother Hospital      | Jill Baker             |            |
| Margate        | Queen Elizabeth The Queen Mother Hospital      | Joanne Williams        |            |
| Margate        | Queen Elizabeth The Queen Mother Hospital      | Julie-Ann Davies       |            |
| Margate        | Queen Elizabeth The Queen Mother Hospital      | Karen Robinson         |            |
| Margate        | Queen Elizabeth The Queen Mother Hospital      | Kathleen (Kathy) Walsh |            |
| Margate        | Queen Elizabeth The Queen Mother Hospital      | Kim Mears              |            |
| Margate        | Queen Elizabeth The Queen Mother Hospital      | Kim Travis             |            |
| Margate        | Queen Elizabeth The Queen Mother Hospital      | Margaret Lipsham       |            |
| Margate        | Queen Elizabeth The Queen Mother Hospital      | Paula Whichelo         |            |
| Margate        | Queen Elizabeth The Queen Mother Hospital      | Sharon Middleton       |            |
| Margate        | Queen Elizabeth The Queen Mother Hospital      | Sue Kelly              |            |
| Margate        | Queen Elizabeth The Queen Mother Hospital      | Susan Drakeley         |            |
| Margate        | Queen Elizabeth The Queen Mother Hospital      | Sydney Loveland        |            |
| Margate        | Queen Elizabeth The Queen Mother Hospital      | Molua Young            |            |
| Margate        | Queen Elizabeth The Queen Mother Hospital      | Denise Crawford        |            |
| Merseyside     | Southport and Formby District General Hospital | Julie Griffiths        |            |
| Middlesborough | James Cook University Hospital                 | Julia McBride          |            |
| Middlesborough | James Cook University Hospital                 | Fiona Rowling          | Pharmacist |

|               |                                |                       |            |
|---------------|--------------------------------|-----------------------|------------|
| Middlesbrough | James Cook University Hospital | Cheng Lee Chaw        |            |
| Middlesbrough | James Cook University Hospital | Maha Zarroug          |            |
| Middlesbrough | James Cook University Hospital | Mohammed Kagzi        |            |
| Middlesbrough | James Cook University Hospital | Clive Peedell         | PI         |
| Middlesbrough | James Cook University Hospital | David Wilson          |            |
| Middlesbrough | James Cook University Hospital | Devadasan Shakespeare |            |
| Middlesbrough | James Cook University Hospital | Hans Van der Voet     |            |
| Middlesbrough | James Cook University Hospital | Jason Wong            |            |
| Middlesbrough | James Cook University Hospital | John Hardman          |            |
| Middlesbrough | James Cook University Hospital | Steven Pratt          |            |
| Middlesbrough | James Cook University Hospital | Anne Hardwick         | Pharmacist |
| Middlesbrough | James Cook University Hospital | Emma Pringleton       |            |
| Middlesbrough | James Cook University Hospital | Jo Atkinson           |            |
| Middlesbrough | James Cook University Hospital | Joanne Atkinson       |            |
| Middlesbrough | James Cook University Hospital | Kate Rees             |            |
| Middlesbrough | James Cook University Hospital | Michaela Davenport    |            |
| Middlesbrough | James Cook University Hospital | Michaela Devenport    |            |
| Middlesbrough | James Cook University Hospital | Rebecca Richards      |            |
| Middlesbrough | James Cook University Hospital | Andrew Vaux           |            |
| Middlesbrough | James Cook University Hospital | Craig Mower           |            |
| Middlesbrough | James Cook University Hospital | Luca Settimo          |            |
| Middlesbrough | James Cook University Hospital | Piers Loxley Winder   |            |
| Middlesbrough | James Cook University Hospital | Piers Winders         |            |
| Middlesbrough | James Cook University Hospital | David Chadwick        |            |
| Middlesbrough | James Cook University Hospital | Keith Harland         |            |
| Middlesbrough | James Cook University Hospital | Paul Jones-King       |            |
| Middlesbrough | James Cook University Hospital | Alison Barnes         |            |
| Middlesbrough | James Cook University Hospital | Claire Elliott        |            |
| Middlesbrough | James Cook University Hospital | Emanuela Mahmoud      |            |
| Middlesbrough | James Cook University Hospital | Alison Chilvers       |            |
| Middlesbrough | James Cook University Hospital | Carol Long            |            |
| Middlesbrough | James Cook University Hospital | Helen Carver          |            |
| Middlesbrough | James Cook University Hospital | Jane Thompson         |            |
| Middlesbrough | James Cook University Hospital | Julie Potts           |            |

|                     |                                |                                |            |
|---------------------|--------------------------------|--------------------------------|------------|
| Middlesbrough       | James Cook University Hospital | Lisa Peacock (nee Wayman)      |            |
| Middlesbrough       | James Cook University Hospital | Paula Milne                    |            |
| Middlesbrough       | James Cook University Hospital | Emma Thompson                  |            |
| Middlesbrough       | James Cook University Hospital | Helen Dunn                     | Pharmacist |
| Middlesbrough       | James Cook University Hospital | Katherine Tyler                |            |
| Middlesbrough       | James Cook University Hospital | Lynne Naylor                   |            |
| Middlesbrough       | James Cook University Hospital | Sarah Kiddell                  |            |
| Middlesbrough       | James Cook University Hospital | Sarah McAuliffe                |            |
| Middlesbrough       | James Cook University Hospital | Agnieszka Skotnicka            | Pharmacist |
| Middlesbrough       | James Cook University Hospital | Andrea Watson                  |            |
| Middlesbrough       | James Cook University Hospital | Charlotte Jacobs(née Kitching) |            |
| Middlesbrough       | James Cook University Hospital | Rita Mohan                     |            |
| Middlesbrough       | James Cook University Hospital | Vicky Hanlon                   | Pharmacist |
| Newcastle upon Tyne | Newcastle General Hospital     | Judith Moore                   |            |
| Newcastle-upon-Tyne | Freeman Hospital               | Alex Mitchell                  |            |
| Newcastle-upon-Tyne | Freeman Hospital               | Elle Cameron                   |            |
| Newcastle-upon-Tyne | Freeman Hospital               | John Frew                      | Co-I       |
| Newcastle-upon-Tyne | Freeman Hospital               | Nicola Hannaway                |            |
| Newcastle-upon-Tyne | Freeman Hospital               | Noor Harris                    |            |
| Newcastle-upon-Tyne | Freeman Hospital               | Robert Chandler                |            |
| Newcastle-upon-Tyne | Freeman Hospital               | Shahid Iqbal                   | Co-I       |
| Newcastle-upon-Tyne | Freeman Hospital               | Ashraf Azzabi                  | PI         |
| Newcastle-upon-Tyne | Freeman Hospital               | Ian Pedley                     | Co-I       |
| Newcastle-upon-Tyne | Freeman Hospital               | Rhona McMenemin                | Co-I       |
| Newcastle-upon-Tyne | Freeman Hospital               | Amanda Henderson               |            |
| Newcastle-upon-Tyne | Freeman Hospital               | Catherine Marsh                |            |
| Newcastle-upon-Tyne | Freeman Hospital               | Emma King                      |            |
| Newcastle-upon-Tyne | Freeman Hospital               | Gemma O'Neill                  |            |
| Newcastle-upon-Tyne | Freeman Hospital               | Georgia Ross                   |            |
| Newcastle-upon-Tyne | Freeman Hospital               | Hannah Downs                   |            |
| Newcastle-upon-Tyne | Freeman Hospital               | Janine Tate                    |            |
| Newcastle-upon-Tyne | Freeman Hospital               | Katie Bain                     |            |
| Newcastle-upon-Tyne | Freeman Hospital               | Lucy Blackwell                 |            |
| Newcastle-upon-Tyne | Freeman Hospital               | Marianne Smith                 |            |

|                     |                  |                   |            |
|---------------------|------------------|-------------------|------------|
| Newcastle-upon-Tyne | Freeman Hospital | Victoria Thomas   |            |
| Newcastle-upon-Tyne | Freeman Hospital | Andrew Herridge   |            |
| Newcastle-upon-Tyne | Freeman Hospital | Craig Alderson    | Pharmacist |
| Newcastle-upon-Tyne | Freeman Hospital | Edgar Paez        |            |
| Newcastle-upon-Tyne | Freeman Hospital | Gerard Oakes      |            |
| Newcastle-upon-Tyne | Freeman Hospital | Ian Campbell      | Pharmacist |
| Newcastle-upon-Tyne | Freeman Hospital | Roger Carr        |            |
| Newcastle-upon-Tyne | Freeman Hospital | Thomas Jarvis     |            |
| Newcastle-upon-Tyne | Freeman Hospital | Ben Hood          |            |
| Newcastle-upon-Tyne | Freeman Hospital | Mark Johnson      |            |
| Newcastle-upon-Tyne | Freeman Hospital | Naeem Soomro      |            |
| Newcastle-upon-Tyne | Freeman Hospital | Peter Murphy      |            |
| Newcastle-upon-Tyne | Freeman Hospital | Dianne Turner     |            |
| Newcastle-upon-Tyne | Freeman Hospital | Elizabeth Reay    |            |
| Newcastle-upon-Tyne | Freeman Hospital | Kristine Hawkins  |            |
| Newcastle-upon-Tyne | Freeman Hospital | Ruth Latter       |            |
| Newcastle-upon-Tyne | Freeman Hospital | Sarah Osborne     |            |
| Newcastle-upon-Tyne | Freeman Hospital | Sarah Rowling     |            |
| Newcastle-upon-Tyne | Freeman Hospital | Sarah Wright      |            |
| Newcastle-upon-Tyne | Freeman Hospital | Nichola Waugh     |            |
| Newcastle-upon-Tyne | Freeman Hospital | Ann Hudson        |            |
| Newcastle-upon-Tyne | Freeman Hospital | Caroline Dobeson  |            |
| Newcastle-upon-Tyne | Freeman Hospital | Diane Conner      |            |
| Newcastle-upon-Tyne | Freeman Hospital | Diane Connor      |            |
| Newcastle-upon-Tyne | Freeman Hospital | Dianne Wake       |            |
| Newcastle-upon-Tyne | Freeman Hospital | Elaine Greaves    |            |
| Newcastle-upon-Tyne | Freeman Hospital | Hazel Forsyth     |            |
| Newcastle-upon-Tyne | Freeman Hospital | Hazel Masson      |            |
| Newcastle-upon-Tyne | Freeman Hospital | Irene Jobson      |            |
| Newcastle-upon-Tyne | Freeman Hospital | Jenny Smith       |            |
| Newcastle-upon-Tyne | Freeman Hospital | Julie Thohig      |            |
| Newcastle-upon-Tyne | Freeman Hospital | Laura Jameson     |            |
| Newcastle-upon-Tyne | Freeman Hospital | Lauren Boal       |            |
| Newcastle-upon-Tyne | Freeman Hospital | Lavanya Mariappan |            |



|                     |                                 |                      |            |
|---------------------|---------------------------------|----------------------|------------|
| Newcastle-upon-Tyne | Freeman Hospital                | Penny Bradley        |            |
| Newcastle-upon-Tyne | Freeman Hospital                | Ruth Sinnott         |            |
| Newcastle-upon-Tyne | Freeman Hospital                | Sue Farrell          |            |
| Newcastle-upon-Tyne | Freeman Hospital                | Sunita Kholi         |            |
| Newcastle-upon-Tyne | Freeman Hospital                | Sunita Kollu         |            |
| Newcastle-upon-Tyne | Freeman Hospital                | Xue Jiang            |            |
| Newcastle-upon-Tyne | Freeman Hospital                | Carole Stobbart      |            |
| Newcastle-upon-Tyne | Freeman Hospital                | Kay Carson           | Pharmacist |
| Newcastle-upon-Tyne | Freeman Hospital                | Lesley Naik          |            |
| Newport             | St Mary's Hospital (Newport)    | Kudingila Madhava    |            |
| Newport             | St Mary's Hospital (Newport)    | Alison Brown         |            |
| Newport             | St Mary's Hospital (Newport)    | Cindy Whitbread      |            |
| Newport             | St Mary's Hospital (Newport)    | Tracey Tidbury       |            |
| North Shields       | North Tyneside General Hospital | Mark Johnson         |            |
| Northampton         | Northampton General Hospital    | Rachel Gabitass      |            |
| Northwood           | Mount Vernon Hospital           | Neel Bhuva           |            |
| Northwood           | Mount Vernon Hospital           | Adam Mitchell        | Co-I       |
| Northwood           | Mount Vernon Hospital           | Charlotte Westbury   |            |
| Northwood           | Mount Vernon Hospital           | David Woolf          |            |
| Northwood           | Mount Vernon Hospital           | Hamoun Rozati        | Co-I       |
| Northwood           | Mount Vernon Hospital           | Hannah Tharmalingam  |            |
| Northwood           | Mount Vernon Hospital           | Janaka Cooray        |            |
| Northwood           | Mount Vernon Hospital           | Joanne Kosmin        |            |
| Northwood           | Mount Vernon Hospital           | Lai Cheng Yew        |            |
| Northwood           | Mount Vernon Hospital           | Mohammed Abdul-Latif |            |
| Northwood           | Mount Vernon Hospital           | Russell Moule        |            |
| Northwood           | Mount Vernon Hospital           | Sara Kashani         | Co-I       |
| Northwood           | Mount Vernon Hospital           | Claire Zane          |            |
| Northwood           | Mount Vernon Hospital           | Dolan Basak          |            |
| Northwood           | Mount Vernon Hospital           | Henry Mandeville     |            |
| Northwood           | Mount Vernon Hospital           | Huiqi Yang           |            |
| Northwood           | Mount Vernon Hospital           | Jeanette Dickson     |            |
| Northwood           | Mount Vernon Hospital           | Jennifer Chard       |            |
| Northwood           | Mount Vernon Hospital           | Kasia Owczarczyk     |            |

|           |                       |                  |            |
|-----------|-----------------------|------------------|------------|
| Northwood | Mount Vernon Hospital | Katie Wood       |            |
| Northwood | Mount Vernon Hospital | Kent Yip         |            |
| Northwood | Mount Vernon Hospital | Lai-Cheng Yew    |            |
| Northwood | Mount Vernon Hospital | Linda Swaney     |            |
| Northwood | Mount Vernon Hospital | M Williams       |            |
| Northwood | Mount Vernon Hospital | Mausam Singhera  |            |
| Northwood | Mount Vernon Hospital | Nicola Anyamene  |            |
| Northwood | Mount Vernon Hospital | Olivia Hatcher   |            |
| Northwood | Mount Vernon Hospital | Paolo De Jesu    |            |
| Northwood | Mount Vernon Hospital | Peter Ostler     |            |
| Northwood | Mount Vernon Hospital | Rachael Khong    |            |
| Northwood | Mount Vernon Hospital | Robert Hughes    |            |
| Northwood | Mount Vernon Hospital | Roberto Alonzi   |            |
| Northwood | Mount Vernon Hospital | Shaista Harpeer  |            |
| Northwood | Mount Vernon Hospital | Shiv Gayadeen    |            |
| Northwood | Mount Vernon Hospital | Sonia Li         |            |
| Northwood | Mount Vernon Hospital | Viwod Mullassery | PI         |
| Northwood | Mount Vernon Hospital | Aamna Rashid     |            |
| Northwood | Mount Vernon Hospital | Freya Ball       |            |
| Northwood | Mount Vernon Hospital | Harmeet Sangha   |            |
| Northwood | Mount Vernon Hospital | Juhee Kong       |            |
| Northwood | Mount Vernon Hospital | Lucy Collins     |            |
| Northwood | Mount Vernon Hospital | Rose Bell        |            |
| Northwood | Mount Vernon Hospital | Tahmina Shakil   |            |
| Northwood | Mount Vernon Hospital | Alice Ramsden    |            |
| Northwood | Mount Vernon Hospital | David Tan        |            |
| Northwood | Mount Vernon Hospital | Farhan Ahmed     | Pharmacist |
| Northwood | Mount Vernon Hospital | Sam Bosompem     | Pharmacist |
| Northwood | Mount Vernon Hospital | Heidi Rana       |            |
| Northwood | Mount Vernon Hospital | Jessica Finch    |            |
| Northwood | Mount Vernon Hospital | Kari Evans       |            |
| Northwood | Mount Vernon Hospital | Nalini Shah      |            |
| Northwood | Mount Vernon Hospital | Rakhi Jain       | Pharmacist |
| Northwood | Mount Vernon Hospital | Shakeda Lakha    |            |

|            |                                              |                        |            |
|------------|----------------------------------------------|------------------------|------------|
| Northwood  | Mount Vernon Hospital                        | Bhanthi Kanagaratnam   |            |
| Northwood  | Mount Vernon Hospital                        | Hannah Phillips        |            |
| Northwood  | Mount Vernon Hospital                        | Harsha Vara            | Pharmacist |
| Northwood  | Mount Vernon Hospital                        | Helen Cladd            |            |
| Northwood  | Mount Vernon Hospital                        | Justina Kailey         |            |
| Northwood  | Mount Vernon Hospital                        | Lesley Mitchell        |            |
| Northwood  | Mount Vernon Hospital                        | Nazma Damani           |            |
| Northwood  | Mount Vernon Hospital                        | Nicola Cutmore         |            |
| Northwood  | Mount Vernon Hospital                        | Paulina Kowalewska     |            |
| Northwood  | Mount Vernon Hospital                        | Sapna Kaur             |            |
| Northwood  | Mount Vernon Hospital                        | Elaine Lousley         |            |
| Northwood  | Mount Vernon Hospital                        | Hameeda Sultany        | Pharmacist |
| Northwood  | Mount Vernon Hospital                        | Jessica Milner         |            |
| Northwood  | Mount Vernon Hospital                        | Sara Abbassi           |            |
| Northwood  | Mount Vernon Hospital                        | Suzanne Jenkins        |            |
| Northwood  | Mount Vernon Hospital                        | Peter Hoskin           | PI         |
| Nottingham | Nottingham University Hospitals, City Campus | Adam Fullagar          |            |
| Nottingham | Nottingham University Hospitals, City Campus | Charlotte Kamlow       |            |
| Nottingham | Nottingham University Hospitals, City Campus | Chin Chong             |            |
| Nottingham | Nottingham University Hospitals, City Campus | Ewan Shawcroft         |            |
| Nottingham | Nottingham University Hospitals, City Campus | Junhao Lim             | Co-I       |
| Nottingham | Nottingham University Hospitals, City Campus | Lauren Jones           |            |
| Nottingham | Nottingham University Hospitals, City Campus | Maeve Pomeroy          |            |
| Nottingham | Nottingham University Hospitals, City Campus | Melanie Boafo-Yirenkyi |            |
| Nottingham | Nottingham University Hospitals, City Campus | Rebekah Webb           |            |
| Nottingham | Nottingham University Hospitals, City Campus | Rohan Tharaka          | Co-I       |
| Nottingham | Nottingham University Hospitals, City Campus | Rohan Tharakan         |            |
| Nottingham | Nottingham University Hospitals, City Campus | Sadia Abdullah         | Co-I       |
| Nottingham | Nottingham University Hospitals, City Campus | Sarah Taylor           |            |
| Nottingham | Nottingham University Hospitals, City Campus | Shiv Uppal             |            |
| Nottingham | Nottingham University Hospitals, City Campus | Thomas Moore           |            |
| Nottingham | Nottingham University Hospitals, City Campus | Wai Hou Sam            |            |
| Nottingham | Nottingham University Hospitals, City Campus | Ananth Sivanandan      |            |
| Nottingham | Nottingham University Hospitals, City Campus | Charlotte Ellis        |            |

|            |                                              |                         |            |
|------------|----------------------------------------------|-------------------------|------------|
| Nottingham | Nottingham University Hospitals, City Campus | Daniel Saunders         |            |
| Nottingham | Nottingham University Hospitals, City Campus | Eliot Chadwick          | Co-I       |
| Nottingham | Nottingham University Hospitals, City Campus | Georgina Walker         | Co-I       |
| Nottingham | Nottingham University Hospitals, City Campus | Ian Sayers              |            |
| Nottingham | Nottingham University Hospitals, City Campus | Jamie Mills             |            |
| Nottingham | Nottingham University Hospitals, City Campus | Louise Brookes          |            |
| Nottingham | Nottingham University Hospitals, City Campus | Santhanam Sundar        | PI         |
| Nottingham | Nottingham University Hospitals, City Campus | Adele Malson            |            |
| Nottingham | Nottingham University Hospitals, City Campus | Asmaa Sa Omer           |            |
| Nottingham | Nottingham University Hospitals, City Campus | Camille Hutchinson      |            |
| Nottingham | Nottingham University Hospitals, City Campus | Hannah Thurlow          |            |
| Nottingham | Nottingham University Hospitals, City Campus | Jade Eggleton           |            |
| Nottingham | Nottingham University Hospitals, City Campus | Kayleigh Mills          |            |
| Nottingham | Nottingham University Hospitals, City Campus | Lucy Howard             |            |
| Nottingham | Nottingham University Hospitals, City Campus | Leanne Alder            |            |
| Nottingham | Nottingham University Hospitals, City Campus | Alex Blades             |            |
| Nottingham | Nottingham University Hospitals, City Campus | Jacob Szolin-Jones      |            |
| Nottingham | Nottingham University Hospitals, City Campus | Daniel Kumar            |            |
| Nottingham | Nottingham University Hospitals, City Campus | Matthew Brazkiewicz     |            |
| Nottingham | Nottingham University Hospitals, City Campus | Owen Cole               |            |
| Nottingham | Nottingham University Hospitals, City Campus | Tin Sang-Tsang          | Pharmacist |
| Nottingham | Nottingham University Hospitals, City Campus | Anita Stevenson         | Pharmacist |
| Nottingham | Nottingham University Hospitals, City Campus | Katie Carter            |            |
| Nottingham | Nottingham University Hospitals, City Campus | Phillipa Sum            |            |
| Nottingham | Nottingham University Hospitals, City Campus | Samantha Chetiyawardana |            |
| Nottingham | Nottingham University Hospitals, City Campus | Tania Slater            |            |
| Nottingham | Nottingham University Hospitals, City Campus | Carol Gooch             |            |
| Nottingham | Nottingham University Hospitals, City Campus | Kathryn Moore           |            |
| Nottingham | Nottingham University Hospitals, City Campus | Susan Elliott           |            |
| Nottingham | Nottingham University Hospitals, City Campus | Cody Jevons             |            |
| Nottingham | Nottingham University Hospitals, City Campus | Rachael Chivers         |            |
| Nottingham | Nottingham University Hospitals, City Campus | Sarah Widdowson         |            |
| Nottingham | Nottingham University Hospitals, City Campus | Stephanie McGonagle     |            |
| Nottingham | Nottingham University Hospitals, City Campus | Caitlin Todd            |            |

|            |                                              |                  |            |
|------------|----------------------------------------------|------------------|------------|
| Nottingham | Nottingham University Hospitals, City Campus | Rena Chauhan     | Pharmacist |
| Nottingham | Nottingham University Hospitals, City Campus | Stacey Green     |            |
| Nuneaton   | George Eliot Hospital                        | Andrew White     |            |
| Nuneaton   | George Eliot Hospital                        | Ellanna Guithi   |            |
| Nuneaton   | George Eliot Hospital                        | Michael Tilby    | Co-I       |
| Nuneaton   | George Eliot Hospital                        | Andrew Chan      |            |
| Nuneaton   | George Eliot Hospital                        | Yakhub Khan      | PI         |
| Nuneaton   | George Eliot Hospital                        | Damilola Jayeoba | Pharmacist |
| Nuneaton   | George Eliot Hospital                        | Holly Lawrence   |            |
| Nuneaton   | George Eliot Hospital                        | Kerry Flahive    |            |
| Nuneaton   | George Eliot Hospital                        | sara Taylor      |            |
| Nuneaton   | George Eliot Hospital                        | Arandeep Hayer   |            |
| Nuneaton   | George Eliot Hospital                        | Albert Mislant   |            |
| Nuneaton   | George Eliot Hospital                        | Jacob Bourne     |            |
| Nuneaton   | George Eliot Hospital                        | Andrea Mills     |            |
| Nuneaton   | George Eliot Hospital                        | Inderjit Atwal   |            |
| Nuneaton   | George Eliot Hospital                        | Jenna Williams   |            |
| Nuneaton   | George Eliot Hospital                        | Alison McCallum  |            |
| Nuneaton   | George Eliot Hospital                        | Jessica Gunn     |            |
| Nuneaton   | George Eliot Hospital                        | Karen Shorthose  |            |
| Nuneaton   | George Eliot Hospital                        | Michaela Hill    |            |
| Nuneaton   | George Eliot Hospital                        | Pritpal Klear    |            |
| Nuneaton   | George Eliot Hospital                        | Rachael Oates    |            |
| Nuneaton   | George Eliot Hospital                        | Rachel Fergusson |            |
| Nuneaton   | George Eliot Hospital                        | Sarah Fergusson  |            |
| Nuneaton   | George Eliot Hospital                        | Winni Singh      |            |
| Nuneaton   | George Eliot Hospital                        | Jeanette Knapp   |            |
| Nuneaton   | George Eliot Hospital                        | Melanie Taylor   | Pharmacist |
| Nuneaton   | George Eliot Hospital                        | Sabiya Nasima    |            |
| Nuneaton   | George Eliot Hospital                        | Judith Lake      |            |
| Oldham     | Royal Oldham Hospital                        | Agata Rembielak  |            |
| Oldham     | Royal Oldham Hospital                        | Anthea Cree      |            |
| Oldham     | Royal Oldham Hospital                        | Ehab Ibrahim     | Co-I       |
| Oldham     | Royal Oldham Hospital                        | Helen Joyce      |            |

|        |                       |                       |            |
|--------|-----------------------|-----------------------|------------|
| Oldham | Royal Oldham Hospital | Hwoeifen Soohoo       |            |
| Oldham | Royal Oldham Hospital | Kanal Gupta           |            |
| Oldham | Royal Oldham Hospital | Mohammad Abutarb      |            |
| Oldham | Royal Oldham Hospital | Parth Desai           | Co-I       |
| Oldham | Royal Oldham Hospital | Richard Walshaw       |            |
| Oldham | Royal Oldham Hospital | Shabaz Hussain        |            |
| Oldham | Royal Oldham Hospital | Shazril Imran Shaukat |            |
| Oldham | Royal Oldham Hospital | Stephen Kennedy       |            |
| Oldham | Royal Oldham Hospital | Victoria Lavin        |            |
| Oldham | Royal Oldham Hospital | Ananya Choudhury      | Co-I       |
| Oldham | Royal Oldham Hospital | Anna Tran             | Co-I       |
| Oldham | Royal Oldham Hospital | Jacqueline Livsey     |            |
| Oldham | Royal Oldham Hospital | Peter Mbanu           |            |
| Oldham | Royal Oldham Hospital | Ruth Conroy           | PI         |
| Oldham | Royal Oldham Hospital | Shaveta Mehta         | Co-I       |
| Oldham | Royal Oldham Hospital | Dellesa Robinson      |            |
| Oldham | Royal Oldham Hospital | Sophie Hovenden       |            |
| Oldham | Royal Oldham Hospital | Mark Livingstone      | Pharmacist |
| Oldham | Royal Oldham Hospital | Farhan Karim          |            |
| Oldham | Royal Oldham Hospital | Richard Jones         |            |
| Oldham | Royal Oldham Hospital | Terence Hinton        |            |
| Oldham | Royal Oldham Hospital | Sarah Warran          |            |
| Oldham | Royal Oldham Hospital | Udeme Ohia            | Pharmacist |
| Oldham | Royal Oldham Hospital | Leena Mistry          |            |
| Oldham | Royal Oldham Hospital | Amy Slack             |            |
| Oldham | Royal Oldham Hospital | Anna Pracz            | Pharmacist |
| Oldham | Royal Oldham Hospital | Dawn Johnstone        |            |
| Oldham | Royal Oldham Hospital | Joanne Allsop         |            |
| Oldham | Royal Oldham Hospital | Joanne Johnson        |            |
| Oldham | Royal Oldham Hospital | Joanne Reed           |            |
| Oldham | Royal Oldham Hospital | Kamala Ramatar        |            |
| Oldham | Royal Oldham Hospital | Kirstie Smith         |            |
| Oldham | Royal Oldham Hospital | Lyndsay Scarratt      |            |
| Oldham | Royal Oldham Hospital | Ruth Halford          |            |

|        |                       |                      |            |
|--------|-----------------------|----------------------|------------|
| Oldham | Royal Oldham Hospital | Suzanne Bland        |            |
| Oldham | Royal Oldham Hospital | Wendy Cook           |            |
| Oldham | Royal Oldham Hospital | Hadia Ashraf         |            |
| Oldham | Royal Oldham Hospital | Jemma McLaughlin     | Pharmacist |
| Oxford | Churchill Hospital    | Ami Sabharwal        | Co-I       |
| Oxford | Churchill Hospital    | Avinash Gupta        | Co-I       |
| Oxford | Churchill Hospital    | Katherine Hyde       | Co-I       |
| Oxford | Churchill Hospital    | Laura Robledo        |            |
| Oxford | Churchill Hospital    | Silke Hahnewald      |            |
| Oxford | Churchill Hospital    | Simon Wyatt          |            |
| Oxford | Churchill Hospital    | Tessa Greenhalgh     |            |
| Oxford | Churchill Hospital    | Thinn Pwint          |            |
| Oxford | Churchill Hospital    | Benjamin Fairfax     | Co-I       |
| Oxford | Churchill Hospital    | David J Cole         | Co-I       |
| Oxford | Churchill Hospital    | Elaine Sugden        |            |
| Oxford | Churchill Hospital    | Gerard Andrade       | Co-I       |
| Oxford | Churchill Hospital    | Mark Prentice        |            |
| Oxford | Churchill Hospital    | Meenali Chitnis      | Co-I       |
| Oxford | Churchill Hospital    | Paul Colin Miller    |            |
| Oxford | Churchill Hospital    | Philip Camilleri     | Co-I       |
| Oxford | Churchill Hospital    | Robert Stuart        | Co-I       |
| Oxford | Churchill Hospital    | Robert Watson        |            |
| Oxford | Churchill Hospital    | Elizabeth Hadley     |            |
| Oxford | Churchill Hospital    | Kelly Wigglesworth   |            |
| Oxford | Churchill Hospital    | Lauren Booker        |            |
| Oxford | Churchill Hospital    | Patrycja Jastrzebska |            |
| Oxford | Churchill Hospital    | Sophia Shahzad       |            |
| Oxford | Churchill Hospital    | Swapna Thummala      |            |
| Oxford | Churchill Hospital    | Sywlia Bekulart      |            |
| Oxford | Churchill Hospital    | Daniel Ajzensztejn   | Co-I       |
| Oxford | Churchill Hospital    | Henry Chesson        |            |
| Oxford | Churchill Hospital    | Hugo De La Pena      |            |
| Oxford | Churchill Hospital    | Mark Tuthill         |            |
| Oxford | Churchill Hospital    | Naveen Sankighatta   |            |

|         |                          |                           |            |
|---------|--------------------------|---------------------------|------------|
| Oxford  | Churchill Hospital       | Richard Cousins           |            |
| Oxford  | Churchill Hospital       | Will Goodman              |            |
| Oxford  | Churchill Hospital       | Matthew Mooney            |            |
| Oxford  | Churchill Hospital       | Martha Woodward           |            |
| Oxford  | Churchill Hospital       | Rachel Hart               |            |
| Oxford  | Churchill Hospital       | Rosita Broderick          |            |
| Oxford  | Churchill Hospital       | Ann Murphy                |            |
| Oxford  | Churchill Hospital       | Charlotte Davies          |            |
| Oxford  | Churchill Hospital       | Jo Wilson                 |            |
| Oxford  | Churchill Hospital       | Kerrie Marston            |            |
| Oxford  | Churchill Hospital       | Julie Pinder              |            |
| Oxford  | Churchill Hospital       | Katherine Jacob           | Pharmacist |
| Oxford  | Churchill Hospital       | Magdalena Benysek         |            |
| Oxford  | Churchill Hospital       | Sandra Mukkath            |            |
| Oxford  | Churchill Hospital       | Sarah Markus              |            |
| Oxford  | Churchill Hospital       | Ana De Veciana            | Pharmacist |
| Oxford  | Churchill Hospital       | Anju Chalin               |            |
| Oxford  | Churchill Hospital       | Evanthia Komninidou       |            |
| Oxford  | Churchill Hospital       | Gabriela Kuzmycha         |            |
| Oxford  | Churchill Hospital       | Gemma Austin (nee Glover) |            |
| Oxford  | Churchill Hospital       | Hazel Wynn                |            |
| Oxford  | Churchill Hospital       | Jane Boutflower           |            |
| Oxford  | Churchill Hospital       | Sarah Lawrey              |            |
| Oxford  | Churchill Hospital       | Trish Green               |            |
| Oxford  | Churchill Hospital       | Usharani Devi Wahengbam   |            |
| Oxford  | Churchill Hospital       | Andrew Protheroe          | PI         |
| Paisley | Royal Alexandra Hospital | Tiago Rodrigues           |            |
| Poole   | Poole Hospital           | Fiona Mellor              |            |
| Poole   | Poole Hospital           | Joseph Davies             | Co-I       |
| Poole   | Poole Hospital           | Yogesh Nishchal           | Co-I       |
| Poole   | Poole Hospital           | Joe Davies                |            |
| Poole   | Poole Hospital           | Maxine Flubacher          |            |
| Poole   | Poole Hospital           | May Lwin                  |            |
| Poole   | Poole Hospital           | Perric Crellin            | Co-I       |



|           |                         |                    |            |
|-----------|-------------------------|--------------------|------------|
| Poole     | Poole Hospital          | Sue Brock          | PI         |
| Poole     | Poole Hospital          | Becky Troke        |            |
| Poole     | Poole Hospital          | Felicity Clapp     |            |
| Poole     | Poole Hospital          | Sarah Patch        |            |
| Poole     | Poole Hospital          | Elizabeth Woodward |            |
| Poole     | Poole Hospital          | Nichola Downs      |            |
| Poole     | Poole Hospital          | Craig Vincent      |            |
| Poole     | Poole Hospital          | Neal Beamish       |            |
| Poole     | Poole Hospital          | Roger Wheelwright  |            |
| Poole     | Poole Hospital          | Deryck Burton      |            |
| Poole     | Poole Hospital          | Lee Tbaily         |            |
| Poole     | Poole Hospital          | Emma Wesley        |            |
| Poole     | Poole Hospital          | Emma Williams      |            |
| Poole     | Poole Hospital          | Helen Morling      |            |
| Poole     | Poole Hospital          | Kate Mutendera     |            |
| Poole     | Poole Hospital          | Kate Urquhart      |            |
| Poole     | Poole Hospital          | Louise Heckford    |            |
| Poole     | Poole Hospital          | Savina Elitova     | Pharmacist |
| Poole     | Poole Hospital          | Delia Whiteman     |            |
| Poole     | Poole Hospital          | Elizabeth Clarke   |            |
| Poole     | Poole Hospital          | Lyn Jackson        |            |
| Poole     | Poole Hospital          | Sally Munden       |            |
| Poole     | Poole Hospital          | Sharon Power       | Pharmacist |
| Poole     | Poole Hospital          | Sophie Rix         |            |
| Poole     | Poole Hospital          | Stephanie Jones    |            |
| Poole     | Poole Hospital          | Amanda Iskender    |            |
| Poole     | Poole Hospital          | Hilary Blaney      |            |
| Poole     | Poole Hospital          | Sally Gillespie    |            |
| Poole     | Poole Hospital          | Sandy Pressdee     |            |
| Poole     | Poole Hospital          | Sara Orford        |            |
| Poole     | Poole Hospital          | Seonaid Wright     |            |
| Poole     | Poole Hospital          | Susan Saxby        |            |
| Poole     | Poole Hospital          | Teresa Coffin      |            |
| Portadown | Craigavon Area Hospital | Fionnuala Houghton | Co-I       |

|            |                          |                     |      |
|------------|--------------------------|---------------------|------|
| Portadown  | Craigavon Area Hospital  | Judith Carser       | PI   |
| Portadown  | Craigavon Area Hospital  | Leanne McCourt      |      |
| Portsmouth | Queen Alexandra Hospital | Akash Maniam        |      |
| Portsmouth | Queen Alexandra Hospital | Akash Maniam        |      |
| Portsmouth | Queen Alexandra Hospital | Alice White         |      |
| Portsmouth | Queen Alexandra Hospital | Alisha Damani       |      |
| Portsmouth | Queen Alexandra Hospital | Azarel Virgo        |      |
| Portsmouth | Queen Alexandra Hospital | Caroline Chau       |      |
| Portsmouth | Queen Alexandra Hospital | Charlotte Davies    |      |
| Portsmouth | Queen Alexandra Hospital | Chloe Holden        |      |
| Portsmouth | Queen Alexandra Hospital | Eleanor Jones       |      |
| Portsmouth | Queen Alexandra Hospital | Harliana Mohd Yusof | Co-I |
| Portsmouth | Queen Alexandra Hospital | Jack Broadfoot      |      |
| Portsmouth | Queen Alexandra Hospital | Jeng Heng Ching     |      |
| Portsmouth | Queen Alexandra Hospital | Joanna Hack         | Co-I |
| Portsmouth | Queen Alexandra Hospital | Joni Howells        |      |
| Portsmouth | Queen Alexandra Hospital | Kudingila Madhava   |      |
| Portsmouth | Queen Alexandra Hospital | Mark Noble          |      |
| Portsmouth | Queen Alexandra Hospital | Matthew Moe         |      |
| Portsmouth | Queen Alexandra Hospital | Megan Rowley        |      |
| Portsmouth | Queen Alexandra Hospital | Mona Hassan         |      |
| Portsmouth | Queen Alexandra Hospital | Nataliya Martynyuk  |      |
| Portsmouth | Queen Alexandra Hospital | Oluwatobi Adeagbo   | Co-I |
| Portsmouth | Queen Alexandra Hospital | Shyamkia Acharige   | Co-I |
| Portsmouth | Queen Alexandra Hospital | Syed Shah           | Co-I |
| Portsmouth | Queen Alexandra Hospital | Umapathy Hombaiah   | Co-I |
| Portsmouth | Queen Alexandra Hospital | Vara Prasad Devara  |      |
| Portsmouth | Queen Alexandra Hospital | Victoria True       |      |
| Portsmouth | Queen Alexandra Hospital | Yvonne Mangan       |      |
| Portsmouth | Queen Alexandra Hospital | Joanna Gale         | PI   |
| Portsmouth | Queen Alexandra Hospital | Khalid Hameed       |      |
| Portsmouth | Queen Alexandra Hospital | Mario Uccello       |      |
| Portsmouth | Queen Alexandra Hospital | May Lwin            |      |
| Portsmouth | Queen Alexandra Hospital | Mya Gyi             |      |

|              |                          |                     |            |
|--------------|--------------------------|---------------------|------------|
| Portsmouth   | Queen Alexandra Hospital | Sarah Ellis         |            |
| Portsmouth   | Queen Alexandra Hospital | Yoodhvir Nagar      |            |
| Portsmouth   | Queen Alexandra Hospital | Daniel Bloomfield   |            |
| Portsmouth   | Queen Alexandra Hospital | Dominic Hodgson     |            |
| Portsmouth   | Queen Alexandra Hospital | Robert Williams     |            |
| Portsmouth   | Queen Alexandra Hospital | Jennifer Hale       |            |
| Portsmouth   | Queen Alexandra Hospital | Jillian Andrews     |            |
| Portsmouth   | Queen Alexandra Hospital | Tracey Dobson       |            |
| Portsmouth   | Queen Alexandra Hospital | Tracy Callen        |            |
| Portsmouth   | Queen Alexandra Hospital | Wendy Golding       | Pharmacist |
| Portsmouth   | Queen Alexandra Hospital | Wendy Stacey        |            |
| Portsmouth   | Queen Alexandra Hospital | Catherine Tolentino |            |
| Portsmouth   | Queen Alexandra Hospital | Giuseppe Banna      | Co-I       |
| Portsmouth   | Queen Alexandra Hospital | Heather Cuell       |            |
| Portsmouth   | Queen Alexandra Hospital | Kathy Blight        | Pharmacist |
| Portsmouth   | Queen Alexandra Hospital | Lisa Murray         |            |
| Portsmouth   | Queen Alexandra Hospital | Mila Roca           |            |
| Portsmouth   | Queen Alexandra Hospital | Anna Stephenson     |            |
| Portsmouth   | Queen Alexandra Hospital | Badriyya Mohamedali |            |
| Portsmouth   | Queen Alexandra Hospital | Catrin Watkinson    |            |
| Portsmouth   | Queen Alexandra Hospital | Lorna Meadows       |            |
| Portsmouth   | Queen Alexandra Hospital | Mary Wands          | Pharmacist |
| Postfach 834 | Kantonsspital Winterthur | Claudia Langer      |            |
| Postfach 834 | Kantonsspital Winterthur | Miklos Pless        |            |
| Postfach 834 | Kantonsspital Winterthur | Natalie Fisher      |            |
| Postfach 834 | Kantonsspital Winterthur | Sabina Schacher     |            |
| Postfach 834 | Kantonsspital Winterthur | SusyAnn Shaw        |            |
| Postfach 834 | Kantonsspital Winterthur | Veronika Nagy       |            |
| Postfach 834 | Kantonsspital Winterthur | Beatrice Brinkers   |            |
| Postfach 834 | Kantonsspital Winterthur | Cindy Wanger        |            |
| Postfach 834 | Kantonsspital Winterthur | Martina Pfitzner    |            |
| Postfach 834 | Kantonsspital Winterthur | Nicole Kradolfer    |            |
| Postfach 834 | Kantonsspital Winterthur | Hubert John         | PI         |

|                |                                     |                          |            |
|----------------|-------------------------------------|--------------------------|------------|
| Prescot Street | Royal Liverpool University Hospital | Lynsey Dean              |            |
| Preston        | Royal Preston Hospital              | Christina Hague          | Co-I       |
| Preston        | Royal Preston Hospital              | Jose Rico                | Co-I       |
| Preston        | Royal Preston Hospital              | Martin Swinton           |            |
| Preston        | Royal Preston Hospital              | Natalie Charnley         | Co-I       |
| Preston        | Royal Preston Hospital              | Nicola Flaum             | Co-I       |
| Preston        | Royal Preston Hospital              | Omi Parikh               | Co-I       |
| Preston        | Royal Preston Hospital              | Sophie Raby              | Co-I       |
| Preston        | Royal Preston Hospital              | William Croxford         |            |
| Preston        | Royal Preston Hospital              | Yee Pei Song             | Co-I       |
| Preston        | Royal Preston Hospital              | Alison Birtle            | PI         |
| Preston        | Royal Preston Hospital              | Anna Macpherson          |            |
| Preston        | Royal Preston Hospital              | Catherine Thompson       |            |
| Preston        | Royal Preston Hospital              | Deborah Williamson       |            |
| Preston        | Royal Preston Hospital              | Duleer Majeed            | Co-I       |
| Preston        | Royal Preston Hospital              | Falalu Danwata           |            |
| Preston        | Royal Preston Hospital              | Marcus Wise              | Co-I       |
| Preston        | Royal Preston Hospital              | Norma Sidek              |            |
| Preston        | Royal Preston Hospital              | Shahzad Gul              |            |
| Preston        | Royal Preston Hospital              | Tanmay Mukhopadhyay      |            |
| Preston        | Royal Preston Hospital              | Win Soe                  |            |
| Preston        | Royal Preston Hospital              | Claire Corless           |            |
| Preston        | Royal Preston Hospital              | Rebecca Wilby (nee Hall) |            |
| Preston        | Royal Preston Hospital              | Rose Ellard              |            |
| Preston        | Royal Preston Hospital              | Sarah Preston            |            |
| Preston        | Royal Preston Hospital              | Margaret Brunton         |            |
| Preston        | Royal Preston Hospital              | Andrew Martyniak         |            |
| Preston        | Royal Preston Hospital              | Davide Garau             |            |
| Preston        | Royal Preston Hospital              | Dominic Mounsey          |            |
| Preston        | Royal Preston Hospital              | Billy Hefferon           |            |
| Preston        | Royal Preston Hospital              | David Barber             | Pharmacist |
| Preston        | Royal Preston Hospital              | Hemant Patel             |            |
| Preston        | Royal Preston Hospital              | Roy Shentall             |            |
| Preston        | Royal Preston Hospital              | Cassandra Gleeson        |            |

|         |                          |                        |            |
|---------|--------------------------|------------------------|------------|
| Preston | Royal Preston Hospital   | Deborah Weavers        |            |
| Preston | Royal Preston Hospital   | Haiyan Huang           |            |
| Preston | Royal Preston Hospital   | Mandy Armstrong        |            |
| Preston | Royal Preston Hospital   | Nafisa Arden           |            |
| Preston | Royal Preston Hospital   | Sharon Curran          |            |
| Preston | Royal Preston Hospital   | Shelia Calvert         |            |
| Preston | Royal Preston Hospital   | Andrea Ashton          |            |
| Preston | Royal Preston Hospital   | Louise Hough           | Pharmacist |
| Preston | Royal Preston Hospital   | Catherine Walmsley     |            |
| Preston | Royal Preston Hospital   | Christina Robinson     |            |
| Preston | Royal Preston Hospital   | Deepsi Khatiwada       |            |
| Preston | Royal Preston Hospital   | Hazel Preston          |            |
| Preston | Royal Preston Hospital   | Amanda Alty            |            |
| Preston | Royal Preston Hospital   | Caroline Hatch         |            |
| Preston | Royal Preston Hospital   | Claire Hennigan        |            |
| Preston | Burnley General Hospital | Helen Spickett         |            |
| Preston | Royal Blackburn Hospital | Helen Spickett         |            |
| Preston | Royal Preston Hospital   | Katherine Ashton       |            |
| Preston | Royal Preston Hospital   | Nina Vekaria           |            |
| Preston | Royal Preston Hospital   | Patricia Knight        |            |
| Preston | Royal Preston Hospital   | Stephanie Cornthwaite  |            |
| Reading | Royal Berkshire Hospital | Elizabeth Haydon       |            |
| Reading | Royal Berkshire Hospital | Emilia Bruton          | Co-I       |
| Reading | Royal Berkshire Hospital | Gagan Bhatnagar        |            |
| Reading | Royal Berkshire Hospital | Nicola Dallas          |            |
| Reading | Royal Berkshire Hospital | Osamah Alasadi         |            |
| Reading | Royal Berkshire Hospital | Osamah Al-Asadi        | Co-I       |
| Reading | Royal Berkshire Hospital | Phillip Webb           |            |
| Reading | Royal Berkshire Hospital | Phillipa Johnstone     |            |
| Reading | Royal Berkshire Hospital | Rowena Cazalet         | Co-I       |
| Reading | Royal Berkshire Hospital | Silke Hahnwald         |            |
| Reading | Royal Berkshire Hospital | Abdolnasser Aminiraouf |            |
| Reading | Royal Berkshire Hospital | Ali Abbas              |            |
| Reading | Royal Berkshire Hospital | Georges Sinclair       |            |

|         |                          |                             |            |
|---------|--------------------------|-----------------------------|------------|
| Reading | Royal Berkshire Hospital | Helen O'Donnell             |            |
| Reading | Royal Berkshire Hospital | Paul Rogers                 | PI         |
| Reading | Royal Berkshire Hospital | Rebecca Johnson             | Co-I       |
| Reading | Royal Berkshire Hospital | Rebecca Varatharajah        | Co-I       |
| Reading | Royal Berkshire Hospital | Richard B Brown             |            |
| Reading | Royal Berkshire Hospital | Robert Jones                |            |
| Reading | Royal Berkshire Hospital | Sean O'Cathail              |            |
| Reading | Royal Berkshire Hospital | Shawn Ellis                 |            |
| Reading | Royal Berkshire Hospital | Simon Wyatt                 |            |
| Reading | Royal Berkshire Hospital | Stephen Parr                |            |
| Reading | Royal Berkshire Hospital | James Church                |            |
| Reading | Royal Berkshire Hospital | Steven Gulliver             |            |
| Reading | Royal Berkshire Hospital | Thomas Kindley              |            |
| Reading | Royal Berkshire Hospital | Geraldine Mason             | Pharmacist |
| Reading | Royal Berkshire Hospital | Kate Preston                |            |
| Reading | Royal Berkshire Hospital | Nicole Gould                |            |
| Reading | Royal Berkshire Hospital | Wioletta Kowalczyk-Williams |            |
| Reading | Royal Berkshire Hospital | Christina Lewis             |            |
| Reading | Royal Berkshire Hospital | Pooja Pabari                |            |
| Reading | Royal Berkshire Hospital | Royda Hadi                  |            |
| Reading | Royal Berkshire Hospital | Andreia da Cruz             |            |
| Reading | Royal Berkshire Hospital | Anna Gillham                |            |
| Reading | Royal Berkshire Hospital | Claire Connolly             |            |
| Reading | Royal Berkshire Hospital | Emma Vowell                 |            |
| Reading | Royal Berkshire Hospital | Jo Hand                     |            |
| Reading | Royal Berkshire Hospital | Maxine Gauntlett            |            |
| Reading | Royal Berkshire Hospital | Omotola Ogunnigbo           | Pharmacist |
| Reading | Royal Berkshire Hospital | Sanita Gurm                 |            |
| Reading | Royal Berkshire Hospital | Allison Hunt                |            |
| Reading | Royal Berkshire Hospital | Catherine Deytrikh-Smith    |            |
| Reading | Royal Berkshire Hospital | Debbie Cartwright           |            |
| Reading | Royal Berkshire Hospital | Fiona Everson               |            |
| Reading | Royal Berkshire Hospital | Gabrielle Ball              |            |
| Reading | Royal Berkshire Hospital | Helen Purdon                |            |

|          |                          |                          |            |
|----------|--------------------------|--------------------------|------------|
| Reading  | Royal Berkshire Hospital | Jane Atkinson            |            |
| Reading  | Royal Berkshire Hospital | Juliette Dye             |            |
| Reading  | Royal Berkshire Hospital | Kirsty Horwood           | Pharmacist |
| Reading  | Royal Berkshire Hospital | Kristy Coomber           |            |
| Reading  | Royal Berkshire Hospital | Maryam Amole             |            |
| Reading  | Royal Berkshire Hospital | Norma Shields            | Pharmacist |
| Reading  | Royal Berkshire Hospital | Sian James               |            |
| Reading  | Royal Berkshire Hospital | Suzanne Foxwell          |            |
| Reading  | Royal Berkshire Hospital | Tolu Okeke               |            |
| Redditch | Alexandra Hospital       | Ayyaz Munawar            | Co-I       |
| Redditch | Alexandra Hospital       | Bartlomeij Kurec         |            |
| Redditch | Alexandra Hospital       | Menna Fonda              | Co-I       |
| Redditch | Alexandra Hospital       | Mujtaba Syed-Khaja       | Co-I       |
| Redditch | Alexandra Hospital       | Nge Nge Thida            | Co-I       |
| Redditch | Alexandra Hospital       | Asha Sivapalasantharam   |            |
| Redditch | Alexandra Hospital       | James Best               | Co-I       |
| Redditch | Alexandra Hospital       | Joanna Hamilton          |            |
| Redditch | Alexandra Hospital       | Lisa Capaldi             | PI         |
| Redditch | Alexandra Hospital       | Paul Flinders            |            |
| Redditch | Alexandra Hospital       | Sabihya Wontumi          | Co-I       |
| Redditch | Alexandra Hospital       | Thakshayini Shanthakumar | Co-I       |
| Redditch | Alexandra Hospital       | Jacob Taylor             |            |
| Redditch | Alexandra Hospital       | Jonathan Davies          |            |
| Redditch | Alexandra Hospital       | Alison Harrison          |            |
| Redditch | Alexandra Hospital       | Amanda Holdsworth        |            |
| Redditch | Alexandra Hospital       | Ann White                |            |
| Redditch | Alexandra Hospital       | Jayna Thakrar            |            |
| Redditch | Alexandra Hospital       | Veronica Rowlands        |            |
| Redditch | Alexandra Hospital       | Hayley Hodson            |            |
| Redditch | Alexandra Hospital       | Helen Tranter            |            |
| Redditch | Alexandra Hospital       | Maggie Brown             |            |
| Redditch | Alexandra Hospital       | Stephanie Cook           | Pharmacist |
| Redditch | Alexandra Hospital       | Jennifer Young           | Pharmacist |
| Redditch | Alexandra Hospital       | Jeanette Knapp           |            |

|         |                            |                            |            |
|---------|----------------------------|----------------------------|------------|
| Redhill | East Surrey Hospital       | Eva Letalova               |            |
| Romford | Queen's Hospital (Romford) | Alexander Pawsey           | Co-I       |
| Romford | Queen's Hospital (Romford) | Danny Koroma Koroma        |            |
| Romford | Queen's Hospital (Romford) | Kathryn Tarver             | PI         |
| Romford | Queen's Hospital (Romford) | Maria Martinou             | PI         |
| Romford | Queen's Hospital (Romford) | Jonathon Shamash           |            |
| Romford | Queen's Hospital (Romford) | Ramachandran Subramaniam   |            |
| Romford | Queen's Hospital (Romford) | Stephanie Gibbs            | PI         |
| Romford | Queen's Hospital (Romford) | Thi Vu                     |            |
| Romford | Queen's Hospital (Romford) | Mohammed Rashid Khan       |            |
| Romford | Queen's Hospital (Romford) | Revanth Jannapureddy       |            |
| Romford | Queen's Hospital (Romford) | Samuel Mugari              |            |
| Romford | Queen's Hospital (Romford) | Simerjyot Mudhar           |            |
| Romford | Queen's Hospital (Romford) | Neale O'Brien              |            |
| Romford | Oldchurch Hospital         | Neil Fisher                |            |
| Romford | Queen's Hospital (Romford) | Yousaf Razzak              |            |
| Romford | Queen's Hospital (Romford) | Parveen Dugh               | Pharmacist |
| Romford | Queen's Hospital (Romford) | Amani Chowdhury            |            |
| Romford | Queen's Hospital (Romford) | Mariha Khalid              |            |
| Romford | Queen's Hospital (Romford) | Ana-Marie Pena-Remorin     |            |
| Romford | Queen's Hospital (Romford) | Dalisay Domingo            |            |
| Romford | Queen's Hospital (Romford) | Helen Mackenzie            |            |
| Romford | Queen's Hospital (Romford) | Tina Mills-Baldock         |            |
| Runcorn | Warrington Hospital        | Isabel Syndikus            | PI         |
| Runcorn | Warrington Hospital        | Shaun Tolan                | Co-I       |
| Runcorn | Halton Hospital            | Duncan Knowles             |            |
| Runcorn | Halton Hospital            | Ian Allen                  |            |
| Runcorn | Halton Hospital            | Andrea Young               |            |
| Runcorn | Halton Hospital            | Rebecca Madew (nee Tinker) |            |
| Runcorn | Halton Hospital            | Nemonie Marriott           |            |
| Salford | Salford Royal Hospital     | Nicholas Boxall            |            |
| Salford | Salford Royal Hospital     | Anna Tran                  | Co-I       |
| Salford | Salford Royal Hospital     | Richard Cowan              |            |
| Salford | Salford Royal Hospital     | Danielle Platt             |            |



|         |                        |                             |            |
|---------|------------------------|-----------------------------|------------|
| Salford | Salford Royal Hospital | Elina Jose                  |            |
| Salford | Salford Royal Hospital | Joanne Henry                |            |
| Salford | Salford Royal Hospital | Kay Goulden                 |            |
| Salford | Salford Royal Hospital | Euan Green                  | Co-I       |
| Salford | Salford Royal Hospital | Maurice Lau                 | Co-I       |
| Salford | Salford Royal Hospital | Oliver Wadsworth            |            |
| Salford | Salford Royal Hospital | Tony Elliott                | Co-I       |
| Salford | Salford Royal Hospital | Chris Betts                 |            |
| Salford | Salford Royal Hospital | David Shackley              |            |
| Salford | Salford Royal Hospital | Jason Howard                | Pharmacist |
| Salford | Salford Royal Hospital | Kieran O'Flynn              |            |
| Salford | Salford Royal Hospital | Mark Stapleton              |            |
| Salford | Salford Royal Hospital | Richard Jones               |            |
| Salford | Salford Royal Hospital | Christine Farnworth         |            |
| Salford | Salford Royal Hospital | Claire Duncan (nee Keatley) | Pharmacist |
| Salford | Salford Royal Hospital | Claire Keatley              |            |
| Salford | Salford Royal Hospital | Kathryn Cawley              |            |
| Salford | Salford Royal Hospital | Siny George                 |            |
| Salford | Salford Royal Hospital | Cellins Vinod               |            |
| Salford | Salford Royal Hospital | Claire Dickson              |            |
| Salford | Salford Royal Hospital | Helen Farrell               |            |
| Salford | Salford Royal Hospital | Samia Hanif                 |            |
| Salford | Salford Royal Hospital | Soney Dharmaprasad          |            |
| Salford | Salford Royal Hospital | Angela Ashton               |            |
| Salford | Salford Royal Hospital | Anne-Marie Peers            | Pharmacist |
| Salford | Salford Royal Hospital | Ashley Harris               | Pharmacist |
| Salford | Salford Royal Hospital | Catherine Redshaw           |            |
| Salford | Salford Royal Hospital | Jean Jellicoe               |            |
| Salford | Salford Royal Hospital | Kathryn Fry                 |            |
| Salford | Salford Royal Hospital | Leah Harter                 |            |
| Salford | Salford Royal Hospital | Rachael Allen               |            |
| Salford | Salford Royal Hospital | Vicky Thomas                |            |
| Salford | Salford Royal Hospital | Noel Clarke                 | PI         |
| Salford | Salford Royal Hospital | Jill Youd                   |            |

|             |                              |                      |            |
|-------------|------------------------------|----------------------|------------|
| Salford     | Salford Royal Hospital       | Melanie Taylor       |            |
| Salford     | Salford Royal Hospital       | Sarah Kirk           |            |
| Scarborough | Scarborough General Hospital | Ian Renwick          |            |
| Scarborough | Scarborough General Hospital | Khaliq Rehman        | Co-I       |
| Scarborough | Scarborough General Hospital | Laith Alsaket        |            |
| Scarborough | Scarborough General Hospital | Mohan Hingorani      | PI         |
| Scarborough | Scarborough General Hospital | Nabil El-Mahdawi     |            |
| Scarborough | Scarborough General Hospital | Mohammad Muneeb Khan | PI         |
| Scarborough | Scarborough General Hospital | Richard Khafagy      |            |
| Scarborough | Scarborough General Hospital | Russell Morgan       |            |
| Scarborough | Scarborough General Hospital | Abigail Rowbotham    |            |
| Scarborough | Scarborough General Hospital | Caroline Savage      |            |
| Scarborough | Scarborough General Hospital | Diana Ionita         |            |
| Scarborough | Scarborough General Hospital | Fizzah Asif          |            |
| Scarborough | Scarborough General Hospital | Lydia Kerr           |            |
| Scarborough | Scarborough General Hospital | Poppy Cottrell-Howe  | Pharmacist |
| Scarborough | Scarborough General Hospital | Courtney Cole        |            |
| Scarborough | Scarborough General Hospital | Donna Anderson       |            |
| Scarborough | Scarborough General Hospital | Rachel Spooner       |            |
| Scarborough | Scarborough General Hospital | Callum Childs        |            |
| Scarborough | Scarborough General Hospital | Dominic Burns        |            |
| Scarborough | Scarborough General Hospital | Andrew Robertson     |            |
| Scarborough | Scarborough General Hospital | Arran Fletcher       |            |
| Scarborough | Scarborough General Hospital | Jordan Toohie        |            |
| Scarborough | Scarborough General Hospital | Kevin Brame          |            |
| Scarborough | Scarborough General Hospital | Paul Wood            | Pharmacist |
| Scarborough | Scarborough General Hospital | Simon Hawkyard       | Co-I       |
| Scarborough | Scarborough General Hospital | Jacqui Smith         |            |
| Scarborough | Scarborough General Hospital | Lisa Armitage        |            |
| Scarborough | Scarborough General Hospital | Samantha Stead       |            |
| Scarborough | Scarborough General Hospital | Tania Neale          |            |
| Scarborough | Scarborough General Hospital | Tanya Hartley        |            |
| Scarborough | Scarborough General Hospital | Alison Ames          |            |
| Scarborough | Scarborough General Hospital | Alison Turnbull      |            |

|             |                              |                        |            |
|-------------|------------------------------|------------------------|------------|
| Scarborough | Scarborough General Hospital | Anne Nunn              |            |
| Scarborough | Scarborough General Hospital | Joanne Fletcher        |            |
| Scarborough | Scarborough General Hospital | Rachel Harrison        |            |
| Scarborough | Scarborough General Hospital | Sacha Honour           | Pharmacist |
| Scarborough | Scarborough General Hospital | Adnan Kabir            |            |
| Scarborough | Scarborough General Hospital | Alicia Rodgers         |            |
| Scarborough | Scarborough General Hospital | Janine Mallinson       |            |
| Scarborough | Scarborough General Hospital | Laura Barman           |            |
| Scarborough | Scarborough General Hospital | Pippa Carlton-Rylance  |            |
| Scarborough | Scarborough General Hospital | Polly Needs            |            |
| Scarborough | Scarborough General Hospital | Amie Stewart           |            |
| Scarborough | Scarborough General Hospital | Carol Popplestone      |            |
| Scarborough | Scarborough General Hospital | Cheryl Donne           | Pharmacist |
| Scarborough | Scarborough General Hospital | Chloe Box              | Pharmacist |
| Scarborough | Scarborough General Hospital | Jane Taylor            | Pharmacist |
| Scarborough | Scarborough General Hospital | Sarah Kent             |            |
| Scarborough | Scarborough General Hospital | Tracey Hawkes          |            |
| Scarborough | Scarborough General Hospital | Vic Gacek              |            |
| Sheffield   | Weston Park Hospital         | Lucy Walkington        |            |
| Sheffield   | Doncaster Royal Infirmary    | Mymoona Alzouebi       |            |
| Sheffield   | Weston Park Hospital         | Mymoona Alzouebi       |            |
| Sheffield   | Weston Park Hospital         | Prashanth Sanganalmath |            |
| Sheffield   | Weston Park Hospital         | Roseleen Sheehan       |            |
| Sheffield   | Weston Park Hospital         | Shabbir Rawther        | Co-I       |
| Sheffield   | Weston Park Hospital         | Tathagata Das          |            |
| Sheffield   | Weston Park Hospital         | Virgil Sivoglo         | Co-I       |
| Sheffield   | Weston Park Hospital         | Carmel Pezaro          | PI         |
| Sheffield   | Weston Park Hospital         | Catherine Ferguson     |            |
| Sheffield   | Weston Park Hospital         | James Lester           |            |
| Sheffield   | Weston Park Hospital         | Janet Brown            |            |
| Sheffield   | Weston Park Hospital         | Katie Bowen            |            |
| Sheffield   | Weston Park Hospital         | Linda Evans            |            |
| Sheffield   | Weston Park Hospital         | Louise Murray          |            |
| Sheffield   | Weston Park Hospital         | Omar Din               | PI         |

|           |                           |                             |            |
|-----------|---------------------------|-----------------------------|------------|
| Sheffield | Weston Park Hospital      | Peter Kirkbride             |            |
| Sheffield | Weston Park Hospital      | Chloe Clegg                 |            |
| Sheffield | Weston Park Hospital      | Georgia Douglas             |            |
| Sheffield | Weston Park Hospital      | Jessica Medcalf             |            |
| Sheffield | Weston Park Hospital      | Rebecca Lomax-Allen         |            |
| Sheffield | Weston Park Hospital      | Steffy George               |            |
| Sheffield | Weston Park Hospital      | Alexandra Firth             |            |
| Sheffield | Weston Park Hospital      | Cyper Allan                 |            |
| Sheffield | Weston Park Hospital      | Ryan Asher                  |            |
| Sheffield | Weston Park Hospital      | Ryan Davies                 |            |
| Sheffield | Weston Park Hospital      | John Martindale             |            |
| Sheffield | Doncaster Royal Infirmary | Mark Holliday               |            |
| Sheffield | Weston Park Hospital      | Mark Holliday               |            |
| Sheffield | Weston Park Hospital      | Richard Brown               |            |
| Sheffield | Weston Park Hospital      | Roger Burkinshaw            |            |
| Sheffield | Weston Park Hospital      | Anne Smythe                 |            |
| Sheffield | Weston Park Hospital      | Eileen Marsh                |            |
| Sheffield | Weston Park Hospital      | Gemma Dale                  |            |
| Sheffield | Weston Park Hospital      | Janine Smedley (nee McCabe) |            |
| Sheffield | Weston Park Hospital      | Julia Disney                | Pharmacist |
| Sheffield | Weston Park Hospital      | Kate Gibbins                |            |
| Sheffield | Weston Park Hospital      | Jess Aldred                 |            |
| Sheffield | Weston Park Hospital      | Leigh Fiorentino            |            |
| Sheffield | Weston Park Hospital      | Lucy Birch                  |            |
| Sheffield | Weston Park Hospital      | Ruta Segamogaite            |            |
| Sheffield | Weston Park Hospital      | Catherine Spalton           |            |
| Sheffield | Weston Park Hospital      | Elizabeth Hodgkinson        | Pharmacist |
| Sheffield | Weston Park Hospital      | Joanne Bird                 |            |
| Sheffield | Weston Park Hospital      | Katherine Williams          |            |
| Sheffield | Weston Park Hospital      | Lucy Smith                  |            |
| Sheffield | Weston Park Hospital      | Lynne Ashmore               |            |
| Sheffield | Weston Park Hospital      | Marion Hutchinson           | Pharmacist |
| Sheffield | Weston Park Hospital      | Rachel Toes                 |            |
| Sheffield | Weston Park Hospital      | Sarah Brown                 |            |

|            |                           |                   |      |
|------------|---------------------------|-------------------|------|
| Sheffield  | Weston Park Hospital      | Susan Bishop      |      |
| Sheffield  | Weston Park Hospital      | Kim Wood          |      |
| Shrewsbury | Royal Shrewsbury Hospital | Gemma Searle      |      |
| Shrewsbury | Royal Shrewsbury Hospital | Shazad Aslam      |      |
| Shrewsbury | Royal Shrewsbury Hospital | Abel Zachariah    |      |
| Shrewsbury | Royal Shrewsbury Hospital | Aitzaz Qaisar     |      |
| Shrewsbury | Royal Shrewsbury Hospital | Beshar Allos      |      |
| Shrewsbury | Royal Shrewsbury Hospital | Erica Beaumont    |      |
| Shrewsbury | Royal Shrewsbury Hospital | Huzeifa Abdel     |      |
| Shrewsbury | Royal Shrewsbury Hospital | Huzeifa Gadir     |      |
| Shrewsbury | Royal Shrewsbury Hospital | James Best        |      |
| Shrewsbury | Royal Shrewsbury Hospital | Lisa Capaldi      |      |
| Shrewsbury | Royal Shrewsbury Hospital | Lucy Pennant      |      |
| Shrewsbury | Royal Shrewsbury Hospital | Mathai Varghese   |      |
| Shrewsbury | Royal Shrewsbury Hospital | Narayanan Srihari | PI   |
| Shrewsbury | Royal Shrewsbury Hospital | Qamar Ghafoor     |      |
| Shrewsbury | Royal Shrewsbury Hospital | Rajanee Bhana     |      |
| Shrewsbury | Royal Shrewsbury Hospital | Sundus Yahya      |      |
| Shrewsbury | Royal Shrewsbury Hospital | Alison Tilley     |      |
| Shrewsbury | Royal Shrewsbury Hospital | Anna Law          |      |
| Shrewsbury | Royal Shrewsbury Hospital | Danielle Childs   |      |
| Shrewsbury | Royal Shrewsbury Hospital | Danielle Childs   |      |
| Shrewsbury | Royal Shrewsbury Hospital | Gemma Lee         |      |
| Shrewsbury | Royal Shrewsbury Hospital | Jenny Simm        |      |
| Shrewsbury | Royal Shrewsbury Hospital | Lisa Evans        |      |
| Shrewsbury | Royal Shrewsbury Hospital | Nicola Henderson  |      |
| Shrewsbury | Royal Shrewsbury Hospital | Riquella Abbott   |      |
| Shrewsbury | Royal Shrewsbury Hospital | Suzanne Pope      |      |
| Shrewsbury | Royal Shrewsbury Hospital | Andy Taylor       |      |
| Shrewsbury | Royal Shrewsbury Hospital | Michael Leigh     |      |
| Shrewsbury | Royal Shrewsbury Hospital | Ravi Prashant     | Co-I |
| Shrewsbury | Royal Shrewsbury Hospital | Craig Pickering   |      |
| Shrewsbury | Royal Shrewsbury Hospital | Sanal Jose        |      |
| Shrewsbury | Royal Shrewsbury Hospital | Emma Weaver       |      |

|               |                                  |                         |            |
|---------------|----------------------------------|-------------------------|------------|
| Shrewsbury    | Royal Shrewsbury Hospital        | Mandy Beekes            |            |
| Shrewsbury    | Royal Shrewsbury Hospital        | Natasha Wallbank        |            |
| Shrewsbury    | Royal Shrewsbury Hospital        | Rachel McGregor         |            |
| Shrewsbury    | Royal Shrewsbury Hospital        | Gill Ferguson           | Pharmacist |
| Shrewsbury    | Royal Shrewsbury Hospital        | Harpreet Singh          |            |
| Shrewsbury    | Royal Shrewsbury Hospital        | Hayley Hughes           |            |
| Shrewsbury    | Royal Shrewsbury Hospital        | Sandra Smith            |            |
| Shrewsbury    | Royal Shrewsbury Hospital        | Sunita Kurian-Downer    |            |
| Shrewsbury    | Royal Shrewsbury Hospital        | Indukala Chennattukungu |            |
| Shrewsbury    | Royal Shrewsbury Hospital        | Jenny Lakin             |            |
| Shrewsbury    | Royal Shrewsbury Hospital        | Angela Yeomans          | Pharmacist |
| Shrewsbury    | Royal Shrewsbury Hospital        | Catherine Santiago      |            |
| Shrewsbury    | Royal Shrewsbury Hospital        | Elena Michael           |            |
| Shrewsbury    | Royal Shrewsbury Hospital        | Karen Nicholas          |            |
| Shrewsbury    | Royal Shrewsbury Hospital        | Mandy Bates             |            |
| Shrewsbury    | Royal Shrewsbury Hospital        | Nicola Jones            |            |
| Shrewsbury    | Royal Shrewsbury Hospital        | Rebecca Wilcox          |            |
| Shrewsbury    | Royal Shrewsbury Hospital        | Renee Poulson           | Pharmacist |
| Shrewsbury    | Royal Shrewsbury Hospital        | Sally Potts             |            |
| Shrewsbury    | Royal Shrewsbury Hospital        | Siobhan Kilbane         |            |
| Shrewsbury    | Royal Shrewsbury Hospital        | Verity King             |            |
| Shrewsbury    | Royal Shrewsbury Hospital        | Catherine Orrell        |            |
| Shrewsbury    | Royal Shrewsbury Hospital        | Emma Neeves             |            |
| Shrewsbury    | Royal Shrewsbury Hospital        | Helen Moore             |            |
| Shrewsbury    | Royal Shrewsbury Hospital        | Marion Adams            |            |
| South Shields | South Tyneside District Hospital | Ashraf Azzabi           | PI         |
| South Shields | South Tyneside District Hospital | Sally Hall              |            |
| South Shields | South Tyneside District Hospital | Judith Mckenna          |            |
| South Shields | South Tyneside District Hospital | Amy Burns               |            |
| South Shields | South Tyneside District Hospital | Jessica De Sousa        |            |
| South Shields | South Tyneside District Hospital | Judith Moore            |            |
| South Shields | South Tyneside District Hospital | Sue Morrison            |            |
| South Shields | South Tyneside District Hospital | Maxine Turner           | Pharmacist |
| Southampton   | Southampton General Hospital     | Caroline Chan           |            |

|             |                              |                     |            |
|-------------|------------------------------|---------------------|------------|
| Southampton | Southampton General Hospital | Caroline Chau       |            |
| Southampton | Southampton General Hospital | Chloe Holden        | Co-I       |
| Southampton | Southampton General Hospital | Chris Coyle         |            |
| Southampton | Southampton General Hospital | Emma Brown          | Co-I       |
| Southampton | Southampton General Hospital | Kim Teasdale        | Co-I       |
| Southampton | Southampton General Hospital | Matthew Wheeler     |            |
| Southampton | Southampton General Hospital | Robert Kemp         |            |
| Southampton | Southampton General Hospital | Simon Crabb         | PI         |
| Southampton | Southampton General Hospital | Tessa Greenhalgh    | Co-I       |
| Southampton | Southampton General Hospital | Catherine Heath     |            |
| Southampton | Southampton General Hospital | Graham Mead         |            |
| Southampton | Southampton General Hospital | Harish Reddy        | Co-I       |
| Southampton | Southampton General Hospital | Victoria McFarlane  |            |
| Southampton | Southampton General Hospital | Ivanila Atauasova   | Pharmacist |
| Southampton | Southampton General Hospital | Anna Sieradzka      |            |
| Southampton | Southampton General Hospital | Anna Stephenson     |            |
| Southampton | Southampton General Hospital | Nithya Raj          |            |
| Southampton | Southampton General Hospital | Rajitha Kamalakshan |            |
| Southampton | Southampton General Hospital | Rebecca Rice        |            |
| Southampton | Southampton General Hospital | Adele Ruiz          |            |
| Southampton | Southampton General Hospital | Julie Kennedy       |            |
| Southampton | Southampton General Hospital | Susan Morton        |            |
| Southampton | Southampton General Hospital | Aneta Zahorska      |            |
| Southampton | Southampton General Hospital | Annelise Haskell    |            |
| Southampton | Southampton General Hospital | Archana Gadve       |            |
| Southampton | Southampton General Hospital | Caroline Andrews    |            |
| Southampton | Southampton General Hospital | Carolyn Mitchell    | Pharmacist |
| Southampton | Southampton General Hospital | Deborah Scott       |            |
| Southampton | Southampton General Hospital | Holly Burton        | Pharmacist |
| Southampton | Southampton General Hospital | Leanne Reader       |            |
| Southampton | Southampton General Hospital | Liane Armstrong     |            |
| Southampton | Southampton General Hospital | Lucy Galloway       |            |
| Southampton | Southampton General Hospital | Maureen McAuley     | Pharmacist |
| Southampton | Southampton General Hospital | Nikki Carney        |            |

|             |                                                |                         |            |
|-------------|------------------------------------------------|-------------------------|------------|
| Southampton | Southampton General Hospital                   | Nikki Prewitt           |            |
| Southampton | Southampton General Hospital                   | Oyeleye Oyebola         |            |
| Southampton | Southampton General Hospital                   | Sarah Oliver            |            |
| Southampton | Southampton General Hospital                   | Sau-Mon Tsang           | Pharmacist |
| Southampton | Southampton General Hospital                   | Yanli Li                |            |
| Southampton | Southampton General Hospital                   | Carina Mundy            |            |
| Southampton | Southampton General Hospital                   | Donna Kimber            | Pharmacist |
| Southampton | Southampton General Hospital                   | Fabiola Morales-Azofra  |            |
| Southampton | Southampton General Hospital                   | Julie Gwilt             |            |
| Southampton | Southampton General Hospital                   | Kirsty Cumming          |            |
| Southampton | Southampton General Hospital                   | Lorraine Street         |            |
| Southampton | Southampton General Hospital                   | Lucy Elswood            |            |
| Southampton | Southampton General Hospital                   | Shauna Wakefield        |            |
| Southport   | Southport and Formby District General Hospital | Manal Alameddine        | PI         |
| Southport   | Southport and Formby District General Hospital | Neeraj Bhalla           | PI         |
| Southport   | Southport and Formby District General Hospital | Asha Sivapalasantharam  |            |
| Southport   | Southport and Formby District General Hospital | Chinnamani Eswar        |            |
| Southport   | Southport and Formby District General Hospital | Margaret Brunton        |            |
| Southport   | Southport and Formby District General Hospital | Ken Gardner             |            |
| Southport   | Southport and Formby District General Hospital | Laurie Lomax            |            |
| Southport   | Southport and Formby District General Hospital | Ann Wearing             |            |
| Southport   | Southport and Formby District General Hospital | Dawn Barker             |            |
| Southport   | Southport and Formby District General Hospital | Marie McBride           |            |
| Southport   | Southport and Formby District General Hospital | Sandra Robinson         |            |
| Southport   | Southport and Formby District General Hospital | Anna Morris             |            |
| Southport   | Southport and Formby District General Hospital | Heidi Moran             |            |
| Southport   | Southport and Formby District General Hospital | Teresa Monahan          |            |
| Southport   | Southport and Formby District General Hospital | Angela Scullion         |            |
| Southport   | Southport and Formby District General Hospital | Lisa Dobson (nee Child) |            |
| Southport   | Southport and Formby District General Hospital | Linda Schinkel          |            |
| St Gallen   | Kantonsspital St Gallen                        | Aurelius Omlin          | Co-I       |
| St Gallen   | Kantonsspital St Gallen                        | Christoph Schwab        | Co-I       |
| St Gallen   | Kantonsspital St Gallen                        | Dominik Abt             |            |
| St Gallen   | Kantonsspital St Gallen                        | Christian Rothermundt   | Co-I       |



|                    |                         |                   |            |
|--------------------|-------------------------|-------------------|------------|
| St Gallen          | Kantonsspital St Gallen | Daniel Engeler    | PI         |
| St Gallen          | Kantonsspital St Gallen | Mannel Jungi      |            |
| St Gallen          | Kantonsspital St Gallen | Silke Gillissen   |            |
| St Gallen          | Kantonsspital St Gallen | Stefan Prensser   |            |
| St Gallen          | Kantonsspital St Gallen | Sigrid Patel      |            |
| St Gallen          | Kantonsspital St Gallen | Eloise Kremer     |            |
| St Gallen          | Kantonsspital St Gallen | Karin Zuern       |            |
| St Gallen          | Kantonsspital St Gallen | Karin Zurn        |            |
| St Gallen          | Kantonsspital St Gallen | Claudia Hormann   |            |
| St Gallen          | Kantonsspital St Gallen | Sibylle Schapper  |            |
| St Leonards-on-Sea | Conquest Hospital       | Aspasia Soultati  |            |
| St Leonards-on-Sea | Conquest Hospital       | Fiona McKinna     |            |
| St Leonards-on-Sea | Conquest Hospital       | Kathryn Lees      |            |
| St Leonards-on-Sea | Conquest Hospital       | Sharon Beesley    |            |
| St Leonards-on-Sea | Conquest Hospital       | Claire Rutherford |            |
| St Leonards-on-Sea | Conquest Hospital       | Sarah Draper      |            |
| St Leonards-on-Sea | Conquest Hospital       | Mark Whitfield    | Pharmacist |
| St Leonards-on-Sea | Conquest Hospital       | Steve Garnett     |            |
| St Leonards-on-Sea | Conquest Hospital       | Gail Pottinger    |            |
| St Leonards-on-Sea | Conquest Hospital       | Jo-Anne Taylor    |            |
| St Leonards-on-Sea | Conquest Hospital       | Kay Jones-Skipper |            |
| St Leonards-on-Sea | Conquest Hospital       | Atikah Ayaz       |            |
| St Leonards-on-Sea | Conquest Hospital       | Lauren McCrisken  |            |
| St Leonards-on-Sea | Conquest Hospital       | Sarah Goodwin     |            |
| St Leonards-on-Sea | Conquest Hospital       | Theresa Baumber   |            |
| St Leonards-on-Sea | Conquest Hospital       | Joanna Howard     |            |
| St. Gallen         | Klinik fur Urologie     | Claudia Hormann   |            |
| St. Gallen         | Klinik fur Urologie     | Sibylle Schapper  |            |
| St.Leonards-on-Sea | Conquest Hospital       | Roger Plail       |            |
| Stevenage          | Lister Hospital         | Anna Anosova      |            |
| Stevenage          | Lister Hospital         | David Woolf       |            |
| Stevenage          | Lister Hospital         | Mawuelikem Assoku |            |
| Stevenage          | Lister Hospital         | Nikhil Oommen     |            |
| Stevenage          | Lister Hospital         | Alkhalidi Ashraf  |            |

|           |                        |                       |            |
|-----------|------------------------|-----------------------|------------|
| Stevenage | Lister Hospital        | David Ward            |            |
| Stevenage | Lister Hospital        | Jonathan Towler       |            |
| Stevenage | Lister Hospital        | Leena Mukherjee       |            |
| Stevenage | Lister Hospital        | Robert Hughes         | PI         |
| Stevenage | Lister Hospital        | Steven Watkins        |            |
| Stevenage | Lister Hospital        | Natalie Rahim         |            |
| Stevenage | Lister Hospital        | Sayyida Nembhard      |            |
| Stevenage | Lister Hospital        | Martin Ebon           |            |
| Stevenage | Lister Hospital        | Stephen Almond        |            |
| Stevenage | Lister Hospital        | Clare Collins         |            |
| Stevenage | Lister Hospital        | Jemma Gilmore         |            |
| Stevenage | Lister Hospital        | Sunita Gohil          |            |
| Stevenage | Lister Hospital        | Sura Dabbagh          | Pharmacist |
| Stevenage | Lister Hospital        | Alice Valle           |            |
| Stevenage | Lister Hospital        | Corinne Bradshaw      |            |
| Stevenage | Lister Hospital        | Elen Witness          |            |
| Stevenage | Lister Hospital        | Rhos Gabriel          |            |
| Stevenage | Lister Hospital        | Anita Rana            | Pharmacist |
| Stevenage | Lister Hospital        | Katie Poole           |            |
| Stevenage | Lister Hospital        | Roisin Schimmel       |            |
| Stevenage | Lister Hospital        | Vicky Hills           |            |
| Stockport | Stepping Hill Hospital | Carmel Anandadas      |            |
| Stockport | Stepping Hill Hospital | Satish Venkateshan    |            |
| Stockport | Stepping Hill Hospital | Umi Hatimy            |            |
| Stockport | Stepping Hill Hospital | Apurna Jegannathen    |            |
| Stockport | Stepping Hill Hospital | Catherine Coyle       |            |
| Stockport | Stepping Hill Hospital | John Logue            | PI         |
| Stockport | Stepping Hill Hospital | Abigail Mackley       |            |
| Stockport | Stepping Hill Hospital | Anna Kellingray       |            |
| Stockport | Stepping Hill Hospital | Oluwademilade Odewumi |            |
| Stockport | Stepping Hill Hospital | Sarah Smallwood       |            |
| Stockport | Stepping Hill Hospital | Aelens Brauckman      |            |
| Stockport | Stepping Hill Hospital | Benjamin Ralphs       |            |
| Stockport | Stepping Hill Hospital | Donald van Welsenens  |            |

|           |                        |                   |            |
|-----------|------------------------|-------------------|------------|
| Stockport | Stepping Hill Hospital | John Kilmartin    |            |
| Stockport | Stepping Hill Hospital | Jonathan Wong     | Pharmacist |
| Stockport | Stepping Hill Hospital | Paul Berry        |            |
| Stockport | Stepping Hill Hospital | Wasim Akhtar      |            |
| Stockport | Stepping Hill Hospital | Adebanji Adeyoju  |            |
| Stockport | Stepping Hill Hospital | Andrew Sinclair   |            |
| Stockport | Stepping Hill Hospital | David Ross        |            |
| Stockport | Stepping Hill Hospital | Gerald Collins    |            |
| Stockport | Stepping Hill Hospital | Patrick O'Reilly  |            |
| Stockport | Stepping Hill Hospital | Richard Brough    |            |
| Stockport | Stepping Hill Hospital | Stephen Bromage   |            |
| Stockport | Stepping Hill Hospital | Stephen CW Brown  |            |
| Stockport | Stepping Hill Hospital | Helen Haydock     |            |
| Stockport | Stepping Hill Hospital | Louise Brown      |            |
| Stockport | Stepping Hill Hospital | Susan Hopkins     |            |
| Stockport | Stepping Hill Hospital | Abigail Pemberton |            |
| Stockport | Stepping Hill Hospital | Alissa Kent       |            |
| Stockport | Stepping Hill Hospital | Emma Goodwin      |            |
| Stockport | Stepping Hill Hospital | Emma Taylor       |            |
| Stockport | Stepping Hill Hospital | Julie Melville    |            |
| Stockport | Stepping Hill Hospital | Katrina Wade      |            |
| Stockport | Stepping Hill Hospital | Lucy Orrell       | Pharmacist |
| Stockport | Stepping Hill Hospital | Magda Kujawa      |            |
| Stockport | Stepping Hill Hospital | Miriam Avery      |            |
| Stockport | Stepping Hill Hospital | Mkyla Reilly      |            |
| Stockport | Stepping Hill Hospital | Susan Graham      | Pharmacist |
| Stockport | Stepping Hill Hospital | Zoe Jordan        |            |
| Stockport | Stepping Hill Hospital | Catherine Fox     | Pharmacist |
| Stockport | Stepping Hill Hospital | Christina Gilmour |            |
| Stockport | Stepping Hill Hospital | Eleanor Anscombe  |            |
| Stockport | Stepping Hill Hospital | Emma Hewitt       | Pharmacist |
| Stockport | Stepping Hill Hospital | Jean Cheetham     |            |
| Stockport | Stepping Hill Hospital | Jill Taylor       |            |
| Stockport | Stepping Hill Hospital | Nicola Hermitage  |            |

|                  |                                   |                            |            |
|------------------|-----------------------------------|----------------------------|------------|
| Stockport        | Stepping Hill Hospital            | Pat Clitheroe              |            |
| Stockport        | Stepping Hill Hospital            | Sam Corcoran               |            |
| Stockport        | Stepping Hill Hospital            | Sarah Connolly nee McKenna |            |
| Stockport        | Stepping Hill Hospital            | Sheila Hodgkinson          |            |
| Stockport        | Stepping Hill Hospital            | Tracie Cocks               |            |
| Stockton on Tees | North Tees General Hospital       | Devadasan Shakespeare      |            |
| Stockton-on-Tees | University Hospital of North Tees | Abdul Mian                 |            |
| Stockton-on-Tees | University Hospital of North Tees | Darren Leaning             | PI         |
| Stockton-on-Tees | University Hospital of North Tees | Jenny Smith                |            |
| Stockton-on-Tees | University Hospital of North Tees | Devadasan Shakespeare      |            |
| Stockton-on-Tees | University Hospital of North Tees | Gaurav Kumar               |            |
| Stockton-on-Tees | University Hospital of North Tees | Gala Stancev Stevanovic    |            |
| Stockton-on-Tees | University Hospital of North Tees | Helen Wardle (nee Wilson)  |            |
| Stockton-on-Tees | University Hospital of North Tees | Moira Percival             |            |
| Stockton-on-Tees | University Hospital of North Tees | Andrew Sigsworth           |            |
| Stockton-on-Tees | University Hospital of North Tees | Bill Wetherill             | Pharmacist |
| Stockton-on-Tees | University Hospital of North Tees | Victor Palit               |            |
| Stockton-on-Tees | University Hospital of North Tees | Hyder Latif                |            |
| Stockton-on-Tees | University Hospital of North Tees | Helen Dunn (nee Carey)     | Pharmacist |
| Stockton-on-Tees | University Hospital of North Tees | Jeanette Naisbitt          |            |
| Stockton-on-Tees | University Hospital of North Tees | Pam Race                   |            |
| Stockton-on-Tees | University Hospital of North Tees | Sarah Pitcairn             |            |
| Stockton-on-Tees | University Hospital of North Tees | Alison Chilvers            |            |
| Stockton-on-Tees | University Hospital of North Tees | Leigh Pollard              |            |
| Stockton-on-Tees | University Hospital of North Tees | Emma Jameson               |            |
| Stockton-on-Tees | University Hospital of North Tees | Lynda Poole                |            |
| Stoke-on-Trent   | Royal Stoke University Hospital   | Sumera Butt                |            |
| Stoke-on-Trent   | Royal Stoke University Hospital   | Fawzi Adab                 |            |
| Stoke-on-Trent   | Royal Stoke University Hospital   | Rajanee Bhana              |            |
| Stoke-on-Trent   | Royal Stoke University Hospital   | Salil Vengalil             | PI         |
| Stoke-on-Trent   | Royal Stoke University Hospital   | Elizabeth Sellars          |            |
| Stoke-on-Trent   | Royal Stoke University Hospital   | Emma Jackson               |            |
| Stoke-on-Trent   | Royal Stoke University Hospital   | Christopher Luscombe       |            |
| Stoke-on-Trent   | Royal Stoke University Hospital   | Robert Green               |            |

|                |                                 |                      |            |
|----------------|---------------------------------|----------------------|------------|
| Stoke-on-Trent | Royal Stoke University Hospital | Liberty Verueco      |            |
| Stoke-on-Trent | Royal Stoke University Hospital | Sharon Rollison      |            |
| Stoke-on-Trent | Royal Stoke University Hospital | Alison Tute          | Pharmacist |
| Stoke-on-Trent | Royal Stoke University Hospital | Angela Peake         |            |
| Stoke-on-Trent | Royal Stoke University Hospital | Angela Ward          |            |
| Stoke-on-Trent | Royal Stoke University Hospital | Marion Evans         |            |
| Stoke-on-Trent | Royal Stoke University Hospital | Eden Ball            |            |
| Stoke-on-Trent | Royal Stoke University Hospital | Alison Myatt         |            |
| Stoke-on-Trent | Royal Stoke University Hospital | Elizabeth Williamson |            |
| Stoke-on-Trent | Royal Stoke University Hospital | Grace Gough          |            |
| Stoke-on-Trent | Royal Stoke University Hospital | Isabel Breeze        | Pharmacist |
| Stoke-on-Trent | Royal Stoke University Hospital | Julie Storer         |            |
| Stoke-on-Trent | Royal Stoke University Hospital | Katrina Parkinson    |            |
| Stoke-on-Trent | Royal Stoke University Hospital | Rowena Smith         |            |
| Sunderland     | Sunderland Royal Hospital       | Rachel Pearson       | Co-I       |
| Sunderland     | Sunderland Royal Hospital       | Shahid Iqbal         |            |
| Sunderland     | Sunderland Royal Hospital       | Ashraf Azzabi        | PI         |
| Sunderland     | Sunderland Royal Hospital       | Ian Pedley           | Co-I       |
| Sunderland     | Sunderland Royal Hospital       | Kathryn Wright       | Co-I       |
| Sunderland     | Sunderland Royal Hospital       | Stephen Laybourne    |            |
| Sunderland     | Sunderland Royal Hospital       | Rod Beard            | Pharmacist |
| Sunderland     | Sunderland Royal Hospital       | Stephen Butler       |            |
| Sunderland     | Sunderland Royal Hospital       | Amanda Howey         |            |
| Sunderland     | Sunderland Royal Hospital       | Fiona Wakinshaw      |            |
| Sunderland     | Sunderland Royal Hospital       | Jane Cole            |            |
| Sunderland     | Sunderland Royal Hospital       | Paula Newton         |            |
| Sunderland     | Sunderland Royal Hospital       | Terri Haldane        |            |
| Sunderland     | Sunderland Royal Hospital       | Christine Harle      |            |
| Sunderland     | Sunderland Royal Hospital       | Fiona Wakinshaw      |            |
| Sunderland     | Sunderland Royal Hospital       | Julia Scott          |            |
| Sunderland     | Sunderland Royal Hospital       | Karen Shield         | Pharmacist |
| Sunderland     | Sunderland Royal Hospital       | Michelle Edwards     | Pharmacist |
| Sunderland     | Sunderland Royal Hospital       | Vivienne Hullock     |            |
| Sutton         | Royal Marsden Hospital (Sutton) | Adham Hijab          |            |

|        |                                 |                     |            |
|--------|---------------------------------|---------------------|------------|
| Sutton | Royal Marsden Hospital (Sutton) | Alex Tan            |            |
| Sutton | Royal Marsden Hospital (Sutton) | Angela Pathmanathan | Co-I       |
| Sutton | Royal Marsden Hospital (Sutton) | Gerard McVey        |            |
| Sutton | Royal Marsden Hospital (Sutton) | Nora Sundahl        | Co-I       |
| Sutton | Royal Marsden Hospital (Sutton) | Susan Lalondrelle   |            |
| Sutton | Royal Marsden Hospital (Sutton) | Alison Tree         |            |
| Sutton | Royal Marsden Hospital (Sutton) | Chris Parker        | PI         |
| Sutton | Royal Marsden Hospital (Sutton) | Ray Shepherd        |            |
| Sutton | Royal Marsden Hospital (Sutton) | Robert Huddart      |            |
| Sutton | Royal Marsden Hospital (Sutton) | Rosalind Eeles      |            |
| Sutton | Royal Marsden Hospital (Sutton) | Vincent Khoo        |            |
| Sutton | Royal Marsden Hospital (Sutton) | Lucy Featherstone   | Pharmacist |
| Sutton | Royal Marsden Hospital (Sutton) | Victoria Sjolin     | Pharmacist |
| Sutton | Royal Marsden Hospital (Sutton) | Martha Bullimore    |            |
| Sutton | Royal Marsden Hospital (Sutton) | Alexander Macnab    |            |
| Sutton | Royal Marsden Hospital (Sutton) | Amir El Ghazal      |            |
| Sutton | Royal Marsden Hospital (Sutton) | Douglas Brand       | Co-I       |
| Sutton | Royal Marsden Hospital (Sutton) | Nick Hunnings       | Pharmacist |
| Sutton | Royal Marsden Hospital (Sutton) | Tiaan Jacobs        |            |
| Sutton | Royal Marsden Hospital (Sutton) | Ruth Woode-Amisshah |            |
| Sutton | Royal Marsden Hospital (Sutton) | Zaynah Gurreebun    |            |
| Sutton | Royal Marsden Hospital (Sutton) | Sally Moore         |            |
| Sutton | Royal Marsden Hospital (Sutton) | Annette Musallam    |            |
| Sutton | Royal Marsden Hospital (Sutton) | Claire Crowley      |            |
| Sutton | Royal Marsden Hospital (Sutton) | Helen Stidwell      |            |
| Sutton | Royal Marsden Hospital (Sutton) | Janine Flohr        |            |
| Sutton | Royal Marsden Hospital (Sutton) | Jenni Parmar        |            |
| Sutton | Royal Marsden Hospital (Sutton) | Kelly Jones         |            |
| Sutton | Royal Marsden Hospital (Sutton) | Kirsty Cuthbertson  |            |
| Sutton | Royal Marsden Hospital (Sutton) | Laura Hennelly      |            |
| Sutton | Royal Marsden Hospital (Sutton) | Rookmeen Alighan    |            |
| Sutton | Royal Marsden Hospital (Sutton) | Bernadette Johnson  |            |
| Sutton | Royal Marsden Hospital (Sutton) | Chloe McCormack     |            |
| Sutton | Royal Marsden Hospital (Sutton) | Fatima Ahmed        |            |

|                    |                                 |                     |            |
|--------------------|---------------------------------|---------------------|------------|
| Sutton             | Royal Marsden Hospital (Sutton) | Sue Cromarty        | Pharmacist |
| Sutton             | Royal Marsden Hospital (Sutton) | Alan Horwich        |            |
| Sutton             | Royal Marsden Hospital (Sutton) | David Dearnaley     |            |
| Sutton Coldfield   | Good Hope Hospital              | Mark O'Beirn        | Co-I       |
| Sutton Coldfield   | Good Hope Hospital              | Daniel Ford         | PI         |
| Sutton Coldfield   | Good Hope Hospital              | Lorna Swaddle       |            |
| Sutton Coldfield   | Good Hope Hospital              | Steve Hay           |            |
| Sutton Coldfield   | Good Hope Hospital              | Chen Bartlett       |            |
| Sutton Coldfield   | Good Hope Hospital              | James Whitehouse    |            |
| Sutton Coldfield   | Good Hope Hospital              | Helen Thomas        |            |
| Sutton Coldfield   | Good Hope Hospital              | Ellen Drew          |            |
| Sutton Coldfield   | Good Hope Hospital              | Ann Schumacher      |            |
| Sutton Coldfield   | Good Hope Hospital              | Arlene Oldan        |            |
| Sutton Coldfield   | Good Hope Hospital              | Beena Mistry        |            |
| Sutton Coldfield   | Good Hope Hospital              | Helen Taylor        |            |
| Sutton Coldfield   | Good Hope Hospital              | Janet Prentice      |            |
| Sutton Coldfield   | Good Hope Hospital              | Kamaldeep Ajimal    |            |
| Sutton Coldfield   | Good Hope Hospital              | Rachael O'Beney     |            |
| Sutton Coldfield   | Good Hope Hospital              | Sarah Rogers        |            |
| Sutton Coldfield   | Good Hope Hospital              | Shobit Baijal       |            |
| Sutton Coldfield   | Good Hope Hospital              | Sundip Sohanpal     |            |
| Sutton Coldfield   | Good Hope Hospital              | Alison Maidment     | Pharmacist |
| Sutton Coldfield   | Good Hope Hospital              | Katy Moore          | Pharmacist |
| Sutton Coldfield   | Good Hope Hospital              | Lubna Khan          |            |
| Sutton-in-Ashfield | King's Mill Hospital            | Andrew Brocklehurst |            |
| Sutton-in-Ashfield | King's Mill Hospital            | Elena Macleod       |            |
| Sutton-in-Ashfield | King's Mill Hospital            | Fiona Smith         |            |
| Sutton-in-Ashfield | King's Mill Hospital            | James Price         |            |
| Sutton-in-Ashfield | King's Mill Hospital            | Jun Lim             |            |
| Sutton-in-Ashfield | King's Mill Hospital            | Lauren Jones        |            |
| Sutton-in-Ashfield | King's Mill Hospital            | Michael Ocathail    |            |
| Sutton-in-Ashfield | King's Mill Hospital            | Muhammad Gill       |            |
| Sutton-in-Ashfield | King's Mill Hospital            | Robert Goldspring   |            |
| Sutton-in-Ashfield | King's Mill Hospital            | Sadia Abdullah      |            |

|                    |                      |                    |            |
|--------------------|----------------------|--------------------|------------|
| Sutton-in-Ashfield | King's Mill Hospital | Sarah Taylor       |            |
| Sutton-in-Ashfield | King's Mill Hospital | Wai Hou Sam        |            |
| Sutton-in-Ashfield | King's Mill Hospital | Benjamin Masters   | Co-I       |
| Sutton-in-Ashfield | King's Mill Hospital | Daniel Saunders    | PI         |
| Sutton-in-Ashfield | King's Mill Hospital | Eliot Chadwick     |            |
| Sutton-in-Ashfield | King's Mill Hospital | Georgina Walker    | PI         |
| Sutton-in-Ashfield | King's Mill Hospital | Louise Brookes     | Co-I       |
| Sutton-in-Ashfield | King's Mill Hospital | Andrea Palfreman   |            |
| Sutton-in-Ashfield | King's Mill Hospital | Jamie-Rae Burgoyne |            |
| Sutton-in-Ashfield | King's Mill Hospital | Lisa Rahn          |            |
| Sutton-in-Ashfield | King's Mill Hospital | Victoria Moore     |            |
| Sutton-in-Ashfield | King's Mill Hospital | Shila Hamzpur      |            |
| Sutton-in-Ashfield | King's Mill Hospital | Terri-Ann Sewell   |            |
| Sutton-in-Ashfield | King's Mill Hospital | Wayne Lovegrove    |            |
| Sutton-in-Ashfield | King's Mill Hospital | Dominic Nash       |            |
| Sutton-in-Ashfield | King's Mill Hospital | Steve Haigh        | Pharmacist |
| Sutton-in-Ashfield | King's Mill Hospital | Inez Wynter        |            |
| Sutton-in-Ashfield | King's Mill Hospital | Katie Slack        |            |
| Sutton-in-Ashfield | King's Mill Hospital | Sarah Shelton      |            |
| Sutton-in-Ashfield | King's Mill Hospital | Margaret Wheatley  |            |
| Sutton-in-Ashfield | King's Mill Hospital | Samantha Boam      |            |
| Sutton-in-Ashfield | King's Mill Hospital | Samantha March     | Pharmacist |
| Sutton-in-Ashfield | King's Mill Hospital | Linda Otter        | Pharmacist |
| Sutton-in-Ashfield | King's Mill Hospital | Lynne Wade         |            |
| Sutton-in-Ashfield | King's Mill Hospital | Rebecca Holmes     |            |
| Sutton-in-Ashfield | King's Mill Hospital | Susan Smith        |            |
| Swansea            | Singleton Hospital   | Ahmed Shaheen      | PI         |
| Swansea            | Singleton Hospital   | Aijaz Lone         | Co-I       |
| Swansea            | Singleton Hospital   | David Brown        |            |
| Swansea            | Singleton Hospital   | Delia Pudney       |            |
| Swansea            | Singleton Hospital   | Fiona Williams     | Co-I       |
| Swansea            | Singleton Hospital   | Helen Fitzgerald   | Co-I       |
| Swansea            | Singleton Hospital   | N Sindgi           |            |
| Swansea            | Singleton Hospital   | Nia Jackson        | Co-I       |



|         |                    |                      |            |
|---------|--------------------|----------------------|------------|
| Swansea | Singleton Hospital | Rhian Davies         | Co-I       |
| Swansea | Singleton Hospital | Ricky Fraser         |            |
| Swansea | Singleton Hospital | Russell Banner       |            |
| Swansea | Singleton Hospital | Sarah Gwynne         |            |
| Swansea | Singleton Hospital | Satish Kumar         |            |
| Swansea | Singleton Hospital | Sharath Gangadhara   |            |
| Swansea | Singleton Hospital | Sheena Lam           | Co-I       |
| Swansea | Singleton Hospital | Wael Mohamed         | Co-I       |
| Swansea | Singleton Hospital | Gianfilippo Bertelli |            |
| Swansea | Singleton Hospital | Jason Lester         |            |
| Swansea | Singleton Hospital | Mau-Don Phan         | Co-I       |
| Swansea | Singleton Hospital | Nicola Davies        |            |
| Swansea | Singleton Hospital | Angharad Phillips    |            |
| Swansea | Singleton Hospital | Anne Thomas          | Pharmacist |
| Swansea | Singleton Hospital | Bethan Williams      |            |
| Swansea | Singleton Hospital | Ellen Tait           |            |
| Swansea | Singleton Hospital | Karen Chesters       |            |
| Swansea | Singleton Hospital | Katie Tanner         |            |
| Swansea | Singleton Hospital | Naomi Woods          |            |
| Swansea | Singleton Hospital | Nicola Lemon         |            |
| Swansea | Singleton Hospital | Alex Richards        |            |
| Swansea | Singleton Hospital | Carl Ackland         |            |
| Swansea | Singleton Hospital | James Morgan         |            |
| Swansea | Singleton Hospital | Lewis Jones          |            |
| Swansea | Singleton Hospital | Mark Rogers          |            |
| Swansea | Singleton Hospital | Stuart Evans         | Pharmacist |
| Swansea | Singleton Hospital | Ashok Kumar          |            |
| Swansea | Singleton Hospital | Brian Phillips       |            |
| Swansea | Singleton Hospital | Euan Pratt           |            |
| Swansea | Singleton Hospital | Amanda Cook          |            |
| Swansea | Singleton Hospital | Charlotte Young      |            |
| Swansea | Singleton Hospital | Dawn Withers         |            |
| Swansea | Singleton Hospital | Gillian Palmer       |            |
| Swansea | Singleton Hospital | Gillian Willetts     |            |

|         |                        |                            |            |
|---------|------------------------|----------------------------|------------|
| Swansea | Singleton Hospital     | Helen Cheley               |            |
| Swansea | Singleton Hospital     | Lesley Richards            |            |
| Swansea | Singleton Hospital     | Lynne Breeze-Jones         |            |
| Swansea | Singleton Hospital     | Alex Franklin              |            |
| Swansea | Singleton Hospital     | Gillian Jones              | Pharmacist |
| Swansea | Singleton Hospital     | Karen Phillips             |            |
| Swansea | Singleton Hospital     | Mair Roberts               | Pharmacist |
| Swansea | Singleton Hospital     | Amy Quinton                |            |
| Swansea | Singleton Hospital     | Chelsea Jenkins            |            |
| Swansea | Singleton Hospital     | Elizabeth Evans            |            |
| Swansea | Singleton Hospital     | Emily Harris (n. Marchant) |            |
| Swansea | Singleton Hospital     | Emma Dangerfield           |            |
| Swansea | Singleton Hospital     | Judith Gooding             | Pharmacist |
| Swansea | Singleton Hospital     | Maria Johnstone            |            |
| Swansea | Singleton Hospital     | Michelle Romano            |            |
| Swansea | Singleton Hospital     | Renata Poole               | Pharmacist |
| Swansea | Singleton Hospital     | Alison Stretch             |            |
| Swansea | Singleton Hospital     | Amanda Jackson             |            |
| Swansea | Singleton Hospital     | Donna Lear                 |            |
| Swansea | Singleton Hospital     | Gail Povey                 |            |
| Swansea | Singleton Hospital     | Jayne Caparros             |            |
| Swansea | Singleton Hospital     | Leanne Quinn               |            |
| Swansea | Singleton Hospital     | Lisa Ellis                 |            |
| Swansea | Singleton Hospital     | Lorraine Gammon            |            |
| Swansea | Singleton Hospital     | Nia Viney                  |            |
| Swansea | Singleton Hospital     | Susie Pitcher              |            |
| Swansea | Singleton Hospital     | Tracey Ford                |            |
| Swansea | Singleton Hospital     | John Wagstaff              |            |
| Swindon | Great Western Hospital | Dorota Marciniak           |            |
| Swindon | Great Western Hospital | Raj Jampana                |            |
| Swindon | Great Western Hospital | Aruna Medisetti            |            |
| Swindon | Great Western Hospital | David J Cole               |            |
| Swindon | Great Western Hospital | Dorothe Maramak            |            |
| Swindon | Great Western Hospital | Esme Hill                  |            |

|         |                        |                        |            |
|---------|------------------------|------------------------|------------|
| Swindon | Great Western Hospital | Gerard Andrade         |            |
| Swindon | Great Western Hospital | Omar Khan              | PI         |
| Swindon | Great Western Hospital | Shiroma De Silva-Minor |            |
| Swindon | Great Western Hospital | Victoria Gibson        |            |
| Swindon | Great Western Hospital | Emma Wakefield         | Pharmacist |
| Swindon | Great Western Hospital | Graham Brown           |            |
| Swindon | Great Western Hospital | Joseph Stevens         |            |
| Swindon | Great Western Hospital | Ronak Patel            |            |
| Swindon | Great Western Hospital | Tim Owen               |            |
| Swindon | Great Western Hospital | Christopher Clarke     |            |
| Swindon | Great Western Hospital | David Newell           |            |
| Swindon | Great Western Hospital | Jonathan Lewis         |            |
| Swindon | Great Western Hospital | Mike Lewis             |            |
| Swindon | Great Western Hospital | Vivian Zinyemba        |            |
| Swindon | Great Western Hospital | Chanelle Meyer         |            |
| Swindon | Great Western Hospital | Karen Smith            |            |
| Swindon | Great Western Hospital | Rebecca Belcher        |            |
| Swindon | Great Western Hospital | Sarah Cotton           |            |
| Swindon | Great Western Hospital | Sue Meakin             |            |
| Swindon | Great Western Hospital | Amanda Colston         |            |
| Swindon | Great Western Hospital | Caroline Pensotti      |            |
| Swindon | Great Western Hospital | Debbie Palmer          |            |
| Swindon | Great Western Hospital | Jean Kordula           |            |
| Swindon | Great Western Hospital | Laura McCafferty       |            |
| Swindon | Great Western Hospital | Lesley Haxton          |            |
| Swindon | Great Western Hospital | Sarah Grayland         |            |
| Swindon | Great Western Hospital | Sarah Long             |            |
| Swindon | Great Western Hospital | Catherine Lewis Clarke |            |
| Swindon | Great Western Hospital | Cerila Parajes         |            |
| Swindon | Great Western Hospital | Deborah Scott          |            |
| Swindon | Great Western Hospital | Donna Lake             |            |
| Swindon | Great Western Hospital | Fahad Fazal            |            |
| Swindon | Great Western Hospital | Rachel Messenger       |            |
| Swindon | Great Western Hospital | Suzannah Pegler        |            |

|         |                        |                            |      |
|---------|------------------------|----------------------------|------|
| Swindon | Great Western Hospital | Aiste Baltramaityte        |      |
| Swindon | Great Western Hospital | Ania Jones                 |      |
| Swindon | Great Western Hospital | Ellen Starling             |      |
| Swindon | Great Western Hospital | Ellie Hewitt               |      |
| Swindon | Great Western Hospital | Nicola Cowling             |      |
| Swindon | Great Western Hospital | Sally-Ann Parkin (nee) Lee |      |
| Swindon | Great Western Hospital | Tracey Sargent             |      |
| Swindon | Great Western Hospital | Helen Winter               |      |
| Swindon | Great Western Hospital | Jan Dodge                  |      |
| Swindon | Great Western Hospital | Tracey Sargent             |      |
| Taunton | Musgrove Park Hospital | Clair Brunner              |      |
| Taunton | Musgrove Park Hospital | Elena Macleod              |      |
| Taunton | Musgrove Park Hospital | Hannah Berry               |      |
| Taunton | Musgrove Park Hospital | Joanne Botten              |      |
| Taunton | Musgrove Park Hospital | Manivannan Periasamy       |      |
| Taunton | Musgrove Park Hospital | Mohini Varughese           | Co-I |
| Taunton | Musgrove Park Hospital | Nicola Cox                 | Co-I |
| Taunton | Musgrove Park Hospital | Olivia Fraser              |      |
| Taunton | Musgrove Park Hospital | Darren Brady               |      |
| Taunton | Musgrove Park Hospital | Emma Gray                  | PI   |
| Taunton | Musgrove Park Hospital | George Plataniotis         |      |
| Taunton | Musgrove Park Hospital | Gihan Ratnayake            |      |
| Taunton | Musgrove Park Hospital | John Graham                | PI   |
| Taunton | Musgrove Park Hospital | Joseph Jelski              |      |
| Taunton | Musgrove Park Hospital | Manjusha Keni              |      |
| Taunton | Musgrove Park Hospital | Mary Tighe                 |      |
| Taunton | Musgrove Park Hospital | Rebecca Denslow            | Co-I |
| Taunton | Musgrove Park Hospital | Robert Zorica              |      |
| Taunton | Musgrove Park Hospital | Abby Farzaneh              |      |
| Taunton | Musgrove Park Hospital | Amy Sawyer                 |      |
| Taunton | Musgrove Park Hospital | Christina Branfield        |      |
| Taunton | Musgrove Park Hospital | Corinne Pawley             |      |
| Taunton | Musgrove Park Hospital | Hayley Cornall             |      |
| Taunton | Musgrove Park Hospital | Jasmine Youens             |      |

|         |                               |                      |            |
|---------|-------------------------------|----------------------|------------|
| Taunton | Musgrove Park Hospital        | Odunayo Kalejaiye    |            |
| Taunton | Musgrove Park Hospital        | Rachel Coe           |            |
| Taunton | Musgrove Park Hospital        | Rebecca Brown        |            |
| Taunton | Musgrove Park Hospital        | Rebecca Twemlow      |            |
| Taunton | Musgrove Park Hospital        | Guillermo Reina-Ruiz |            |
| Taunton | Musgrove Park Hospital        | John Allinson-Smith  |            |
| Taunton | Musgrove Park Hospital        | Joshua Woollven      |            |
| Taunton | Musgrove Park Hospital        | Lee Talbot           |            |
| Taunton | Musgrove Park Hospital        | Luke Stephens        | Pharmacist |
| Taunton | Musgrove Park Hospital        | Tamlyn Russell       |            |
| Taunton | Musgrove Park Hospital        | Ian Bodger           |            |
| Taunton | Musgrove Park Hospital        | Jarrod Dunn          | Pharmacist |
| Taunton | Taunton and Somerset Hospital | Jarrod Dunn          | Pharmacist |
| Taunton | Musgrove Park Hospital        | Richard Burgess      |            |
| Taunton | Musgrove Park Hospital        | Ruaraidh MacDonagh   |            |
| Taunton | Taunton and Somerset Hospital | Ruaraidh MacDonagh   |            |
| Taunton | Musgrove Park Hospital        | Simon Goldsworthy    |            |
| Taunton | Musgrove Park Hospital        | Alison Snell         |            |
| Taunton | Musgrove Park Hospital        | Amanda Groves        |            |
| Taunton | Musgrove Park Hospital        | Ceri Poyntz-wright   |            |
| Taunton | Musgrove Park Hospital        | Clair Hinton         |            |
| Taunton | Musgrove Park Hospital        | Claire Sowerby       |            |
| Taunton | Musgrove Park Hospital        | Fiona Goodchild      |            |
| Taunton | Musgrove Park Hospital        | Francesca Allen      |            |
| Taunton | Musgrove Park Hospital        | Joanne Rogers        |            |
| Taunton | Musgrove Park Hospital        | Joanne Taylor        |            |
| Taunton | Musgrove Park Hospital        | Lynn Leat            |            |
| Taunton | Musgrove Park Hospital        | Sue Mahoney          |            |
| Taunton | Musgrove Park Hospital        | Susan Crouch         |            |
| Taunton | Musgrove Park Hospital        | Michelle Farrar      |            |
| Taunton | Musgrove Park Hospital        | Alison Whitcher      |            |
| Taunton | Musgrove Park Hospital        | Anna Masamba         |            |
| Taunton | Musgrove Park Hospital        | Catherine Lane       |            |
| Taunton | Musgrove Park Hospital        | Christine Webster    |            |

|                |                                             |                      |            |
|----------------|---------------------------------------------|----------------------|------------|
| Taunton        | Musgrove Park Hospital                      | Fen Lewen            |            |
| Taunton        | Musgrove Park Hospital                      | Joan Kemp            | Pharmacist |
| Taunton        | Musgrove Park Hospital                      | Karen Tanner         |            |
| Taunton        | Musgrove Park Hospital                      | Martha Wrigley       |            |
| Taunton        | Musgrove Park Hospital                      | Moira Tait           |            |
| Taunton        | Musgrove Park Hospital                      | Nicola Cutmore       |            |
| Taunton        | Musgrove Park Hospital                      | Rebecca Purnell      |            |
| Taunton        | Musgrove Park Hospital                      | Samantha Northover   |            |
| Taunton        | Musgrove Park Hospital                      | Sara Green           |            |
| Taunton        | Musgrove Park Hospital                      | Sara Myers           |            |
| Taunton        | Musgrove Park Hospital                      | Alison Chedham       |            |
| Taunton        | Musgrove Park Hospital                      | Angela Locke         |            |
| Taunton        | Musgrove Park Hospital                      | Jan Ashcroft         |            |
| Taunton        | Taunton and Somerset Hospital               | Jan Ashcroft         |            |
| Taunton        | Musgrove Park Hospital                      | Joy Rowe             | Pharmacist |
| Taunton        | Musgrove Park Hospital                      | Judith Mathie        |            |
| Taunton        | Taunton and Somerset Hospital               | Judith Mathie        |            |
| Taunton        | Musgrove Park Hospital                      | Lisa Bower           |            |
| Taunton        | Musgrove Park Hospital                      | Lucy Howell-Drewett  |            |
| Taunton        | Musgrove Park Hospital                      | Nita Beacham         |            |
| Taunton        | Musgrove Park Hospital                      | Rebecca Tucker       |            |
| Taunton        | Taunton and Somerset Hospital               | Rebecca Tucker       |            |
| Taunton        | Musgrove Park Hospital                      | Rebecca Wallbutton   |            |
| Tessin         | Istituto Oncologico della Svizzera Italiana | Anna Llado           |            |
| Tessin         | Istituto Oncologico della Svizzera Italiana | Enrico Roggero       | PI         |
| Tessin         | Istituto Oncologico della Svizzera Italiana | Barbara Marongiu     |            |
| Tessin         | Istituto Oncologico della Svizzera Italiana | Michele Moro         |            |
| Tessin         | Istituto Oncologico della Svizzera Italiana | Sabine Van Den Bosch |            |
| Thornton Heath | Croydon University Hospital                 | Jane Thomson         |            |
| Torquay        | Torbay District General Hospital            | Helen Saxby          |            |
| Torquay        | Torbay District General Hospital            | Victoria Bell        |            |
| Torquay        | Torbay District General Hospital            | Victoria Cope        |            |
| Torquay        | Torbay District General Hospital            | Anna Lydon           | PI         |
| Torquay        | Torbay District General Hospital            | Beverley Watkins     |            |

|         |                                  |                        |            |
|---------|----------------------------------|------------------------|------------|
| Torquay | Torbay District General Hospital | Erica Watts            |            |
| Torquay | Torbay District General Hospital | Fiona Roberts          | Co-I       |
| Torquay | Torbay District General Hospital | Jorg Michels           |            |
| Torquay | Torbay District General Hospital | Rajaguru Srinivasan    |            |
| Torquay | Torbay District General Hospital | Emily Flavell          |            |
| Torquay | Torbay District General Hospital | Helen Kimber           |            |
| Torquay | Torbay District General Hospital | Kirsty Jones           |            |
| Torquay | Torbay District General Hospital | Kirsty Pearce          |            |
| Torquay | Torbay District General Hospital | Sally Wells            | Pharmacist |
| Torquay | Torbay District General Hospital | Sophie Gittus          |            |
| Torquay | Torbay District General Hospital | Stacey Davies          |            |
| Torquay | Torbay District General Hospital | Linda Welsh            |            |
| Torquay | Torbay District General Hospital | Kenneth Almedilla      |            |
| Torquay | Torbay District General Hospital | Lee Merry              |            |
| Torquay | Torbay District General Hospital | Peter Fletcher         |            |
| Torquay | Torbay District General Hospital | Peter Pugh             |            |
| Torquay | Torbay District General Hospital | Seamus McDermott       |            |
| Torquay | Torbay District General Hospital | Andrew Harford-Brown   |            |
| Torquay | Torbay District General Hospital | Magdi Kirolos          |            |
| Torquay | Torbay District General Hospital | Mark Brennan           |            |
| Torquay | Torbay District General Hospital | Martyn Blundell        | Pharmacist |
| Torquay | Torbay District General Hospital | Robert Mason           |            |
| Torquay | Torbay District General Hospital | Angela Foulds          |            |
| Torquay | Torbay District General Hospital | Kirsty Lester          |            |
| Torquay | Torbay District General Hospital | Lauren Blunt           |            |
| Torquay | Torbay District General Hospital | Michele Allison        |            |
| Torquay | Torbay District General Hospital | Shelley Chamberlain    |            |
| Torquay | Torbay District General Hospital | Tyler Lowe             |            |
| Torquay | Torbay District General Hospital | Christine Rawlings     |            |
| Torquay | Torbay District General Hospital | Donna Cuffe            |            |
| Torquay | Torbay District General Hospital | Elaine Vandecandalaere |            |
| Torquay | Torbay District General Hospital | Amy Millington         |            |
| Torquay | Torbay District General Hospital | Catherine Brookman     |            |
| Torquay | Torbay District General Hospital | Catherine Marshall     |            |

|         |                                  |                   |            |
|---------|----------------------------------|-------------------|------------|
| Torquay | Torbay District General Hospital | Classy Lam        |            |
| Torquay | Torbay District General Hospital | Emmie Arbury      |            |
| Torquay | Torbay District General Hospital | Fleur Rogers      |            |
| Torquay | Torbay District General Hospital | Janet Palmer      |            |
| Torquay | Torbay District General Hospital | Petra Gee         |            |
| Torquay | Torbay District General Hospital | Sally Maddison    |            |
| Torquay | Torbay District General Hospital | Sarah Rees        |            |
| Torquay | Torbay District General Hospital | Sophie Norman     |            |
| Torquay | Torbay District General Hospital | Sue Forbes        |            |
| Torquay | Torbay District General Hospital | Amanda Vian       |            |
| Torquay | Torbay District General Hospital | Helen Greedus     |            |
| Torquay | Torbay District General Hospital | Ingrid Koehler    |            |
| Torquay | Torbay District General Hospital | Jo Blurton        |            |
| TORQUAY | Torbay District General Hospital | Lorraine Thornton |            |
| Torquay | Torbay District General Hospital | Louise Paatz      | Pharmacist |
| Torquay | Torbay District General Hospital | Lyn Micklewright  |            |
| Torquay | Torbay District General Hospital | Melody Cross      |            |
| Torquay | Torbay District General Hospital | Sarah Wright      |            |
| Torquay | Torbay District General Hospital | Victoria Bell     |            |



## INDUSTRY COLLABORATORS

### **Clovis Oncology**

Support for the STAMPEDE trial has been provided by Clovis Oncology.

### **Janssen**

Laurent Antoni

Joaquin Casariego garcia luben

Ilde Herrygars

Florence Lefresne

Rod Murphy

Mohamed Samir

Hind Stitou

Support for the STAMPEDE trial has been provided by Janssen.

### **Novartis**

Support for the STAMPEDE trial has been provided by Novartis Pharmaceuticals UK Limited.

### **Sanofi-Aventis**

Paul Cadle

Christine Geffriaud-Ricouard

Zsuzsanna Devecseri

Support for the STAMPEDE study has been provided by Sanofi-Aventis.

### **Pfizer**

Pam Brambles

Support for the STAMPEDE study has been provided Pfizer

### **Astellas**

John Galfin

Karla Martins

Gunther Boysen

Padraig Moran

Support for the STAMPEDE study has been provided by astellas

## **PARTICIPANTS**

Nearly 12,000 people have chosen to participate in STAMPEDE. In addition to their clinical teams, they have been supported by family, friends and other key people. Every person who has participated in the trial is appreciated by the trial team and should be appreciated by the wider public. The findings from clinical trials can change practice for the future, but clinical trials only happen because people find the time and make the effort to support them. Thank you.
